# Supplementary material for: Eco-evolutionary strategies for relieving carbon limitation under salt stress differ across microbial clades
Source: Research Square preprint supplement (doi:10.21203/rs.3.rs-3322692/v1), 2023-09-21
Supplement: Supplementary file 1 [file 78c394f9cee56263f86d629f.pdf]

## Reporting Summary

Nature Portfolio wishes to improve the reproducibility of the work that we publish. This form provides structure for consistency and transparency in reporting. For further information on Nature Portfolio policies, see our [Editorial Policies](#) and the [Editorial Policy Checklist](#).

### Statistics

For all statistical analyses, confirm that the following items are present in the figure legend, table legend, main text, or Methods section.

n/a Confirmed

- |                                     |                                     |                                                                                                                                                                                                                                                            |
|-------------------------------------|-------------------------------------|------------------------------------------------------------------------------------------------------------------------------------------------------------------------------------------------------------------------------------------------------------|
| <input type="checkbox"/>            | <input checked="" type="checkbox"/> | The exact sample size ( $n$ ) for each experimental group/condition, given as a discrete number and unit of measurement                                                                                                                                    |
| <input type="checkbox"/>            | <input checked="" type="checkbox"/> | A statement on whether measurements were taken from distinct samples or whether the same sample was measured repeatedly                                                                                                                                    |
| <input type="checkbox"/>            | <input checked="" type="checkbox"/> | The statistical test(s) used AND whether they are one- or two-sided<br><i>Only common tests should be described solely by name; describe more complex techniques in the Methods section.</i>                                                               |
| <input type="checkbox"/>            | <input checked="" type="checkbox"/> | A description of all covariates tested                                                                                                                                                                                                                     |
| <input type="checkbox"/>            | <input checked="" type="checkbox"/> | A description of any assumptions or corrections, such as tests of normality and adjustment for multiple comparisons                                                                                                                                        |
| <input type="checkbox"/>            | <input checked="" type="checkbox"/> | A full description of the statistical parameters including central tendency (e.g. means) or other basic estimates (e.g. regression coefficient) AND variation (e.g. standard deviation) or associated estimates of uncertainty (e.g. confidence intervals) |
| <input type="checkbox"/>            | <input checked="" type="checkbox"/> | For null hypothesis testing, the test statistic (e.g. $F$ , $t$ , $r$ ) with confidence intervals, effect sizes, degrees of freedom and $P$ value noted<br><i>Give <math>P</math> values as exact values whenever suitable.</i>                            |
| <input checked="" type="checkbox"/> | <input type="checkbox"/>            | For Bayesian analysis, information on the choice of priors and Markov chain Monte Carlo settings                                                                                                                                                           |
| <input checked="" type="checkbox"/> | <input type="checkbox"/>            | For hierarchical and complex designs, identification of the appropriate level for tests and full reporting of outcomes                                                                                                                                     |
| <input checked="" type="checkbox"/> | <input type="checkbox"/>            | Estimates of effect sizes (e.g. Cohen's $d$ , Pearson's $r$ ), indicating how they were calculated                                                                                                                                                         |

*Our web collection on [statistics for biologists](#) contains articles on many of the points above.*

### Software and code

Policy information about [availability of computer code](#)

|                 |                                                                                                                                                                                                                 |
|-----------------|-----------------------------------------------------------------------------------------------------------------------------------------------------------------------------------------------------------------|
| Data collection | For data collection, a combination of Fastp (v0.20.0), MEGAHIT (v1.1.2), Prodigal (v2.6.3), CD-HIT (v4.6.1) and SOAPaligner (soap2.21release) were used.                                                        |
| Data analysis   | The data analysis included Ordinary least squares linear, Mann-Whitney U test, nonmetric multidimensional scaling (NMDS), random forest, etc. The statistical analysis were calculated with R software (3.6.1). |

For manuscripts utilizing custom algorithms or software that are central to the research but not yet described in published literature, software must be made available to editors and reviewers. We strongly encourage code deposition in a community repository (e.g. GitHub). See the Nature Portfolio [guidelines for submitting code & software](#) for further information.

### Data

Policy information about [availability of data](#)

All manuscripts must include a [data availability statement](#). This statement should provide the following information, where applicable:

- Accession codes, unique identifiers, or web links for publicly available datasets
- A description of any restrictions on data availability
- For clinical datasets or third party data, please ensure that the statement adheres to our [policy](#)

All the materials, raw data, and protocols used in the article are available upon request, and all data will be made publicly available in a public repository (Figshare) upon publication.

## Human research participants

Policy information about [studies involving human research participants and Sex and Gender in Research.](#)

|                             |                                                                                                                               |
|-----------------------------|-------------------------------------------------------------------------------------------------------------------------------|
| Reporting on sex and gender | This article includes both female and male authors.                                                                           |
| Population characteristics  | The authors of this article are from Asia and North America.                                                                  |
| Recruitment                 | Authors contribution are described in the article.                                                                            |
| Ethics oversight            | Our research protocol is described in the method section. This research protocol did not cause any environmental disturbance. |

Note that full information on the approval of the study protocol must also be provided in the manuscript.

## Field-specific reporting

Please select the one below that is the best fit for your research. If you are not sure, read the appropriate sections before making your selection.

☐ Life sciences ☐ Behavioural & social sciences ☒ Ecological, evolutionary & environmental sciences

For a reference copy of the document with all sections, see [nature.com/documents/nr-reporting-summary-flat.pdf](https://nature.com/documents/nr-reporting-summary-flat.pdf)

## Ecological, evolutionary & environmental sciences study design

All studies must disclose on these points even when the disclosure is negative.

|                          |                                                                                                                                                                                                                                                                                                                                                  |
|--------------------------|--------------------------------------------------------------------------------------------------------------------------------------------------------------------------------------------------------------------------------------------------------------------------------------------------------------------------------------------------|
| Study description        | In the current study, through shotgun metagenomic sequencing of coastal soils along a salinity gradient, we uncovered different eco-evolutionary strategies between bacteria and archaea under salt stress.                                                                                                                                      |
| Research sample          | A total of 37 coastal soil samples along a salinity gradient were analyzed in this study.                                                                                                                                                                                                                                                        |
| Sampling strategy        | A total of 37 topsoil samples were collected across a salinity gradient, with electric conductivity (EC) ranging from 0.14 dS m <sup>-1</sup> to 13.65 dS m <sup>-1</sup> .                                                                                                                                                                      |
| Data collection          | We focused on the genomic information of 500 microorganisms (400 bacteria and 100 archaea) with different response to salt stress, including their genome size, Kyoto Encyclopedia of Genes and Genomes (KEGG) pathways, overall KEGG Orthologies (KOs), specific KOs/genes encoding for salt-resistance and carbon-acquisition (C-acquisition). |
| Timing and spatial scale | Soil samples were collected in October 2019 and in Dongying (37°86'- 38°11'N, 118°23'E- 118°97'E) near the border of the Bohai Gulf, north of Shandong Province, China.                                                                                                                                                                          |
| Data exclusions          | N/A                                                                                                                                                                                                                                                                                                                                              |
| Reproducibility          | Information about the sampled locations and methods used in this manuscript are included in our Methods section.                                                                                                                                                                                                                                 |
| Randomization            | N/A                                                                                                                                                                                                                                                                                                                                              |
| Blinding                 | N/A                                                                                                                                                                                                                                                                                                                                              |

Did the study involve field work? ☐ Yes ☒ No

## Reporting for specific materials, systems and methods

We require information from authors about some types of materials, experimental systems and methods used in many studies. Here, indicate whether each material, system or method listed is relevant to your study. If you are not sure if a list item applies to your research, read the appropriate section before selecting a response.

## Materials & experimental systems

|                                     |                                                        |
|-------------------------------------|--------------------------------------------------------|
| n/a                                 | Involved in the study                                  |
| <input checked="" type="checkbox"/> | <input type="checkbox"/> Antibodies                    |
| <input checked="" type="checkbox"/> | <input type="checkbox"/> Eukaryotic cell lines         |
| <input checked="" type="checkbox"/> | <input type="checkbox"/> Palaeontology and archaeology |
| <input checked="" type="checkbox"/> | <input type="checkbox"/> Animals and other organisms   |
| <input checked="" type="checkbox"/> | <input type="checkbox"/> Clinical data                 |
| <input checked="" type="checkbox"/> | <input type="checkbox"/> Dual use research of concern  |

## Methods

|                                     |                                                 |
|-------------------------------------|-------------------------------------------------|
| n/a                                 | Involved in the study                           |
| <input checked="" type="checkbox"/> | <input type="checkbox"/> ChIP-seq               |
| <input checked="" type="checkbox"/> | <input type="checkbox"/> Flow cytometry         |
| <input checked="" type="checkbox"/> | <input type="checkbox"/> MRI-based neuroimaging |
