# Supplementary material for: Eco-evolutionary strategies for relieving carbon limitation under salt stress differ across microbial clades
Source: Research Square preprint supplement (doi:10.21203/rs.3.rs-3322692/v1), 2023-09-21
Supplement: Supplementary file 1 [file 1098e9d7d21c156f8769c083.xlsx]

## Sheet: nega_arch
phylum	species	HK4	HK14	HK50	HK19	HK45	HK97	HK56	HK88	HK9	HK37	HK87	HK103	HK31	HK34	HK59	HK61	HK10	HK100	HK74	HK41	HK95	HK30	HK48	HK2	HK67	HK17	HK110	HK77	HK71	HK54	HK26	HK64	HK23	HK79	HK106	HK91	HK83
p__Candidatus_Bathyarchaeota	s__Candidatus_Bathyarchaeota_archaeon_RBG_13_38_9	31.2512	1.04762	8.29094	23.8606	20.168	2.34372	33.6654	1.60193	5.7393	25.1927	15.5191	17.6463	26.3682	8.17923	13.5637	2.05007	9.19165	18.5946	53.6301	14.3317	6.16214	3.98905	31.5463	46.9693	4.61287	0.865726	18.4132	11.7386	17.5158	28.2723	0.740764	1.59215	31.8074	13.4044	2.3871	0.81953	4.641
p__Crenarchaeota	s__Crenarchaeota_archaeon_13_1_20CM_2_51_8	42.1061	6.1049	22.4416	35.7164	60.3387	2.97675	27.2755	6.66732	12.3231	38.1128	3.05322	51.2321	42.8587	31.8538	0.0526861	4.01388	21.8599	28.6549	24.5836	38.1643	2.05877	27.1293	41.5586	24.6636	12.0473	2.94007	27.859	49.3246	30.652	35.545	5.316	3.85476	40.3924	40.0265	7.88862	1.23869	11.2416
p__Crenarchaeota	s__uncultured_crenarchaeote	271.866	4.32541	17.1086	189.545	180.008	3.54001	259.793	13.6744	20.2188	214.485	5.77078	162.179	200.489	86.9695	2.98896	5.54812	64.6745	140.379	411.457	143.027	11.2417	9.76789	254.882	344.53	10.091	11.6507	145.227	99.9893	136.175	194.711	2.36305	5.46807	253.597	174.392	2.12271	5.24018	0.353905
p__Crenarchaeota	s__uncultured_crenarchaeote_29d5	154.74	1.87199	2.05063	107.508	103.942	1.03736	112.972	2.74888	5.91668	105.696	0.872255	86.3142	112.83	42.4123	0	0.697099	36.6536	71.1072	258.308	73.2832	3.67459	4.22259	132.7	199.257	4.24086	8.26116	62.4199	44.774	66.0043	111.235	0.900533	1.25332	118.797	76.6123	0.826544	0.910464	0.24099
p__Crenarchaeota	s__uncultured_crenarchaeote_57a5	22.8999	0.241052	2.52838	22.0565	18.5244	0.308902	17.8021	0.363641	1.97427	18.1246	0	14.3759	19.0628	3.80178	0	0	7.89705	11.7169	30.9394	8.57682	0.139636	1.02832	11.6446	20.1699	0.634595	1.01282	8.74403	11.4486	12.0582	15.919	0.214178	0.421385	23.0571	15.8335	0.0945653	0.456187	0
p__Crenarchaeota	s__uncultured_crenarchaeote_76h13	65.4612	0.478345	1.82263	40.4187	38.1449	0.864071	89.6633	2.17553	2.31487	36.7377	0.495628	32.0414	37.6513	20.9823	0	0.42975	10.9601	28.8971	74.3742	20.9083	0.740569	1.21555	53.5825	93.0566	1.65579	1.86328	30.6617	23.2163	31.0675	36.8928	0.268149	0.173348	54.7276	41.3759	0.232045	1.03805	0
p__Euryarchaeota	s__Methanofervidicoccus_sp._A16	34.3447	0.84808	14.3978	26.1737	23.3931	0.714006	24.9965	1.76629	11.1673	38.2147	0.844585	27.9967	31.2713	11.9468	0.0708537	0.902524	11.7377	25.5967	24.6407	21.8564	3.7846	5.35865	24.1062	22.3982	1.53872	2.82867	13.4653	27.7914	22.9176	13.6619	0.918214	1.3884	32.3501	31.9452	0.59449	0.29054	0.540601
p__Euryarchaeota	s__Methanosarcina_barkeri	23.3075	4.8811	11.9547	16.6378	14.2331	3.91116	52.7803	6.79995	9.41587	20.5234	9.92741	12.2701	19.0237	9.87128	26.5826	11.9495	12.9464	8.38163	10.3679	17.5414	9.01091	8.07796	15.2723	5.62397	7.51246	4.9094	12.663	8.72709	14.8304	10.993	5.4979	11.0189	15.5892	30.9979	14.2559	6.70095	22.0364
p__Euryarchaeota	s__Methanosarcina_horonobensis	27.2877	10.3822	14.2049	15.1964	15.0876	5.61869	60.8259	10.494	9.89879	32.2153	11.8134	13.4393	20.4367	8.73583	51.592	3.49333	15.5627	6.48615	13.6572	15.9212	9.21818	16.418	23.4587	11.93	9.17005	14.7788	14.9164	51.9264	22.007	16.6177	6.71316	5.95507	25.8387	11.308	13.8111	10.3332	10.4878
p__Thaumarchaeota	s__Candidatus_Nitrosocaldus_cavascurensis	34.294	0.545788	4.96024	13.6851	21.8421	0.909613	20.95	2.67521	2.35851	32.321	0	16.3554	26.7321	8.57307	0	0	7.0219	10.9511	38.5462	18.132	0.797275	3.18425	20.3256	22.3511	3.0322	2.59437	14.2079	20.1919	17.3051	12.3188	0.488203	0.980462	24.9659	17.4409	0.274732	1.58336	0
p__Thaumarchaeota	s__Candidatus_Nitrosocosmicus_arcticus	1522	55.7158	967.134	1183.42	1499.29	42.1898	925.618	110.514	748.445	1545.4	29.2676	1371.85	1779.11	413.422	15.0013	416.261	408.726	1095.12	1282.36	955.541	40.3069	417.833	1148	859.288	282.295	119.855	751.816	965.905	1298.42	667.734	60.5542	109.19	1409.33	2151.69	445.756	960.248	527.56
p__Thaumarchaeota	s__Candidatus_Nitrosocosmicus_exaquare	3691.6	28.2312	456.174	783.763	1408.44	28.0818	1069.97	65.5414	400.479	2364.98	12.3491	1073.56	1834.11	298.967	8.39594	177.562	273.723	1330.98	1395.89	858.784	29.9075	250.118	923.832	1250.94	135.841	61.6209	775.527	1747.81	3413.62	737.674	46.7587	55.1268	1553.43	1485.26	184.85	393.441	205.401
p__Thaumarchaeota	s__Candidatus_Nitrosocosmicus_franklandus	3984.81	32.538	532.281	853.737	1579.72	40.7242	928.746	72.8765	459.477	2671.04	22.0392	1332.06	1993.23	351.945	9.25914	221.974	333.425	1600.84	1487.32	964.001	25.0065	228.162	985.877	1529.24	155.182	74.7308	863.262	1872.54	3743.14	790.963	51.8426	66.4667	1617.43	1885.08	198.205	461.154	257.252
p__Thaumarchaeota	s__Candidatus_Nitrosocosmicus_oleophilus	2201.99	59.5574	964.114	1321.8	1775.42	56.0388	1111.53	112.36	902.284	1945.58	23.513	1573.8	2008.4	516.768	12.0428	398.646	530.364	1263.62	1569.9	1109.64	47.9096	453.937	1299.82	1028.89	283.449	120.712	874.576	1402.64	1814.32	868.701	69.2018	106.022	1642.87	2260.12	391.978	865.259	523.468
p__Thaumarchaeota	s__Candidatus_Nitrosocosmicus_sp.	2620.99	32.7262	435.128	1083.27	1272.39	32.1263	2671.12	62.2224	353.95	1707.73	15.1598	1474.41	2948.09	411.812	8.05466	153.667	274.445	1452.62	1575.47	819.82	28.1159	205.015	1247.41	1222.19	124.982	75.3526	1021.93	1090.26	2358.25	724.047	96.5051	52.4955	2645.93	1569	161.385	323.538	174.007
p__Thaumarchaeota	s__Candidatus_Nitrosocosmicus_sp._SS	978.072	26.9298	393.51	649.446	888.343	26.8878	536.396	48.3054	338.912	967.282	7.12575	767.486	961.372	238.156	5.88603	136.006	273.379	661.69	793.221	593.602	28.1632	236.473	624.414	514.654	116.725	70.5496	406.172	625.385	820.39	410.337	31.2765	45.85	819.482	1074.03	140.176	310.891	184.797
p__Thaumarchaeota	s__Candidatus_Nitrosopelagicus_brevis	23.3091	0.430562	8.6974	12.9279	24.207	1.15665	17.9404	0	5.07892	25.1078	0	16.8055	18.0908	6.31772	0.810327	3.75672	8.12692	14.7581	19.449	15.4479	1.34746	2.40118	12.1657	12.0941	1.10408	1.17609	9.77994	11.8684	16.2618	12.5208	0.137322	1.34473	21.1625	24.6448	0.45186	0.562278	0
p__Thaumarchaeota	s__Candidatus_Nitrososphaera_evergladensis	1829.03	52.6474	388.144	935.202	1848.12	43.2493	776.56	140.755	274.081	1814.54	20.6583	1207.69	1905.64	772.111	11.5425	49.0162	434.775	823.361	1776.66	990.979	49.3243	849.251	1795.28	835.266	196.79	100.064	651.975	739.885	790.55	800.815	62.4007	54.6213	1420.06	1285.82	30.9402	40.2762	36.6887
p__Thaumarchaeota	s__Candidatus_Nitrososphaera_gargensis	7748.44	187.985	892.495	2179.41	7973.46	105.731	2307.17	775.929	741.846	10082.8	83.4189	3630.51	5881.89	1473.15	65.0576	146.173	1678.54	3317.43	10058.6	4728.62	302.364	1909.7	4472.1	4667.57	409.936	506.142	2769.16	2762.22	3268.43	2786.92	231.885	203.608	4444.94	4695.03	106.308	247.08	121.683
p__Thaumarchaeota	s__Candidatus_Nitrososphaera_sp._13_1_40CM_48_12	325.531	9.17836	29.3952	85.8177	303.335	5.3824	106.18	28.9869	20.8267	394.669	1.36103	161.784	241.21	64.3814	2.28145	4.91079	69.0579	121.652	461.018	196.115	11.7144	65.2239	201.022	177.281	18.5953	20.2448	148.233	125.291	169.322	125.721	12.324	7.79184	202.623	227.758	1.29679	8.18693	2.99033
p__Thaumarchaeota	s__Candidatus_Nitrosotalea_bavarica	34.5946	1.86377	16.4942	37.8707	67.7611	2.04767	34.0835	3.9698	16.9413	38.1325	0.287085	40.2706	27.2603	11.1278	1.17006	0.425129	15.779	34.4967	45.4614	36.2399	1.39408	11.0847	21.7532	27.332	4.9217	4.30165	20.6202	17.8235	39.4183	36.152	0.728586	2.22241	32.5207	54.3706	0.806387	1.61204	3.0484
p__Thaumarchaeota	s__Candidatus_Nitrosotalea_devanaterra	47.7166	2.27617	7.70431	18.3179	43.0127	1.47994	30.5649	2.51436	4.61363	45.23	5.93718	19.8058	26.1869	13.4659	0.256845	4.0747	8.90434	25.7341	43.5913	30.111	2.135	6.64762	26.0836	22.9887	3.64868	5.41566	25.64	18.8463	23.3204	22.5436	4.23248	2.26782	33.7257	31.2981	1.42969	2.5718	0.583169
p__Thaumarchaeota	s__Candidatus_Nitrosotalea_okcheonensis	32.0949	2.08187	14.6312	28.4408	45.6609	1.10657	29.5218	5.81539	15.2734	45.8677	0	27.4343	36.4721	10.9689	0.699994	2.33415	15.1048	20.9338	23.144	22.8944	8.38497	15.9405	21.0956	24.1355	5.17011	6.4531	13.5232	26.7656	24.5075	16.2701	2.28806	3.11209	37.3025	46.4324	5.39567	5.68292	0.595898
p__Thaumarchaeota	s__Candidatus_Nitrosotalea_sinensis	32.966	3.11063	7.51755	23.2986	51.8459	2.71448	34.9566	2.89719	8.88651	33.5493	0.549842	33.5845	26.9406	11.2648	0	5.21669	11.9943	23.1347	37.5645	32.4745	4.42308	8.24791	19.0945	16.6032	2.03639	3.61891	23.7462	20.3626	31.7518	19.4527	1.43705	2.62565	26.2848	46.685	2.0979	1.25944	0.622985
p__Thaumarchaeota	s__Candidatus_Nitrosotalea_sp._FS	100.31	19.4101	46.2628	70.633	101.469	29.7313	40.6251	14.414	30.1411	119.401	11.9527	97.593	77.6397	64.3765	2.26691	13.6184	45.841	49.1449	87.945	71.2352	10.2333	80.2382	65.4678	41.7311	26.5066	11.7321	68.6324	59.5801	64.9332	72.8621	33.7419	9.25392	78.1229	69.4635	12.9521	19.1607	10.9261
p__Thaumarchaeota	s__Candidatus_Nitrosotenuis_aquarius	103.753	7.48794	18.1767	54.9757	67.4817	3.4893	58.9987	10.2183	21.565	401.133	0.856575	180.329	78.6905	23.7208	0.152204	9.75153	29.3426	37.5735	47.0245	47.6772	9.33656	106.29	63.0347	27.032	12.545	9.64079	46.649	60.3817	58.9635	87.0907	1.40412	3.58019	85.6378	110.777	6.87007	1.37796	6.47122
p__Thaumarchaeota	s__Candidatus_Nitrosotenuis_sp.	135.746	9.86182	16.7054	61.7602	72.7111	2.74653	62.7659	14.4593	14.8418	595.614	2.69492	243.316	109.766	23.0029	0.65747	13.1716	20.6596	28.3935	80.4325	47.7277	9.97994	159.74	84.2902	34.4509	26.8641	10.8308	81.2864	85.8169	52.0302	127.362	7.24177	5.5839	141.2	113.322	20.2609	7.44526	1.17269
p__Thaumarchaeota	s__Nitrosarchaeum_koreense	205.927	33.5379	44.7259	621.427	32.2091	5.75823	142.053	51.5495	30.0826	187.066	4.9465	390.485	434.75	545.554	1.6256	74.9894	31.9737	28.1172	14.049	22.6309	44.3765	289.343	260.116	11.1365	13.4893	5.28573	418.62	78.9616	18.596	589.018	11.342	22.5532	384.562	135.828	53.3077	26.7062	2.94137
p__Thaumarchaeota	s__Nitrosopumilales_archaeon	14758.1	229.714	1669.17	9551	16899.1	260.709	12415.6	824.772	1687.82	13713.8	177.021	9450.06	11702.7	4352.91	104.1	192.238	4179.41	7899.74	21991.9	8926.74	405.157	1434.95	12462.3	14276.1	652.518	896.593	6960.22	6836.21	8460.49	10230.8	175.315	244.396	12484.8	10536.7	180.665	298.682	231.288
p__Thaumarchaeota	s__Nitrososphaera_sp.	1235.86	41.7821	291.555	711.297	1543.3	34.805	756.706	82.169	232.276	1300.24	20.0403	931.696	1129.5	419.877	10.0142	22.8233	414.517	695.145	1261.47	943.879	40.9255	381.396	978.149	656.838	110.624	96.8106	557.106	684.413	809.064	649.375	33.8146	40.7595	993.99	1194.68	28.9561	32.1305	41.3677
p__Thaumarchaeota	s__Nitrososphaera_sp._AFS	1246.47	29.6825	227.135	577.696	1783.35	32.8963	814.509	91.7114	283.384	1363.23	15.3371	782.48	935.011	314.866	7.8302	14.3097	377.769	694.285	1472.8	882.463	32.8658	246.751	738.019	666.002	73.3975	88.5227	650.643	662.492	835.328	625.695	24.673	27.32	954.603	1103.47	20.8818	28.9685	26.224
p__Thaumarchaeota	s__Nitrososphaera_viennensis	1951.74	69.7189	449.034	1053.01	1603.37	45.1499	727.938	130.054	306.497	1715.05	28.0752	1369.34	2179.82	811.178	12.1618	35.7391	439.677	883.658	1771.67	964.279	59.3403	1021.89	2057.96	823.558	221.049	121.482	639.159	816.213	800.21	784.686	71.9222	66.9732	1486.78	1428.96	33.8422	60.2598	49.9785
p__Thaumarchaeota	s__Nitrososphaeraceae_archaeon	15652.7	394.983	5271.63	8257.51	14732.6	492.976	9504.51	797.62	10631	14449.6	223.278	12342.1	11378.5	6200.08	110.143	450.928	6092.8	8550.45	12855.3	9912.29	381.558	8373.51	9491.92	7969.82	1193.2	1367.08	7915.4	14104.8	12360.1	9145.04	456.943	293.087	13053.1	14114.1	262.189	279.253	867.234
p__Thaumarchaeota	s__Nitrososphaerales_archaeon	364.817	20.692	107.217	223.117	586.864	13.2305	341.952	36.7618	115.147	452.202	18.3623	281.668	335.05	115.671	14.2586	17.7169	157.315	265.286	342.246	335.274	30.3867	96.0826	253.209	226.805	32.6821	40.0178	176.039	206.002	304.438	223.574	13.4054	14.9712	354.12	404.01	11.2308	17.3282	23.8954
p__Thaumarchaeota	s__Nitrososphaeria_archaeon	76.7014	23.3843	33.82	45.7084	75.2335	26.8246	62.6569	36.2124	27.9712	131.697	55.2235	65.9279	65.0191	44.1927	48.2486	27.5035	34.7675	36.2283	60.9922	38.672	61.1807	38.1327	65.8233	58.0035	38.8256	58.0043	31.874	49.9612	70.0294	43.4706	28.1502	18.8253	87.0152	59.324	27.605	13.7146	47.3822
p__Thaumarchaeota	s__Thaumarchaeota_archaeon	11065.3	298.487	1699.1	5508.5	13016.9	260.252	7058.17	873.232	1709.47	11775.3	176.959	6915.73	8380.17	2846	106.717	255.257	3089.76	5645.75	13804.5	7498.74	484.169	1947.32	7121.65	7594.33	661.766	949.823	4895.44	5389.37	6531.45	5860.56	257.124	313.371	8252.47	8386.9	236.869	289.491	261.895
p__Thaumarchaeota	s__Thaumarchaeota_archaeon_13_1_20CM_2_38_5	123.002	1.9917	32.7704	78.1255	40.2335	4.69806	42.2428	3.29648	34.3793	175.246	0	57.9551	118.313	42.8359	0.435623	2.66779	23.8435	85.1149	79.114	27.6443	0.654583	9.85306	109.112	60.6512	6.8549	1.38683	27.8976	80.6901	57.5219	27.952	0.324987	2.12226	119.622	63.3786	2.18098	2.85112	5.77535
p__Thaumarchaeota	s__Thaumarchaeota_archaeon_13_1_20CM_2_39_11	213.576	3.94453	73.8485	152.906	91.0103	5.13468	70.9329	4.53724	59.5385	204.578	2.45531	105.329	156.307	59.1468	0.630687	3.51264	45.9871	139.557	156.132	50.5611	1.67368	20.9336	128.424	129.687	7.64325	6.54376	47.0652	101.06	97.4061	55.8794	1.40925	1.93352	170.034	124.622	0.46963	0.234472	6.86362
p__Thaumarchaeota	s__Thaumarchaeota_archaeon_13_1_40CM_2_39_13_1	13.1187	1.05028	16.0812	16.216	21.7196	1.46059	8.75046	4.02309	20.3949	19.8712	0	14.0726	21.6595	3.78629	0.104227	6.9013	3.84972	9.64048	8.08593	10.5211	1.85058	9.3198	18.4558	14.7261	6.18407	0.479117	3.82312	6.17125	9.54902	9.26231	0.8711	1.77431	22.7242	27.5682	7.70742	14.5332	9.6893
p__Thaumarchaeota	s__Thaumarchaeota_archaeon_13_1_40CM_2_39_13_2	53.7463	1.9806	24.8865	61.0714	43.8927	1.9358	37.5942	2.31531	28.6088	45.0349	0	52.0615	44.0934	29.6023	0	7.43362	31.8177	48.444	30.583	23.3556	1.47493	11.8386	44.3887	31.2236	4.71023	3.34526	14.8009	33.4437	51.356	34.0755	2.27165	2.36655	41.3754	75.9837	7.31896	6.19646	3.38497
p__Thaumarchaeota	s__Thaumarchaeota_archaeon_13_1_40CM_2_39_4	94.2402	1.99535	20.9531	57.7671	117.722	1.42836	51.3441	9.19703	19.5874	135.817	1.23382	60.9305	83.5475	23.2274	1.24762	2.48513	24.8547	53.5334	93.2064	71.7452	4.37263	12.0721	61.2935	63.1828	5.97972	5.03167	30.6868	45.8862	40.3369	36.2418	2.00331	1.926	74.3289	67.7116	4.1367	4.70265	4.8029
p__Thaumarchaeota	s__Thaumarchaeota_archaeon_13_1_40CM_3_38_6	32.0759	0.411549	2.67939	6.4619	30.7723	0.645107	12.2771	2.3382	8.54053	29.4854	0.555943	13.7715	18.0169	4.99376	0	0	5.31392	6.74506	30.2455	14.853	1.31182	3.59581	17.1	30.1096	2.2329	2.1299	9.85185	12.7547	11.8111	7.40949	1.09369	0.835255	18.4887	16.7953	2.91032	2.42161	0.776924
p__Thaumarchaeota	s__Thaumarchaeota_archaeon_13_1_40CM_3_50_5	412.305	12.3098	41.4161	115.197	379.638	4.28667	138.479	39.1641	41.6115	484.881	10.4557	203.689	282.386	74.7386	5.20412	5.44517	100.696	155.224	477.394	234.46	11.0611	96.7654	214.501	207.134	19.7887	31.1843	142.308	142.396	174.425	139.816	12.046	9.31287	220.155	255.204	4.04432	8.14676	5.24966
p__Thaumarchaeota	s__Thaumarchaeota_archaeon_13_1_40CM_38_12	96.6347	2.58604	23.7716	71.2652	166.164	2.16822	76.3136	8.79165	16.8583	113.845	1.9765	73.2988	76.4676	25.0088	0.64005	1.78676	37.1434	59.7851	93.6087	99.9009	4.55469	11.5167	63.583	61.5854	6.56277	8.75583	51.9967	44.9562	59.7319	64.6482	1.76471	3.01722	79.8622	98.0827	5.39636	1.45599	0.856064
p__Thaumarchaeota	s__Thaumarchaeota_archaeon_13_1_40CM_4_38_7	24.828	1.94556	1.00262	7.92095	23.7958	0.787448	16.3199	4.31501	2.04146	31.4227	0	11.9741	23.6641	5.76573	0.84767	1.70195	5.06896	11.4866	42.7585	26.685	4.94871	3.96317	13.7889	16.0999	2.22361	3.39524	10.2333	20.389	14.9399	11.5215	1.04602	0.99551	14.7681	17.7852	1.088	0.0965664	0.952205
p__Thaumarchaeota	s__Thaumarchaeota_archaeon_13_1_40CM_4_48_7	571.369	14.438	64.9825	173.893	616.528	8.7098	216.172	63.4743	52.321	769.082	10.572	294.648	451.194	124.886	2.73437	4.91444	144.401	254.8	756.159	358.852	24.825	137.44	346.883	311.787	29.523	35.6582	232.775	212.722	297.622	256.368	14.601	11.2504	371.809	369.045	8.1434	11.2481	7.30236
p__Thaumarchaeota	s__unclassified_g__Candidatus_Nitrosocaldus	44.7422	1.79747	15.5108	33.4261	36.1988	3.3147	47.1593	0.724163	5.64078	24.0318	0.392064	41.9293	36.0566	17.9151	0	1.52899	24.7399	31.9558	46.5954	24.5939	2.08599	9.04583	20.5473	31.7775	5.5217	4.58902	21.9443	27.2262	29.6943	32.8814	2.30279	2.8921	28.9668	55.4692	0.556721	1.23107	7.16783
p__Thaumarchaeota	s__unclassified_g__Nitrososphaera	37.6399	0.973264	6.53339	22.5492	43.1945	0.190463	17.8658	1.30579	10.8685	38.7259	0.691271	28.7585	41.0696	19.4233	0	0	12.9435	17.525	30.0111	23.2095	0.902707	24.7852	52.2268	11.1353	3.4385	0.0406466	17.3046	20.5356	18.9473	16.951	0.870363	1.07714	35.6261	37.2294	0.385536	1.42833	0.517092
p__unclassified_d__Archaea	s__archaeon_13_1_20CM_2_51_12	29.3953	5.90378	11.4412	32.854	55.8325	3.92886	31.5428	4.32144	11.2229	31.1429	4.60602	33.5789	38.2487	30.651	2.76363	7.47866	17.9076	24.1371	18.5188	30.5448	1.87439	23.5028	24.6813	19.1311	13.4554	10.2014	20.5593	38.3648	22.7774	24.9292	6.26997	4.79328	29.0713	17.6172	2.4965	4.70999	13.4963
p__unclassified_d__Archaea	s__uncultured_archaeon	441.049	108.377	230.891	265.117	411.979	101.312	284.005	124.394	230.176	600.154	154.39	272.665	382.416	168.818	157.973	178.616	176.289	295.177	493.018	237.439	244.252	197.637	354.475	328.439	115.686	219.195	189.234	259.438	346.947	219.634	95.1467	118.293	341.172	301.584	170.747	112.593	254.539

## Sheet: posi_arch
phylum	speci	HK4	HK14	HK50	HK19	HK45	HK97	HK56	HK88	HK9	HK37	HK87	HK103	HK31	HK34	HK59	HK61	HK10	HK100	HK74	HK41	HK95	HK30	HK48	HK2	HK67	HK17	HK110	HK77	HK71	HK54	HK26	HK64	HK23	HK79	HK106	HK91	HK83
p__Euryarchaeota	s__Haladaptatus_litoreus	9.40573	80.8962	19.1163	123.224	16.0464	589.838	3.71925	901.851	5334.3	22.069	211.817	55.4638	55.3653	26.1777	46.3096	56.6164	193.779	30.4104	11.028	4.15519	804.718	9.86859	9.83901	6.50035	359.974	1440.03	67.9544	66.596	19.5436	9.24454	13.5332	58.2441	181.94	31.6171	178.854	15.2124	151.545
p__Euryarchaeota	s__Halegenticoccus_soli	7.5423	266.437	41.0628	25.6538	12.8586	2016.41	12.809	2722.99	1218.01	6.74526	145.13	77.7883	18.398	26.0503	35.3212	141.851	204.893	15.5656	8.58377	4.59462	2241.9	22.3646	17.2555	9.77063	983.29	4344.92	37.3629	12.7494	17.2456	9.68587	50.8414	103.514	40.4637	39.5189	537.702	75.707	52.4853
p__Euryarchaeota	s__Haloarchaeobius_iranensis	2.84734	173.448	90.1223	14.0249	1.79638	2829.9	2.8154	1937.7	2622.8	1.41706	234.281	63.8792	6.08413	33.7981	24.7082	119.295	163.107	11.7754	3.34408	2.04789	967.114	8.71701	13.1307	1.23127	1019.93	3032.13	20.7989	10.8785	11.7465	4.25391	35.5113	79.14	22.4797	63.4243	612.06	27.2754	81.4398
p__Euryarchaeota	s__Haloarcula_sp._JP-L23	0	161.28	29.3274	36.9577	0.981766	2119.79	3.78887	2754.37	1177.57	3.48954	198.827	46.125	6.57624	23.7975	22.585	220.732	210.332	8.98558	0.534652	0.160906	1739.81	3.64045	7.77461	2.30766	865.797	18551.5	9.90956	4.03695	9.47387	3.76907	27.4396	78.8477	21.4823	19.234	472.388	40.395	50.3722
p__Euryarchaeota	s__Halobacteriales_archaeon_QH_7_66_36	0.732344	112.649	13.1721	5.43462	0	1846.97	1.19098	4248.22	666.224	2.85574	80.6875	38.4247	3.80167	29.3713	8.98522	72.854	275.09	2.39947	0.519425	0	1297.02	0.558438	2.66457	3.538	1238.22	9067.27	7.74553	3.01256	4.36191	0.443789	11.7237	95.2307	15.0359	14.4961	243.671	16.3669	26.9462
p__Euryarchaeota	s__Halobacteriales_archaeon_QS_1_68_20	4.45261	129.084	16.7359	9.94438	4.55694	1066.91	6.98359	1680.9	739.109	6.12757	32.9061	29.4197	5.47336	10.1893	4.8991	56.7775	75.3649	13.3601	6.53664	3.67995	1709.5	9.04182	6.6858	2.3006	479.309	3378.09	11.6404	5.77414	6.54416	3.98372	30.4951	34.0682	16.6514	9.96725	230.222	15.1414	20.0482
p__Euryarchaeota	s__Halobacteriales_archaeon_QS_4_70_19	6.0445	215.279	24.5579	20.9589	1.15175	3618.58	6.44539	4318.1	1065.9	6.46805	149.302	82.7408	13.9604	62.3473	18.8629	186.822	414.925	3.5503	9.25163	2.00976	2834.37	13.5934	13.5739	4.6564	1786.8	16193.4	31.0106	7.99023	9.84479	6.89581	43.1063	217.053	32.1341	34.3854	442.238	26.9015	54.8054
p__Euryarchaeota	s__Halobacteriales_archaeon_QS_5_70_15	5.36694	2059.88	288.38	117.353	3.30524	16285.2	13.4704	15034.9	5261.37	13.1187	438.768	363.194	33.9108	180.111	100.379	2247.84	886.198	12.5206	12.8331	5.57843	13014.4	19.9928	32.9135	12.5898	7058.87	28115.9	55.7269	21.8233	46.2853	18.4299	194.485	553.803	47.4707	191.875	5939.22	257.924	303.326
p__Euryarchaeota	s__Halobacteriales_archaeon_QS_5_70_17	1.94133	177.006	17.1824	10.6752	7.20163	1102.53	2.24243	1622.65	859.973	4.76335	91.5576	28.6277	4.11455	18.9004	9.3737	64.3515	170.958	2.86311	0.789027	0.477982	1129.27	3.63158	3.91944	3.40107	1100.63	2843.34	11.5631	5.68782	3.3865	4.27778	17.8891	113.276	17.6877	12.7686	456.783	38.0499	25.6542
p__Euryarchaeota	s__Halobacteriales_archaeon_QS_9_67_17	0.486437	77.0394	10.5014	2.39277	1.49059	1225.3	0.934172	2867.58	505.792	1.15669	64.6942	21.5341	1.22365	29.7367	5.82849	44.551	203.405	4.74965	0.302195	0.5592	862.769	2.00686	2.99911	2.01149	834.771	5933.45	7.55556	1.19903	2.96204	0.976453	9.84737	76.3765	8.4149	8.88539	164.946	10.8615	21.0238
p__Euryarchaeota	s__Halobacterium_jilantaiense	3.17246	71.0786	11.6092	8.56997	0.257521	719.604	2.99825	1913.98	3366.12	2.48388	185.934	78.7389	3.05571	13.74	27.0202	47.2582	110.994	7.25237	0	0.625924	628.326	4.20056	7.2542	0	694.52	2053.76	19.733	5.74534	4.08981	4.80069	17.4987	30.2711	12.3916	9.58691	179.532	14.7023	6.80174
p__Euryarchaeota	s__Halobacterium_sp._DL1	2.6073	110.232	18.0114	13.524	0.279692	898.596	0	2172.23	1283.41	2.70192	76.4644	122.052	3.6298	20.3383	8.61799	67.038	166.295	2.87036	1.51251	1.7364	1113.27	8.45448	3.78448	8.70847	1154.49	2375.97	14.4971	7.95495	9.02267	5.88191	16.2325	35.02	16.1506	12.9206	273.425	8.11883	22.1818
p__Euryarchaeota	s__Halobacterium_sp._PCN9	5.49013	93.9771	11.1569	6.45311	2.76094	953.207	15.0558	1905.31	774.444	0.445222	72.4575	85.833	9.44019	17.8293	10.946	53.4989	147.941	4.57387	0.480599	7.01465	939.041	9.1187	6.71284	0	895.025	2607.5	12.5807	5.46537	3.36159	5.72969	16.6875	34.0885	12.975	11.3701	206.267	11.9462	13.6048
p__Euryarchaeota	s__Halobaculum_gomorrense	6.33754	222.811	13.5689	11.9083	2.88759	1876.21	4.22525	1906.06	361.259	2.66289	145.527	78.3469	7.47687	17.7106	16.798	373.629	263.274	7.36683	4.65576	2.46415	522.559	5.11116	18.8456	4.39097	2050.01	1639.39	34.0141	12.8852	12.0858	5.35044	15.9389	416.38	13.2849	32.8273	397.356	18.3881	15.4476
p__Euryarchaeota	s__Halobaculum_sp._WSA2	5.51456	290.418	17.5244	16.0917	2.83021	5252.19	6.41221	4141.76	605.328	8.55363	249.708	108.648	14.7421	33.5504	16.5374	569.044	431.237	9.96184	2.75693	0.895431	904.404	5.91969	24.4183	0.878073	2857.58	3574.83	37.6151	19.0554	15.7865	10.5872	31.2925	581.331	18.476	57.6717	558.691	25.6636	42.4241
p__Euryarchaeota	s__Halogeometricum_pallidum	9.01369	440.16	29.1907	16.4183	7.38373	2022.19	20.0062	1339.07	546.951	10.7857	117.791	61.2909	16.0011	27.4919	21.3722	139.541	136.823	12.6507	2.39757	2.16803	754.38	12.9522	16.3018	3.77316	888.91	1921.14	27.6256	10.585	5.5769	4.8423	47.2811	82.1255	23.4201	28.9466	657.37	22.2011	32.226
p__Euryarchaeota	s__Halogeometricum_rufum	0.507257	121.867	17.672	16.5904	3.35383	1243.07	7.17537	1179.85	3656.33	4.34308	140.139	29.432	6.64623	13.603	31.8741	117.412	125.085	2.28525	0.623276	4.79833	873.678	4.73182	10.9066	0.568432	724.465	2093.43	26.1245	4.37904	3.81617	4.65476	20.4421	85.1473	19.3123	16.7854	256.633	15.7373	33.8255
p__Euryarchaeota	s__Halogranum_amylolyticum	10.7301	177.614	70.7678	78.7023	12.5326	1553.39	8.21608	2008.18	2587.7	7.94654	1250.34	90.1829	24.554	25.1386	523.118	205.692	461.402	11.3205	3.2459	7.49135	1440.93	8.97722	14.6319	7.6462	831.006	7524.72	31.3804	16.7557	12.1629	8.24692	26.0737	158.027	40.7303	58.4448	435.576	58.103	153.439
p__Euryarchaeota	s__Halogranum_gelatinilyticum	4.9793	137.286	38.1404	47.3957	5.48103	1449.52	11.1247	1751.98	1907.21	6.94413	3924.75	77.4191	13.1356	26.3443	3268.54	149.363	1025.95	5.47585	5.02014	0.415205	1158.73	12.9494	16.0849	6.29807	680.907	3080.59	26.6254	12.0492	9.04769	3.478	22.8238	154.151	25.8	41.0125	297.005	41.7893	186.79
p__Euryarchaeota	s__Halogranum_rubrum	2.15274	100.79	33.679	251.268	1.82476	759.646	21.5507	974.214	1099.4	5.39642	836.568	140.762	40.5777	14.2472	349.335	493.847	871.935	17.177	4.02454	2.47931	605.811	10.9644	43.8692	8.09539	435.003	2391.6	38.4137	5.22484	6.75527	2.61025	19.0582	260.475	36.8513	137.051	289.325	43.5592	447.317
p__Euryarchaeota	s__Halogranum_salarium	4.47224	115.038	50.0178	328.908	13.29	879.926	8.21467	1080.67	1164.35	4.69608	849.318	182.803	42.6877	19.5938	353.516	506.709	1139.16	6.77108	8.38935	5.32433	659.203	6.80695	51.298	4.11206	527.477	2392.11	45.533	11.6308	9.83037	5.57123	20.2854	342.567	45.7742	137.785	321.392	48.0453	471.566
p__Euryarchaeota	s__Halolamina_pelagica	0	47.273	9.06078	3.36301	0	1195.25	1.3046	3880.51	484.95	1.13062	47.4692	68.4947	1.79922	7.86406	6.05906	41.3939	489.463	3.66291	0.813178	1.12027	451.981	2.71697	6.11877	2.54608	469.937	1236	8.61942	0.946498	3.73129	0.262575	6.25232	13.3336	6.15469	4.73697	85.3927	3.12334	6.3779
p__Euryarchaeota	s__Halolamina_rubra	3.62125	57.699	6.93615	5.11011	0	1197.49	0.195638	4362.76	453.677	2.57621	44.9185	87.6849	2.88735	7.28027	7.7459	30.588	594.424	1.30977	1.58477	0.582101	525.369	0.733696	4.39814	5.6931	493.323	1319.13	13.2639	3.53206	4.14397	0.903433	10.0821	19.3938	0.775086	5.98219	88.4291	8.46641	5.78813
p__Euryarchaeota	s__Halolamina_sediminis	0.313378	42.8815	15.4639	6.38321	0.677861	1407.42	1.33046	4602.78	517.133	4.94291	36.5396	78.7767	4.36777	5.86103	9.40854	41.2506	533.231	3.61798	0.276053	0.282735	400.016	2.70385	6.97378	0	459.815	1043.76	10.0411	2.65455	0.812242	0	4.87313	21.2832	5.90917	4.88572	66.977	2.70346	9.89722
p__Euryarchaeota	s__Halolamina_sp._CBA1230	1.68575	72.6016	8.21666	7.02955	2.12745	1595.65	2.59096	4963.58	815.519	2.71966	74.4165	126.65	3.0684	9.8204	9.32068	32.2094	692.752	6.15285	3.95861	5.6172	646.307	3.75199	8.06354	3.58563	688.353	1669.36	15.524	3.25179	1.53992	4.03079	13.0074	21.1701	6.55335	5.26228	119.296	4.88863	8.84161
p__Euryarchaeota	s__Halomarina_oriensis	9.57217	257.975	22.7523	15.394	6.22321	1859.73	10.2594	2561.52	1659.3	6.00386	550.075	56.2545	8.73048	37.038	36.7693	122.885	299.975	8.86417	6.00931	4.77872	1767.4	5.41265	13.7886	18.8321	1458.97	5139.44	28.0861	20.5907	13.5622	2.13997	23.2438	197.833	37.4452	21.8182	831.052	58.6458	52.4971
p__Euryarchaeota	s__Halomicrobium_zhouii	2.76675	134.503	28.2651	11.3325	4.64478	1641.68	3.16682	2124.85	895.363	0.9852	105.469	28.2632	4.21574	13.8836	20.8512	106.32	139.519	5.18578	7.82427	1.23227	1299.67	13.7771	5.49241	1.08073	692.178	2897.39	9.68403	5.49646	6.07216	4.07641	29.7513	67.8937	23.5779	12.3281	424.862	16.0942	27.3243
p__Euryarchaeota	s__halophilic_archaeon	5.15606	236.968	41.2698	18.1038	13.2402	1679.75	8.78539	2806.25	7551.15	9.32449	172.667	69.0487	18.1551	17.9885	37.6826	151.338	216.441	11.2202	3.04117	7.76303	2528.96	14.6048	14.4929	7.18671	1025.36	5000.18	32.829	53.1815	16.439	20.1482	45.3583	85.6429	43.1359	35.8227	518.801	40.9512	55.509
p__Euryarchaeota	s__halophilic_archaeon_DL31	1.16363	362.547	33.8504	18.2831	3.61727	5611.2	1.77574	7183.37	648.193	13.1282	326.424	1176.05	22.4982	42.8537	33.195	164.228	3751.74	9.46255	1.42174	0.848834	2285.51	8.152	48.3172	9.72753	4242.74	3837.6	103.423	6.68367	21.4277	6.47414	16.2891	135.53	22.6014	24.9588	307.902	15.9903	43.6966
p__Euryarchaeota	s__halophilic_archaeon_LT46	0.485669	135.166	24.0989	14.755	7.21685	1269.74	5.80259	2004.86	1152.39	1.1104	126.018	49.93	7.62596	13.0962	18.6733	122.16	128.151	15.8305	4.79043	3.1991	1692.55	19.6839	11.2023	2.60483	689.956	3583.48	16.5776	11.5046	6.97627	7.47773	25.8069	50.8758	21.1951	20.1464	285.306	33.9025	28.5443
p__Euryarchaeota	s__halophilic_archaeon_NEN8	6.01653	99.6773	19.0626	16.2279	3.25209	1365.25	5.16316	1853.39	824.692	2.66854	69.7969	41.6781	6.72786	15.6287	11.8838	63.4552	154.509	2.72536	1.11063	1.72196	1294.53	6.66532	3.51978	5.22155	674.402	3393.64	15.8372	2.14951	6.11404	3.96483	31.694	76.3339	27.0703	17.4556	235.832	15.1427	27.0474
p__Euryarchaeota	s__Haloplanus_aerogenes	0.534388	171.572	38.5827	11.8503	0	3775.22	3.87818	3907.69	1301.22	4.65765	201.531	39.4249	3.66103	18.562	33.0051	145.97	179.152	3.51233	0	1.22765	1888.65	8.83121	6.74344	0.71165	1934.8	6806.56	14.407	13.1644	6.72055	4.79683	28.1281	52.2393	18.8544	11.6375	400.619	20.7733	25.59
p__Euryarchaeota	s__Haloplanus_natans	0.762473	84.4024	13.961	5.14628	2.84601	1766.64	2.50171	1688.25	707.648	2.62908	70.4973	21.5853	1.70378	11.1889	12.3818	82.3597	75.1229	3.63844	2.72212	0	803.37	4.51126	1.5998	6.7493	549.154	2566.81	9.46297	2.43069	2.95387	2.7155	17.221	33.6275	3.59608	8.50853	172.347	14.1178	7.48862
p__Euryarchaeota	s__Halorubellus_sp._JP-L1	0.339492	100.686	16.7285	12.8483	3.26111	1066.28	3.44239	4263.29	1123.42	5.27845	126.875	57.8348	3.97346	23.2016	17.3492	92.4173	142.51	10.2724	3.31864	2.3049	833.487	6.66084	10.1249	12.9928	677.45	10387.9	22.0985	13.8181	7.70973	4.78229	17.4189	52.6683	16.5747	23.5243	399.332	13.9021	23.5554
p__Euryarchaeota	s__Halorussus_salinus	2.05724	70.407	23.0536	16.2396	2.82045	598.386	0.733992	890.207	4228.31	3.38737	43.1845	28.2288	4.88183	7.59835	10.0603	79.0135	65.6253	1.8881	2.11804	0.658804	793.978	5.49888	2.42403	0.715091	341.156	1615.73	13.2942	5.20644	1.36475	3.86938	14.116	31.5459	13.3615	13.802	188.493	10.2253	26.0077
p__Euryarchaeota	s__Halostella_salina	0.754463	113.26	11.266	6.21244	3.00006	1020.36	1.06938	1540.21	576.293	3.15427	41.7723	35.7073	4.3864	14.7363	8.10742	54.1573	79.1515	2.89111	3.54575	0.638198	1398.58	3.31759	4.94536	0.518881	527.579	2675.68	7.96636	4.10168	6.63347	2.84539	19.3391	32.7986	9.65065	5.92922	214.157	12.273	13.3381
p__Euryarchaeota	s__Natronomonas_sp._CBA1123	2.19716	167.905	33.783	19.1373	3.74749	11894.7	6.95162	6638.87	1344.92	4.60056	162.928	73.6666	9.39401	39.3206	25.0821	221.096	532.853	13.6186	1.38506	2.82349	5417.63	4.42561	7.09152	2.90404	1353.36	17504.8	24.6483	4.7689	6.40068	3.4154	28.028	222.616	40.2236	35.1321	385.213	34.0223	65.0472
p__Euryarchaeota	s__Natronomonas_sp._F16-60	1.93513	204.149	26.0483	9.9614	4.11626	3281.89	2.33046	3890.53	913.798	3.36949	117.535	70.5071	5.12223	45.6741	13.9613	170.236	359.083	1.23285	4.77539	3.32408	2813.07	10.0537	10.0071	5.86624	1579.11	13004.3	18.2882	5.71087	5.93419	2.10691	24.7701	172.745	34.9908	23.9755	450.092	31.1943	68.022
p__Euryarchaeota	s__Salarchaeum_sp._JOR-1	4.13144	101.096	13.4492	4.79434	0	1194.78	4.23934	3662.28	404.284	10.8935	65.4642	141.606	10.8601	14.7098	4.23585	32.9112	137.235	2.04919	2.7349	1.5543	844.683	5.60284	16.7166	0	1303.87	1476.59	37.4371	8.57549	5.31814	3.41127	16.9308	32.1196	30.9026	8.9778	202.229	5.06296	10.2696
p__Euryarchaeota	s__Salinibaculum_litoreum	4.85653	37.53	10.0423	8.37497	1.84939	1397.99	2.24354	1497.45	284.54	1.85268	34.6689	15.1588	1.47137	6.39134	5.50548	34.7369	56.762	4.05851	0.875794	2.21615	416.744	7.36074	3.66136	1.88245	531.189	4657.07	7.40875	1.73853	1.53741	1.49891	6.51016	21.1039	6.80037	4.59046	110.941	5.94711	3.06173
p__Euryarchaeota	s__Salinigranum_halophilum	5.20008	223.448	29.1841	21.0165	12.3799	3405.22	6.42543	2234.48	1234.6	10.3981	320.85	53.476	10.9773	39.3443	74.6504	541.866	240.096	14.9005	18.4277	10.4799	1730.79	12.9173	14.3013	19.3935	776.512	5671.53	22.8505	13.7799	15.8358	20.032	28.2342	118.323	32.0822	30.1618	449.538	27.4382	45.5526
p__Euryarchaeota	s__Salinigranum_rubrum	4.42348	208.776	51.2999	38.6344	18.3841	2905.23	24.9055	2093.01	1115.79	16.2119	221.021	53.241	16.5869	37.1545	56.1572	443.232	166.218	14.9581	6.48066	9.00978	1794.09	17.3311	23.8573	14.9679	713.761	4759.59	23.487	13.6452	15.1838	17.5343	44.724	76.7695	26.2273	31.4737	495.209	41.1388	55.5216
p__Euryarchaeota	s__Salinigranum_salinum	17.3873	244.015	53.8397	40.0378	23.364	3252.8	30.5863	2563.73	1307.09	24.7286	213.959	76.6029	24.7929	49.4409	38.3499	614.592	207.612	23.2076	19.9124	11.4409	2283.37	13.0559	21.8112	36.0236	866.313	5947.66	23.8839	18.6934	17.8819	11.8095	38.1955	104.141	34.5439	42.1519	678.568	35.4648	61.3097
p__Euryarchaeota	s__Salinirussus_salinus	1.01785	133.519	19.7066	6.95341	3.29842	1672.04	3.39861	2234.12	677.652	5.56328	40.6822	25.6103	4.55298	18.0045	8.65856	90.14	98.1564	7.87116	0.897652	2.77224	1448.95	6.59982	7.5278	6.19038	771.52	3916.57	8.55161	8.89144	5.51291	11.2106	27.082	34.604	14.0109	11.4631	286.446	25.3004	11.0358
p__Euryarchaeota	s__unclassified_f__Haloferacaceae	21.9283	176.055	37.3394	22.9424	17.2879	1353.76	6.83274	1856.27	923.945	13.7502	93.0531	48.7411	16.0677	33.4128	22.2479	104.562	156.322	24.646	13.853	22.4479	1454.64	21.9355	14.8974	10.33	669.319	2596.53	24.1949	31.5651	14.6981	18.0491	50.7449	66.9028	49.1509	28.5457	368.632	46.8754	38.5077
p__Euryarchaeota	s__unclassified_g__Halolamina	0.440422	58.5303	8.50978	3.64678	1.67926	1137.47	1.69518	4762.65	360.376	0	42.5587	84.1521	3.60233	8.64978	6.45241	29.2985	519.723	5.84836	0	2.71731	472.637	2.06186	6.07445	1.60489	486.682	1231.89	9.92037	2.95315	2.15494	2.34499	4.39225	16.0151	4.77134	5.51154	101.452	5.5564	12.4454
p__Euryarchaeota	s__unclassified_g__Haloplanus	3.04882	42.2394	5.80427	6.55675	0.663632	2425.43	0.258773	1933.81	556.048	2.40959	47.6334	9.159	1.36414	9.16257	7.71035	53.6216	52.4354	1.08069	1.81317	2.08951	450.116	1.63459	2.09107	2.99798	462.122	2324.67	2.67043	4.61692	2.22546	1.36019	8.19502	18.9005	4.30051	7.31086	98.4226	4.16068	3.84416
p__Euryarchaeota	s__unclassified_g__Halorussus	6.10709	183.329	31.6309	16.9291	7.47045	1489.95	4.73002	2351.27	1212.32	9.5477	85.7538	55.0229	13.7701	13.952	15.4878	108.245	128.198	6.10976	12.211	4.23563	2070.53	7.40075	10.7969	7.96892	804.093	3660.75	14.8491	11.9479	12.0944	5.86462	41.0968	68.0167	27.7847	18.0946	403.616	19.5927	23.8961
p__Euryarchaeota	s__unclassified_g__Halostella	4.78271	137.606	16.4703	11.2744	0.8564	1209.61	2.56659	2016.52	776.754	1.31872	66.2342	45.7389	3.6157	12.3424	9.80105	66.4366	140.584	4.57928	0.554023	0	1658.51	3.49686	1.5342	7.94902	788.361	3454.89	5.25861	3.27522	5.81266	2.50045	25.1155	47.4252	15.0659	10.1144	282.829	24.6728	18.3864
p__Euryarchaeota	s__unclassified_g__Natronomonas	0.561918	58.0192	8.94036	5.3605	0	1220.48	0.686739	2216.59	415.456	0.830498	51.9237	22.2941	4.33281	24.4044	5.03926	51.2747	193.202	0.466164	2.20081	0	776.954	0.796447	5.7897	1.82649	727.196	4571.83	6.73267	1.782	3.38492	0.289738	5.90815	75.2409	8.77694	10.3427	128.725	11.2091	14.42

## Sheet: nega_bact
phylum	speci	HK4	HK14	HK50	HK19	HK45	HK97	HK56	HK88	HK9	HK37	HK87	HK103	HK31	HK34	HK59	HK61	HK10	HK100	HK74	HK41	HK95	HK30	HK48	HK2	HK67	HK17	HK110	HK77	HK71	HK54	HK26	HK64	HK23	HK79	HK106	HK91	HK83
p__Acidobacteria	s__Acidobacteria_bacterium	145106	118508	147762	173731	123330	87772	89421.6	75807.2	89681.7	176515	19671.1	153086	158432	119157	13086.8	121603	104138	159417	119497	109573	75497.5	126000	139279	119775	183845	36685.7	98489.2	145061	222478	91753.8	114889	121588	143002	129982	104911	98923.7	109805
p__Acidobacteria	s__Acidobacteria_bacterium_13_1_20CM_3_53_8	756.43	239.928	313.028	989.242	860.912	190.512	330.086	119.238	202.573	1708.88	44.4547	632.401	695.471	410.231	43.1372	225.538	218.117	720.935	1519.25	886.268	156.122	242.239	382.655	1521.38	353.055	94.3242	298.321	712.038	698.552	815.654	116.229	228.787	342.622	241.982	227.651	146.011	268.409
p__Acidobacteria	s__Acidobacteria_bacterium_13_1_40CM_65_14	993.305	193.054	286.287	851.65	1165.12	140.745	630.469	125.01	136.657	1067.96	14.5177	848.501	1065.06	825.079	12.8729	267.405	341.041	1144.29	1000.39	951.726	132.988	336.535	827.409	956.177	505.24	65.3941	603.174	775.491	1062.95	425.761	214.851	240.126	772.904	501.643	128.715	174.693	151.986
p__Acidobacteria	s__Acidobacteria_bacterium_RIFCSPLOWO2_02_FULL_64_15	812.868	176.392	270.543	603.712	1165.76	130.409	542.847	133.523	87.2323	746.628	18.9496	618.787	875.24	703.682	17.8364	207.29	330.134	676.581	732.214	761.771	116.091	330.596	707.413	643.301	521.682	65.5015	399.918	668.65	741.315	339.767	207.671	194.047	680.259	481.026	117.55	134.525	106.577
p__Acidobacteria	s__Acidobacteria_bacterium_RIFCSPLOWO2_02_FULL_65_29	1657.79	347.522	537.669	1318.13	1658.79	217.257	1170.8	185.166	226.301	1598.69	48.2912	1153.48	1683.22	1388.29	43.886	503.976	614.424	1554.1	1761.61	1434.8	218.967	635.045	1390	1591.35	933.606	126.033	911.667	1387.37	1581.45	753.556	413.821	450.175	1266.1	1037.11	228.633	323.473	218.19
p__Acidobacteria	s__Acidobacteria_bacterium_RIFCSPLOWO2_02_FULL_67_21	1965.09	156.829	474.605	1237.79	3275.04	109.15	1300.21	111.558	78.0201	1901.49	21.5825	1615.28	2069.85	1649.05	9.35148	313.62	607.043	2150.06	2548.42	2547.34	81.4905	696.96	1848.95	2641.63	838.272	49.4929	898.286	1293.5	1770.36	899.332	338.233	367.288	1449.37	973.063	84.8527	261.883	95.9438
p__Acidobacteria	s__Acidobacteria_bacterium_RIFCSPLOWO2_02_FULL_67_36	5969.06	589.368	875.357	6934.07	12793.7	434.083	6056.91	460.167	349.847	5013.9	99.5717	5739.24	5991.13	2717.38	49.9821	908.233	2200.78	7096.57	6184.75	8098.32	378.095	908.679	4049.44	4298.84	1959.77	176.746	6071.57	4074.24	6271.1	2641.36	1458.98	1065.13	5060.63	6131.89	436.544	747.024	451.013
p__Acidobacteria	s__Acidobacteria_bacterium_RIFCSPLOWO2_02_FULL_68_18	2123.4	231.572	554.156	1788.05	2892.89	172.77	1207.01	179.745	99.0905	2126	43.9615	1528.33	2258.51	3004.49	18.7732	372.722	617.63	2055.13	2929.26	2577.95	162.783	729.989	2238.58	3026.75	890.779	117.988	854.812	1239.25	1717.06	936.378	377.036	427.739	1505.07	985.746	139.929	292.974	115.586
p__Acidobacteria	s__Acidobacteria_bacterium_RIFCSPLOWO2_12_FULL_66_21	593.164	84.1684	118.392	603.549	1046.24	56.8342	536.346	59.9102	46.2976	566.759	11.9802	535.357	574.266	323.551	4.76279	119.783	204.084	602.145	639.103	786.96	49.8885	130.208	429.114	475.545	236.206	22.9886	537.336	441.607	648.328	249.393	145.332	116.658	498.724	547.657	55.2289	85.6232	70.0394
p__Acidobacteria	s__Acidobacteria_bacterium_RIFCSPLOWO2_12_FULL_67_14b	6690.07	336.403	486.479	3400.12	3861.66	254.967	3687.65	227.623	205.715	4945.66	34.3137	2903.94	5362.35	2979.45	23.6188	2159.04	1028.05	5971.94	5374.74	6137.73	188.846	1205.02	3586.97	5595.73	1179.26	98.2699	2497.61	4561.81	6972.3	1688.37	530.008	650.155	2674.33	1742.11	196.771	480.169	230.48
p__Acidobacteria	s__Acidobacteria_bacterium_SCN_69-37	1628.86	280.467	677.286	1354.4	985.254	132.294	1883.28	122.358	92.8969	1345.16	24.9228	1227.97	1655.08	1261.03	16.4795	817.063	510.932	1400.83	1633.89	1432.86	106.294	1066.43	2006.31	1107.45	745.39	57.4262	1216.98	3667.6	2855.6	728.833	1183.19	668.521	1970.44	1591.14	111.123	1394.69	138.214
p__Acidobacteria	s__Acidobacteriia_bacterium	6112.68	3735.52	3609.02	5800.86	1731.15	2214.13	3090.08	3132.86	1673.91	8997.14	549.862	6053.18	5414.82	4447.05	1412.81	2507.09	2766.95	3298.31	2427.7	2503.51	2324.87	6702.37	7253.53	1039.99	6964.54	681.746	3991.66	7652.82	2315.16	3842.6	2891.61	5116.33	4992.45	3380.91	2228.27	3667.26	3856.1
p__Acidobacteria	s__Acidobacterium_sp.	2201.18	73.818	93.3768	1040.18	1147.05	59.2565	1248.76	55.2354	36.5775	1616.97	12.0297	857.423	1714.13	943.839	5.48525	782.89	289.229	1875.39	1728.12	2260.42	42.0901	375.445	1107.55	1941.8	322.309	26.6002	741.933	1543.77	2579.18	543.902	151.644	182.492	825.69	482.836	40.532	147.131	59.6085
p__Acidobacteria	s__Blastocatellia_bacterium	14137.6	2110.73	2744.06	15315.4	14480.9	1601.56	5107.59	1402.5	1705.3	28361.1	426.624	8474.08	12233.7	7552.52	404.729	2378.46	2343.36	11963.3	25811.9	13514.5	1570.55	2434.01	6456.89	27246.3	4018.55	1101.51	4577.66	11545.2	11425.8	13764.4	1506.59	2147.31	5886.45	2932.73	1620.09	1437.98	1951.66
p__Acidobacteria	s__Blastocatellia_bacterium_AA13	917.688	270.299	369.498	1353.05	979.795	256.506	380.227	178.935	245.145	1874.32	31.3379	854.769	1374.69	699.382	36.0177	322.006	227.914	723.312	1038.17	707.295	204.478	276.12	666.324	990.231	456.532	165.056	391.01	752.786	906.864	1046.33	185.007	287.753	658.771	392.229	234.468	142.999	298.491
p__Acidobacteria	s__Bryobacteraceae_bacterium	4614.28	1250.74	1285.57	3105.91	1873.41	698.187	2327.09	914.268	741.321	7797.97	532.412	2727.2	2839.43	2643.32	1691.91	1015.45	1433.88	3219.9	2124.22	3099.88	689.489	2191.51	3498.7	1293.49	2611.95	268.342	1993.89	4326.15	2216.11	1978.15	1091.31	1721.19	2062.97	1376.62	685.939	1229.41	1392.71
p__Acidobacteria	s__Bryobacterales_bacterium	5162.81	2337.71	2368.55	5040.26	2318.33	1259.21	2904.36	1622.22	1086.07	8298.86	333.173	4782.54	4453.78	3776.67	617.804	1724.66	2192.82	4710.76	3019.04	3143.33	1115.02	4408.63	5635.76	1555.48	4958.92	514.272	3384.9	6243.86	2532.31	3103.99	1934.73	3478.77	3661.7	2502.69	1165.91	2324.85	2378.11
p__Acidobacteria	s__Candidatus_Solibacter_sp.	2390.07	1053.91	948.2	2876.47	1486.38	522.16	1901.82	732.034	573.138	3739.45	205.758	2227.43	1965.45	1764.76	269.885	737.123	1295.51	2570.02	1580.49	1651.43	559.543	1808.17	2402.55	788.83	2369.83	224.679	1526.41	2801.32	1337.76	1495.14	939.93	1437.73	1638.78	1183.23	495.403	981.267	1025.76
p__Acidobacteria	s__Candidatus_Solibacter_usitatus	991.525	348.623	381.365	893.564	753.281	205.901	800.335	239.057	200.827	1334.44	52.0067	730.052	766.107	614.061	73.2785	324.537	386.06	906.554	713.889	704.011	193.278	555.542	956.053	589.315	716.181	79.9501	573.053	1173	728.12	505.356	277.872	515.705	650.317	418.289	199.232	321.136	337.331
p__Acidobacteria	s__Candidatus_Sulfopaludibacter_sp._SbA4	958.394	366.592	422.54	802.949	749.107	214.579	734.632	226.951	194.172	1488.09	46.8019	732.834	785.502	674.478	51.4758	339.21	349.002	779.292	611.318	659.453	186.217	621.271	887.461	386.381	765.084	101.143	544.747	1076.91	650.553	468.283	307.6	457.584	616.223	393.883	223.07	342.745	332.882
p__Acidobacteria	s__Luteitalea_pratensis	2911.55	474.324	545.916	2826.18	2871.53	539.768	2119.95	315.695	193.626	2243.12	58.2795	2354.48	2971.38	2172.06	45.684	1330.87	971.113	4057.79	3282.46	4150.05	172.427	772.989	2289.95	2571.05	5303.77	95.1613	3214.38	2629.5	3116.16	1122.1	2267.01	2266	2475.49	1471.89	200.567	1594.58	246.951
p__Acidobacteria	s__Luteitalea_sp.	5117.79	1552.06	2020.04	4737.56	6197.42	1109.76	3346.47	1090.28	1114.36	4962.04	179.086	4851.66	5602.68	4426.35	140.641	1672.42	2203.18	7943.99	5756.14	5200.74	1066.77	2280.39	4438.95	4580.42	3297.74	868.165	3714.66	4009.81	4890.76	2590.44	1753.51	1724.43	4551.41	3412.54	1234.46	1373.96	1113.34
p__Actinobacteria	s__Acidiferrimicrobium_australe	358.381	404.085	94.3271	381.564	409.216	160.776	584.888	93.9194	62.037	386.029	91.6138	190.958	314.313	984.292	64.8299	202.679	337.548	657.086	590.908	589.037	70.5185	251.813	350.268	1075.88	208.131	65.5521	409.905	241.634	459.913	1238.03	715.681	155.974	280.105	288.267	240.885	451.981	140.754
p__Actinobacteria	s__Acidimicrobiaceae_bacterium	9802.78	13719.9	5603.03	17415.2	8248.44	11287.5	26887	5840.99	2274.52	6554.41	6990.55	11007.1	11841.6	17815.4	3681.62	8540.69	14064.5	11971.1	8267.16	11433.1	7295.59	14532.7	13746.5	8053.52	6572.78	2520.27	26188.4	10873.3	13131	32512.1	28866.8	11219	13963.1	12844.2	8830.5	17382.9	21410.7
p__Actinobacteria	s__Acidimicrobiales_bacterium	3747.62	7965.14	2027.41	5324.28	5696.93	2444.89	8612.39	1562.64	1207.01	3196.51	3370.81	3130.4	3633.54	7321.73	1754.23	2544.98	4820.65	5139.5	4634.29	7239.31	1215.97	4997.34	4477.34	5738.54	2897.15	873.835	5541.02	4015.93	5060.52	15505.7	7506.56	2895.35	3859.47	4422.26	3712.43	5866.94	2285.1
p__Actinobacteria	s__Acidimicrobiia_bacterium	28188.4	28817.4	20196	29385	19920.9	14442.6	36149.4	20210.2	16653.4	22092.6	48731.4	22049.4	21604.5	34338.1	20330.3	16230.1	33731.2	33266	24310	25023.5	7571.83	35146.5	26210.1	20983.2	25765.1	7240.04	25833.6	35162	27479.8	44630.2	45154.4	24256.9	23175.8	32650.1	24257.6	37668.3	18707.4
p__Actinobacteria	s__Actinobacteria_bacterium	138989	51395.7	49452.5	92284.1	209625	26406.9	99364.6	36803.5	29104	134441	24699.3	82025.4	103447	250773	14082.3	40080.5	94274.9	196360	190436	201015	20053.1	115808	110751	284049	62246.9	23289.4	104773	134904	156551	172022	112762	44985.4	107045	113537	44953.5	74070.2	27386.1
p__Actinobacteria	s__Actinobacteria_bacterium_13_1_20CM_3_68_9	1121.45	129.393	524.139	648.804	2309.93	78.3189	618.838	111.102	151.418	951.595	30.3062	456.907	754.62	1256.62	17.4289	196.307	450.181	1186.85	1753.01	1677.35	73.743	865.013	1075.64	2817.93	227.746	96.0125	607.293	1020.71	1433.57	1112.23	645.087	127.965	884.964	957.87	411.285	533.548	108.294
p__Actinobacteria	s__Actinobacteria_bacterium_13_1_20CM_4_69_9	635.636	20.8335	37.9391	209.264	1222.4	27.7097	320.128	45.3879	22.8391	685.492	7.53651	296.64	492.089	860.697	4.79382	12.52	206.848	634.877	970.008	962.256	17.6941	272.025	458.511	1310.75	102.683	27.3793	402.334	503.513	690.753	570.135	107.401	25.9616	453.008	294.177	26.3693	33.8193	14.7879
p__Actinobacteria	s__Actinobacteria_bacterium_RBG_16_67_10	1006.63	113.27	151.091	909.905	1430.04	69.7158	1148	120.079	96.1825	1258.88	120.704	696.452	660.212	1670.5	183.283	145.208	540.41	885.938	954.56	1216.45	59.1911	458.727	802.575	1409.69	473.889	85.4525	705.153	957.806	1350.74	1173.55	363.984	335.621	1011.31	888.439	50.9746	152.141	196.568
p__Actinobacteria	s__Actinobacteria_bacterium_RBG_16_68_12	3585.69	164.123	139.255	3055.73	6271.64	149.332	3710.11	306.231	130.743	4476.39	81.8634	2489.91	2316.01	5972.45	40.6584	65.2521	1698.84	3366.28	4030	5135.47	186.313	1060.2	2522.41	5855.05	995.678	298.153	2527.5	3325.49	5282.34	4459.58	630.97	223.579	3212.65	3066.11	124.95	206.437	81.6517
p__Actinobacteria	s__Actinobacteria_bacterium_RBG_19FT_COMBO_70_19	1032.5	350.423	134.197	852.94	2923.28	115.49	1322.84	199.178	95.0589	1117.49	76.1716	587.539	701.166	4286.13	48.3763	155.581	3635.93	2249.64	1918.8	2568.35	152.207	569.105	1228.87	2981.17	937.476	188.513	932.877	664.33	874.261	2292.25	803.603	545.879	1185.76	8966.59	89.7066	319.805	94.4194
p__Actinobacteria	s__Actinomyces_sp.	353.503	966.69	392.986	518.222	579.489	348.87	804.82	218.557	143.132	315.552	315.835	363.242	416.386	694.081	181.366	299.871	602.443	560.325	492.433	739.697	269.249	674.208	473.415	599.53	364.91	175.29	628.24	325.006	442.068	1676.2	980.161	363.372	427.704	524.94	526.354	777.522	319.235
p__Actinobacteria	s__Actinomycetales_bacterium	668.453	254.069	202.829	483.078	672.882	154.756	713.151	179.56	136.317	370.417	270.789	625.084	667.423	783.546	229.103	325.056	477.589	1136.65	1206.49	779.947	159.513	329.857	499.22	1186.84	331.697	94.5258	1085.77	401.43	453.423	661.191	865.011	292.543	688.893	636.915	260.433	735.519	206.524
p__Actinobacteria	s__Actinophytocola_sp.	642.319	648.319	208.719	463.137	1089.83	335.052	667.601	443.265	135.126	601.035	1690.12	451.485	486.704	1272.21	222.699	347.36	592.251	1179.89	1049.86	1521.62	369.264	511.648	568.168	1308.55	448.174	318.915	947.852	493.759	730.708	1041.58	1099.63	506.435	592.704	540.596	725.447	1303.21	186.323
p__Actinobacteria	s__Agromyces_flavus	2426.67	16.546	22.5068	201.912	201.46	11.2507	688.326	50.771	8.93638	360.671	13.1074	132.547	159.766	195.608	7.42295	28.0209	231.073	87.8158	1273.55	2399.39	13.4586	229.194	166.67	544.818	240.617	15.7702	628.935	978.709	642.526	658.444	97.4402	41.7013	243.62	145.684	28.5566	30.9737	15.3404
p__Actinobacteria	s__Agromyces_sp._NDB4Y10	1577.52	8.07051	16.5926	486.805	198.208	13.3372	903.727	41.1593	11.3832	220.02	11.2748	181.856	309.342	467.897	6.53515	23.5781	284.378	124.225	581.712	1539.86	11.8086	277.252	210.331	322.446	113.818	13.0387	568.044	1914.01	813.601	430.459	173.352	54.0184	272.587	258.439	9.33611	21.9232	28.9927
p__Actinobacteria	s__Angustibacter_sp._Root456	482.189	60.5682	39.1098	436.971	630.208	33.3734	345.571	49.8385	38.1855	335.621	139.954	564.027	634.017	834.016	86.4582	217.582	206.411	1330.66	1070.68	756.394	31.8766	91.7747	486.934	1209.41	176.558	31.2769	881.536	117.749	311.391	386.276	438.709	118.468	611.382	513.912	69.74	507.441	26.1586
p__Actinobacteria	s__Baekduia_soli	1123.67	122.039	112.087	352.28	2454.18	68.4089	817.705	119.855	52.2118	1265.46	39.4293	474.765	617.312	1138.87	23.1254	163.961	405.081	1572.62	2944.37	3041.8	83.0506	411.231	701.097	6780.85	170.187	78.4485	944.515	823.336	1389.1	1171.43	983.521	144.532	624.032	497.791	102.864	551.242	73.7246
p__Actinobacteria	s__Blastococcus_saxobsidens	374.243	200.675	64.3165	255.228	561.946	93.8939	278.714	118.793	46.6131	366.341	90.9378	274.261	359.375	402.855	67.1396	214.79	201.572	700.016	906.603	770.916	78.3858	133.228	271.275	1073.31	296.764	71.5821	758.771	126.242	326.164	369.038	966.433	441.895	345.589	265.276	204.874	474.598	75.5182
p__Actinobacteria	s__Blastococcus_sp._CT_GayMR19	1320.54	74.4773	31.6492	268.315	3383.66	44.4231	671.315	296.757	28.7112	1551.1	45.3541	504.898	700.776	430.078	42.6603	176.188	325.628	1308.56	6019.32	5881.66	132.342	88.2673	507.531	6430.7	241.087	97.1634	1644.15	129.822	713.477	1049.12	827.129	332.292	840.681	251.827	35.3079	465.575	32.4493
p__Actinobacteria	s__Conexibacter_sp._Seoho-28	457.388	86.3568	50.681	160.374	909.627	42.8565	411.082	62.2452	25.0643	544.275	19.7673	210.086	270.397	534.071	10.1127	93.5008	144.102	892.041	1257.5	1113.08	48.1052	177.472	322.587	4264.63	67.6413	27.3984	404.787	314.052	671.813	518.655	582.301	58.2593	305.94	200.269	67.8451	301.091	20.7033
p__Actinobacteria	s__Conexibacter_woesei	2079.14	254.863	506.227	640.796	4186.7	153.037	1260.32	248.154	154.028	1907	78.2086	850.965	967.542	1684.96	39.3916	1019.04	670.568	3023.16	4663.35	5153.79	145.332	946.479	1013.91	9278.56	310.784	148.722	1535.1	1448.3	2966.88	2335.74	1311.65	395.968	945.389	932.747	403.998	907.071	124.185
p__Actinobacteria	s__Desertimonas_flava	2335.18	1150.73	421.461	1470.63	3830.43	381.853	3686.06	272.576	215.511	1389.65	414.557	1567.13	1486.02	2014.3	192.766	485.972	1333.65	1486.91	3024.54	4723.63	168.372	1636.64	1557.02	1965.93	636.332	149.465	1935.12	3284.7	3337.46	4150.28	1384.97	625.397	1460.53	1255.47	629.042	1109.52	352.014
p__Actinobacteria	s__Frankiales_bacterium	958.345	326.884	105.045	812.071	1031.15	137.696	1156.73	196.758	44.0371	863.298	154.798	517.178	1104.91	8270.35	70.0936	369.851	424.399	1936.28	2772.07	1152.58	242.347	1039.75	1218.33	3300	618.316	120.132	1917.24	354.943	1132.5	881.727	1780.24	345.662	845.973	467.715	164.857	768.152	133.301
p__Actinobacteria	s__Frankiales_bacterium_YIM_75000	930.134	223.69	44.4318	1156.32	1516.41	83.028	702.212	79.6744	50.3792	805.77	314.001	879.576	948.856	2322.66	51.9685	141.21	511.369	2748.83	2495.17	2017.68	61.8324	166.963	1334.39	2745.64	259.589	69.9771	1622.5	214.557	689.379	1069.14	1023.15	133.345	1080.33	522.227	150.637	407.869	30.5038
p__Actinobacteria	s__Gaiella_occulta	7624.39	203.145	253.286	2212.02	8227.65	192.835	6415.73	416.978	130.657	6660.09	72.2298	3146.88	3833.64	6902.74	44.8936	138.416	2394.98	4905.1	10700.2	10985.4	209.046	1503.63	3790.59	14135	858.015	277.549	3583.8	10595.5	10492.8	6701.99	806.553	320.357	4092.13	2521.28	137.686	322.429	94.4241
p__Actinobacteria	s__Iamiaceae_bacterium_SCSIO_58843	1590.94	5808.31	693.293	2066.59	3006	1419.83	4895.9	589.381	279.914	1339.22	1139.95	1547.37	1867.29	3049.72	723.537	1250.79	2414.41	2222.28	2079.44	3817.5	543.747	1955.58	2039.69	2429.18	1284.83	406.398	2564.83	1736.51	2636.12	10579.6	3932.8	1150.62	1776.46	2509.86	3021.52	2494.02	1115.3
p__Actinobacteria	s__Ilumatobacter_coccineus	577.68	224.138	195.247	917.42	343.098	141.358	849.343	132.637	60.6739	313.243	470.107	435.742	546.51	782.351	164.173	276.978	378.518	476.214	467.409	598.394	90.3056	829.013	659.963	401.315	180.633	48.6948	853.692	671.207	671.3	548.83	581.887	357.67	491.214	416.588	185.058	515.074	209.878
p__Actinobacteria	s__Ilumatobacter_fluminis	4913.06	553.179	1318.14	6304.73	1327.75	403.991	9855.11	404.123	297.661	1732.55	3856.24	3178.04	4558.31	4061.57	367.391	2315.25	2402.45	3135.74	2016.26	3544.04	147.176	6557.96	4834.95	1180.4	928.312	140.454	7026.58	6526.3	6714.09	2272.67	3657.26	3035.93	4829.14	2885.1	419.388	3679.83	673.623
p__Actinobacteria	s__Ilumatobacter_nonamiensis	499.976	381.636	248.896	822.558	389.57	219.087	842.372	199.125	108.702	255.5	447.832	428.007	489.08	593.365	183.374	292.417	398.112	394.082	435.503	569.605	130.032	910.372	535.575	251.214	239.349	73.0076	851.888	750.424	714.285	638.938	699.797	352.907	467.234	444.42	284.377	522.305	250.316
p__Actinobacteria	s__Ilumatobacter_sp.	4598.07	1304.3	1393.86	5284.84	3623.04	745.052	6366.91	630.469	387.863	2501.46	2224.29	3354.99	4025.58	4746.31	596.903	2004.64	2489.77	3449.15	4061.09	4824.08	418.424	6724.71	4376.79	2809.65	1226.17	302.509	6093.56	4901.94	5493.91	3638.7	4055.63	2766.94	3744.04	3147.1	820.473	3741.56	961.731
p__Actinobacteria	s__Marmoricola_caldifontis	1546.25	86.6359	118.613	772.668	1625.14	61.6251	2343.19	97.0057	64.448	1103.3	1237.55	854.633	1228.89	1933.38	1539.18	208.567	458.607	1544.04	1933.72	1332.97	46.2523	274.989	946.627	2086.36	393.588	74.8946	3003.81	662.268	1335.72	1229.13	2237.38	241.01	1135.27	802.208	106.975	633.821	131.05
p__Actinobacteria	s__Marmoricola_pocheonensis	1078.7	95.7771	99.8105	874.896	1241.17	77.1455	2675.96	65.4381	30.577	474.497	410.362	663.357	990.03	3506.69	514.974	84.4209	668.404	1142.9	1182.03	1066.05	26.5745	5555.94	1169.67	1023.39	193.504	48.309	1594.02	479.475	744.333	1972.54	1212.87	204.642	1206.98	635.393	90.3715	273.448	84.2189
p__Actinobacteria	s__Mycobacterium_gallinarum	1956.19	64.4869	31.473	75.1105	1037.92	143.499	1022.91	30.0447	19.5322	525.944	30.4092	911.295	913.767	237.746	5.61501	23.9905	104.251	291.256	1296.15	1780.05	20.8478	510.569	807.397	839.934	30.9003	41.0677	1011.42	1535.07	1703.58	783.636	80.6501	14.9744	1448.18	460.518	30.3274	23.5185	14.5738
p__Actinobacteria	s__Mycobacterium_sp._KBS0706	508.186	419.256	450.849	474.654	466.535	314.298	276.004	201.959	301.21	645.96	97.9232	726.963	553.211	513.229	76.1981	318.429	492.361	382.982	380.303	418.996	168.87	822.709	897.396	180.615	389.305	139.472	654.507	416.734	383.547	504.697	455.851	297.001	579.818	485.384	148.839	322.252	245.159
p__Actinobacteria	s__Nitriliruptorales_bacterium	1620.43	2871.18	1513.22	3794.48	5113.3	1212.48	1172.36	1744.73	1025.07	1632.4	508.939	2167.54	2476.46	6000.72	246.163	4791.28	3005.05	5192.74	2289.5	2155.71	1676.85	3257.42	3710.69	2841.86	2938.94	1298.94	2954.21	3097.95	6105.73	2318.04	4893.59	2154.03	1941.83	3574.35	1958.63	9007.5	847.666
p__Actinobacteria	s__Nocardioides_alpinus	781.554	7.79853	7.03894	335.351	628.534	15.1379	383.952	26.6193	4.44256	313.785	33.0334	228.824	635.915	495.655	27.7871	42.4655	69.7513	1120.41	1283	977.448	11.8565	288.684	289.647	713.894	26.8261	15.2336	1011.24	309.092	562.415	782.04	261.137	48.1622	384.124	121.648	10.5867	109.918	7.08191
p__Actinobacteria	s__Nocardioides_eburneiflavus	1774.63	29.501	46.2612	660.751	918.039	33.6838	1124.15	89.9213	15.2843	632.909	88.2661	508.761	1695.14	1048.75	96.3953	265.696	164.297	2097.13	2074.82	1808.79	21.6534	596.548	914.394	1618.71	114.942	24.5809	2728.85	691.589	1231.88	1529.77	1810.04	314.91	1107.84	384.98	42.2275	666.648	31.8165
p__Actinobacteria	s__Nocardioides_euryhalodurans	2249.61	85.6731	86.2867	607.181	1331	46.6875	1463.85	78.1116	55.0496	900.29	392.372	459.843	908.38	1021.19	454.933	245.433	288.174	1397.18	3059.52	2728.38	47.9612	541.988	607.767	2362.81	169.432	42.518	1761.7	2986.48	3002.08	1748.69	1657.99	134.605	858.951	385.293	94.506	727.72	59.1286
p__Actinobacteria	s__Nocardioides_ganghwensis	2538.33	35.9501	49.4216	1230.03	1392.17	55.7489	2375.96	135.125	21.0872	1074.87	209.516	830.194	3483.66	1810.17	240.128	628.407	239.786	3460.6	2804.65	3063.38	40.2991	903.91	2137.97	2376.07	227.389	48.0204	5560.97	1035.72	2046.95	2414.25	4187.28	766.781	2252.22	834.192	85.7617	1509.28	53.9763
p__Actinobacteria	s__Nocardioides_gansuensis	889.639	81.1996	61.2831	409.603	804.766	38.4124	748.773	94.8827	35.3835	444.58	254.835	336.781	535.612	926.541	275.891	112.793	212.038	923.657	1466.92	1185.68	38.81	379.615	440.274	1427.84	133.605	34.3832	1242.64	419.911	699.27	816.345	709.61	109.593	554.803	289.775	95.2528	431.507	45.5228
p__Actinobacteria	s__Nocardioides_guangzhouensis	1438.4	210.905	135.482	647.219	1369.27	72.1155	1705.47	109.28	58.1932	956.569	871.541	643.297	855.943	1796.28	1058.06	121.484	459.138	1154.86	2175.84	1773.1	52.8721	440.941	940.766	1921.85	296.952	99.5001	1671.2	931.339	1460.62	1310.02	695.251	177.243	827.266	573.492	218.286	526.913	102.782
p__Actinobacteria	s__Nocardioides_halotolerans	687.178	36.3586	46.7497	599.253	611.544	26.4857	709.948	40.8243	21.8305	281.079	58.4501	309.712	590.623	626.604	67.6285	53.6663	195.924	682.082	762.153	742.858	15.9024	1089.57	427.801	553.089	56.4835	27.3475	605.072	418.923	652.105	492.96	1840.48	87.6067	475.092	300.813	40.8754	151.644	20.7423
p__Actinobacteria	s__Nocardioides_immobilis	817.655	72.8354	48.3493	301.952	423.15	34.7419	429.104	48.4622	26.0378	456.966	125.342	253.006	440.084	1819.01	133.841	126.716	151.376	626.502	1804.95	788.871	22.354	433.072	413.671	1291.82	89.7767	32.4561	814.99	318.521	488.067	638.984	457.665	148.459	354.042	146.867	54.0992	1279.35	53.579
p__Actinobacteria	s__Nocardioides_iriomotensis	8116.83	172.157	651.516	4513.92	8314.3	156.346	15586.4	342.848	204.486	5708.76	7745.16	4840.64	5788.36	12216.9	9761.1	275.663	2306	6920.88	9553.2	6307.44	104.74	1023.58	5578.08	6626.45	1725.85	166.134	14668.3	1740.17	5397.87	7274.13	4176.16	679.709	5422.25	4245.47	235.171	1790.71	597.485
p__Actinobacteria	s__Nocardioides_sediminis	716.628	53.8106	36.8346	247.349	560.079	21.7201	865.643	28.9864	12.2928	371.709	194.329	204.175	362.984	474.891	271.813	51.053	154.23	450.725	985.378	914.452	13.3368	186.396	302.514	1191.73	96.9642	19.2375	852.867	430.658	782.752	581.043	328.552	66.1048	379.689	210.89	36.0212	189.523	36.8517
p__Actinobacteria	s__Nocardioides_sp._HDW12B	1023.29	41.8676	72.5285	886.946	887.616	24.3781	1559.81	59.0833	23.7449	594.487	608.466	503.056	712.775	1065.73	779.366	329.736	274.349	1066.92	1282.04	1145.99	26.8454	237.032	600.452	1640.18	182.052	28.334	1438.01	715.164	1548.88	781.26	1122.08	148.568	667.441	558.597	50.512	361.064	71.6446
p__Actinobacteria	s__Nocardioides_sp._LS1	1100.28	27.0304	44.9853	352.239	808.719	18.5757	1004.38	35.0052	15.3001	568.036	438.437	318.588	497.501	918.865	531.002	62.4539	197.808	676.867	1541.94	1900.92	19.9811	338.238	433.144	1043.01	125.413	18.3804	1013.09	860.427	1220.48	1145.45	594.863	83.2344	422.537	294.246	32.5472	251.338	32.0032
p__Actinobacteria	s__Nocardioides_sp._SZ4R5S7	578.2	60.6017	51.9513	263.066	572.531	23.1737	830.765	40.115	15.2284	330.66	368.842	248.817	339.794	636.163	492.008	64.3859	170.203	477.365	775.969	759.892	20.1287	194.53	338.517	691.447	118.187	23.8796	767.022	341.218	522.308	581.282	487.787	71.2516	346.797	226.444	73.273	249.314	41.2261
p__Actinobacteria	s__Nocardioides_sp._zg-1230	5663.22	32.7794	38.2854	612.132	1546.24	38.2428	3245.52	91.1136	28.027	1436.15	161.132	553.132	1894.45	753.107	174.455	184.118	203.371	1596.18	4110.3	6445.8	34.1906	1254.61	612.199	3833.65	121.554	44.6155	4306.74	3823.1	6522.52	2416.38	1190.15	225.272	1682.91	398.057	54.2141	395.611	49.8781
p__Actinobacteria	s__Nocardioides_speluncae	739.173	97.4845	60.7205	256.633	652.347	40.9573	809.274	44.2546	24.4819	458.746	439.957	310.981	369.232	939.891	575.247	58.2878	208.217	573.785	1154.39	859.799	15.6295	218.303	442.718	1026.87	130.096	22.4864	891.882	377.334	593.47	796.411	365.19	93.3899	408.263	263.933	64.7728	292.763	45.6934
p__Actinobacteria	s__Promicromonospora_sukumoe	1067.04	43.9208	366.589	871.449	730.908	26.1134	596.894	56.5304	12.2687	3426.02	53.9033	318.267	699.825	320.34	18.0895	55.3466	74.7445	1489.54	2299.75	1812.51	20.3235	89.1044	1074.63	127.314	31.244	18.3331	1004.47	146.229	148.722	894.05	216.443	225.158	113.349	96.5153	36.2361	228.821	10.7814
p__Actinobacteria	s__Propionibacteriales_bacterium	1261.48	902.728	404.098	827.985	1959.68	234.849	1888.95	346.472	231.593	1022.21	830.838	922.869	891.701	2207.41	867.99	272.215	1113.81	1616.91	2102.6	2323.35	268.86	677.954	1068.61	1690.15	730.886	372.846	2087.65	618.307	1025.22	2006.6	1303.95	399.512	948.149	1001.89	1016.22	1545.27	204.762
p__Actinobacteria	s__Pseudonocardiaceae_bacterium	391.799	557.848	194.986	453.035	554.715	212.609	350.047	307.908	126.944	385.65	192.295	294.306	345.105	1100.06	104.613	472.412	429.858	924.272	745.899	668.708	311.624	318.989	424.704	1406.26	301.058	292.028	531.117	256.861	372.585	758.257	941.105	298.257	375.151	351.145	520.247	1140.54	129.23
p__Actinobacteria	s__Pseudonocardiales_bacterium	727.802	629.202	263.216	635.87	1161.55	230.293	714.694	173.003	156.389	660.267	296.134	500.079	599.63	1701.19	131.807	267.085	541.154	1457.09	1384.2	1380.86	150.903	727.274	740.849	2350.95	361.301	149.28	994.696	481.519	653.715	1186.24	988.205	271.571	627.681	552.981	399.194	770.331	143.886
p__Actinobacteria	s__Rubrobacter_sp._SCSIO_52909	596.739	225.134	263.234	322.83	1984.52	222.967	334.102	269.391	256.794	1209.11	95.8285	385.22	376.926	464.698	87.575	201.553	351.196	1137.25	1466.79	1761.75	282.302	311.579	438.803	4166.89	389.848	344.636	486.897	305.581	414.489	497.515	751.353	211.538	376.844	515.616	276.368	1449.97	260.439
p__Actinobacteria	s__Rubrobacter_xylanophilus	385.507	218.514	199.156	286.61	1142.13	280.233	314.896	254.117	207.549	553.273	73.8656	326.258	352.475	377.422	68.24	194.7	288.676	572.181	576.964	744.012	351.891	288.725	311.431	962.418	317.453	351.769	348.327	342.708	387.544	371.281	542.043	197.337	368.468	407.888	286.677	823.853	189.335
p__Actinobacteria	s__Solirubrobacter_pauli	5023.93	132.23	175.017	723.206	8417.02	101.112	2166.15	277.4	82.4402	3361.87	104.038	1641.09	2195.37	2095.65	53.1218	229.455	736.175	2876.19	12623.5	16148.6	106.387	633.045	1633.26	13829.7	315.541	106.623	3164.83	3721.27	6681.99	4248.78	1057.53	238.676	1627.67	1110.12	138.146	880.913	80.1297
p__Actinobacteria	s__Solirubrobacter_soli	6855.48	148.629	210.724	973.143	12325.5	139.058	3009.66	379.057	107.446	4781.48	111.797	2481.9	2557.76	3024.56	57.2759	258.452	1128.08	3777.96	17990.7	19268.8	160.729	852.577	2168.79	17921.4	463.04	145.749	4460.93	4189.5	7610.65	6062.09	1062.68	346.357	2126.45	1449.31	125.002	784.204	109.4
p__Actinobacteria	s__Solirubrobacter_sp._URHD0082	7007.87	174.2	274.647	982.504	13174.2	169.744	2859.84	468.211	127.277	5461.37	98.9569	2405.28	2223.3	3940.31	68.9193	260.095	1242.59	4250.63	19557.3	22147.7	211.229	1023.02	2594.16	19842.5	529.646	186.336	4906.6	3019.47	5933.04	7391.69	1218.87	375.099	2153.41	1618.58	217.692	802.656	106.032
p__Actinobacteria	s__Solirubrobacterales_bacterium	6921.33	1004.8	3202.02	3701.61	18320.3	629.743	4996.36	932.106	942.206	7437.83	286.977	3383.56	4756.3	5886.72	156.588	1510.13	3024.02	8976.48	12799.2	16836.4	487.413	5272.43	5247.61	24405.8	1352.12	636.199	4500.67	7866.36	15949.2	8785.58	5982.5	5816.94	4787.26	6053.41	2003.91	7270.68	842.829
p__Actinobacteria	s__Solirubrobacterales_bacterium_70-9	1510.01	233.599	3221.99	422.351	847.253	131.552	357.916	143.815	667.236	385.89	49.0984	290.131	358.601	386.385	18.3581	596.206	280.281	547.219	932.086	1199.61	94.6757	4112.39	502.288	1209.5	173.614	167.169	289.996	1800.23	1640.41	995.207	743.69	170.365	366.392	499.262	1770.58	184.455	130.699
p__Actinobacteria	s__Solirubrobacterales_bacterium_URHD0059	1363.55	133.276	183.236	348.11	2906.06	72.1443	920.523	122.052	66.7503	1302.97	46.3505	552.424	587.892	1126.05	27.2923	116.243	411.212	1373.87	3506.78	4182.8	78.0169	537.732	719.552	6634.08	208.402	70.8445	1151.6	945.346	1542.54	1603.96	803.126	217.332	624.953	506.458	103.256	476.011	55.6407
p__Actinobacteria	s__Sporichthya_polymorpha	432.558	149.946	42.6771	380.678	357.527	85.799	509.624	53.0589	26.3159	384.087	136.853	214.363	429.451	2322.87	32.6876	119.889	171.826	1011.63	837.838	480.32	79.6559	204.761	672.112	1741.71	133.29	42.8852	610.875	188.576	380.609	631.826	874.095	111.186	362.079	166.963	88.5408	433.391	57.2763
p__Actinobacteria	s__Streptomyces_thermoautotrophicus	723.396	376.268	107.631	787.78	1247.02	121.168	617.271	149.529	78.0803	671.082	591.388	567.419	658.847	1714.07	78.5156	194.476	534.728	1971.87	1909.24	1604.99	125.848	400.855	957.699	2251.15	276.793	168.116	1158	217.442	579.005	1031.78	891.54	179.735	751.45	451.953	302.68	615.74	123.606
p__Actinobacteria	s__Streptosporangiales_bacterium	904.744	1014.36	405.535	782.161	1538.91	320.789	792.348	429.184	282.511	838.61	594.571	763.34	773.891	1603.74	131.438	383.341	956.232	1485.72	1527.43	1828.57	360.728	933.491	906.959	1840.09	666.277	408.9	1195.49	727.601	800.86	1486.01	1094.08	468.094	842.469	870.512	1043.14	1382.97	264.773
p__Actinobacteria	s__Thermoleophilia_bacterium	4293.64	161.086	134.422	1172.06	3569	110.725	3905.6	226.612	73.9832	3820.89	90.588	1468.73	1989.2	3919.19	77.4716	334.683	1432.48	2548.44	5523.92	5969	93.6013	776.205	2056.19	8120.94	593.901	124.878	2053.36	6882.54	5928.55	3377.13	953.968	331.492	2093.89	1217.84	77.8484	588.51	121.864
p__Actinobacteria	s__Thermoleophilum_album	596.031	46.2991	90.3559	199.306	2424.1	65.1859	494.405	100.693	34.8827	843.209	11.0835	305.837	291.382	460.057	10.3091	85.4033	303.476	1087.37	1286.44	2690.07	57.3571	251.116	345.231	2083.75	118.877	60.1705	480.68	576.457	1117.64	1051.11	309.535	169.258	302.668	444.065	89.4179	258.606	36.5389
p__Actinobacteria	s__unclassified_g__Nocardioides	3095.64	252.183	168.686	1100.13	2274.2	127.683	3115.42	170.092	66.033	1504.46	1064.07	1042.2	1706.66	3067.88	1303.98	305.179	654.305	2108.18	4646.41	3684.88	109.263	1171.35	1488.02	3563.21	454.392	94.5432	3451.04	1802.57	2713.39	2653.32	2107.13	405.855	1509.68	901.348	230.203	1596.17	186.495
p__Bacteroidetes	s__Bacteroidia_bacterium	683.089	341.498	436.895	482.702	229.485	291.008	453.851	193.789	307.114	378.023	759.228	485.046	494.587	221.718	979.051	585.866	338.291	553.394	457.649	827.269	312.791	757.825	380.733	210.427	416.539	171.562	410.942	1486.85	1176.47	310.539	691.18	384.804	493.529	393.947	416.223	190.163	432.529
p__Bacteroidetes	s__Chitinophagaceae_bacterium	1996.75	102.533	188.564	329.662	558.032	249.903	859.385	154.106	209.311	734.402	104.206	301.287	557.725	501.687	82.0238	336.978	177.46	927.121	1342.07	2226.85	135.511	318.514	470.975	746.132	290.446	186.052	648.768	3075.7	2865.9	416.078	303.42	197.325	391.723	269.372	315.418	162.21	123.322
p__Bacteroidetes	s__Ohtaekwangia_koreensis	483.836	19.58	42.3383	360.356	233.313	23.2828	752.988	24.6144	24.4801	303.173	22.173	462.7	749.653	244.234	20.0987	85.173	70.8443	748.157	491.487	2131.07	13.9179	1603.18	278.571	45.4206	76.1035	13.8335	801.366	3803.51	1880.89	570.117	1144.86	168.533	379.845	161.783	63.6074	81.2627	15.4906
p__Bacteroidetes	s__Pontibacter_russatus	527.765	21.2166	27.7385	141.623	823.767	29.37	630.697	42.2928	25.5601	617.514	10.7211	505.96	1719.34	201.615	6.51316	132.618	64.7986	527.31	1098.14	448.044	16.7683	27.7392	476.076	293.421	51.5327	16.5355	2580.55	56.7643	308.965	189.423	893.186	49.5004	953.081	191.208	45.2654	226.033	15.8649
p__Candidatus_Eisenbacteria	s__Candidatus_Eisenbacteria_bacterium	3974.24	1411.1	2622.46	2652.89	4581.09	1476.69	12347.4	1075.91	973.321	3698.32	368.237	2762.98	3656.46	2250.38	378.839	4087.31	2979.02	1327.79	1973.06	2388.34	1233	1567.86	3354.09	1423.71	2303.16	966.434	1623.17	10854.9	2290.54	1710.59	1104.92	3088.56	3434.69	2077.74	1022.02	859.082	1833.22
p__Candidatus_Rokubacteria	s__Candidatus_Rokubacteria_bacterium	36489	5625.11	5984.46	23941.3	31353.8	4160.66	27507.1	2984.36	3947.73	43727.9	888.898	32869	26803.8	29739.8	743.984	3600.04	18837.5	15222.4	23136.8	31964.7	3158.48	9659.28	27837.3	24219.1	7773.79	2668.17	18641.9	40606.1	21554.3	33168.4	5216.1	3954.42	20511.9	21498.3	2857.33	3306.77	3361.59
p__Candidatus_Tectomicrobia	s__Candidatus_Entotheonella_factor	3718.73	1499.99	5053.39	3771.77	5400.27	457.297	1940.71	429.31	1565.13	4424.52	91.1343	5263.04	3814.78	3050.59	81.6686	801.845	2582.12	1944.96	2005.74	2879.47	286.781	4292.61	3320.87	666.425	1175.87	314.234	2268.7	5022.88	2460.73	2737.65	531.459	927.412	3333.53	3324.28	1044.71	1092.61	2355.38
p__Candidatus_Tectomicrobia	s__Candidatus_Entotheonella_gemina	2879.27	1163.82	3842.07	3022.65	4260.49	349.136	1538.43	315.512	1123.33	3440.53	73.8894	4197.11	3019.72	2345.73	64.5347	578.491	2075.33	1537.76	1572.9	2223.8	215.655	3349.28	2610.39	510.191	947.902	259.728	1742.47	4203.23	2145.46	2158.68	425.369	652.797	2670.24	2680.25	796.509	882.887	1612.14
p__Candidatus_Tectomicrobia	s__Candidatus_Entotheonella_palauensis	7083.07	3260.88	10504.5	7495.51	10285.5	1029.02	3733.59	940.258	3105.23	8595.82	215.147	10485.8	7311.47	5914.84	180.92	1546.33	5274.19	3714.22	3614.44	5448.56	613.892	8858.28	6500.12	1270.97	2531.13	645.072	4417.09	10377.8	4815.87	5287.58	1186.25	2013.52	6621.58	6825.26	2201.27	2308.62	4825.69
p__Candidatus_Tectomicrobia	s__Candidatus_Entotheonella_serta	3011.63	1383.77	4525.95	3150.66	4467.26	409.864	1515.11	425.514	1341.75	3490.08	94.8329	4349.32	3041.57	2440.99	80.5261	647.319	2162.33	1595.73	1530.12	2336.68	273.143	3665.6	2622.39	574.368	1047.3	328.712	1891.6	4219.4	2070.05	2193.59	471.492	790.077	2782.35	2850.75	935.72	1057.16	2143.4
p__Chloroflexi	s__Chloroflexi_bacterium_CSP1-4	2528.17	905.884	1056.88	2927.34	3992.26	186.502	3497.07	398.205	508.861	2241.53	1257.58	1815.13	1938.65	5229.1	955.433	959.461	2264.98	3220.83	3046.99	1924.88	111.082	3253.1	3112.13	3716.1	2333.35	129.101	1923	3313.4	2193.92	1828.28	1827	1016.03	2705.96	2830.19	236.297	1699.14	453.912
p__Chloroflexi	s__Chloroflexi_bacterium_GWC2_73_18	1195.54	407.808	416.042	1430.07	1957.74	144.183	1526.59	260.064	281.847	1147.68	421.995	953.952	960.568	3305.74	293.432	532.985	1229.91	1985.63	1766.76	1077.34	126.092	1353.2	1494.51	2390.77	1135.37	122.218	1175.81	1263.62	1055.93	1030.99	1085.91	561.807	1142.8	1462.96	172.736	821.838	257.617
p__Chloroflexi	s__Chloroflexi_bacterium_RBG_16_69_14	3904.96	235.3	409.069	2318.16	3674.71	116.337	7110.69	228.279	180.602	2034.87	209.383	1498.18	1425.47	3672.66	136.55	337.359	1640.71	5205.47	7923.81	2663.52	68.1901	1704.1	2644.07	9402.12	822.681	98.434	1330.97	3315.41	2233.08	2345.47	732.418	409.141	1159.6	2818.24	73.439	422.048	167.345
p__Chloroflexi	s__Chloroflexi_bacterium_RBG_16_70_13	1312.29	198.738	266.934	1316.71	1803.75	90.2753	3522.87	165.073	142.401	1104.75	197.37	774.498	710.183	2473.85	135.342	220.483	1057.02	1884.33	2580.84	1178.75	47.3343	972.556	1355.34	3104.45	632.939	62.0254	713.097	1026.68	918.443	1203.65	647.18	389.938	731.608	1592.53	92.4442	341.052	155.905
p__Chloroflexi	s__Chloroflexi_bacterium_RBG_16_72_14	2448.8	382.449	548.705	2420.1	3329	141.719	5938.97	246.021	256.478	1740.47	404.067	1343.62	1253.74	3120.81	322.768	591.202	2139.69	3020.6	4039.93	3629.35	89.6672	1430.47	2164.01	4719.22	1162.98	90.9406	1298.59	2613.89	2836.1	1857.17	1134.32	556.802	1311.38	2659.46	153.997	712.488	282.077
p__Chloroflexi	s__Kallotenue_sp._CFH_73958	737.303	413.52	567.856	657.39	2174.84	464.618	694.369	377.372	530.176	1247.61	260.71	776.401	789.244	872.041	234.959	570.005	665.965	1488.95	1216.26	1343.01	621.669	610.349	684.896	1939.65	759.794	659.336	751.366	624.429	720.039	615.131	986.244	468.783	753.634	890.197	614.946	1667.29	567.185
p__Chloroflexi	s__Kouleothrix_aurantiaca	379.974	131.54	293.378	348.355	883.167	93.6058	579.311	91.8628	272.319	631.381	157.616	311.892	341.061	272.344	175.527	233.995	243.086	292.862	907.757	588.339	149.757	297.423	330.307	977.162	349.834	224.562	291.09	263.328	333.13	218.946	181.751	267.956	355.094	333.032	215.519	170.59	333.455
p__Chloroflexi	s__Nitrolancea_hollandica	355.887	120.499	181.577	262.597	764.987	95.8563	505.291	161.925	152.187	680.415	59.1406	431.081	382.843	283.017	80.4448	158.102	289.173	424.726	913.696	577.168	244.401	237.46	312.235	2026.62	217.244	176.189	553.565	544.629	458.011	329.507	306.251	149.249	474.474	386.936	346.641	243.096	184.266
p__Chloroflexi	s__Sphaerobacter_thermophilus	722.968	309.203	489.217	538.823	1232.95	249.459	851.307	278.624	392.875	691.468	120.774	643.993	717.955	527.315	117.695	389.403	627.759	785.89	891.033	990.283	687.933	410.216	540.645	937.505	422.377	405.841	709.462	1161.3	828.992	547.914	647.04	336.477	747.649	774.026	939.202	515.657	495.693
p__Chloroflexi	s__Thermomicrobiales_bacterium	3685.65	197.858	304.92	1910.32	3552.23	111.938	5757.85	195.982	126.006	2081.06	194.503	1458.66	1500.25	2733.37	170.351	324.63	1512.79	4624.84	6499.82	2870.34	67.0856	1358.12	2253.42	7689.35	698.925	72.9776	1579.45	3951.99	2714.28	1988.68	708.84	360.042	1525.73	2227.78	129.478	448.85	148.063
p__Cyanobacteria	s__Cyanobacteria_bacterium_13_1_40CM_2_61_4	946.124	247.717	600.113	909.637	1456.36	162.297	544.46	133.432	281.77	1328.86	49.9048	1013.22	980.123	833.529	41.723	234.057	459.982	654.595	964.331	984.515	133.198	809.914	809.532	780.455	371.494	95.7692	586.979	982.037	664.319	759.445	179.165	206.524	731.041	623.648	182.029	208.72	235.502
p__Cyanobacteria	s__cyanobacterium_TDX16	526.548	822.011	341.342	668.149	838.208	282.439	1153.94	160.494	162.102	531.451	233.582	445.861	624.474	913.27	108.947	513.392	527.363	579.543	678.046	1013.12	219.627	628.529	638.514	710.006	366.392	128.379	660.188	669.532	692.771	1939.77	771.53	371.66	548.253	610.011	474.308	601.618	312.487
p__Nitrospirae	s__Nitrospira_japonica	2434.05	24.0985	32.913	213.821	1196.39	25.8887	971.064	44.628	45.3485	2297.26	15.7914	490.555	921.069	415.734	11.2357	31.3004	351.6	216.863	2811.06	1266.11	36.5456	42.8754	689.879	2243.47	84.3144	40.0998	536.108	1160.24	1606.77	620.784	24.9121	40.1401	1008.89	374.849	26.4867	22.2924	46.1851
p__Nitrospirae	s__Nitrospira_moscoviensis	1620.96	110.392	132.043	294.829	862.6	89.5999	693.651	82.6033	126.768	1662.47	16.3691	446.465	761.689	402.008	10.7724	130.473	324.121	396.731	1901.65	927.269	106.835	119.692	565.619	1586.44	185.132	118.825	440.046	905.746	1197.91	496.686	73.8569	86.5329	796.591	361.099	108.739	84.0198	112.113
p__Nitrospirae	s__Nitrospira_sp.	3891.64	598.296	785.313	1065.12	2392	420.707	2113.07	415.971	640.802	3917.82	149.448	1551.7	2171.99	1882.16	155.922	770.558	966.598	1683.33	4864.59	2266.94	442.606	674.044	1757.91	4752.88	806.603	511.751	1455.48	2369	2823.84	1425.62	383.407	508.637	2260.68	1223.38	347.252	379.088	805.181
p__Nitrospirae	s__Nitrospira_sp._KM1	1914.81	34.1676	47.6821	192.498	952.07	45.1065	791.839	30.6884	43.4741	1798.42	10.2743	410.219	767.557	319.69	19.3703	48.1309	285.797	166.349	2355.63	1082.39	24.0374	57.6836	544.414	1773.22	79.6946	40.4452	447.728	982.337	1228.2	500.994	31.0769	37.7104	804.606	324.45	17.3966	23.5801	44.5264
p__Planctomycetes	s__Gemmataceae_bacterium	2343.45	556.95	1458.78	1844.11	8324.78	506.027	1763.21	496.504	1136.15	6444.66	186.049	1688.25	1824.05	1407.66	155.481	1420.31	1082.73	1844.8	2130.36	8949.35	1079.85	1014	1437.86	1755.75	804.952	422.743	1278.89	5556.62	2621.95	3022.81	638.276	614.473	1438.7	1106.44	649.269	989.231	765.061
p__Planctomycetes	s__Planctomycetes_bacterium_ETA_A8	927.493	110.063	386.432	570.726	2995.28	115.588	1123.74	120.003	190.821	1460.24	45.9403	726.796	776.781	309.78	39.4338	270.277	487.991	555.696	703.189	2146.3	268.892	174.013	448.377	439.318	226.916	77.7388	490.018	5558.07	4159.97	798.648	217.483	242.055	406.469	404.967	166.081	367.288	135.466
p__Planctomycetes	s__Planctomycetes_bacterium_I41	389.096	177.676	287.583	294.079	760.856	129.778	234.417	191.431	153.494	414.139	34.2836	582.873	490.735	200.821	29.6784	225.749	381.253	581.663	441.081	448.453	265.539	220.241	329.325	267.139	277.689	120.553	481.099	1156.5	721.995	317.635	138.888	186.378	577.515	347.878	169.773	166.102	144.364
p__Proteobacteria	s__Alphaproteobacteria_bacterium_13_2_20CM_2_64_7	1208.01	189.278	306.099	251.198	382.683	142.106	1718.92	92.1802	147.417	815.997	26.4586	297.345	349.563	288.793	28.249	147.025	317.714	470.432	1080.6	913.899	84.4125	329.258	421.086	951.402	260.91	55.1877	248.149	962.075	1484.38	425.675	162.943	197.696	340.624	233.08	101.763	147.782	152.486
p__Proteobacteria	s__Alphaproteobacteria_bacterium_RBG_16_64_48	2016.28	276.25	534.5	1320.79	237.92	423.402	1353.68	139.532	242.84	1372.18	135.129	910.794	1330.58	1678.74	115.511	169.58	1112.42	1590.25	2399.16	273.457	128.698	385.542	1454.16	3647.65	473.128	161.004	1048.17	1792.21	1501.98	743.929	273.882	268.898	1526.7	548.221	95.9825	289.798	189.784
p__Proteobacteria	s__Arboricoccus_pini	946.692	400.344	741.465	925.367	1148.03	586.376	435.311	170.166	579.594	1175.65	19.6391	1458.5	1201.72	1050.12	22.4682	326.892	865.782	706.586	593.697	715.247	164.57	1402.88	782.139	206.667	510.245	121.382	1004	807.14	703.455	636.944	632.516	219.248	1024.59	920.654	227.26	146.666	209.34
p__Proteobacteria	s__Azospirillum_brasilense	1230	936.75	1021.92	956.838	1313.93	786.613	551.074	486.748	726.3	1473.37	175.452	1341.2	1262.27	979.12	219.392	672.46	959.863	781.992	1086.08	1097.49	513.074	1338.67	928.542	621.235	843.569	330.246	1022.56	757.449	766.16	770.935	774.054	788.66	1114.06	943.175	457.211	827.332	579.896
p__Proteobacteria	s__Bauldia_sp.	1587.13	794.261	4141.86	1249.43	447.989	410.837	1370.17	407.822	619.823	1448.06	163.4	983.778	1320.18	2650.15	218.461	784.857	1461.39	926.839	957.585	733.705	170.51	2348.2	2175.38	932.845	1692.57	101.714	919.673	864.634	760.079	1077.48	818.803	1100.19	1726.76	1793.99	561.432	809.19	1560.07
p__Proteobacteria	s__Betaproteobacteria_bacterium	26489.7	5717.86	6206.07	20392.1	23427	3797.45	26752.1	3295.69	3092.54	27141.9	1350.37	17471.2	20131.6	19274.2	1394.89	13902.5	17516.9	35914.8	27429.6	36830.6	2510.85	11499.1	20503.8	34141.5	19259.7	1528.07	13250	29151.9	35850.1	22713	11145.2	9784.79	17699.2	26426.3	2461.32	9997.33	3229.37
p__Proteobacteria	s__Betaproteobacteria_bacterium_RBG_16_66_20	898.485	188.406	170.842	591.639	369.406	79.4298	610.801	75.3981	66.6552	889.225	15.8466	371.315	647.598	685.99	7.57708	508.386	996.179	884.254	547.046	1094.71	31.6651	492.505	672.713	706.494	1156.58	20.8956	378.773	1133.57	703	897.39	550.181	468.011	581.774	762.409	56.4721	397.009	68.8672
p__Proteobacteria	s__Betaproteobacteria_bacterium_RIFCSPHIGHO2_12_FULL_69_13	1207.3	300.91	286.725	846.831	952.135	117.763	868.456	106.579	88.199	1289.71	26.5885	705.313	907.079	940.415	35.3477	749.283	1353.05	1630.58	982.007	1830.44	69.9414	672.969	1020.21	1207.76	1554.83	73.1573	627.292	1385.49	1329.01	1469.31	689.327	591.528	835.02	1240.84	70.5198	487.791	72.8177
p__Proteobacteria	s__Betaproteobacteria_bacterium_RIFCSPLOWO2_02_64_14	1133.58	210.563	323.896	612.115	503.727	149.131	1023.42	128.028	106.289	3565.33	67.7991	639.954	749.104	1291.76	57.5265	840.544	495.945	812.812	978.381	1847.94	68.223	720.125	1386.24	1163.97	1095.44	45.8436	555.959	1341.99	858.468	848.684	495.188	482.648	861.782	783.242	82.3301	621.002	146.453
p__Proteobacteria	s__Betaproteobacteria_bacterium_RIFCSPLOWO2_02_FULL_67_26	1926.54	315.383	372.85	817.946	1349.82	186.319	744.508	129.843	120.681	2497.39	25.9424	826.305	869.255	2149.61	37.8142	1007.35	718.465	2230.17	1375.3	3673.5	91.2641	1240.84	1306.46	2351.86	1396.99	47.3805	884.272	2193.4	2283.12	1426.5	636.708	528.636	1275.07	947.673	59.8724	683.49	124.94
p__Proteobacteria	s__Betaproteobacteria_bacterium_RIFCSPLOWO2_12_FULL_62_13	644.758	342.279	454.062	703.43	633.1	263.37	712.721	165.915	160.063	1294.21	74.5515	871.599	750.346	1136.41	80.14	1608.15	750.083	904.721	533.824	1005.03	138.11	1105.4	1093.44	717.894	1922.67	103.972	548.174	1050.17	671.917	654.762	727.353	932.915	1082.07	1074.63	123.766	1337.94	219.275
p__Proteobacteria	s__Betaproteobacteria_bacterium_RIFCSPLOWO2_12_FULL_62_58	754.325	349.5	476.911	646.126	615.028	242.705	643.039	157.246	144.333	1455.45	48.3624	816.737	748.845	1315.69	45.6213	1650.85	717.12	878.824	533.983	1049.17	97.3576	1051.46	1209.31	792.911	1863.21	81.6323	603.01	1199.32	768.557	683.326	789.963	843.823	1059.07	960.064	98.6576	1260.1	191.316
p__Proteobacteria	s__Betaproteobacteria_bacterium_RIFCSPLOWO2_12_FULL_65_14	4787.71	504.429	381.493	2363.24	7290.35	272.061	4343.94	282.247	182.412	4299.93	76.4088	2316.47	3025.83	2139.44	43.3381	963.57	3437.39	9091.12	5271.29	7754.34	166.692	980.403	2405.06	6996.07	2082.28	140.497	2198.19	3775.72	6822.14	4710.83	1134.94	875.96	1723.66	4435.73	144.393	803.388	189.849
p__Proteobacteria	s__Betaproteobacteria_bacterium_RIFCSPLOWO2_12_FULL_68_19	3054.84	181.446	141.857	1666.04	4667.29	92.7794	4198.63	102.808	27.4219	2715.83	27.9659	1557.03	1756.15	1419.58	17.926	491.285	1508.32	5517.27	2603.32	3652.53	27.0567	506.169	1793.35	3699.96	946.982	27.4526	1187.57	2984.62	4188.15	3284.88	520.178	415.007	1055.05	2485.93	15.8789	318.394	49.1137
p__Proteobacteria	s__Betaproteobacteria_bacterium_RIFCSPLOWO2_12_FULL_68_20	646.054	170.972	174.332	501.27	474.646	68.5141	430.083	68.3573	61.7932	671.617	90.6089	362.549	536.575	549.519	76.7607	492.786	815.785	788.833	475.77	895.096	52.7498	375.07	566.194	635.087	869.629	29.3528	320.738	744.051	590.246	789.63	413.035	365.829	473.924	654.948	35.6621	320.701	52.9181
p__Proteobacteria	s__Betaproteobacteria_bacterium_SCGC_AG-212-J23	1096.72	68.9832	58.6682	427.568	1010.53	33.3206	715.205	37.7675	24.4212	951.3	11.9853	363.388	509.172	335.78	6.51389	191.416	440.514	1289.77	1835.01	2147.44	22.7575	172.483	427.043	2397.62	356.694	13.6809	361.485	839.977	2154.63	991.77	198.727	156.871	329.714	558.925	18.4855	132.975	28.0141
p__Proteobacteria	s__Betaproteobacteria_bacterium_SG8_39	830.151	339.539	352.353	850.612	432.762	168.792	528.056	127.376	141.711	988.651	88.1672	552.581	859.458	874.141	54.9797	991.24	1107.4	1060.36	462.633	1066.73	108.673	731.732	994.627	510.434	1675.08	52.7308	500.502	1008.26	620.404	1020.85	749.319	702.551	827.1	1003.96	84.9918	622.832	137.016
p__Proteobacteria	s__Betaproteobacteria_bacterium_SG8_41	1668.46	1378.15	1963.44	3659.81	450.87	359.794	578.893	185.563	352.802	6635.32	145.61	3790.91	3486.39	6223.09	99.6932	1181.61	2478.28	1017.2	433.798	1794.45	151.272	5990.56	5654.53	688.976	5559.93	81.9099	4897.87	9967.19	875.982	3722.13	2520.79	1047.48	7382.44	4279.03	110.321	914.622	330.297
p__Proteobacteria	s__Bradyrhizobiaceae_bacterium	1745.03	490.473	668.116	620.165	1501.19	413.53	1448.31	292.833	290.543	1387.47	116.89	756.893	847.144	720.62	97.1339	400.926	735.604	1584.6	2140.57	1988.11	230.21	673.37	850.548	1723.66	675.649	127.155	824.201	1123.83	1556.23	846.12	468.595	571.17	763.931	629.673	220.813	520.898	364.091
p__Proteobacteria	s__Bradyrhizobium_erythrophlei	939.723	345.868	423.966	470.744	462.37	237.96	944.652	195.442	244.515	658.127	117.038	515.561	663.152	568.371	114.934	263.562	362.798	405.781	1286.52	671.516	131.857	577.276	765.207	515.936	352.617	105.274	542.784	611.309	699.54	595.867	333.377	298.223	421.728	375.955	138.458	240.458	222.295
p__Proteobacteria	s__Burkholderiaceae_bacterium	598.402	199.596	192.047	415.594	386.7	193.76	653.037	178.324	139.175	403.47	102.157	303.984	482.812	398.428	91.0631	274.964	276.786	996.12	655.175	498.564	158.122	277.044	315.832	488.231	296.611	80.4461	400.317	745.042	724.39	301.306	245.949	248.252	268.925	258.27	166.959	237.795	127.769
p__Proteobacteria	s__Deltaproteobacteria_bacterium	44086.5	41490	39266.5	37123.5	36423.2	24593.4	52477.1	17690.5	27470.2	52647.8	28273.2	43222.2	43878.5	33376	13575	26322.8	38606.7	39161.7	42530	41413.3	28173.8	37046.3	43428.3	38382.5	47823.3	13063.6	27244.4	51493.9	41506.1	37540.2	19180.7	25825.7	35120.5	41508.1	26559.3	15207.2	48897.7
p__Proteobacteria	s__Enhydrobacter_sp._CC-CFT640	465.93	407.927	399.538	390.206	369.896	302.247	468.118	198.519	238.244	511.667	61.921	496.22	415.346	458.255	57.1286	247.361	382.888	303.581	350.131	393.746	182.423	571.255	392.425	245.076	389.883	143.135	398.287	440.255	373.707	479.463	376.505	314.001	448.849	384.349	161.521	318.948	205.74
p__Proteobacteria	s__Gammaproteobacteria_bacterium_SG8_30	1208.09	217.299	222.101	515.106	161.671	237.589	1853.22	182.199	166.445	934.959	407.411	446.105	737.733	576.776	326.77	212.936	785.493	247.893	485.737	411.458	127.891	300.18	665.42	231.403	273.624	65.9347	215.013	1407.21	616.962	356.652	172.395	208.374	279.131	230.889	186.315	147.66	308.638
p__Proteobacteria	s__Geminicoccaceae_bacterium	1154.91	526.798	1028.47	1096.52	1447.88	802.46	452.556	232.585	760.719	1475.95	46.5529	1826.15	1575.4	1167.29	44.3797	496.385	1062.16	911.151	652.116	821.794	252.335	1762.24	1003.71	238.006	684.483	169.344	1221.5	990.329	852.51	789.705	786.93	337.399	1288.94	1200.25	338.774	227.742	306.801
p__Proteobacteria	s__Geminicoccus_roseus	1454.56	608.882	1153.26	1349.97	1685.78	824.863	634.865	263.618	855.446	1635.79	56.1876	2167.62	1820.22	1491.87	70.274	505.833	1291.5	1074.52	921.219	1011.98	282.926	2121.18	1192.71	411.085	783.45	161.355	1560.06	1221.63	1024.67	959.165	988.571	376.318	1577.06	1313.59	376.647	286.636	309.831
p__Proteobacteria	s__Geminicoccus_sp._CPCC_101082	1433.58	603.756	1148.52	1302.91	1712.22	838.138	578.382	255.959	850.491	1727.36	60.285	2161.35	1751.61	1370.77	41.9505	460.821	1200.64	1018.77	907.339	1003.16	265.67	2142.69	1186.1	425.011	756.571	193.365	1440.09	1161.64	1026.98	962.056	964.169	364.727	1569.55	1338.59	333.046	265.495	347.192
p__Proteobacteria	s__Hypericibacter_adhaerens	706.637	945.918	793.89	765.911	486.274	518.165	684.731	383.571	429.311	1002.9	77.1753	779.287	751.47	853.456	144.469	696.55	712.949	429.819	584.914	630.102	359.094	1133.15	894.438	450.496	756.929	211.57	974.61	417.588	443.664	925.993	766.21	630.762	892.584	573.944	239.083	611.119	412.256
p__Proteobacteria	s__Hypericibacter_terrae	691.139	793.412	716.758	665.191	477.04	468.27	646.395	369.397	407.275	925.811	106.987	721.197	685.612	915.886	159.85	633.777	614.866	504.098	595.388	605.016	337.07	955.25	749.442	482.905	670.847	198.134	892.214	445.211	436.641	883.786	657.427	588.253	829.349	532.225	208.492	519.757	390.03
p__Proteobacteria	s__Hyphomicrobiaceae_bacterium	2005.91	1363.56	835.662	937.102	639.03	548.999	1080.28	381.304	463.278	1941.01	754.848	904.141	1386.92	1038.9	720.636	570.562	1000.33	743.323	3043.35	1653.27	457.339	972.544	1140.63	3047.75	706.447	270.156	928.324	1393.7	1358.24	3556.2	581.86	643.049	1057.62	715.76	343.016	699.064	396.577
p__Proteobacteria	s__Hyphomicrobium_sp._CS1BSMeth3	694.996	173.477	148.447	515.632	394.509	180.06	761.119	101.755	89.4325	685.735	289.105	276.855	466.862	296.311	277.27	139.454	275.454	379.627	1903.53	1768.41	98.5213	701.506	405.093	1130.48	155.152	61.7944	212.945	486.285	1706.3	467.568	123.159	162.624	280.427	152.863	76.2934	164.962	115.152
p__Proteobacteria	s__Hyphomicrobium_sp._xq	765.993	185.271	234.512	378.574	335.997	95.6261	921.369	91.2072	84.5593	492.537	102.328	253.183	301.308	443.161	85.2506	198.545	322.459	938.812	1729.68	599.474	55.6174	280.713	453.579	2134.45	185.382	63.8554	403.905	304.712	605.825	433.604	172.687	236.385	339.255	158.361	34.9155	131.834	70.8469
p__Proteobacteria	s__Inquilinus_limosus	1154.98	1056.08	1160.21	1062.64	1068.98	862.864	537.662	504.84	730.168	1411.17	150.646	1673.07	1279.05	1207.91	174.63	696.987	1137.11	874.965	772.774	902.989	430.398	1706.01	1385.56	480.654	948.2	303.472	1351.31	917.372	778.631	1127.63	1025.74	785.739	1320.13	1034.06	421.162	933.092	618.298
p__Proteobacteria	s__Kofleriaceae_bacterium	388.73	138.027	245.475	532.58	581.186	103.921	1186.7	239.214	96.9124	344.23	53.2196	340.746	388.093	354.769	20.2885	571.074	312.167	331.892	684.976	939.628	129.636	264.225	424.787	649.024	286.995	113.612	375.187	682.006	583.627	229.339	360.12	350.298	350.122	555.822	685.659	403.637	128.082
p__Proteobacteria	s__Mesorhizobium_alhagi	8475.17	185.512	254.783	421.083	2502.93	179.219	1018.09	228.951	93.05	1781.9	98.4637	5624.03	3046.04	788.795	62.3382	251.273	448.419	4729.74	5953.48	3153.02	86.3462	451.709	1193.64	736.515	228.334	73.8745	5407.21	2137.09	2351.81	2510.67	359.616	318.098	1214.74	330.468	107.834	225.403	132.413
p__Proteobacteria	s__Mesorhizobium_camelthorni	1551.55	215.453	209.173	287.228	423.496	172.6	407.208	146.44	105.749	430.323	61.1031	677.481	542.296	391.94	49.84	231.331	209.249	813.011	1163.05	769.703	116.207	339.871	375.905	363.057	208.64	72.5293	1148.46	729.723	714.429	788.381	306.202	308.927	443.693	248.511	103.889	296.468	94.7519
p__Proteobacteria	s__Mesorhizobium_sp.	2749.54	1233.23	1475.01	1517.59	1468.01	993.139	1447.37	672.39	808.513	1938.71	373.389	2027.89	2872.5	1663.66	532.097	1191.96	1273.21	2248.95	2279.64	1832.69	686.197	2265.88	1740.28	1251.75	1155.04	415.492	2637.83	2087.69	1918.71	1902.51	1410.93	1308.15	1907.6	1483.14	602.161	1289.3	791.893
p__Proteobacteria	s__Mesorhizobium_sp._YM1C-6-2	2608.11	108.765	128.518	1095.06	708.885	99.8315	2105.67	105.196	56.4792	869.806	81.1477	734.144	3380.56	1120.59	62.0871	353.55	225.166	2946.14	3422.95	2353.65	42.3968	1018.25	1021.26	889.3	142.109	35.1481	1475.07	3476.47	4085.98	907.996	300.744	327.308	1409.95	720.375	71.3453	200.477	89.5588
p__Proteobacteria	s__Methyloceanibacter_marginalis	2819.43	2527.58	6265.25	3167.26	1234.53	2171.47	2580.17	1047.83	2858.66	1891.84	2362.66	5212.41	5813.72	2699.08	2078.85	2991.02	5849.84	6522.77	1223.29	613.516	365.561	4255.8	3652.08	1579.52	2527.06	644.275	2529.17	5793.87	5322.18	2277.98	4230.52	2695.4	4368.53	5379.45	1185.02	6614.18	2469.88
p__Proteobacteria	s__Microvirga_massiliensis	690.392	324.113	428.059	428.55	570.84	274.613	337.51	162.013	261.217	732.566	82.2934	671.953	662.741	495.667	62.3178	351.588	431.71	556.648	634.571	557.133	183.213	620.059	491.024	719.861	466.591	114.453	703.906	462.806	467.657	369.438	473.568	396.465	575.749	512.679	157.657	369.191	179.929
p__Proteobacteria	s__Nannocystis_exedens	251.527	315.899	589.16	793.57	286.433	262.375	447.691	235.221	177.908	342.545	79.1435	569.075	823.597	228.1	38.5248	419.278	420.697	294.467	254.3	569.042	225.162	277.564	656.662	305.879	285.205	129.996	266.299	479.658	324.304	243.886	369.83	604.562	502.249	585.114	514.888	473.831	322.286
p__Proteobacteria	s__Nordella_sp._HKS_07	605.962	371.064	340.83	440.227	331.131	285.067	637.409	192.764	152.071	482.89	78.096	494.785	521.907	615.76	63.6729	272.605	445.625	724.19	752.69	288.915	162.977	511.989	658.878	949.306	538.662	67.1315	703.225	221.797	377.218	372.734	323.922	384.043	729.341	479.525	131.457	474.78	279.868
p__Proteobacteria	s__Phyllobacteriaceae_bacterium_SYSU_D60010	789.402	545.075	513.68	558.603	461.666	409.261	883.734	281.977	221.5	648.03	118.18	646.45	724.167	721.583	94.7832	379.868	593.235	871.026	1164.49	495.924	197.31	715.543	814.766	1201.85	698.598	78.5768	797.454	331.201	466.467	503.2	445.715	556.521	906.56	559.509	190.829	646.843	383.714
p__Proteobacteria	s__Phyllobacteriaceae_bacterium_SYSU_D60012	578.982	366.468	299.653	352.765	273.664	308.665	801.946	205.909	134.255	428.345	90.0364	389.915	430.84	573.622	46.1138	240.852	398.557	644.884	797.234	287.819	166.587	434.322	649.263	1055.33	504.475	78.2741	623.816	145.493	313.799	394.838	289.959	389.954	647.452	379.987	162.612	512.327	264.13
p__Proteobacteria	s__Pseudorhodoplanes_sinuspersici	2905.83	270.207	340.355	1920.35	1164.98	354.857	5592.87	168.049	129.463	1548.04	67.2966	1503.33	1605.41	1270.94	48.1198	994.714	1173.73	1834.06	1480.87	1153.63	97.4049	1004.49	2237.26	1248.65	396.713	71.3792	1007.14	3406.23	3425.15	1102.14	341.563	488.748	1068.22	886.27	103.653	329.546	189.3
p__Proteobacteria	s__Reyranella_soli	1059.51	183.03	177.166	196.268	763.911	115.528	1396.91	88.1211	78.0674	730.208	36.9066	375.372	254.17	342.365	31.1051	105.731	210.232	996.786	2732.17	1515.55	65.0327	766.216	353.128	1715.61	162.465	49.9229	373.917	1207	975.187	1185.09	182.31	124.603	290.844	187.239	52.4583	117.643	91.3806
p__Proteobacteria	s__Rhizobiales_bacterium	25031.6	13552.1	19339.6	17665.5	13869.5	14167.7	19070.2	7200.97	10401	24707.9	4775.73	23048.8	24317	20132.5	4355.45	12905	18429.1	18791.3	22301.3	13960.6	7108.59	22798.2	20680.2	21190.6	14059.5	4081.98	19800.2	20557.6	17934.3	16085.5	13094.4	12158.5	22965.3	17094.2	6562.89	13899.4	8110.15
p__Proteobacteria	s__Rhizobiales_bacterium_L72	725.233	851.816	1488.32	592.381	479.831	558.454	430.559	434.756	393.247	880.588	112.348	939.022	994.584	736.21	110.192	738.78	646.614	1113.83	782.483	444.489	374.571	946.465	757.468	896.72	1042.24	207.966	716.252	416.963	485.662	461.471	856.034	711.787	869.218	845.987	371.051	762.799	530.138
p__Proteobacteria	s__Rhodoplanes_sp._Z2-YC6860	4074.66	231.26	417.368	588.28	564.827	188.694	4512.47	156.56	129.524	3235.82	61.9495	600.948	985.78	793.295	56.1913	312.539	596.851	825.039	2600.76	2077.51	104.681	790.65	1190.61	2749.35	437.097	69.62	494.252	4765.96	4495.56	1001.63	266.127	388.206	691.375	486.959	102.44	243.474	229.66
p__Proteobacteria	s__Rhodospirillaceae_bacterium_SYSU_D60006	1675.36	371.214	401.679	1392.72	1803.6	250.006	1821.62	198.911	229.456	2685.63	80.9556	1438.52	930.773	1515.25	81.1005	374.642	438.541	888.595	3905.67	6945.25	143.204	586.336	824.542	2135.71	354.631	103.259	1049.43	1144.22	2126.19	4939.16	571.626	335.272	761.587	406.291	129.73	344.853	206.769
p__Proteobacteria	s__Rhodospirillaceae_bacterium_SYSU_D60009	3748	736.279	701.702	3220	4182.89	523.271	3551.61	360.486	439.311	6132.37	140.204	3059.26	1813.2	3247.46	117.068	628.551	835.054	1794.97	8507.99	16948.8	306.642	1253.21	1616.06	4383.61	706.51	197.7	2277.48	2201.52	4661.92	12088.8	1254.31	613.231	1570.61	935.231	254.899	581.448	356.206
p__Proteobacteria	s__Rhodospirillaceae_bacterium_SYSU_D60015	2400.03	917.483	838.272	2909.19	1725.97	619.204	6374.26	401.823	534.598	5220.89	141.925	1740.26	4098.57	2628.71	133.607	703.72	968.361	1783.2	1143.27	3953.75	368.74	1539.3	2891.6	598.728	887.625	199.221	1291.93	2410.41	2570.47	7727.71	861.246	690.698	1851.7	1797.08	361.473	621.936	469.435
p__Proteobacteria	s__Rhodospirillales_bacterium	9071.85	10602.8	11283.7	8458.16	9224.44	7263.68	5595.99	4965.58	8262.16	11114.4	1384.7	12479.3	10009.6	8883.99	2142.43	5462.71	9526.56	7690.5	8469.67	7770.98	4557.18	15413	8081.48	4718.57	8602.41	2552.85	8743.63	7898.92	6759.73	9939.95	7937.63	6948.04	9735.22	8558.24	4133.82	8077.01	5956.53
p__Proteobacteria	s__Rhodospirillales_bacterium_URHD0017	1182.06	120.53	104.115	138.764	897.57	96.2078	1521.66	56.2964	77.9433	713.29	25.3828	293.97	213.528	314.753	17.64	126.613	203.652	1156.67	3072.64	1731.96	34.5226	749.32	312.276	1899.81	131.043	28.6463	288.959	1077.02	1177.62	1104.1	136.402	102.575	222.528	129.909	57.0813	86.8618	93.4351
p__Proteobacteria	s__Skermanella_aerolata	2022.1	798.734	976.429	1031.2	3660.99	665.171	1027.98	428.735	654.903	1836.66	98.7214	1489.86	1646.33	1000.48	144.13	544.915	1082.7	1204.75	2671.73	7249.13	398.085	1328.46	1164.15	1836.78	783.637	219.593	1738.08	980.767	1525.9	1040.08	811.655	831.76	1370.86	1182.38	317.521	678.174	474.478
p__Proteobacteria	s__Skermanella_pratensis	970.884	813.577	817.481	722.341	1453.75	596.269	518.595	390.936	570.771	1113.29	97.827	1113.32	1012	739.157	114.165	462.57	814.129	638.203	849.897	1528.01	390.297	1105.57	760.217	584.767	726.526	199.549	990.345	616.057	682.849	741.079	628.219	894.12	901.87	807.514	323.376	635.664	417.973
p__Proteobacteria	s__Skermanella_stibiiresistens	818.402	599.202	682.242	636.802	1138.33	479.133	393.999	331.965	463.194	878.295	64.7622	967.933	832.517	648.249	115.099	468.441	634.57	556.389	622.008	1145.48	318.267	955.034	632.901	352.585	549.288	164.85	801.909	510.585	576.046	557.197	538.019	579.3	755.813	662.535	242.57	450.525	369.724
p__Proteobacteria	s__Sorangium_cellulosum	1767.24	1168.63	1511.19	1864.06	1912.57	761.342	2561.96	685.362	731.729	1227.16	330.718	1431.34	2028.26	1030.72	197.695	1889.58	1082.18	1334.95	1569.17	2731.06	804.556	1206.26	1508.11	1450.63	1227.05	403.549	1112.18	2357.27	2886.89	1033.22	1809.1	1841.48	1693.09	1551.02	1811.17	1779.46	1011.85
p__Proteobacteria	s__Sphingomonadales_bacterium	1208.7	437.207	703.299	519.26	377.87	315.781	497.425	382.834	233.395	1560.87	306.816	628.662	1203.76	1360.76	227.324	378.73	557.78	541.725	2304.47	839.365	174.326	711.697	1060.37	1888.64	389.532	108.985	852.714	698.021	748.633	1204.78	1422.15	842.89	797.881	683.052	190.77	505.522	375.642
p__Proteobacteria	s__Sphingomonas_edaphi	462.149	18.1155	11.9539	247.327	312.431	34.083	2501.29	27.9964	8.85847	337.573	19.9303	290.905	263.997	279.924	5.56215	211.793	75.1486	954.68	1140.54	793.208	9.94233	147.348	268.492	731.323	178.541	8.90492	574.019	668.666	604.912	1800.93	199.891	49.1577	268.921	185.238	8.38819	56.8026	6.89323
p__Proteobacteria	s__Sphingomonas_sp.	374.214	92.6568	68.6354	386.706	332.979	107.865	1131.5	63.4421	53.0848	364.377	73.7449	360.979	415.703	418.476	30.0594	360.47	109.978	844.979	722.682	502.967	38.6607	168.765	325.925	756.859	602.312	31.3335	877.931	770.077	558.878	1564.92	450.715	156.47	353.821	243.612	58.2873	162.517	53.526
p__Proteobacteria	s__Sphingomonas_sp._HDW15C	275.677	80.4382	19.1684	529.33	338.919	91.3783	627.799	56.0131	14.5869	323.87	20.5051	464.737	436.9	545.73	7.49711	491.166	79.2861	1133.88	545.512	419.231	14.1239	68.3319	377.026	773.204	802.723	11.6993	1416.2	153.654	412.555	318.799	1365.17	145.56	547.85	320.277	31.2836	278.409	17.9431
p__Proteobacteria	s__Sphingomonas_sp._URHD0007	313.341	45.034	27.595	415.669	409.668	66.8804	893.385	57.8771	9.43251	350.869	16.604	496.595	520.869	427.06	8.71829	570.403	95.5694	1093.35	593.82	525.855	10.4726	88.6945	391.026	924.898	453.821	7.48458	1196.89	232.738	447.625	457.962	792.901	105.918	530.478	276.267	16.6217	141.719	15.5848
p__Proteobacteria	s__Sphingosinicella_sp._CPCC_101087	420.02	99.7486	89.158	379.886	434.127	87.0412	320.531	74.1064	41.1221	592.557	46.7762	442.609	454.356	375.646	9.53504	226.424	101.832	2249.06	1216.17	377.01	45.6041	207.558	249.718	825.599	265.436	40.3753	841.048	302.586	372.043	699.109	877.223	156.621	289.861	157.46	58.3342	333.301	47.175
p__Proteobacteria	s__Stella_sp._ATCC_35155	521.925	513.173	554.682	487.491	418.007	373.822	266.844	258.686	355.598	682.322	66.8632	671.223	526.831	608.284	92.3771	348.013	506.213	365.536	305.992	322.121	256.012	736.977	500.529	186.334	460.042	135.761	495.963	330.237	309.967	405.084	404.966	374.354	565.916	440.058	188.481	427.273	288.894
p__Proteobacteria	s__Steroidobacter_agariperforans	614.963	180.139	185.512	968.297	1065.3	127.033	616.685	138.739	77.9064	603.81	75.1945	625.042	509.786	294.367	51.4594	305.759	330.174	2337.31	1126.99	1627.13	88.2398	306.686	390.169	1062.29	172.098	35.0133	460.476	886.83	1544.24	772.235	1615.17	426.04	368.229	321.455	92.0639	374.084	171.627
p__Proteobacteria	s__Steroidobacter_cummioxidans	612.978	166.565	172.494	1106.37	1009.55	138.335	651.944	120.204	101.637	573.703	55.103	662.694	519.323	327.98	29.113	350.73	362.709	2327.27	1135.62	1586.17	101.698	381.427	454.595	1032.72	205.584	24.0015	504.986	825.551	1425.52	751.764	1812.66	456.624	371.401	384.273	104.665	408.038	198.779
p__Proteobacteria	s__Steroidobacter_soli	652.213	172.12	191.457	1041.63	1038.97	121.938	724.985	141.354	85.793	536.023	67.2859	629.087	520.572	340.689	44.7567	326.094	371.201	2278.19	1153.88	1545.37	80.6438	340.835	467.697	1016.73	198.957	33.5943	475.786	855.615	1446.58	768.743	1592.14	468.441	368.212	387.737	129.94	356.767	188.856
p__Proteobacteria	s__unclassified_g__Mesorhizobium	950.886	372.599	413.937	495.251	331.596	260.823	456.063	181.695	201.74	514.031	127.057	497.53	756.792	573.811	149.513	372.907	340.599	658.996	697.881	591.835	181.307	644.293	579.952	427.948	358.73	135.246	703.231	693.978	719.828	545.646	469.297	481.605	640.512	396.545	196.415	354.949	193.241
p__Proteobacteria	s__unclassified_o__Rhizobiales	666.417	413.159	416.01	403.099	339.932	351.317	721.373	246.182	155.525	522.973	138.211	490.209	538.166	636.152	131.331	308.598	460.197	717.787	742.815	338.65	182.883	527.322	692.885	896.19	561.066	104.499	706.961	270.718	363.261	412.298	367.376	418.427	739.689	477.886	173.014	492.309	307.626
p__Proteobacteria	s__uncultured_Defluviicoccus_sp.	437.53	330.348	475.426	431.225	542.111	312.444	176.951	148.546	376.261	537.882	40.91	668.986	527.881	438.548	62.8861	263.157	380.178	331.798	233.036	312.656	134.562	767.149	403.609	110.199	349.856	93.418	417.738	366.712	285.038	342.967	341.117	237.417	483.595	424.248	142.982	192.051	277.939
p__Proteobacteria	s__Xanthobacteraceae_bacterium	3689.77	187.385	316.095	517.558	379.396	168.023	3880.1	148.795	115.143	3168.16	68.5465	441.443	887.914	750.414	42.2791	195.462	468.885	679.222	2023.46	1343.71	68.9398	690.909	1154.19	1962.73	360.62	45.0321	503.182	4292.52	3868.52	807.074	214.038	359.394	607.28	397.003	73.066	202.203	221.008
p__unclassified_d__Bacteria	s__bacterium_HR12	820.235	201.261	140.246	656.502	1903.97	92.5612	704.012	137.891	85.8778	881.682	67.4511	510.81	643.318	3066.12	53.0596	126.402	1466.96	1614	1500.88	1634.23	95.305	571.879	794.76	2315.18	496.655	130.443	640.433	601.255	563.576	1282.54	584.495	250.384	874.881	2561.69	73.9576	236.499	55.1892
p__unclassified_d__Bacteria	s__bacterium_HR39	462.567	269.178	495.688	533.034	612.398	342.565	170.194	122.516	359.347	591.49	12.9635	783.69	686.384	518.464	15.8595	156.197	473.729	395.724	268.293	335.009	149.103	821.241	448.08	102.275	318.55	83.2839	491.196	414.016	393.107	350.278	363.711	151.647	602.785	511.674	147.288	115.794	146.327
p__unclassified_d__Bacteria	s__bacterium_HR40	2082.9	1036.11	1903.29	2029.75	2532.94	1370.65	862.522	441.512	1362.11	2578.65	68.6508	3372.89	2637.33	2150.6	81.4999	681.292	1943.67	1520.84	1169.12	1504.14	496.258	3488.61	1776.08	448.545	1211.46	295.606	2185.96	1754.02	1589.44	1531.17	1551.61	568.504	2376.96	2167.84	586.406	425.998	526.743
p__unclassified_d__Bacteria	s__Terrabacteria_group_bacterium_ANGP1	440.653	347.731	381.246	492.129	559.023	325.764	379.228	293.215	356.791	568.892	82.3814	541.591	487.069	751.356	106.376	285.636	407.74	531.002	592.34	501.786	407.947	566.044	417.283	640.441	445.48	368.734	402.151	492.742	443.674	423.534	373.305	264.553	481.165	481.43	276.469	281.843	282.542
p__unclassified_d__Bacteria	s__uncultured_bacterium	4901.91	1567.66	2065.74	3669.13	5204.78	1259.56	3697.11	1597.62	1451.04	7394.16	1162.07	3811.84	4632.64	2760.77	918.199	2046.6	2190.17	4893.56	6713.34	5501.41	1539.64	2202.89	2937.42	6137.51	2032.58	1174.13	2733.33	4909.14	6118.55	4301.64	1661.61	1963.92	3109.1	2438.73	1888.73	1495	2008.82
p__Verrucomicrobia	s__Opitutus_sp.	497.56	246.919	125.969	242.299	686.866	166.847	839.021	95.9346	94.2738	493.138	23.6389	278.171	529.187	298.822	22.9154	450.113	143.236	460.782	496.294	1146.64	73.9154	245.431	671.811	252.198	1520.37	43.8961	285.499	1068.4	1131.93	275.926	204.62	469.908	446.69	386.321	87.4781	454.764	66.8589
p__Verrucomicrobia	s__Pedosphaera_sp.	1188.81	419.46	436.666	665.548	894.873	288.007	1121.93	205.263	308.583	1677.61	56.2855	975.262	1456.49	623.159	43.3505	1003.09	391.659	589.59	580.931	1437.41	262.135	794.244	1299.23	317.667	649.307	152.076	1046.18	2016.79	1395	479.375	631.098	887.75	1376.48	902.978	335.151	1427.03	248.638
p__Verrucomicrobia	s__Verrucomicrobia_bacterium	6944.8	5513.49	3990.84	5446.55	5793.59	2724.14	7051.94	2277.75	3045.29	9365.58	1073.73	6432.58	6765.31	4481.13	896.39	9188.67	3556.12	4871.99	5094.34	7404.42	2620.88	5245.52	7907.25	4366.4	5512.69	1722.69	5648.01	10513.2	7300.36	3811.86	3966.59	6626.87	7795.46	6841.61	2728.69	8776.54	2586.86
p__Verrucomicrobia	s__Verrucomicrobia_subdivision_3_bacterium	1498.58	922.92	865.309	1338.39	1295.86	560.069	1949.92	454.032	476.201	2177.32	242.47	1515.81	1624.1	937.495	186.156	2173.48	812.25	906.825	689.243	1676.1	504.517	1219.92	1875.48	523.557	1253.2	270.094	1498.44	2491.19	1411.81	721.593	1097.41	1687.63	2305.97	1723.78	540.815	2641.61	657.953

## Sheet: posi_bact
phylum	speci	HK4	HK14	HK50	HK19	HK45	HK97	HK56	HK88	HK9	HK37	HK87	HK103	HK31	HK34	HK59	HK61	HK10	HK100	HK74	HK41	HK95	HK30	HK48	HK2	HK67	HK17	HK110	HK77	HK71	HK54	HK26	HK64	HK23	HK79	HK106	HK91	HK83
p__Actinobacteria	s__Actinobacteria_bacterium_QS_8_72_14	38.9592	224.926	82.8618	214.964	149.727	115.885	58.1255	658.635	56.7091	60.8753	28.1687	109.014	127.232	310.582	20.5948	358.276	151.323	238.302	82.6281	46.6953	1375.15	152.736	179.398	212.137	163.453	1901.74	182.524	44.2431	51.9453	70.3365	355.397	132.557	110.051	148.282	154.001	615.691	54.4494
p__Aquificae	s__Aquificales_bacterium	100.745	120.143	362.753	272.682	98.5218	122.283	143.014	96.0019	553.385	189.25	376.073	337.714	325.82	127.458	309.439	327.187	295.474	90.5395	55.383	51.0682	357.531	296.893	281.939	18.539	101.529	639.092	170.923	86.7042	87.0793	78.1358	91.6419	254.976	326.753	410.721	489.522	79.2165	660.14
p__Bacteroidetes	s__Bacteroidetes_bacterium_CG12_big_fil_rev_8_21_14_0_65_60_17	22.2641	88.9783	84.8492	47.9357	19.6882	286.68	36.1476	116.335	107.536	60.5638	17.0944	80.3356	67.1398	37.1243	5.56327	100.578	104.664	21.2414	21.7379	11.8405	95.5384	157.241	126.95	10.7225	71.8822	181.229	129.261	12.8801	21.3262	25.394	79.0579	69.5266	136.624	70.6207	157.003	88.2704	68.6793
p__Bacteroidetes	s__Bacteroidetes_bacterium_QH_10_64_37	4.21506	40.1875	28.6766	16.0438	7.93303	111.99	8.03398	94.3032	65.6183	4.65866	8.10192	29.9403	15.9826	7.46413	7.10569	54.9186	15.4205	6.26889	0	1.49953	190.468	26.722	17.8597	2.00427	28.8262	759.299	19.7748	5.79633	4.3338	6.91564	29.2731	23.3172	20.0602	16.5144	90.5657	29.1625	35.2458
p__Bacteroidetes	s__Bacteroidetes_bacterium_QS_3_64_15	3.89467	32.1381	36.4672	19.0823	9.94763	132.455	13.4363	131.027	85.1238	7.07496	11.8698	20.4846	21.7911	11.3886	10.4722	39.1382	13.143	8.07243	5.66038	8.54322	229.155	23.7295	30.8362	8.02468	26.545	843.007	7.8136	7.55453	2.60032	4.22884	18.8882	24.5007	21.7391	20.9125	66.068	21.9491	27.6963
p__Bacteroidetes	s__Bacteroidetes_bacterium_SB0662_bin_6	36.098	250.875	255.584	109.471	22.2147	372.034	68.8401	349.897	283.715	109.447	16.4313	277.559	125.019	73.0602	13.0975	490.996	153.771	83.7571	27.9597	34.8302	445.893	315.499	153.873	9.97529	218.238	435.898	173.866	61.3492	40.403	32.3438	333.947	168.133	245.183	213.957	384.949	488.98	182.605
p__Bacteroidetes	s__Longibacter_salinarum	25.9724	124.881	134.534	67.2161	23.3116	286.662	46.7054	216.107	204.019	61.3778	32.4199	97.4654	60.0943	33.4994	22.7453	151.431	70.16	47.509	18.881	16.9774	401.248	108.024	85.5161	20.2595	91.7711	815.687	60.0242	34.1301	22.6985	22.2324	81.7654	89.0539	124.232	78.3663	326.116	98.5075	111.619
p__Bacteroidetes	s__Longimonas_halophila	19.899	50.3603	58.9732	28.7059	10.4906	134.924	30.836	119.598	91.4147	41.2476	5.53923	44.5937	42.7216	14.4377	3.31602	65.7168	28.4355	23.0361	23.6186	17.3137	229.404	62.6141	49.0361	6.80293	52.8915	378.407	40.4063	8.07013	12.4327	18.6575	47.0051	39.056	72.9112	59.3131	179.209	44.8979	48.2041
p__Bacteroidetes	s__Rhodothermaceae_bacterium	315.696	1003.42	1791.81	976.555	261.84	1770.01	550.819	1280.84	1926.82	632.842	194.53	1495.18	1060.97	473.732	108.096	1281.13	1010.64	471.777	153.758	189.255	2003.9	1740.91	1177.14	131.019	955.744	2088.98	1166.59	403.269	236.264	295.165	1017.12	984.695	1883.11	1105.13	2337.5	926.67	1069.77
p__Bacteroidetes	s__Rhodothermaceae_bacterium_RA	101.165	338.253	690.774	359.13	85.1067	635.814	187.014	462.231	792.59	204.55	64.2646	544.878	363.874	193.97	36.2993	455.345	390.991	161.534	44.3229	54.6673	837.731	629.976	430.612	44.8261	336.02	899.878	365.758	120.828	108.57	83.649	374.515	300.278	636.325	389.919	1017.35	335.222	350.08
p__Bacteroidetes	s__Rhodothermus_marinus	156.4	454.696	650.009	396.807	144.712	732.832	299.886	641.656	709.186	341.857	121.501	527.573	407.885	221.3	65.2659	494.273	410.534	211.465	93.7698	93.4938	1017.01	817.735	522.442	99.8287	461.561	1378.19	444.633	145.581	147.131	155.742	391.14	350.874	778.454	432.346	885.098	423.708	415.828
p__Bacteroidetes	s__Rhodothermus_profundi	38.9592	121.737	175.918	111.037	24.3657	200.189	75.1297	166.473	202.899	101.771	42.1413	154.881	112.326	67.3596	27.4466	131.779	113.55	67.3445	33.3172	23.7604	246.192	251.397	151.17	29.3972	118.678	357.404	138.058	32.8497	34.7652	41.538	113.615	110.887	221.181	143.042	269.795	114.719	125.202
p__Bacteroidetes	s__Salinibacter_altiplanensis	10.0472	59.1978	63.4214	33.3786	19.2934	145.878	9.38473	125.13	83.1073	17.4695	17.0433	39.6706	22.7313	16.3242	9.74027	72.7881	28.3149	28.0825	13.3093	7.21195	256.897	32.1046	22.3514	15.3897	40.2628	789.078	19.8842	17.2821	8.18295	12.2994	32.3119	41.9821	40.689	38.5369	113.009	54.1554	45.7652
p__Bacteroidetes	s__Salinibacter_ruber	55.1817	158.226	187.016	122.681	50.9649	383.518	40.4288	323.404	315.267	90.8505	47.8588	154.28	99.3163	67.8816	43.5857	185.837	98.981	69.0405	24.3251	25.858	691.034	196.706	82.5996	19.5685	131.853	2150.78	74.3995	37.9078	30.9457	51.6731	115.482	117.572	136.083	103.285	330.727	80.1591	160.999
p__Bacteroidetes	s__Salinibacter_sp._10B	19.0758	186.333	181.769	78.3621	24.4287	614.815	38.221	537.644	358.019	45.2636	33.0108	106.354	69.7225	28.7411	21.8128	200.923	96.706	40.339	16.6101	11.0424	1026.59	142.688	70.1235	8.03828	128.534	3858.61	48.5263	18.9547	21.5579	23.966	108.296	128.085	99.8055	91.9885	474.067	116.77	166.792
p__Bacteroidetes	s__Salinimicrobium_xinjiangense	14.9261	777.382	26.4063	20.966	11.8386	1562.84	25.9009	1984.68	58.0548	9.33848	21.6707	414.001	32.4332	12.0921	7.32087	126.678	139.888	205.676	1.1903	6.17768	54.5055	14.9118	32.3097	0	241.222	70.5922	116.723	13.6108	8.53787	5.63318	47.5301	30.9016	32.5136	31.3577	925.622	41.8403	18.2345
p__Bacteroidetes	s__Salisaeta_longa	21.3835	82.7269	103.633	35.4784	16.3188	199.581	26.1487	160.706	141.905	38.6121	10.1574	68.1999	42.0514	25.6738	7.86679	114.026	49.4754	35.7554	4.4853	8.11824	333.361	71.9245	45.8065	10.7674	60.6864	518.411	41.0036	26.0997	14.778	19.9515	56.4391	60.2009	82.4903	59.7394	170.613	64.4794	77.0346
p__Balneolaeota	s__Aliifodinibius_halophilus	9.35888	721.493	111.939	29.9804	17.6168	2014.82	22.3407	3290.77	3922.76	16.7485	1099.61	429.627	27.9283	37.2671	35.6282	1234.72	532.919	22.8679	3.59131	7.81805	1756.04	31.6512	38.6534	6.93186	630.053	1883.69	50.3647	11.6856	15.3478	11.1079	76.7987	108.875	43.5234	61.8095	4592.93	358.482	56.7155
p__Balneolaeota	s__Aliifodinibius_roseus	27.2759	901.137	224.806	64.8435	42.9573	3294.26	31.421	6084.4	2096.02	34.2613	530.998	481.704	78.6619	46.373	36.12	2056.32	1869.52	62.1222	43.6909	36.503	2070.73	70.1114	66.412	26.7269	796.052	2419.76	96.7129	48.2391	29.7033	24.1745	165.555	199.711	92.3108	112.606	8020.67	618.366	101.32
p__Balneolaeota	s__Aliifodinibius_saliphilus	6.75819	519.044	108.681	10.9735	10.3998	1443.13	10.3802	2320.89	2686.53	12.5033	743.867	264.222	15.8048	24.5678	13.9106	885.774	337.616	20.4729	6.49266	4.82827	1347.04	37.0528	22.9743	1.03511	412.498	1474.37	34.8503	9.19161	2.73098	12.2824	62.2125	90.2131	30.5593	40.6855	3007.1	263.711	45.5673
p__Balneolaeota	s__Aliifodinibius_sediminis	28.7155	858.989	229.324	57.2279	21.8145	2570.9	18.2543	4225.35	2087.72	30.4203	661.159	436.169	58.6294	41.2577	21.5884	1801.98	1297.54	48.6115	29.1471	18.7509	1985.69	52.0248	67.9933	18.4397	713.788	2259.91	85.2784	30.4586	20.9835	28.0338	142.004	219.153	69.783	98.4106	5360.36	602.863	117.154
p__Balneolaeota	s__Aliifodinibius_sp.	96.6016	535.93	819.976	257.956	123.998	1938.66	189.637	2061.73	3633.43	186.7	3383.17	571.272	257.9	121.129	2291.57	997.59	858.801	133.116	77.9407	85.211	1049.02	686.632	381.964	49.2775	485.605	1101.62	119.106	136.227	95.8088	282.205	277.97	521.925	386.171	417.807	2195.78	298.951	1735.1
p__Balneolaeota	s__Aliifodinibius_sp._WN023	13.1638	847.332	159.119	37.4508	7.4804	4641.67	12.7451	5619.41	7642.78	10.2588	2290.61	561.856	38.6675	34.2096	27.1999	1567.76	922.763	31.8226	3.92731	2.9374	1981.24	35.7409	38.9536	10.6102	793.577	2354.56	72.456	9.11696	9.72798	9.94637	88.4614	139.306	48.8613	74.2543	5683.44	406.545	57.6618
p__Balneolaeota	s__Balneola_sp.	15.216	243.508	127.256	55.2725	29.8364	593.708	31.2394	666.664	449.72	37.2617	127.724	191.888	69.1349	31.5462	23.1532	1954.1	904.763	33.6406	12.044	9.54704	536.542	66.2888	79.8962	14.2483	172.896	611.276	97.4178	35.0205	16.867	26.1924	74.7951	322.223	74.9922	92.9677	1455.48	237.511	250.066
p__Balneolaeota	s__Balneolaceae_bacterium	75.6343	525.028	248.364	168.038	54.8108	1134.18	67.7157	1209.41	719.883	85.1857	199.937	275.094	123.829	73.2166	57.4582	2530	663.515	77.806	46.6947	47.5814	1476.8	178.777	142.477	23.8022	357.312	1204.98	185.718	157.838	93.0805	52.7604	163.814	410.352	226.296	164.402	3702.28	580.368	432.921
p__Balneolaeota	s__Balneolaceae_bacterium_YR4-1	15.8146	2914.13	659.599	134.741	14.4405	13151.1	24.4822	10378.2	5564.22	25.5757	2614.55	1667.84	91.4223	164.781	76.1553	11351.1	3457.07	42.2595	20.2625	13.3025	6606.21	97.0023	191.852	15.525	8883.28	8216.09	179.042	33.8685	18.7959	17.9818	370.296	1981.19	91.0916	922.741	30099.5	1686.23	202.306
p__Balneolaeota	s__Fodinibius_salinus	3.63338	391.791	64.4426	11.5835	0.827723	1268.01	3.59755	1913.09	2358.56	5.56155	584.689	236.015	15.4759	12.1514	9.39685	699.737	336.683	12.2782	4.49274	4.23311	950.365	4.86809	24.4695	2.62217	380.783	1102.7	30.8392	8.74377	5.30343	6.80733	41.5362	71.5074	16.9475	28.6572	2697.73	235.178	23.8013
p__Balneolaeota	s__Gracilimonas_mengyeensis	10.5836	168.334	64.5128	25.7266	3.95328	371.795	20.4564	413.064	332.975	8.74815	54.2393	78.2683	22.8842	14.6955	15.4769	615.388	301.554	13.1682	5.53052	4.45764	390.757	30.6287	32.7741	1.79313	93.2607	312.601	32.3474	10.2876	4.39276	10.2709	29.9431	96.9475	38.7443	33.5563	1151.37	126.718	120.417
p__Balneolaeota	s__Gracilimonas_sp._8A47	17.5368	105.569	55.0177	28.6188	20.9099	279.336	7.43807	261.507	152.072	15.7037	39.9056	52.4113	26.3423	17.0844	13.9706	312	99.7779	23.7505	13.194	9.45952	335.179	36.6899	33.5408	10.8185	118.464	237.188	22.1876	30.1211	12.0256	12.7337	40.6052	75.375	36.2057	36.6089	578.722	108.893	73.6244
p__Balneolaeota	s__Gracilimonas_tropica	5.85125	95.2905	21.343	7.54427	6.20054	240.677	9.41498	258.813	173.419	8.41726	78.7115	68.6164	12.7852	7.66314	17.8676	447.664	488.236	14.7927	3.01522	1.77691	250.545	20.6615	18.9759	4.0974	96.8836	240.281	21.9337	14.3909	11.1466	5.99712	22.5007	83.0374	19.3592	30.1791	652.266	72.8397	136.56
p__Balneolaeota	s__Rhodohalobacter_barkolensis	6.34863	69.0441	50.7163	15.207	5.84807	250.496	15.4898	237.883	171.947	12.1996	36.8631	36.8877	14.6667	5.74295	8.49416	314.938	85.2094	8.43861	1.45841	0.251586	228.343	16.8962	17.3724	4.7503	69.8197	243.616	22.585	6.5863	4.37775	4.1051	19.2167	42.3604	24.8698	18.4296	548.463	117.017	70.8616
p__Balneolaeota	s__Rhodohalobacter_sp._SW132	12.0058	199.429	109.898	64.6254	16.2206	372.114	26.0041	517.096	290.222	18.8545	54.8689	102.015	55.6196	19.1781	24.9261	609.494	165.734	43.993	8.50602	13.3381	340.986	82.1756	65.8143	5.64263	131.261	345.773	51.1744	31.5028	13.5805	14.3124	80.0374	107.02	60.411	74.6852	1078.7	229.523	92.8506
p__Calditrichaeota	s__Caldithrix_abyssi	60.086	110.61	140.287	81.8761	51.0651	107.852	74.8498	103.379	135.423	94.4194	144.773	102.448	85.9325	46.402	128.862	109.188	79.9002	100.846	52.3306	39.5023	154.057	104.016	79.6892	55.4942	95.9973	134.85	71.3808	91.5235	55.6578	53.7341	60.2162	85.9454	128.747	101.528	140.02	52.1172	151.624
p__Calditrichaeota	s__Calditrichae_bacterium	36.763	63.5296	205.081	76.1632	31.1692	112.287	37.3151	105.398	200.98	44.7173	146.751	54.0832	46.0156	37.4947	77.2321	108.736	64.0502	31.056	22.266	21.4154	155.025	66.652	57.3266	37.6028	81.3335	100.804	37.0529	43.1912	21.7677	23.2984	39.3175	62.7134	61.9533	59.9204	116.874	34.7223	163.511
p__Calditrichaeota	s__Calditrichaeota_bacterium	861.134	1648.18	2820.2	1959.89	702.406	1792.63	1015.61	1453.33	2216.3	1280.79	984.544	1883.94	1336.15	866.086	923.917	1833.67	1240.94	904.248	554.848	556.799	2832.44	1813.53	1360.44	478.918	1884.75	1980.77	996.968	1093.79	916.07	796.232	1059.93	1428.11	1636.23	1381.09	1885.93	841.984	2612.51
p__candidate_division_Zixibacteria	s__candidate_division_Zixibacteria_bacterium_SM23_81	42.6792	70.1612	59.9804	54.084	33.3227	105.806	52.8528	67.3452	83.1866	45.2781	46.457	99.2428	37.9465	33.906	50.2614	65.6865	34.6862	52.5823	18.5182	16.7357	107.604	53.9702	42.5728	19.3558	67.9393	93.4947	52.4692	54.2722	41.6918	30.0626	49.4051	47.3564	70.6921	60.3035	60.4259	18.5872	80.693
p__Candidatus_Abyssubacteria	s__Candidatus_Abyssubacteria_bacterium_SURF_17	39.3423	125.735	117.435	77.5155	39.6675	141.541	36.3216	69.4693	118.258	70.1331	102.915	88.873	79.4565	45.5686	131.268	72.9674	52.3298	43.9018	42.2689	19.1155	172.975	89.544	86.7626	33.1563	122.457	77.8533	43.3763	70.6755	26.2266	46.5358	58.2733	79.503	71.9739	75.9459	89.9171	67.4708	190.338
p__Candidatus_Abyssubacteria	s__Candidatus_Abyssubacteria_bacterium_SURF_5	40.2908	86.3281	87.9629	79.2497	45.9995	132.959	33.747	61.9906	92.6927	63.3782	78.7227	35.3875	66.2812	29.3776	124.441	80.9298	51.8277	35.6189	16.3406	29.5413	167.433	61.9893	50.0183	27.6892	69.6544	93.2788	42.3192	54.9085	32.4136	34.6666	34.6416	64.1536	53.0432	36.3808	67.511	51.9527	145.781
p__Candidatus_Aerophobetes	s__Candidatus_Aerophobetes_bacterium	26.747	47.2498	62.4092	64.2774	33.4165	62.8543	57.9529	57.9305	77.2344	62.0778	128.839	64.6879	50.611	44.9423	95.1839	39.6235	42.8169	25.2975	20.0188	13.2213	159.214	72.4708	49.8461	14.0521	66.0998	87.8937	26.2079	46.1209	27.0862	26.8767	44.7	51.8635	74.0907	59.3468	87.8183	33.65	64.7454
p__Candidatus_Bipolaricaulota	s__Candidatus_Acetothermia_bacterium	82.105	179.313	266.316	175.535	104.837	218.004	76.2967	208.343	271.744	128.068	212.884	180.117	157.938	119.641	219.956	307.214	171.419	126.562	73.0697	76.8086	397.754	184.259	141.606	101.214	202.958	358.447	111.174	110.182	71.1905	104.604	169.448	168.063	156.415	198.076	274.016	147.1	273.92
p__Candidatus_Bipolaricaulota	s__Candidatus_Bipolaricaulota_bacterium	15.6077	48.3742	71.0819	44.4467	10.0413	45.493	25.8012	37.8384	82.2461	47.1751	102.677	25.5137	39.4826	47.2739	108.149	150.741	34.13	38.5969	29.8553	21.7538	103.495	58.5393	37.1886	18.3303	57.0197	140.332	25.589	21.4557	20.0913	28.838	38.1373	44.6893	38.8148	38.1883	31.4098	24.468	71.2548
p__Candidatus_Marinimicrobia	s__Candidatus_Marinimicrobia_bacterium	405.417	705.518	900.352	715.233	312.087	785.575	494.53	632.103	895.302	561.062	662.325	652.451	636.206	518.801	531.266	802.954	545.715	384.297	352.104	261.988	1083.99	715.129	637.329	225.124	764.192	827.252	446.668	539.525	374.545	450.422	472.312	657.378	743.834	602.49	781.66	567.048	830.577
p__Candidatus_Omnitrophica	s__Candidatus_Omnitrophica_bacterium	238.143	271.247	411.368	312.353	178.412	287.671	273.683	203.835	373.713	310.65	204.257	277.678	268.016	191.431	349.097	343.08	239.434	198.284	134.815	171.16	536.723	289.339	297.597	140.904	350.782	421.408	171.31	385.207	240	200.808	167.736	269.73	278.026	284.692	384.612	172.974	460.817
p__Chloroflexi	s__Anaerolineae_bacterium_SM23__63	47.1891	436.781	366.688	103.108	91.7974	136.76	144.844	213.849	907.409	94.5202	1071.91	57.1696	96.3633	68.6372	1500.34	251.693	289.026	47.5263	50.1265	60.0509	516.228	216.055	111.283	74.3168	403.816	766.903	44.815	64.8709	63.413	77.3101	212.949	336.363	137.947	299.535	217.528	73.1094	895.373
p__Chloroflexi	s__Ardenticatena_maritima	79.8531	343.819	437.025	304.196	110.547	354.391	154.249	395.556	1166.74	139.951	199.411	279.361	155.737	149.853	218.617	445.548	175.133	138.023	79.0537	60.3478	1127.9	1002.98	223.238	53.2365	1209.22	822.103	108.876	106.841	90.6161	91.3478	296.271	219.67	220.053	283.914	745.186	178.425	321.497
p__Chloroflexi	s__Chloroflexi_bacterium_RBG_13_66_10	34.0387	245.715	144.556	54.3181	45.4647	75.9514	139.235	116.451	432.071	47.1886	156.827	44.9338	53.066	62.8323	205.249	122	145.335	31.0533	18.9027	36.4634	316.244	100.676	65.9078	35.5653	190.972	428.901	22.5121	28.0301	28.6009	41.114	144.4	108.689	86.3906	153.536	117.63	32.1157	346.365
p__Chloroflexi	s__Chloroflexi_bacterium_RBG_13_68_17	49.0017	509.286	230.538	114.341	106.602	121.021	221.237	246.423	811.547	76.7263	288.908	100.807	126.602	101.946	516.346	247.535	284.612	58.1691	35.951	66.3147	555.013	248.194	104.78	60.192	433.966	813.902	40.2487	61.6981	44.5639	85.7815	279.831	224.194	166.448	270.82	177.178	52.3898	578.979
p__Chloroflexi	s__Chloroflexi_bacterium_RBG_16_48_8	72.2873	265.782	233.06	134.969	108.118	89.406	192.685	140.386	495.004	91.1334	445.072	89.18	88.3805	72.1173	568.734	166.637	179.74	50.4484	77.1625	60.0796	366.165	198.009	143.112	70.005	237.477	466.985	38.683	102.29	62.5443	74.6674	159.271	219.984	121.166	231.648	188.219	39.5298	539.278
p__Chloroflexi	s__Chloroflexi_bacterium_RBG_19FT_COMBO_62_14	105.615	925.396	597.048	245.6	233.182	226.385	399.74	383.238	1500.45	164.358	457.28	170.183	227.558	199.076	530.707	424.739	514.161	86.619	122.801	122.644	986.048	516.301	280.288	173.932	805.329	1465.63	98.3887	119.108	106.29	196.138	487.272	426.481	274.433	536.233	361.004	110.835	1226.04
p__Cyanobacteria	s__Leptolyngbya_valderiana	43.0844	134.269	116.774	95.2347	44.9538	139.919	38.6394	119.455	100.742	64.9095	50.6822	144.152	85.5826	53.3668	65.7464	266.605	90.7301	51.0703	22.6544	30.4727	298.742	141.667	69.3919	7.54427	124.626	89.9366	77.9841	129.875	59.1899	69.3182	81.5786	193.332	102.201	86.6333	145.762	106.604	95.5938
p__Deinococcus-Thermus	s__Deinococcales_bacterium	49.5358	123.849	64.3848	51.8911	53.662	656.791	50.6854	713.219	152.993	41.2385	275.177	72.3038	59.3341	52.7116	826.486	169.667	422.763	53.8708	63.0406	48.7309	682.475	45.6007	54.1914	97.261	98.5453	699.271	79.3261	73.7049	31.2319	35.478	140.22	204.762	65.1012	61.9785	184.262	127.023	425.706
p__Deinococcus-Thermus	s__Deinococcus-Thermus_bacterium	179.444	394.559	240.506	197.336	205.276	1335.88	106.88	1730.51	485.695	215.686	836.206	272.31	265.687	211.715	2645.48	267.207	720.797	178.856	99.5958	123.986	1948.38	234.3	183.972	58.4167	230.207	1084.22	231.902	148.261	113.99	121.447	320.044	475.01	222.798	219.549	453.922	350.152	1257.81
p__Deinococcus-Thermus	s__Marinithermus_hydrothermalis	40.5257	150.307	108.336	79.6878	50.888	170.539	29.6442	168.532	98.6181	55.4096	52.1342	102.523	77.8908	78.71	73.2792	108.061	89.9002	55.5054	43.9713	43.2473	204.274	130.285	58.7016	27.9123	127.104	165.333	45.0304	50.6357	31.0501	57.1895	96.3595	93.5566	100.066	105.702	153.882	89.4287	144.233
p__Deinococcus-Thermus	s__Truepera_radiovictrix	90.937	167.639	106.761	150.226	126.789	738.432	90.3883	704.376	201.32	115.472	324.025	128.684	119.537	104.016	888.242	258.224	313.652	132.706	56.1292	86.0912	683.825	124.824	107.253	103.674	173.433	755.866	126.559	106.855	85.4795	73.9858	164.773	229.356	119.022	158.111	256.667	169.896	446.738
p__Deinococcus-Thermus	s__Trueperaceae_bacterium	82.4939	233.022	123.161	116.782	94.4972	963.854	95.2451	978.258	275.291	88.3775	537.093	156.92	109.771	100.836	1496.2	256.029	453.537	110.329	61.4041	77.9019	1033.17	126.225	109.874	88.3082	191.788	1030.7	123.575	106.186	62.2024	75.382	224.297	343.819	124.268	134.652	334.135	212.614	724.839
p__Firmicutes	s__Oceanobacillus_sp._HTM_045	1549.4	14884.2	7317.88	4956.58	842.387	18611.4	876.591	6753.7	5227.8	1288.17	1343.42	3475	3617.43	2664.77	918.264	14610.2	5089.56	3627.6	931.534	853.529	9409.8	4396.93	4178.8	553.357	6956.78	6052.09	2853.91	2174.01	1533.2	769.219	6043.07	11688	4318.45	4302.87	9780.2	16838.9	5956.48
p__Firmicutes	s__Syntrophomonadaceae_bacterium	45.411	50.4049	38.8215	45.2639	58.6579	78.3073	55.629	60.0308	84.1663	73.325	51.7109	73.1711	61.132	66.8732	68.3742	59.4782	48.136	66.1899	62.1717	63.6986	81.7893	56.0054	51.2298	71.5532	50.7589	87.688	63.3845	37.706	33.2453	45.8073	50.3585	49.5975	64.2719	45.7712	78.7069	38.4386	75.2913
p__Gemmatimonadetes_d__Bacteria	s__Gemmatimonadales_bacterium	7927.77	19999.2	20707.6	12527.5	7957.05	45831.5	15310	38812.6	21147.6	8986.72	2967.65	17509.2	9759.26	11137.5	2180.37	12390.2	17015.1	5570.62	11549.4	7051.74	39091.8	10001.9	10507.4	8060.35	19062.5	45868.5	13591.1	7737.51	5886.32	8474.5	16811.1	14927.3	14136.5	12740.6	23174.4	7242.59	18378.1
p__Gemmatimonadetes_d__Bacteria	s__Gemmatimonadetes_bacterium	19369	64130.6	70560.3	35086.3	26325.7	116762	28288.9	118693	70444	25105.6	18875.6	48736.5	29693.6	27708.9	12282.6	50260.2	51176.1	21554	20408.2	19795.4	148378	36042.4	29694	17506.9	59612.9	123138	32636.4	24679.6	15198.7	20468.6	41936.5	63394.3	39470.2	36580.9	89963.6	61689.9	64728.6
p__Gemmatimonadetes_d__Bacteria	s__Gemmatimonadetes_bacterium_GWC2_71_10	117.48	110.24	109.993	129.864	120.103	198.776	156.746	171.589	102.785	125.673	13.7305	175.644	115.938	130.943	5.81155	88.8353	105.065	64.1918	82.4464	108.594	181.354	85.4107	105.489	61.1303	146.744	208.708	128.63	133.159	74.616	85.3257	116.359	88.3995	127.634	120.783	108.559	53.2864	109.51
p__Gemmatimonadetes_d__Bacteria	s__Gemmatimonas_sp.	677.615	1218.04	1286.64	1121.24	947.991	2259.17	683.748	2076.33	1195.09	822.148	105.808	1652.75	1154.31	765.671	63.9166	1014.08	908.71	1310.04	627.099	620.711	2602.6	779.164	869.624	549.631	1730.93	2398.79	1211.06	693.643	840.576	833.346	1399.7	1050.25	1234.97	1078.31	1981.66	1636.12	879.133
p__Gemmatimonadetes_d__Bacteria	s__Gemmatimonas_sp._SG8_17	220.837	796.838	728.405	517.042	216.91	736.135	257.71	771.058	640.069	296.422	248.205	473.379	375.331	343.555	206.226	469.069	525.305	241.757	180.63	116.011	897.389	432.538	395.621	110.327	1010.01	740.099	294.041	261.641	202.655	210.214	461.498	476.299	452.638	417.705	504.181	260.213	931.517
p__Gemmatimonadetes_d__Bacteria	s__Gemmatimonas_sp._SG8_23	465.991	2616.29	2275.01	978.618	139.547	2691.63	238.428	3359.32	2157.59	569.284	959.556	1856.06	1214.51	477.399	549.092	2115.44	2144.95	568.866	155.035	141.704	2538.22	1064.09	1190.06	137.396	2217.35	1963.84	997.933	840.177	217.499	438.869	1523.1	3886.29	1645.62	1406.35	3023.27	4537.57	1468.39
p__Gemmatimonadetes_d__Bacteria	s__Gemmatimonas_sp._SG8_28	282.058	818.75	779.235	554.97	231.879	1085.61	337.447	1030.99	738.657	337.904	674.49	633.593	398.057	468.657	740.653	600.294	667.398	237.695	168.507	202.425	1243.98	462.074	395.676	139.89	1203.26	1033.52	389.082	330.005	199.74	315.837	610.531	589.094	562.174	492.415	814.947	344.194	1015.28
p__Gemmatimonadetes_d__Bacteria	s__Gemmatimonas_sp._SG8_38_2	116.42	579.229	543.822	246.755	106.475	914.663	128.833	1102.95	656.765	167.586	473.957	391.477	226.143	292.99	383.318	484.32	364.572	177.862	81.3896	79.5806	1201.95	314.984	245.307	64.7565	573.793	1092.59	199.132	130.924	141.656	169.373	356.768	387.414	349.555	319.328	521.343	250.742	2364.89
p__Gemmatimonadetes_d__Bacteria	s__Gemmatimonas_sp._SM23_52	228.688	1728.74	1150.07	632.686	224.015	2404.56	225.442	3441.36	1732.41	342.116	246.884	944.424	448.458	961.445	297.974	1268.24	800.187	328.875	182.55	172.9	3621.86	684.023	430.211	128.668	1610.44	3658.55	405.74	224.35	171.716	358.854	801.293	711.521	632.688	680.38	1170.45	413.147	8856.72
p__Proteobacteria	s__Acidiferrobacteraceae_bacterium	266.983	882.784	898.342	287.927	298.186	1325.46	157.034	1312.02	1197.11	386.765	291.984	438.537	430.95	352.456	239.66	668.777	642.185	216.858	192.329	152.132	839.998	648.393	434.953	124.041	619.624	477.084	320.441	278.933	168.598	249.002	366.868	432.979	525.57	426.04	1828.96	412.681	549.669
p__Proteobacteria	s__Acidihalobacter_prosperus	48.4744	193.905	94.9668	98.6392	17.6086	218.203	50.0552	220.247	108.835	53.6547	197.255	80.2149	60.8463	58.4228	336.866	182.268	153.384	58.9216	26.2529	24.7037	160.19	111.841	56.4723	30.9573	118.645	87.1647	74.4077	57.6691	35.7749	46.9838	83.7941	110.762	81.6519	81.981	184.025	91.9028	250.203
p__Proteobacteria	s__Acidithiobacillales_bacterium_SM1_46	35.4285	93.9671	72.7433	78.3766	16.889	102.67	61.4165	90.6534	91.3589	33.5106	91.069	44.9895	42.8826	47.4723	65.7192	88.7439	77.462	25.617	35.7089	22.2253	92.4103	50.2175	32.8338	23.7666	86.737	42.3839	20.9539	24.986	30.5074	31.367	41.1291	59.0994	40.5621	43.9968	127.955	46.172	76.051
p__Proteobacteria	s__Acidithiobacillales_bacterium_SM23_46	39.6779	126.69	116.422	99.1257	26.9564	158.78	66.9334	143.086	122.225	61.7847	118.855	47.9737	61.0025	64.9649	137.319	132.964	117.553	41.4762	24.9798	42.7219	115.797	86.1692	66.7147	15.3474	130.345	65.1219	51.194	73.2901	26.2787	43.2053	68.7636	86.2868	67.1002	70.5038	149.533	75.9197	138.666
p__Proteobacteria	s__Albidovulum_xiamenense	66.0073	347.228	183.41	154.692	32.3765	389.696	36.4374	172.08	127.554	70.0671	115.402	97.5665	99.9109	83.9606	179.307	400.244	133.928	88.3696	32.0006	25.6716	277.604	144.026	111.473	26.7077	171.117	129.618	84.7843	64.8228	62.5698	36.8381	166.247	338.322	142.605	143.357	228.052	406.813	144.066
p__Proteobacteria	s__Albimonas_donghaensis	111.325	442.289	226.408	227.682	46.3652	629.663	47.8775	206.526	172.987	77.497	287.326	129.464	179.837	153.705	365.134	612.466	310.121	161.652	65.5005	62.3682	262.737	171.699	209.084	30.933	304.848	178.782	162.498	120.184	82.9968	51.1355	245.984	428.65	248.633	224.181	335.961	615.461	213.114
p__Proteobacteria	s__Albimonas_pacifica	150.391	1008.99	547.488	529.446	114.121	1267.61	110.684	462.433	364.354	142.41	546.402	321.836	415.928	249.564	628.075	1336.42	602.214	366.662	112.06	111.675	649.657	364.025	415.651	61.0778	576.712	383.085	313.473	182.005	191.115	92.9631	512.164	933.285	441.412	436.796	702.558	1356.3	432.367
p__Proteobacteria	s__Algiphilus_aromaticivorans	101.476	205.187	45.4061	90.3889	13.7917	729.469	87.3093	497.768	75.5631	127.501	24.6831	70.4831	111.62	101.498	18.8063	482.277	569.027	41.1103	42.0265	26.7999	246.5	117.641	104.141	77.2433	82.8651	227.24	81.3432	51.8641	44.4642	49.4174	79.4229	71.7146	98.3885	33.9385	224.064	63.5543	76.385
p__Proteobacteria	s__Alkalilimnicola_ehrlichii	88.6406	299.628	190.888	154.464	66.2394	552.438	53.1884	451.908	246.084	118.081	147.433	171.634	108.749	121.299	371.903	387.171	219.036	120.173	61.0131	54.8698	342.827	146.41	130.405	53.8126	205.691	240.749	131.311	82.6346	60.5567	93.9857	161.532	178.471	138.674	142.441	544.425	199.574	161.03
p__Proteobacteria	s__Alkalilimnicola_sp._S0819	39.4133	157.556	79.9487	49.2815	29.3242	313.769	25.7366	267.295	132.828	43.9825	70.0039	61.123	48.7421	40.2326	94.727	167.421	108.65	33.1278	21.6552	30.7231	167.435	67.6874	40.4871	12.5354	87.2414	131.77	56.9298	71.3083	29.2713	36.7965	64.6551	106.327	66.2523	56.7671	372.973	100.866	88.6482
p__Proteobacteria	s__Alkalispirillum_mobile	10.7182	93.0525	53.2027	26.7098	12.9658	171.074	13.5891	159.448	71.1047	18.2511	33.2228	36.1569	34.3761	18.2559	54.2423	97.4733	71.1505	25.6792	13.7524	3.71722	114.08	33.8354	26.6897	4.72353	55.2568	75.1209	23.383	13.9418	9.41966	28.8392	35.7379	49.528	23.9536	42.1025	181.797	38.7941	62.1166
p__Proteobacteria	s__Alphaproteobacteria_bacterium_HGW-Alphaproteobacteria-2	42.9374	237.645	125.284	100.313	25.708	280.071	15.8738	123.521	90.592	34.4881	95.1816	79.8462	81.1952	69.6517	121.99	266.047	113.72	74.3199	24.0319	27.2581	141.616	112.42	83.456	16.1257	147.201	72.359	75.3642	46.8617	38.9954	18.4472	125.229	208.644	93.464	97.3107	145.506	262.763	114.511
p__Proteobacteria	s__Aquisalimonas_asiatica	41.3168	204.388	125	83.0483	40.702	382.701	30.5586	404.636	183.323	55.5236	41.6473	109.325	72.7607	65.0529	64.514	219.695	132.246	68.8174	28.5375	40.7266	283.095	120.365	74.5575	27.5197	124.139	226.806	83.2216	55.9047	55.8397	59.622	102.398	113.418	82.4252	106.831	309.427	117.268	85.7044
p__Proteobacteria	s__Arenicella_xantha	24.427	85.2864	82.7939	14.1348	2.43152	158.112	10.1884	190.628	140.635	8.24292	83.5917	28.6345	21.372	8.02372	38.1068	97.0185	39.4087	37.409	4.88141	9.32163	79.5718	26.9198	18.0784	7.19334	42.7922	52.7848	23.6816	50.5293	18.9997	14.6165	35.836	36.4556	22.0681	25.3089	269.878	24.8159	43.41
p__Proteobacteria	s__Arhodomonas_aquaeolei	27.2662	153.586	96.907	49.5228	30.8339	378.384	27.911	326.723	162.015	33.2997	32.9143	67.1735	38.7414	34.4566	37.0528	150.296	87.3933	33.6787	15.4116	21.0398	293.995	70.9736	39.8918	21.6664	95.5393	214.603	49.1156	40.754	17.5399	30.1702	62.0948	83.5222	40.0214	52.4	353.915	80.7035	69.2969
p__Proteobacteria	s__Arhodomonas_sp._KWT	22.0253	119.871	72.4706	39.0926	23.7339	267.612	22.4177	234.338	123.792	20.7834	20.9189	67.3344	39.4472	26.7059	24.1028	80.8285	62.1241	25.4195	9.70988	23.1511	243.787	61.8369	43.2373	8.2776	82.3563	167.829	31.7941	41.0832	21.8377	29.1523	62.6329	50.0381	41.4532	40.3685	235.984	61.8282	46.6556
p__Proteobacteria	s__Bradymonas_sediminis	11.8946	59.223	45.0382	39.0601	20.9828	59.1934	11.95	122.21	67.3124	17.278	30.7473	26.561	29.1672	21.5237	41.4794	111.829	171.515	34.216	12.6901	33.5113	138.229	35.979	24.1911	9.80876	176.873	179.914	23.7565	31.0364	26.1579	20.1359	31.1576	50.4307	29.729	20.9221	68.6702	36.9063	62.6387
p__Proteobacteria	s__Bradymonas_sp._YN101	98.984	390.284	272.803	263.242	98.9971	606.897	88.3016	1519.78	444.944	122.774	196.058	258.231	259.61	128.865	186.463	1032.66	2052.27	172.744	94.818	94.6343	1157.23	182.325	186.54	58.1974	1863.13	1238.53	216.815	168.503	128.096	88.4672	210.722	342.568	222.381	211.933	501.505	221.953	497.307
p__Proteobacteria	s__Candidatus_Kentron_sp._DK	21.5052	101.638	97.4558	78.6636	33.0439	84.0434	30.3397	73.6043	121.511	29.1665	62.2085	71.5029	41.6346	38.8682	49.7751	211.67	49.7181	63.5077	15.1288	29.4268	68.0044	137.08	52.1314	16.3619	91.5618	61.2565	45.2356	30.755	61.9678	33.4817	55.1089	69.4453	66.882	68.1056	80.7349	67.9505	79.4802
p__Proteobacteria	s__Candidatus_Lambdaproteobacteria_bacterium	87.4406	152.238	178.063	103.596	62.6597	104.925	56.4204	135.727	186.834	96.1035	45.4259	147.568	121.573	97.3583	67.8878	161.388	135.059	69.9702	41.9782	54.1681	302.981	185.246	103.4	27.9654	160.617	126.398	96.9135	95.696	53.7603	83.6473	83.2479	135.538	106.362	107.467	83.4263	127.456	118.59
p__Proteobacteria	s__Candidatus_Muproteobacteria_bacterium_RBG_16_64_11	16.4402	138.954	80.6004	19.5032	23.5656	145.092	42.3192	177.252	114.86	16.9407	33.6268	37.3271	24.2868	41.3873	82.5481	66.2588	104.145	19.8827	5.12159	13.3062	131.658	66.3839	26.8339	9.64167	80.2253	72.0644	21.1164	12.6872	26.6384	25.9467	48.1404	52.1846	20.7501	27.6708	195.113	54.0115	64.6975
p__Proteobacteria	s__Candidatus_Muproteobacteria_bacterium_RBG_16_65_31	10.7083	129.032	81.9757	64.783	3.31522	131.914	66.1398	144.948	115.853	21.5531	26.7349	31.9452	14.7501	73.7507	48.2792	57.2937	85.4745	22.8197	2.49382	12.9558	97.5741	66.8312	32.7861	10.9913	91.4989	46.1989	25.9396	20.3527	12.728	41.1877	64.4408	51.9157	17.4062	41.7051	194.647	41.814	55.83
p__Proteobacteria	s__Candidatus_Muproteobacteria_bacterium_RBG_16_65_34	44.4859	293.283	199.767	261.032	41.2955	277.63	80.822	308.411	251.792	79.0439	96.2623	99.8169	71.7681	179.489	169.196	252.32	187.32	52.3517	21.2618	54.882	249.41	168.768	102.04	34.9527	239.81	139.497	79.6418	66.8371	30.7673	85.5608	139.688	156.103	114.709	122.506	343.056	82.8443	146.623
p__Proteobacteria	s__Candidatus_Muproteobacteria_bacterium_RIFCSPHIGHO2_01_FULL_65_16	18.8094	101.141	70.7182	51.1949	5.34631	143.023	47.4939	113.592	95.8239	15.5661	21.5608	26.1143	19.7506	80.7659	29.7224	70.2851	60.4577	11.9277	5.18351	8.21665	119.259	48.9359	20.3765	13.0654	65.8403	66.6653	12.1203	14.5773	7.09751	25.3122	43.8758	35.193	28.3893	33.9503	122.133	21.8205	50.1412
p__Proteobacteria	s__Chromatiaceae_bacterium	124.053	273.05	397.26	276.98	95.6182	322.752	144.326	277.184	413.975	171.822	661.776	267.293	247.917	127.893	609.982	512.927	291.984	143.09	62.0882	61.8948	351.057	267.152	245.481	44.6275	215.103	408.818	176.905	134.375	90.569	111.434	181.825	289.47	266.982	244.044	396.99	235.152	503.582
p__Proteobacteria	s__Chromatiales_bacterium_(ex_Bugula_neritina_AB1)	43.4759	143.175	129.664	93.7533	38.8251	169.742	29.249	127.71	115.085	53.3752	83.1678	91.3655	75.9283	70.6917	100.762	140.406	93.237	65.2374	25.2083	34.4655	139.205	123.351	90.4285	20.5477	114.525	63.4749	77.1802	52.4341	32.7566	51.2303	73.6597	110.583	101.113	73.6576	114.482	152.948	72.1192
p__Proteobacteria	s__Chromatiales_bacterium_21-64-14	52.3265	247.385	187.303	128.793	59.7359	292.661	57.7586	291.163	190.984	73.9846	112.916	139.153	78.0757	100.626	180.963	305.189	188.947	93.7477	30.1597	42.3341	214.69	159.284	88.8167	24.3852	190.33	134.041	76.6706	72.6622	51.1114	78.3146	116.709	153.096	118.182	122.58	221.774	164.594	207.441
p__Proteobacteria	s__Chromatocurvus_halotolerans	34.6543	125.552	82.0927	98.2112	17.7505	146.561	13.9093	179.904	76.5642	20.6766	50.6331	45.2294	58.1145	47.8302	63.1892	247.815	92.0654	39.6213	8.34904	12.1847	128.76	42.5766	56.5001	5.05563	64.0458	76.9613	57.641	44.0062	9.90787	24.8984	74.8291	134.267	58.6585	77.0855	160.81	157.561	118.594
p__Proteobacteria	s__Dichotomicrobium_thermohalophilum	182.362	525.697	1018.51	359.818	132.899	2343.42	125.259	2375.35	690.841	186.891	227.66	323.23	300.981	250.969	212.965	536.943	347.176	262.906	147.593	109.559	1334.16	390.416	251.748	101.534	340.776	1242.92	230.224	140.356	154.384	176.189	296.407	501.903	275.533	293.042	6113.13	1098.89	332.581
p__Proteobacteria	s__Ectothiorhodospira_mobilis	29.4316	102.368	61.9429	38.137	13.2558	148.093	9.33365	137.134	87.8499	25.6448	48.7317	36.4929	31.3824	24.2814	110.157	133.309	64.0039	18.9141	17.8426	15.8124	105.325	62.8436	27.9932	11.1708	60.4591	69.3111	26.4635	26.4828	15.8341	25.0333	43.9866	65.4437	37.7847	35.6086	121.311	36.903	86.9582
p__Proteobacteria	s__Euryhalocaulis_caribicus	36.2849	93.2982	84.3799	75.3778	24.4802	120.834	37.2768	103.831	57.5601	37.39	23.8376	72.1883	81.9461	40.0057	22.2084	89.1042	57.9782	43.2643	33.9942	15.2713	95.189	73.1632	61.6593	23.4957	68.7249	69.5494	47.2564	61.2443	25.059	37.9055	75.7409	92.4046	72.6108	55.9824	119.248	147.738	51.3071
p__Proteobacteria	s__Ferruginivarius_sediminum	858.702	3902.92	2770.79	1538.26	741.352	6896.94	469.752	2808.95	3350.2	1452.1	472.269	1825.73	1393.97	1396.81	439.626	2212.07	2009.06	815.388	470.617	628.52	11180	2834.51	1496.29	246.898	3045.37	7638.12	1434.36	680.023	554.43	1513.32	2054.72	2541.92	1845.93	1404.37	4233.16	2349.6	1820.36
p__Proteobacteria	s__Gammaproteobacteria_bacterium_RBG_16_51_14	18.6743	163.425	74.6644	25.1921	11.5926	347.838	26.5582	731.245	143.129	17.2619	49.6864	31.8025	32.5716	45.6933	45.2378	632.697	55.5366	17.326	11.0028	15.2487	809.911	69.716	34.7604	15.5147	85.8264	316.204	35.62	24.9647	9.92287	21.8109	47.8984	74.5737	39.1852	35.142	297.005	67.5219	60.228
p__Proteobacteria	s__Gammaproteobacteria_bacterium_RBG_16_66_13	62.4361	169.783	165.46	60.9212	46.299	63.0676	70.0136	118.026	261.904	57.0935	82.4745	60.3567	64.9917	70.0683	103.751	88.1851	112.233	38.9266	49.7866	33.5148	182.651	132.536	73.7843	47.8555	158.803	225.779	29.8247	81.0551	30.6498	50.5809	101.616	91.4318	85.4788	128.255	91.0199	81.3089	153.808
p__Proteobacteria	s__Gammaproteobacteria_bacterium_RIFCSPLOWO2_02_FULL_52_10	21.5102	70.3035	62.1104	20.5503	15.3871	79.0211	22.2491	172.316	45.1276	18.9668	22.4964	41.2363	18.9309	15.8479	8.71329	73.6736	46.6982	17.7292	10.7924	25.7972	256.903	32.1818	52.9948	14.7478	35.2159	99.792	21.0698	74.2659	17.4096	20.8611	23.4308	43.8942	38.8999	24.5554	103.604	42.2946	28.7864
p__Proteobacteria	s__Gammaproteobacteria_bacterium_RIFCSPLOWO2_02_FULL_56_15	60.7949	117.276	104.034	59.6345	29.1529	114.129	29.5857	261.82	93.6282	77.212	37.0697	95.7837	75.2885	36.7192	32.837	155.173	81.9097	36.7331	19.2049	49.5777	434.913	87.463	86.9184	39.3346	110.267	164.527	65.2164	134.337	52.2286	45.9929	64.2169	77.5533	89.4936	83.143	103.392	78.6476	43.6013
p__Proteobacteria	s__Gammaproteobacteria_bacterium_RIFCSPLOWO2_02_FULL_61_13	141.705	290.549	213.274	202.733	75.7875	248.918	117.392	618.267	195.576	120.326	54.7113	191.76	148.482	113.722	31.638	341.645	212.512	108.38	60.8306	83.1688	748.393	180.463	157.687	57.3578	183.419	363.797	113.833	365.972	86.0355	125.125	152.719	230.598	209.806	163.759	304.536	148.603	126.181
p__Proteobacteria	s__Gammaproteobacteria_bacterium_RIFCSPLOWO2_12_FULL_52_10	44.2764	82.3252	81.221	38.0721	27.4464	94.1231	29.4242	252.624	51.7977	29.6403	35.5632	57.6125	44.7374	21.8727	18.275	103.684	53.7781	29.351	23.6753	49.3149	315.573	52.4501	63.3453	13.0319	40.4971	148.343	40.8338	74.6049	40.1198	30.511	34.002	47.8479	56.8614	36.6181	100.437	69.3705	32.536
p__Proteobacteria	s__Halofilum_ochraceum	87.5931	4408.81	645.5	185.728	64.6633	10530.4	90.2795	14414.5	3249.96	97.8891	328.766	873.124	159.783	227.704	182.472	2691.37	2159.57	117.668	85.2695	67.7539	15919.6	307.743	152.968	69.3874	2704.82	15761.4	172.482	90.2883	73.9962	111.457	394.514	888.351	178.088	266.883	4890.26	480.641	374.483
p__Proteobacteria	s__Halomonas_anticariensis	41.1377	159.874	145.524	85.1078	23.0207	248.83	29.144	220.569	111.686	38.2702	39.238	90.7778	59.6611	62.0189	62.6693	142.979	106.658	57.4071	21.0616	23.709	215.106	97.7897	55.7562	17.6397	99.4891	152.404	63.9661	41.0151	42.2935	55.6854	110.189	106.871	63.9093	98.5514	245.483	132.359	80.1442
p__Proteobacteria	s__Halomonas_daqiaonensis	11.8288	60.1006	65.4546	34.1142	6.58176	337.663	3.42115	108.646	49.1672	16.0745	58.4565	41.5134	23.7918	24.908	39.4778	170.851	168.984	26.7097	4.35219	9.15942	279.11	30.7719	65.1351	2.82099	57.1515	131.984	44.17	16.6977	10.7591	7.72191	72.3525	79.1543	35.1349	80.9779	228.41	111.69	105.825
p__Proteobacteria	s__Halomonas_denitrificans	9.35485	69.2751	55.5964	15.9838	7.47229	342.141	12.9168	65.1768	34.3372	6.59123	99.8638	41.5981	15.9073	25.7084	88.7461	163.869	159.768	18.2667	5.90086	2.80222	339.369	19.9895	82.6896	3.02837	34.8401	34.8858	23.1244	5.44168	4.49393	10.0095	69.2504	183.843	29.7066	66.1273	242.715	138.935	95.1661
p__Proteobacteria	s__Halomonas_heilongjiangensis	50.6173	169.757	147.222	108.86	40.3136	232.728	38.5065	150.184	118.062	39.2481	52.2912	137.573	70.8323	100.926	97.8967	232.88	183.276	58.3543	26.9189	41.1794	474.941	105.058	102.835	22.4013	110.07	166.182	107.503	45.1031	54.2721	65.4793	156.637	172.492	119.156	154.23	390.887	295.934	109.541
p__Proteobacteria	s__Halomonas_ilicicola	25.782	69.6914	57.2482	59.2098	40.8758	116.442	23.4005	75.0307	45.0732	41.8276	25.5457	58.2361	59.805	48.3829	21.3065	94.9943	79.4588	47.3131	24.2066	29.4057	90.7859	70.4929	42.1131	18.6708	70.9303	54.0907	36.8249	15.8088	26.0592	28.254	54.0391	58.6137	69.6069	53.8483	97.039	79.9482	43.4203
p__Proteobacteria	s__Halomonas_korlensis	12.16	53.5795	69.862	47.926	17.4642	157.499	27.9558	132.598	50.8711	18.8981	30.0284	52.0092	68.0864	45.5417	41.3431	172.456	114.181	116.648	6.79757	8.17376	313.632	24.3711	87.8819	13.1479	49.4122	124.973	34.2409	16.1378	9.06913	11.4497	59.947	55.4512	50.1898	89.9566	276.609	100.908	76.9945
p__Proteobacteria	s__Halomonas_salina	9.36652	64.4467	68.0391	14.6903	4.77309	329.848	14.5312	95.3934	59.5029	8.16005	83.3138	42.2463	18.6887	25.2093	68.31	143.017	227.741	19.7496	1.55199	10.1403	150.003	33.021	65.7249	1.80739	56.6867	77.3938	39.6906	19.5488	10.3376	5.20229	79.0775	83.6107	20.5937	63.3113	259.119	126.855	158.549
p__Proteobacteria	s__Halomonas_sp._3(2)	11.2327	56.1099	55.974	32.5128	10.4268	224.461	10.705	106.202	53.3328	4.99782	44.5009	35.3612	28.036	28.6996	40.3375	148.605	149.745	32.1488	2.90696	6.57187	256.404	26.4127	41.4454	7.79392	49.3227	117.563	31.4969	19.6119	5.86151	16.0457	71.0754	58.7858	33.6116	66.8467	237.657	101.683	100.947
p__Proteobacteria	s__Halomonas_sp._LBP4	61.4085	202.358	186.791	84.4407	50.7796	380.187	19.5122	230.911	143.236	68.8573	57.1923	143.771	104.655	98.809	46.6018	384.629	183.927	72.237	28.1099	32.5072	697.181	160.095	107.861	18.4939	139.518	268.377	91.755	53.5472	37.9419	54.633	175.048	160.181	118.114	161.625	471.163	254.536	136.623
p__Proteobacteria	s__Halomonas_sp._TBZ202	31.2916	231.776	122.175	56.6647	19.9661	211.706	12.1254	157.744	105.583	46.4289	36.4719	91.5257	48.6962	53.2416	29.2108	144.381	97.8033	43.5339	16.6788	25.1539	196.278	95.3769	70.0425	5.61271	75.7138	131.424	63.0223	35.4247	28.6435	31.6863	95.4731	94.2537	62.5451	107.007	251.981	97.23	81.4911
p__Proteobacteria	s__Halomonas_urmiana	6.32412	75.3724	79.9917	8.93396	5.64189	374.051	9.85963	69.1592	42.4418	4.33751	89.9852	53.2766	15.0063	30.0576	105.221	157.377	161.952	27.7831	3.9694	4.29456	476.593	20.8115	79.4799	7.30204	43.1401	72.1603	23.4778	7.22879	7.15624	5.47578	88.3188	135.332	36.1852	94.0785	326.496	130.997	115.238
p__Proteobacteria	s__Halomonas_utahensis	1.8577	31.0574	15.1023	8.54954	4.99789	736.769	1.14959	406.217	237.286	3.19293	17.0852	10.6175	5.3025	1.26267	6.05499	29.3227	26.9286	3.53462	0.535432	1.26585	58.2448	7.62588	3.55849	0.543258	37.5704	287.296	7.85709	9.76139	1.90821	7.45622	11.5549	16.9595	7.77041	5.78262	76.2844	31.9765	35.037
p__Proteobacteria	s__Halospina_denitrificans	8.85611	72.7586	30.0515	14.727	11.3115	661.179	2.63067	1311.62	967.974	4.99229	42.0351	22.8847	13.7308	8.56737	52.7528	89.5435	121.894	13.3788	11.8719	5.16531	128.458	8.17584	17.2339	14.7699	318.293	5837.52	14.7387	11.1282	5.33303	19.0269	28.5209	38.842	16.3748	31.9229	135.949	40.3648	66.1369
p__Proteobacteria	s__Halospina_sp._K52047b	10.8975	14.6488	9.15667	6.12916	4.04832	271.976	3.25815	221.782	1061.77	16.0038	51.4095	24.4233	10.0428	2.9581	7.56005	23.4329	31.837	4.49999	3.28446	5.43847	26.0124	12.3845	11.5602	1.57069	26.5541	189.459	11.9648	16.434	8.08887	7.03743	9.78708	7.53764	15.6964	9.10279	25.4492	5.27256	31.1329
p__Proteobacteria	s__Halovibrio_sp._YL5-2	3.82121	24.5373	24.2737	2.67763	2.24875	564.868	3.9911	339.386	390.273	5.54265	16.4009	10.2535	4.51585	5.99756	4.4441	40.4206	38.429	4.88282	2.80602	1.39159	52.3051	4.67976	11.184	7.13151	34.9276	320.096	3.29934	0.544721	2.19342	5.80884	8.66933	11.0087	10.2945	5.39731	48.9672	10.677	23.8052
p__Proteobacteria	s__Halovulum_dunhuangense	420.386	1784.78	1009.13	876.585	205.305	2230.89	169.091	832.047	670.68	318.766	1526.46	658.049	703.565	510.068	1868.02	2328.47	1042.33	668.391	216.669	200.762	1092.55	682.085	758.554	124.05	1080.89	763.34	642.42	462.165	396.128	209.901	935.337	1663.26	842.015	835.607	1241.95	2332.52	895.819
p__Proteobacteria	s__Inmirania_thermothiophila	135.388	493.159	339.293	227.054	105.363	572.921	120.743	551.887	340.919	182.035	129.777	268.53	227.589	194.232	285.811	441.897	323.712	163.117	79.8494	89.0313	414.888	310.972	203.729	50.4556	317.841	298.058	141.393	159.314	88.9561	159.039	225.776	335.665	241.818	214.037	454.278	332.202	312.633
p__Proteobacteria	s__Kineobactrum_sediminis	15.2895	86.6177	66.6475	44.7217	11.1129	105.961	25.4322	145.586	57.8088	24.313	62.8015	38.3352	44.5242	88.3073	85.9986	116.807	112.015	28.5151	13.2974	19.3463	89.3703	36.1504	53.2729	2.24018	62.5483	61.7439	28.3766	28.1114	15.5346	25.1487	56.7987	64.7876	30.8639	65.6852	101.011	83.7249	110.246
p__Proteobacteria	s__Kordiimonadales_bacterium_JCM_17843	27.5987	146.656	105.336	45.5858	26.9725	133.48	18.8466	93.6489	55.0402	42.4934	21.2875	69.9862	49.3142	37.2682	38.5712	109.369	77.9535	46.6874	18.1023	16.7746	118.433	90.9998	48.9714	5.86272	88.5088	88.0646	56.0845	39.1874	29.5964	50.4664	76.4875	85.954	58.247	64.8857	69.0376	142.168	66.6111
p__Proteobacteria	s__Legionellales_bacterium	29.9106	49.4992	60.8708	25.74	7.05822	87.1341	7.90651	158.502	61.9299	21.0094	209.646	26.4594	64.8033	24.106	43.0464	185.457	39.0544	19.9927	3.60424	17.2127	144.745	46.9192	37.3352	10.4847	35.3081	76.5268	26.8024	18.7797	12.3533	20.3352	26.8511	44.635	62.4257	32.0791	65.5977	30.9293	36.5725
p__Proteobacteria	s__Limimonas_halophila	108.513	424.863	340.559	162.704	96.7681	701.531	64.5208	374.479	474.784	157.034	55.31	211.699	174.205	179.622	56.857	247.395	218.083	109.718	78.1652	84.1908	987.569	383.693	170.076	44.1456	341.607	691.385	157.674	110.08	55.0447	162.082	262.503	248.362	203.849	180.296	517.904	242.035	188.309
p__Proteobacteria	s__Marinicauda_sp._WD6-1	30.5702	143.168	128.254	67.8911	41.8267	207.254	34.5092	405.989	82.0534	43.2562	36.9124	66.0809	57.7484	49.5922	27.9694	113.054	84.469	58.3777	29.4471	26.1836	418.385	99.0957	66.1134	12.1645	91.2495	370.581	54.5304	34.7839	31.5201	55.1046	73.8579	129.177	70.7527	57.5357	125.8	158.747	89.7702
p__Proteobacteria	s__Marinobacter_changyiensis	16.5412	68.7124	56.0253	43.6821	18.4297	153.672	30.3358	170.474	47.5033	24.3531	49.0066	81.3016	40.0348	40.1776	43.8712	136.552	120.293	36.6106	8.39293	18.1056	49.9729	51.6971	30.4716	9.28431	63.3252	104.183	114.003	25.858	16.6807	20.7941	74.6534	84.7763	33.2984	52.2992	67.3765	63.2126	63.5465
p__Proteobacteria	s__Marinobacter_daqiaonensis	12.8195	92.8379	43.2519	31.6909	13.8045	175.69	22.9443	221.761	41.9643	17.8472	28.27	44.0475	31.8314	25.9393	22.2651	303.575	255.292	20.9369	4.44862	10.4183	68.6395	31.4437	29.4397	8.64263	54.1308	127.139	30.938	16.2084	14.8536	10.8658	49.793	64.3497	36.663	35.3776	95.1049	51.3723	49.5707
p__Proteobacteria	s__Marinobacter_salicampi	20.1681	75.1173	36.6652	32.9646	17.0992	387.623	8.64309	134.114	31.8886	15.7017	29.8555	43.7597	26.7852	22.4314	26.3715	122.934	70.9926	29.1042	7.75426	15.348	49.538	37.3167	23.4855	2.497	160.564	235.962	41.6379	23.5085	17.2681	23.2337	61.4116	52.784	34.7555	34.7136	64.6161	49.2369	36.1124
p__Proteobacteria	s__Marinobacter_sp._W62	10.9761	60.9006	37.8945	23.5438	2.79709	147.112	4.23781	141.076	29.6056	8.59451	47.0704	49.5979	11.4552	16.78	67.3542	224.233	123.526	20.492	2.22894	6.24141	52.3362	15.7281	19.9811	5.55508	33.1505	36.6125	74.7609	5.41008	4.88554	6.24737	95.8004	60.9311	21.1661	57.0264	40.9113	41.7112	76.5121
p__Proteobacteria	s__Maritimibacter_sp._55A14	77.689	1195.92	339.629	218.23	49.7703	612.068	40.0865	320.339	292.546	79.9547	603.248	174.091	158.249	110.671	623.988	622.863	243.974	128.822	44.2962	42.6863	376.024	203.289	185.388	41.0319	282.304	258.214	145.06	94.0142	61.6592	73.5365	269.882	484.294	203.735	212.501	360.965	748.019	259.792
p__Proteobacteria	s__Methylohalobius_crimeensis	70.0018	179.505	186.343	94.3016	63.4389	240.982	47.21	237.367	176.498	92.5535	123.807	129.01	83.9289	68.1199	269.98	281.288	130.814	82.5114	47.1813	48.3555	296.004	178.681	81.4951	54.9376	110.531	132.535	92.3919	97.3362	57.1896	69.2119	100.527	139.907	113.984	117.695	216.35	113.984	214.178
p__Proteobacteria	s__Nitrococcus_mobilis	100.66	271.618	247.662	197.871	120.329	492.273	80.1711	412.867	266.602	152.883	65.2874	368.077	178.379	159.416	107.251	319.349	192.24	166.519	61.5979	102.529	423.153	223.971	173.816	50.4944	231.683	296.976	182.311	127.218	113.627	127.417	191.045	164.914	327.08	224.873	931.745	164.558	204.46
p__Proteobacteria	s__Nitrosococcus_halophilus	193.751	540.398	703.039	502.281	219.774	754.056	172.715	520.153	620.08	244.063	222.823	518.818	318.842	247.605	397.795	1448.33	352.872	314.692	148.838	147.773	561.166	551.609	301.481	78.3249	423.801	378.374	236.55	212.002	156.866	211.355	388.815	545.888	386.563	461.353	656.595	324.01	511.14
p__Proteobacteria	s__Oceanicella_actignis	293.602	2482.43	1209.85	861.513	183.997	3005.3	212.131	1176.31	931.51	269.034	1301.8	634.162	695.174	575.047	1613.54	2372.17	1503.1	568.461	195.95	184.174	1613.47	787.81	850.478	126.45	1218.68	1000.55	608.658	396.82	329.457	144.24	1154.77	2099.46	1060.66	844.295	1575.05	3159.27	1050.43
p__Proteobacteria	s__Oceanicella_sp._SM1341	270.556	571.038	317.616	259.454	74.455	675.764	52.1458	240.653	211.939	98.0237	259.484	211.517	228.663	165.941	351.987	668.282	301.815	196.677	64.1442	54.7741	346.205	220.35	232.725	30.7178	334.339	218.555	185.844	142.298	110.879	65.8262	300.814	541.248	265.925	269.008	365.11	756.638	270.169
p__Proteobacteria	s__Paraoceanicella_profunda	73.0935	463.022	264.819	207.141	40.4828	606.859	36.4376	214.108	184.967	66.4181	196.953	158.229	155.26	138.536	237.488	556.724	249.636	177.069	53.5907	42.7564	251.736	207.294	202.679	29.8999	283.099	193.426	160.291	108.006	88.0537	59.0886	248.265	425.021	197.602	205.113	310.608	589.185	211.141
p__Proteobacteria	s__Pontivivens_insulae	30.1684	163.701	78.0241	56.6935	14.0748	171.845	11.7882	74.7728	51.4185	20.6675	118.12	42.7342	41.986	33.1489	159.151	175.311	79.7507	49.9315	6.25735	13.1886	120.88	52.7385	63.6854	7.68115	86.0866	72.8935	44.1736	35.1693	24.3577	9.66231	68.5483	146.805	56.9226	55.5442	79.9787	215.59	82.942
p__Proteobacteria	s__Porticoccus_sp.	15.1164	93.271	54.5926	30.4112	8.39683	70.8576	14.0195	87.0821	70.8085	15.8651	123.917	31.2614	22.2298	30.0147	101.546	111.295	67.2643	33.5941	3.6337	17.2629	71.9498	61.953	28.5724	1.29681	44.153	76.1095	44.405	31.4611	14.3902	38.1415	152.083	83.3272	32.6927	38.6733	92.9556	61.7062	166.033
p__Proteobacteria	s__Proteobacteria_bacterium_SW_6_67_9	7.31561	260.975	31.9035	6.08602	1.25861	399.612	7.48011	793.255	162.752	7.898	18.3858	45.6222	8.55259	10.2276	5.39402	183.25	102.243	8.19405	3.05865	2.03837	1126.99	10.426	7.8592	0.995776	95.9159	1067.17	13.3007	7.53246	3.75558	7.19462	25.7996	44.9098	20.799	15.4471	306.404	27.9833	20.2787
p__Proteobacteria	s__Rhodobacteraceae_bacterium_WD3A24	47.3231	193.739	133.588	123.3	18.6728	248.345	38.0346	149.199	130.005	46.0817	125.586	80.7584	82.8644	74.0392	180.534	270.256	118.218	76.8405	35.2306	21.2762	175.449	108.525	86.5579	17.5015	131.96	96.9003	93.882	57.1841	49.3035	37.795	122.38	212.64	99.7209	128.262	169.55	276.736	92.091
p__Proteobacteria	s__Rhodobacteraceae_bacterium_WFHF2C18	24.8592	154.095	84.542	68.4083	7.65256	167.877	12.4222	104.399	61.5916	12.99	77.6387	44.1589	51.7976	25.4063	75.7301	223.775	54.5003	51.4593	13.5008	12.1071	139.979	44.9801	53.6285	0.963637	94.2653	98.8038	34.9062	23.6071	26.5705	8.78861	73.1457	155.225	36.5866	74.388	121.763	187.344	80.4166
p__Proteobacteria	s__Rhodobacterales_bacterium_CG_4_10_14_0_8_um_filter_70_9	43.0918	220.754	113.413	119.468	28.3479	261.338	18.9583	94.6718	79.4278	34.2685	50.4141	64.917	103.451	63.9849	43.4116	266.535	112.077	82.9982	28.0787	19.1208	136.27	81.5544	84.9536	13.8738	166.401	83.679	55.3783	67.0909	44.4186	18.101	114.18	217.611	104.72	96.8501	150.224	290.967	99.3357
p__Proteobacteria	s__Rhodobacterales_bacterium_CG_4_9_14_3_um_filter_71_31	51.2833	371.317	202.9	180.998	35.4918	475.253	36.5891	182.856	149.954	32.6465	80.1126	113.955	136.668	94.0739	72.6539	444.919	161.375	136.221	28.8965	28.6948	209.685	108.535	132.999	25.6878	245.672	157.365	126.095	58.4993	64.3325	32.7322	167.924	344.454	125.795	129.978	260.968	414.589	176.02
p__Proteobacteria	s__Rhodobacterales_bacterium_CG18_big_fil_WC_8_21_14_2_50_71_9	74.2267	438.954	234.564	174.08	44.3098	581.345	23.5071	205.173	154.849	48.5179	57.1169	119.612	144.795	94.195	51.4725	550.634	191.771	119.043	36.8271	41.1601	284.518	130.107	125.559	22.3361	282.448	192.163	90.0296	65.6296	61.4315	25.9084	201.511	389.319	139.628	150.519	284.249	520.122	198.492
p__Proteobacteria	s__Rhodosalinus_sp._E84	35.8256	179.546	113.442	109.996	10.4568	224.079	20.9795	103.094	103.501	20.2785	173.122	77.3218	89.1536	51.9378	232.274	296.742	79.0842	62.5288	25.2962	12.3548	106.602	88.0134	78.0703	14.8342	123.504	86.6664	77.5921	31.044	48.6762	23.7228	120.191	237.88	85.4135	112.399	146.88	233.045	97.9745
p__Proteobacteria	s__Rhodothalassium_salexigens	47.5618	148.06	82.1087	49.1044	41.3874	161.51	24.2042	112.246	69.4708	56.1726	19.6646	65.4634	61.4471	46.1937	41.9378	83.0478	64.951	38.1944	24.4301	33.366	74.306	69.6742	51.9668	12.7971	78.9215	57.6475	48.4242	34.2793	25.5462	32.9723	62.7699	87.677	62.0992	56.6769	76.1828	113.259	69.959
p__Proteobacteria	s__Rhodovibrio_salinarum	241.561	1017.48	710.069	418.687	187.77	4695.9	134.236	871.707	8415.45	377.656	242.486	526.386	400.174	385.674	126.978	822.874	722.582	227.128	146.688	174.08	2880.08	679.887	416.314	106.894	940.776	2426.67	411.224	193.416	139.932	410.019	522.159	763.508	470.677	379.646	5584.45	588.117	609.047
p__Proteobacteria	s__Roseovarius_nitratireducens	12.6624	138.889	86.3062	49.6064	10.4239	106.076	13.8191	89.6452	56.5624	28.9974	67.8416	31.3732	39.6244	38.2878	88.6104	95.9095	99.9779	31.4651	5.36136	21.1161	111.11	64.0012	47.2096	5.25685	58.1976	47.2805	35.7944	16.3052	13.1486	22.428	72.2017	137.802	55.1063	52.8933	78.6522	147.261	100.355
p__Proteobacteria	s__Roseovarius_salinarum	19.4661	147.779	88.0862	76.7928	21.2285	188.818	22.4749	100.554	69.7171	32.0169	74.0021	38.3048	45.391	47.9961	114.392	200.729	58.2744	53.4924	13.9498	18.8362	115.923	67.2434	70.1133	13.8246	80.9152	93.785	42.8124	29.9715	18.4069	13.9994	71.5146	138.399	66.8538	59.1252	126.434	155.707	71.3042
p__Proteobacteria	s__Roseovarius_sp.	46.295	199.455	104.627	80.5905	36.2866	180.301	23.4139	93.7068	85.9078	31.4894	102.83	79.8595	82.437	53.8744	107.384	233.032	158.568	72.6224	28.7128	32.0716	136.857	89.9246	69.4944	15.5834	110.152	84.4017	59.3638	59.4804	51.0994	32.2987	120.751	213.771	78.0637	102.424	105.517	253.664	161.869
p__Proteobacteria	s__Roseovarius_sp._HI0049	21.7259	103.163	52.8344	54.2312	12.8679	139.247	16.5981	59.431	55.5323	16.8351	76.8632	39.3135	49.8924	28.3306	76.238	145.302	53.0311	28.2856	11.4054	9.95382	71.1796	42.0133	51.9251	8.97393	68.2569	38.7898	29.3917	17.639	17.8289	20.035	65.29	115.371	40.3774	64.412	77.2472	109.618	62.9773
p__Proteobacteria	s__Rubrimonas_cliftonensis	181.042	1105.95	647.398	509.747	126.431	1438.66	101.146	524.318	466.853	180.064	199.574	377.05	427.099	285.03	197.009	1350.93	453.664	364.128	135.684	122.149	656.294	402.549	394.982	73.373	704.756	485.409	324.89	228.253	189.402	118.677	516.691	1066.14	387.588	485.143	804.844	1337.97	526.975
p__Proteobacteria	s__Salinisphaera_halophila	41.7871	169.035	62.0093	33.7508	10.6443	447.67	7.07822	371.697	72.9205	38.3563	23.6208	48.4578	40.0413	32.7625	14.9799	128.6	135.346	31.7068	8.00608	11.3519	245.483	40.1535	41.239	24.6734	79.9711	207.306	19.1698	23.897	9.80909	23.6599	53.5769	70.7297	43.9603	36.5287	436.968	66.0663	50.936
p__Proteobacteria	s__Salinisphaera_hydrothermalis	34.6252	86.813	26.7374	36.8039	22.634	212.036	12.0432	182.203	30.5898	34.3492	18.4735	53.2133	61.3008	25.4697	5.66297	117.859	67.9942	17.1384	14.2799	18.7243	114.296	30.1361	37.8158	17.2681	47.9594	86.4161	44.9763	21.9126	16.5211	28.3399	36.7597	48.2474	47.3649	29.0664	200.984	42.2765	31.9781
p__Proteobacteria	s__Salinisphaera_orenii	36.0056	107.007	42.7126	44.4764	17.5025	372.555	5.36514	342.641	47.648	36.6461	17.9492	45.1837	36.4086	41.3621	7.62556	110.673	123.025	19.7873	3.83939	10.0677	197.008	36.0029	41.5044	20.5341	63.5152	164.034	40.9106	13.691	8.7914	23.2665	40.3125	37.8391	38.678	25.8064	324.294	45.7717	40.707
p__Proteobacteria	s__Salinisphaera_shabanensis	30.091	117.963	32.3537	29.467	10.5802	334.968	7.10344	321.991	61.6278	38.0374	15.2035	38.6905	35.0703	30.8391	14.2328	134.601	109.061	11.3502	12.8661	6.94439	181.438	30.0838	33.4025	40.7127	52.8929	154.518	27.9262	15.0314	9.78415	14.426	41.0769	42.6945	42.0222	19.1699	347.767	38.6828	41.5285
p__Proteobacteria	s__Salinisphaera_sp.	53.9889	234.903	61.2747	39.931	14.2124	797.454	22.8002	788.911	66.6588	97.6815	36.7035	55.0602	78.6246	59.8701	32.2452	348.633	270.686	31.1334	30.5268	12.4768	405.274	46.5257	69.1952	48.7457	115.285	330.866	57.5344	49.8707	15.2118	30.634	47.1123	77.9477	74.4973	37.6992	674.185	56.0756	77.5279
p__Proteobacteria	s__Salinisphaeraceae_bacterium	160.244	524.885	94.4892	96.4643	22.1588	1904.05	28.1945	1930.74	103.317	193.028	48.1888	111.835	135.605	157.24	32.789	728.166	619.374	37.619	32.2879	26.2679	847.007	81.9176	148.246	110.324	269.255	723.698	105.422	45.9499	34.101	50.3891	92.688	124.81	128.821	68.9241	1420.95	100.043	168.241
p__Proteobacteria	s__SAR324_cluster_bacterium	22.6901	62.5726	63.7296	51.397	24.7162	70.0825	25.166	91.8092	110.221	38.4412	81.2286	44.0497	41.3617	41.9181	63.3022	58.8748	48.1409	31.5204	16.6802	24.9518	231.666	65.4237	37.5053	20.0077	41.571	83.8873	22.4111	31.0177	23.2297	37.8148	26.6854	51.6085	35.8076	51.4633	36.3929	21.79	61.4653
p__Proteobacteria	s__Sedimenticola_selenatireducens	58.9575	247.288	243.581	86.3289	55.2092	293.369	64.8667	381.836	313.672	68.7213	455.42	123.422	97.5261	61.9183	613.141	331.468	244.17	51.5371	22.1312	37.3899	206.52	168.243	107.278	19.2241	145.243	106.044	94.4017	82.5262	34.3713	67.1601	146.754	231.585	105.927	104.863	346.159	188.479	327.486
p__Proteobacteria	s__Sedimenticola_sp.	81.2766	466.857	362.733	168.111	54.648	497.648	94.5379	498.887	421.987	135.644	959.092	199.765	134.173	130.757	1189.21	570.241	334.274	115.999	39.8351	50.1885	405.618	340.638	156.794	24.2051	329.829	191.967	119.615	125.396	76.5917	118.194	239.142	337.019	213.637	207.261	447.402	289.39	541.213
p__Proteobacteria	s__Sedimenticola_thiotaurini	90.9485	394.24	320.357	142.366	72.4962	484.395	86.4204	516.972	362.05	95.2974	716.371	156.938	117.411	112.851	878.356	381.305	321.676	90.667	45.665	48.5957	269.074	203.361	142.146	48.9319	243.804	156.925	103.722	100.344	78.8596	102.403	152.487	285.426	168.709	160.212	542.188	268.815	425.584
p__Proteobacteria	s__Spiribacter_salinus	28.5109	94.2256	63.7364	41.1162	20.7969	223.341	14.2808	186.726	88.8005	35.8809	19.0013	46.6594	53.1729	30.4344	30.1831	87.4033	53.9349	48.9978	14.7639	24.9757	160.019	47.5363	42.3651	12.1694	68.8593	161.128	46.1795	43.266	34.0103	19.2495	44.4744	54.1015	51.9037	44.0569	150.136	77.3189	66.9222
p__Proteobacteria	s__Spiribacter_sp._E85	139.303	596.641	356.168	175.448	103.354	2001.72	91.3581	979.895	677.274	134.339	72.3209	290.572	155.946	153.277	93.3499	540.338	337.71	135.408	66.8804	84.1142	799.38	265.168	138.001	39.4422	389.831	650.023	166.427	116.773	79.1149	149.608	252.02	362.305	201.9	225.521	1114.03	375.417	235.699
p__Proteobacteria	s__Sulfurifustis_variabilis	270.366	1478.96	745.537	519.128	331.383	881.3	612.431	876.726	768.562	372.817	247.947	668.761	429.119	487.014	532.939	698.54	1010.22	432.109	235.267	310.388	789.905	643.102	392.321	198.048	1093.44	420.802	397.229	423.599	369.858	562.338	515.078	715.805	441.21	705.486	909.164	515.23	633.616
p__Proteobacteria	s__Tamilnaduibacter_salinus	2.45504	38.6221	22.824	6.53263	1.55579	90.3066	2.04614	2316.95	39.9516	10.6146	52.0873	17.5605	8.77646	11.9134	22.8241	88.9368	52.513	8.53616	4.85064	12.0257	53.9574	8.4933	7.26788	0.459918	24.9437	2186.76	16.1691	15.8325	7.49624	8.7561	22.8142	40.2697	10.1039	15.6475	84.2009	32.4684	30.8212
p__Proteobacteria	s__Thioalbus_denitrificans	187.829	840.087	689.029	340.939	190.776	973.829	170.648	876.096	754.584	261.479	643.655	451.427	303.162	281.796	1422.26	846.112	696.214	260.12	133.952	139.352	653.715	654.194	300.07	88.4706	587.465	430.358	273.603	190.558	161.614	266.272	396.187	638.782	395	388.349	822.531	544.39	743.445
p__Proteobacteria	s__Thioalkalivibrio_denitrificans	49.6192	282.181	195.404	129.438	45.5337	385.711	77.7788	414.898	194.261	88.1543	163.162	140.257	125.566	112.599	253.527	269.511	231.562	75.3389	29.9853	47.8954	313.175	176.395	90.758	23.4101	168.37	210.671	82.6508	81.0991	44.0807	90.0986	129.177	167.513	121.59	101.436	375.577	167.764	320.198
p__Proteobacteria	s__Thioalkalivibrio_nitratireducens	35.2678	96.5337	98.2158	61.019	35.216	110.657	42.552	114.389	78.644	36.6806	68.4519	77.0484	50.4902	58.4146	128.321	118.736	76.9655	52.1351	15.0874	34.442	88.7474	93.178	52.522	13.0038	86.558	81.4969	36.5586	30.5983	18.4419	28.497	68.2419	81.6385	64.9462	74.0751	91.7869	93.5615	128.1
p__Proteobacteria	s__Thioalkalivibrio_paradoxus	13.1341	80.1703	75.0924	54.3601	15.7001	96.4161	40.533	90.5921	57.1116	32.3327	72.2973	66.4706	34.043	45.1149	129.626	85.5268	64.3584	39.4648	13.915	18.8349	99.6288	69.2378	35.784	13.1414	57.9241	63.4242	39.6158	33.1535	15.8316	23.9035	61.4187	61.5122	53.1632	50.31	88.5472	78.2408	120.849
p__Proteobacteria	s__Thioalkalivibrio_sulfidiphilus	57.2503	245.037	149.865	107.977	42.1784	330.649	74.495	340.763	204.366	83.7605	347.5	133.426	98.4612	73.1488	472.209	320.563	223.246	69.532	39.7699	42.2812	272.582	164.466	100.613	43.8882	160.428	171.543	86.1697	74.8623	58.0866	58.26	119.092	161.187	112.913	91.9194	348.647	143.643	533.914
p__Proteobacteria	s__Thioalkalivibrio_thiocyanodenitrificans	53.5346	218.94	138.303	67.19	41.1946	283.27	68.2185	295.301	189.196	67.6084	137.204	112.449	78.0331	62.8933	288.16	236.43	168.452	65.4992	34.12	22.8135	233.357	142.105	77.7523	26.1061	142.83	157.907	55.0908	57.4751	36.8901	48.84	112.83	136.516	88.5155	75.2436	294.548	124.034	285.645
p__Proteobacteria	s__Thioflavicoccus_mobilis	37.8024	133.316	153.877	86.9472	45.9053	171.162	30.1169	99.4752	138.138	54.4411	91.0336	86.7878	73.5762	73.1841	141.164	229.975	81.0192	50.7387	28.8328	36.2688	125.48	111.612	60.3237	22.6603	109.724	54.1819	50.1584	55.2389	41.9051	50.364	66.1937	105.98	89.6969	69.6792	153.226	66.2579	182.943
p__Proteobacteria	s__Thiohalorhabdus_denitrificans	36.8904	217.45	125.412	72.444	40.5639	318.894	29.1978	369.854	426.604	57.4583	119.121	119.716	65.323	52.8229	262.249	162.347	116.346	50.2791	30.0452	37.0141	408.715	83.1213	51.1971	21.5944	146.656	357.682	58.5498	39.2381	28.9908	116.035	92.5395	138.194	88.6406	79.8384	229.617	135.744	127.66
p__Proteobacteria	s__Thiohalospira_halophila	11.0327	100.472	57.851	35.1358	6.66347	174.781	11.1105	190.783	140.862	17.5051	70.1269	38.8201	21.9545	22.7262	219.729	92.6804	70.57	9.51904	3.08855	14.3955	157.306	40.2641	20.8473	11.7756	59.2647	122.109	16.7318	13.9282	8.37425	22.2452	36.0131	61.6826	28.6792	29.2439	175.8	55.0663	97.2068
p__Proteobacteria	s__unclassified_c__Gammaproteobacteria	17.8359	143.288	45.0316	30.6216	11.9305	282.387	21.0997	269.6	978.272	9.18045	251.455	77.0346	22.9107	22.4938	302.095	128.884	127.519	17.9157	16.053	12.6554	44.7549	23.9244	27.9225	4.89082	50.6065	122.43	147.174	20.055	5.21665	27.0035	86.7332	89.6172	34.6901	34.7401	35.7344	52.8802	132.57
p__Proteobacteria	s__unclassified_g__Halomonas	25.4713	100.079	90.1344	51.758	30.1002	495.237	25.1024	308.194	1251.87	28.6167	132.303	86.2082	48.1154	39.7877	91.585	213.793	167.986	38.5779	10.363	21.9374	149.053	70.244	67.6292	6.62415	89.6607	263.377	73.5797	23.8826	10.8408	45.9796	103.083	98.3755	69.9811	89.1036	248.898	115.079	216.354
p__Proteobacteria	s__unclassified_g__Thioalkalivibrio	30.6208	99.3571	74.7784	62.458	21.0182	159.33	19.5626	162.417	107.816	40.4459	60.1029	76.0323	51.3988	50.9208	74.5251	122.761	84.0999	47.0534	15.5199	24.3386	190.178	74.6165	49.6107	8.30478	71.336	120.719	50.054	47.4326	30.2775	61.3789	66.5747	79.8505	54.3533	59.7235	131.457	85.7052	121.542
p__Proteobacteria	s__unclassified_g__Wenzhouxiangella	13.8592	358.664	110.116	51.6655	11.2374	2437.46	20.4609	1768.53	261.012	26.0684	151.423	136.535	55.8933	36.5816	28.6035	267.451	224.703	28.403	11.0417	16.1348	399.215	69.0834	70.5457	12.1959	177.432	531.478	66.1179	52.237	21.2082	38.8017	149.879	198.969	79.7277	75.049	1365.84	389.209	269.952
p__Proteobacteria	s__uncultured_Thiohalocapsa_sp._PB-PSB1	28.3029	77.3471	87.1715	51.9695	28.8283	96.5511	23.4495	70.3155	62.7316	52.9264	141.946	52.1576	53.5445	33.3919	94.3097	108.664	47.8071	41.6379	19.9734	20.9076	86.2016	55.1796	45.8185	9.33366	58.3168	61.9138	20.3856	40.8671	64.6933	32.531	48.1857	78.8685	42.9513	62.1582	89.207	67.846	95.1114
p__Proteobacteria	s__Wenzhouxiangella_marina	45.8986	216.267	105.911	79.9435	13.16	265.959	20.6347	235.962	100.704	36.0553	63.853	115.941	74.0446	56.2653	28.9355	181.844	94.0078	27.0433	20.5003	16.5406	110.386	57.0478	69.6199	9.84895	122.783	111.432	73.2571	67.1737	26.8485	34.6673	90.3798	117.822	90.5222	72.835	559.942	151.259	143.232
p__Proteobacteria	s__Wenzhouxiangella_sediminis	33.3188	337.699	105.361	79.6344	13.9331	2264.79	26.3735	1036.23	198.874	47.0144	144.551	181.106	77.4487	45.9355	28.6307	238.805	243.197	54.8423	20.4887	11.2083	215.011	61.6113	70.5812	12.5387	201.48	290.974	86.1781	40.3344	31.7514	38.9185	183.317	181.44	95.0757	91.8335	1310.1	274.743	502.021
p__Proteobacteria	s__Wenzhouxiangella_sp.	41.1289	224.203	108.615	100.151	12.8427	297.575	40.0209	308.81	127.169	33.9774	46.9756	91.117	60.27	43.0109	18.1015	128.688	113.168	31.0975	10.4447	22.5513	173.834	61.626	56.7748	25.5835	115.893	152.752	59.6116	54.7088	21.9032	30.5202	102.635	120.546	90.8665	52.8624	644.112	127.508	171.541
p__Proteobacteria	s__Wenzhouxiangella_sp._C33	13.7522	150.986	70.9061	50.6112	2.79301	203.513	8.46482	214.594	125.425	17.503	78.6467	38.2158	30.5984	17.5972	73.9094	98.294	56.1328	14.9764	3.84234	11.5177	133.404	38.0177	36.3341	3.86248	66.7084	145.993	24.6557	30.7578	7.92605	11.5133	56.9079	84.1098	32.5216	40.0632	331.536	112.354	137.285
p__Proteobacteria	s__Wenzhouxiangella_sp._XN201	43.4213	524.733	219.695	123.564	41.2324	1226.11	57.1703	1163.71	304.562	71.3712	81.1469	233.582	120.24	62.153	31.5975	364.657	259.805	101.852	15.0931	36.0816	489.971	111.318	133.265	10.377	290.111	517.73	176.356	123.589	39.1109	68.8316	321.886	374.186	193.671	150.761	1204.49	613.386	357.207
p__Proteobacteria	s__Wenzhouxiangella_sp._XN79A	16.873	275.206	108.857	72.2508	16.176	327.564	10.1474	362.566	404.24	31.5717	73.9238	112.632	58.1646	36.5267	45.2635	175.511	99.8261	37.6777	7.6426	23.0145	108.836	91.0438	73.4945	11.3094	121.628	127.891	55.7949	63.8228	24.3456	39.3266	143.933	147.429	90.9064	75.4694	580.729	181.068	652.649
p__Rhodothermaeota	s__Rhodothermales_bacterium	391.764	1689.23	1947.26	1202.21	215.219	3186.42	710.176	1508.18	2494.94	940.741	1558.86	1456.98	1444.63	756.033	627.501	3638.07	1469.95	492.548	145.751	209.555	1325.71	5347.31	1938.69	95.3108	1891.46	2334.92	1229.37	486.826	255.308	504.565	1066.68	1206.28	2240.42	1797.04	1695.53	1004.77	1465.48
p__Rhodothermaeota	s__Rubricoccus_marinus	34.5108	115.657	122.397	98.0116	53.7541	159.929	74.6321	116.008	95.3166	71.1403	16.8829	132.209	78.7606	60.3998	11.0302	154.334	96.8585	66.4816	23.5368	28.3295	174.65	95.0626	104.502	24.3805	104.551	163.559	133.823	54.7601	35.8687	47.1974	86.8067	117.072	136.336	114.653	201.501	98.2958	116.765
p__Rhodothermaeota	s__Rubrivirga_marina	105.984	232.48	331.673	263.885	109.795	437.053	168.678	318.612	334.298	125.617	51.1769	369.565	248.666	136.67	25.1664	320.179	249.879	173.739	74.6941	65.7884	383.859	286.195	242.109	54.4281	240.32	354.521	309.48	137.636	72.842	99.5594	249.757	257.821	413.058	311.471	453.435	211.04	223.143
p__Rhodothermaeota	s__Salinivenus_iranica	7.01788	47.275	54.6644	27.3744	7.29785	123.073	10.8438	120.354	91.0127	17.7084	8.39482	35.8365	26.7005	21.0489	8.20606	38.7941	20.171	20.8705	7.68566	12.7549	219.309	52.9978	25.923	0.778322	41.4305	688.851	16.007	11.6546	10.6829	9.27063	31.9769	26.9354	44.0936	28.2352	120.12	33.1998	38.0755
p__Rhodothermaeota	s__Salinivenus_lutea	14.9416	56.9294	75.5474	44.4371	3.88379	176.926	15.1671	146.734	110.273	31.8908	10.1396	37.5021	29.7899	12.9305	3.85636	81.8864	34.0756	19.9884	4.15926	12.0048	305.336	87.6288	44.5604	0	54.2779	863.984	38.5211	27.6815	11.2334	11.9444	41.7303	38.0122	60.2513	55.3339	147.079	44.5161	46.7695
p__Spirochaetes	s__Spirochaetes_bacterium	97.1606	172.88	251.268	214.406	82.9031	198.334	169.272	221.271	351.488	112.785	386.895	160.461	143.836	109.668	366.961	228.766	156.534	92.9149	97.6467	126.815	506.897	208.383	129.728	96.4607	189.366	272.541	93.2426	133.929	143.947	101.615	172.094	175.177	152.4	189.305	323.784	161.008	311.143
p__unclassified_d__Bacteria	s__bacterium_BMS3Abin12	39.4195	127.996	91.5504	47.464	20.2093	159.813	27.09	169.988	113.566	33.9336	69.1229	58.5681	29.4673	25.3561	135.441	138.822	73.8005	14.4709	16.5348	21.6904	121.994	73.8516	39.3324	16.1309	79.6651	74.1393	31.9856	36.0598	12.0663	37.2227	63.3621	75.9938	46.3231	60.2763	115.683	53.4066	87.7231
p__unclassified_d__Bacteria	s__bacterium_BMS3Bbin10	160.623	691.722	915.233	347.476	81.6623	1925.3	109.658	709.55	593.135	187.534	144.535	408.487	399.878	372.315	118.367	606.476	413.315	303.794	152.034	75.0793	3217.53	511.255	420.034	260.204	1006.98	1166.5	209.341	124.376	105.388	273.439	231.129	608.562	608.337	518.286	466.681	849.072	377.2
p__unclassified_d__Bacteria	s__bacterium_HR33	508.803	1396.91	994.33	1114.52	552.558	1615.57	642.9	1604.53	967.997	816.324	152.806	1169.21	800.518	1096.81	119.2	763.567	783.248	518.653	479.547	455.347	1691.41	856.907	758.735	317.455	2110.09	2055.09	782.333	477.701	381.976	685.606	1115.08	738.071	906.686	857.949	885.349	491.383	740.396
p__unclassified_d__Bacteria	s__bacterium_JGI_053	144.561	163.872	174.633	199.708	264.042	417.589	143.529	279.201	193.867	187.812	15.1381	354.34	183.024	139.652	13.5865	162.67	151.985	213.092	159.225	206.208	416.737	138.422	139.786	193.674	406.765	407.075	228.635	98.5379	208.01	159.7	263.019	132.151	215.616	188.868	268.349	457.652	166.635
p__unclassified_d__Bacteria	s__candidate_division_KSB1_bacterium	864.689	1421.59	2453.78	1652.5	764.569	1506.07	1228.27	1237.68	2238.18	1341.82	1151.75	1554.16	1342.08	845.782	935.954	1803.71	1117.93	758.122	616.24	557.696	2637.45	1786.27	1387.74	465.353	1605.34	1688.87	944.391	1031.26	832.16	734.598	921.666	1316.83	1614.07	1299.49	1682.46	876.078	2117.1
p__Verrucomicrobia	s__Opitutales_bacterium	17.6669	76.0425	94.9583	33.814	8.93938	63.9676	21.1255	75.012	80.041	21.125	14.3635	45.7352	37.7778	21.4677	26.6503	143.101	32.0543	14.5445	6.26999	12.3862	151.204	51.7195	46.7315	6.58772	77.3314	83.145	27.4108	26.5915	15.9223	13.4711	43.1038	77.9767	68.84	43.8892	95.9237	66.1635	111.939
