# Supplementary material for: Eco-evolutionary strategies for relieving carbon limitation under salt stress differ across microbial clades
Source: Research Square preprint supplement (doi:10.21203/rs.3.rs-3322692/v1), 2023-09-21
Supplement: Supplementary file 2 [file 17dd0f16ebfca2968bdecbbc.xlsx]

## Sheet: Na+ extrusion 
#KO	Description	Hyperlink
K03313	Na+:H+ antiporter, NhaA family	http://www.genome.jp/dbget-bin/www_bget?ko:K03313
K03315	Na+:H+ antiporter, NhaC family	http://www.genome.jp/dbget-bin/www_bget?ko:K03315
K05565	multicomponent Na+:H+ antiporter subunit A	http://www.genome.jp/dbget-bin/www_bget?ko:K05565
K05566	multicomponent Na+:H+ antiporter subunit B	http://www.genome.jp/dbget-bin/www_bget?ko:K05566
K05567	multicomponent Na+:H+ antiporter subunit C	http://www.genome.jp/dbget-bin/www_bget?ko:K05567
K05568	multicomponent Na+:H+ antiporter subunit D	http://www.genome.jp/dbget-bin/www_bget?ko:K05568
K05569	multicomponent Na+:H+ antiporter subunit E	http://www.genome.jp/dbget-bin/www_bget?ko:K05569
K05570	multicomponent Na+:H+ antiporter subunit F	http://www.genome.jp/dbget-bin/www_bget?ko:K05570
K05571	multicomponent Na+:H+ antiporter subunit G	http://www.genome.jp/dbget-bin/www_bget?ko:K05571

## Sheet: K+ uptake
#KO	Description	Hyperlink
K03498	trk system potassium uptake protein	http://www.genome.jp/dbget-bin/www_bget?ko:K03498
K03499	trk system potassium uptake protein	http://www.genome.jp/dbget-bin/www_bget?ko:K03499
K10716	voltage-gated potassium channel	http://www.genome.jp/dbget-bin/www_bget?ko:K10716
K01546	potassium-transporting ATPase potassium-binding subunit	http://www.genome.jp/dbget-bin/www_bget?ko:K01546
K01547	potassium-transporting ATPase ATP-binding subunit [EC:7.2.2.6]	http://www.genome.jp/dbget-bin/www_bget?ko:K01547
K01548	potassium-transporting ATPase KdpC subunit	http://www.genome.jp/dbget-bin/www_bget?ko:K01548
K03549	KUP system potassium uptake protein	http://www.genome.jp/dbget-bin/www_bget?ko:K03549
K05559	multicomponent K+:H+ antiporter subunit A	http://www.genome.jp/dbget-bin/www_bget?ko:K05559
K05560	multicomponent K+:H+ antiporter subunit C	http://www.genome.jp/dbget-bin/www_bget?ko:K05560
K05561	multicomponent K+:H+ antiporter subunit D	http://www.genome.jp/dbget-bin/www_bget?ko:K05561
K05562	multicomponent K+:H+ antiporter subunit E	http://www.genome.jp/dbget-bin/www_bget?ko:K05562
K05563	multicomponent K+:H+ antiporter subunit F	http://www.genome.jp/dbget-bin/www_bget?ko:K05563
K05564	multicomponent K+:H+ antiporter subunit G	http://www.genome.jp/dbget-bin/www_bget?ko:K05564

## Sheet: osmotic solute
#KO	Description	Hyperlink
K06718	L-2,4-diaminobutyric acid acetyltransferase [EC:2.3.1.178]	http://www.genome.jp/dbget-bin/www_bget?ko:K06718
K06720	L-ectoine synthase [EC:4.2.1.108]	http://www.genome.jp/dbget-bin/www_bget?ko:K06720
K10674	ectoine hydroxylase [EC:1.14.11.55]	http://www.genome.jp/dbget-bin/www_bget?ko:K10674
K00697	trehalose 6-phosphate synthase [EC:2.4.1.15 2.4.1.347]	http://www.genome.jp/dbget-bin/www_bget?ko:K00697
K01087	trehalose 6-phosphate phosphatase [EC:3.1.3.12]	http://www.genome.jp/dbget-bin/www_bget?ko:K01087
K05343	maltose alpha-D-glucosyltransferase / alpha-amylase [EC:5.4.99.16 3.2.1.1]	http://www.genome.jp/dbget-bin/www_bget?ko:K05343
K00034	glucose 1-dehydrogenase [EC:1.1.1.47]	http://www.genome.jp/dbget-bin/www_bget?ko:K00034
K19813	glucose dehydrogenase [EC:1.1.5.9]	http://www.genome.jp/dbget-bin/www_bget?ko:K19813
K00147	glutamate-5-semialdehyde dehydrogenase [EC:1.2.1.41]	http://www.genome.jp/dbget-bin/www_bget?ko:K00147
K00286	pyrroline-5-carboxylate reductase [EC:1.5.1.2]	http://www.genome.jp/dbget-bin/www_bget?ko:K00286
K00931	glutamate 5-kinase [EC:2.7.2.11]	http://www.genome.jp/dbget-bin/www_bget?ko:K00931
K00130	betaine-aldehyde dehydrogenase [EC:1.2.1.8]	http://www.genome.jp/dbget-bin/www_bget?ko:K00130
