# Supplementary material for: Eco-evolutionary strategies for relieving carbon limitation under salt stress differ across microbial clades
Source: Research Square preprint supplement (doi:10.21203/rs.3.rs-3322692/v1), 2023-09-21
Supplement: Supplementary file 3 [file 9c26fc73cb967f40c4d8dc79.xlsx]

## Sheet: All Euryarchaeota taxa
Assembly Accession	Assembly Name	Assembly Level	Genome size (Mb)
GCA_000006805.1	ASM680v1	Complete Genome	2.57101
GCA_000007065.1	ASM706v1	Complete Genome	4.09635
GCA_000007185.1	ASM718v1	Complete Genome	1.69497
GCA_000007305.1	ASM730v1	Complete Genome	1.90826
GCA_000007345.1	ASM734v1	Complete Genome	5.75149
GCA_000008645.1	ASM864v1	Complete Genome	1.75138
GCA_000008665.1	ASM866v1	Complete Genome	2.1784
GCA_000009185.1	ASM918v1	Complete Genome	3.17936
GCA_000009965.1	ASM996v1	Complete Genome	2.08874
GCA_000011005.1	ASM1100v1	Complete Genome	2.95763
GCA_000011085.1	ASM1108v1	Complete Genome	4.27464
GCA_000011105.1	ASM1110v1	Complete Genome	1.7385
GCA_000011585.1	ASM1158v1	Complete Genome	1.66114
GCA_000012545.1	ASM1254v1	Complete Genome	1.7674
GCA_000013445.1	ASM1344v1	Complete Genome	3.54474
GCA_000013725.1	ASM1372v1	Complete Genome	2.57503
GCA_000014945.1	ASM1494v1	Complete Genome	1.87947
GCA_000015765.1	ASM1576v1	Complete Genome	1.80496
GCA_000015825.1	ASM1582v1	Complete Genome	2.4781
GCA_000016125.1	ASM1612v1	Complete Genome	1.78905
GCA_000016525.1	ASM1652v1	Complete Genome	1.85316
GCA_000017165.1	ASM1716v1	Complete Genome	1.72005
GCA_000017185.1	ASM1718v1	Complete Genome	1.5695
GCA_000017625.1	ASM1762v1	Complete Genome	2.54294
GCA_000018365.1	ASM1836v1	Complete Genome	1.84761
GCA_000021965.1	ASM2196v1	Complete Genome	2.92292
GCA_000022205.1	ASM2220v1	Complete Genome	3.69258
GCA_000022365.1	ASM2236v1	Complete Genome	2.04544
GCA_000022545.1	ASM2254v1	Complete Genome	1.8458
GCA_000023945.1	ASM2394v1	Complete Genome	3.1168
GCA_000023965.1	ASM2396v1	Complete Genome	3.33235
GCA_000023985.1	ASM2398v1	Complete Genome	1.50725
GCA_000024185.1	ASM2418v1	Complete Genome	2.9372
GCA_000024625.1	ASM2462v1	Complete Genome	1.76174
GCA_000025285.1	ASM2528v1	Complete Genome	1.56342
GCA_000025325.1	ASM2532v1	Complete Genome	5.44078
GCA_000025505.1	ASM2550v1	Complete Genome	2.19627
GCA_000025525.1	ASM2552v1	Complete Genome	1.77314
GCA_000025625.1	ASM2562v1	Complete Genome	4.44364
GCA_000025685.1	ASM2568v1	Complete Genome	4.0129
GCA_000025865.1	ASM2586v1	Complete Genome	2.01242
GCA_000026045.1	ASM2604v1	Complete Genome	2.7497
GCA_000063445.1	ASM6344v1	Complete Genome	3.17992
GCA_000069025.1	ASM6902v1	Complete Genome	2.66878
GCA_000091665.1	ASM9166v1	Complete Genome	1.73993
GCA_000092305.1	ASM9230v1	Complete Genome	1.32819
GCA_000145295.1	ASM14529v1	Complete Genome	1.63914
GCA_000147875.1	ASM14787v1	Complete Genome	2.84329
GCA_000151105.2	ASM15110v2	Complete Genome	2.06424
GCA_000151205.2	ASM15120v2	Complete Genome	2.08643
GCA_000151225.1	ASM15122v1	Scaffold	1.72927
GCA_000151245.1	ASM15124v1	Scaffold	1.71325
GCA_000166095.1	ASM16609v1	Complete Genome	1.24334
GCA_000172995.2	ASM17299v2	Complete Genome	3.94447
GCA_000179575.2	ASM17957v2	Complete Genome	1.67745
GCA_000187225.2	ASM18722v1	Contig	4.28481
GCA_000189795.2	ASM18979v2	Contig	1.78257
GCA_000189815.2	ASM18981v2	Contig	1.79737
GCA_000189835.2	ASM18983v2	Contig	1.792
GCA_000189855.2	ASM18985v2	Contig	1.7947
GCA_000189875.2	ASM18987v2	Contig	1.94748
GCA_000189895.2	ASM18989v2	Contig	1.71326
GCA_000189915.2	ASM18991v2	Contig	1.95217
GCA_000189935.2	ASM18993v2	Contig	2.00898
GCA_000189955.2	ASM18995v2	Contig	1.96506
GCA_000189975.2	ASM18997v2	Contig	1.97303
GCA_000189995.2	ASM18999v2	Contig	1.88938
GCA_000190015.2	ASM19001v2	Contig	1.88602
GCA_000190035.2	ASM19003v2	Contig	1.91005
GCA_000190055.2	ASM19005v2	Contig	1.99216
GCA_000190075.2	ASM19007v2	Contig	1.9725
GCA_000190095.2	ASM19009v2	Contig	1.97885
GCA_000190115.2	ASM19011v2	Contig	2.01168
GCA_000190135.2	ASM19013v2	Contig	1.975
GCA_000190155.2	ASM19015v2	Contig	1.86921
GCA_000190175.2	ASM19017v2	Contig	1.81824
GCA_000191585.1	ASM19158v1	Complete Genome	2.58375
GCA_000194625.1	ASM19462v1	Complete Genome	1.90194
GCA_000195935.2	ASM19593v2	Complete Genome	1.76856
GCA_000196655.1	ASM19665v1	Complete Genome	2.40623
GCA_000196895.1	ASM19689v1	Complete Genome	3.69865
GCA_000204415.1	ASM20441v1	Complete Genome	3.02664
GCA_000211475.1	ASM21147v1	Complete Genome	1.86132
GCA_000214415.1	ASM21441v1	Complete Genome	1.8542
GCA_000214725.1	ASM21472v1	Complete Genome	2.54654
GCA_000215915.3	HLRTI_V2	Contig	3.14656
GCA_000215995.1	ASM21599v1	Complete Genome	1.71682
GCA_000217715.1	ASM21771v1	Complete Genome	4.35527
GCA_000217995.1	ASM21799v1	Complete Genome	2.13844
GCA_000220645.1	ASM22064v1	Complete Genome	1.7467
GCA_000221185.1	ASM22118v1	Complete Genome	2.01132
GCA_000223905.1	ASM22390v1	Complete Genome	3.89
GCA_000224475.1	ASM22447v1	Complete Genome	3.64316
GCA_000226975.3	ASM22697v3	Complete Genome	4.38154
GCA_000230715.3	ASM23071v3	Complete Genome	3.78836
GCA_000230735.3	ASM23073v3	Complete Genome	4.3541
GCA_000230955.3	ASM23095v3	Complete Genome	3.16256
GCA_000235565.1	ASM23556v1	Complete Genome	2.57103
GCA_000236195.2	ASM23619v1	Contig	1.1986
GCA_000237865.1	ASM23786v1	Complete Genome	3.26048
GCA_000243255.1	ASM24325v1	Chromosome	3.20095
GCA_000243455.2	ASM24345v2	Contig	1.81878
GCA_000246985.3	ASM24698v3	Complete Genome	2.21517
GCA_000251105.1	ASM25110v1	Complete Genome	2.37844
GCA_000258515.1	TheZil1.0	Contig	1.76456
GCA_000259215.1	ASM25921v1	Contig	3.38368
GCA_000263735.1	ASM26373v1	Complete Genome	1.73689
GCA_000265525.1	ASM26552v1	Complete Genome	1.95031
GCA_000275605.1	ASM27560v1	Complete Genome	1.90983
GCA_000275865.1	ASM27586v1	Chromosome	2.4751
GCA_000281695.1	ASM28169v1	Complete Genome	3.79361
GCA_000283335.1	162.HSB1.1	Contig	4.49231
GCA_000296615.1	ASM29661v1	Scaffold	3.16801
GCA_000302455.1	ASM30245v1	Contig	2.68427
GCA_000304355.2	Mb_MS2	Complete Genome	2.78977
GCA_000306725.1	ASM30672v1	Complete Genome	3.07277
GCA_000306765.2	ASM30676v2	Complete Genome	3.90471
GCA_000309865.1	MMad_1.0	Contig	2.42015
GCA_000320505.2	ASM32050v2	Contig	2.0458
GCA_000327485.1	ASM32748v1	Complete Genome	2.82086
GCA_000328285.1	Haloferax sp. BAB2207 V.1	Contig	3.74471
GCA_000328525.1	ASM32852v1	Complete Genome	3.22388
GCA_000328665.1	ASM32866v1	Complete Genome	2.71401
GCA_000328685.1	ASM32868v1	Complete Genome	4.31412
GCA_000334895.1	ASM33489v1	Contig	3.47673
GCA_000336615.1	ASM33661v1	Contig	4.22542
GCA_000336635.1	ASM33663v1	Contig	4.28036
GCA_000336655.1	ASM33665v1	Contig	4.33858
GCA_000336675.1	ASM33667v1	Contig	3.41907
GCA_000336695.1	ASM33669v1	Contig	2.99156
GCA_000336715.1	ASM33671v1	Contig	4.05243
GCA_000336735.1	ASM33673v1	Contig	3.64926
GCA_000336755.1	ASM33675v1	Contig	3.95214
GCA_000336775.1	ASM33677v1	Contig	4.05732
GCA_000336795.1	ASM33679v1	Contig	3.61906
GCA_000336815.1	ASM33681v1	Contig	3.9988
GCA_000336835.1	ASM33683v1	Contig	3.59821
GCA_000336855.1	ASM33685v1	Contig	3.60953
GCA_000336875.1	ASM33687v1	Contig	3.68287
GCA_000336895.1	ASM33689v1	Contig	4.14711
GCA_000336915.1	ASM33691v1	Contig	3.4497
GCA_000336935.1	ASM33693v1	Contig	4.19978
GCA_000336955.1	ASM33695v1	Contig	3.69795
GCA_000336975.1	ASM33697v1	Contig	3.58703
GCA_000336995.1	ASM33699v1	Contig	3.10853
GCA_000337015.1	ASM33701v1	Contig	3.3826
GCA_000337035.1	ASM33703v1	Contig	3.64531
GCA_000337055.1	ASM33705v1	Contig	3.30737
GCA_000337075.1	ASM33707v1	Contig	3.03753
GCA_000337095.1	ASM33709v1	Contig	4.38452
GCA_000337115.1	ASM33711v1	Contig	3.89527
GCA_000337135.1	ASM33713v1	Contig	4.30927
GCA_000337155.1	ASM33715v1	Contig	3.77497
GCA_000337175.1	ASM33717v1	Contig	4.02369
GCA_000337195.1	ASM33719v1	Contig	4.1908
GCA_000337215.1	ASM33721v1	Contig	4.58863
GCA_000337235.1	ASM33723v1	Contig	4.92684
GCA_000337255.1	ASM33725v1	Contig	3.61412
GCA_000337275.1	ASM33727v1	Contig	4.40516
GCA_000337295.1	ASM33729v1	Contig	3.89454
GCA_000337315.1	ASM33731v1	Contig	3.86675
GCA_000337335.1	ASM33733v1	Contig	3.30613
GCA_000337355.1	ASM33735v1	Contig	3.61974
GCA_000337375.1	ASM33737v1	Contig	3.42504
GCA_000337395.1	ASM33739v1	Contig	3.13776
GCA_000337415.1	ASM33741v1	Contig	3.32886
GCA_000337435.1	ASM33743v1	Contig	3.37622
GCA_000337455.1	ASM33745v1	Contig	4.69489
GCA_000337475.1	ASM33747v1	Contig	3.52203
GCA_000337495.1	ASM33749v1	Contig	4.84161
GCA_000337515.1	ASM33751v1	Contig	3.23845
GCA_000337535.1	ASM33753v1	Contig	4.61836
GCA_000337555.1	ASM33755v1	Contig	4.40418
GCA_000337575.1	ASM33757v1	Contig	4.15961
GCA_000337595.1	ASM33759v1	Contig	4.63519
GCA_000337615.1	ASM33761v1	Contig	3.91581
GCA_000337635.1	ASM33763v1	Contig	4.26445
GCA_000337655.1	ASM33765v1	Contig	3.69403
GCA_000337675.1	ASM33767v1	Contig	4.41653
GCA_000337695.1	ASM33769v1	Contig	4.49618
GCA_000337715.1	ASM33771v1	Contig	4.11128
GCA_000337735.1	ASM33773v1	Contig	3.46029
GCA_000337755.1	ASM33775v1	Contig	4.40493
GCA_000337775.1	ASM33777v1	Contig	3.9232
GCA_000337795.1	ASM33779v1	Contig	3.82597
GCA_000337815.1	ASM33781v1	Contig	3.36898
GCA_000337835.1	ASM33783v1	Contig	3.81243
GCA_000337855.1	ASM33785v1	Contig	3.92851
GCA_000337875.1	ASM33787v1	Contig	4.4163
GCA_000337895.1	ASM33789v1	Contig	3.68875
GCA_000337915.1	ASM33791v1	Contig	3.4237
GCA_000341715.1	ASM34171v1	Complete Genome	3.42795
GCA_000363885.1	MethanoVillo1.0	Contig	1.20736
GCA_000371805.1	ASM37180v1	Contig	1.24938
GCA_000375985.1	ASM37598v1	Contig	0.75864
GCA_000376025.1	ASM37602v1	Contig	0.965738
GCA_000376445.1	ASM37644v1	Contig	4.31754
GCA_000376965.1	ASM37696v1	Contig	1.68693
GCA_000379085.1	ASM37908v1	Scaffold	3.60777
GCA_000383975.1	ASM38397v1	Scaffold	4.93484
GCA_000385565.1	ASM38556v1	Complete Genome	2.07693
GCA_000400975.1	ASM40097v1	Contig	2.43176
GCA_000402775.1	ASM40277v1	Contig	1.32568
GCA_000403645.1	ASM40364v1	Complete Genome	3.25526
GCA_000404165.1	ASM40416v1	Complete Genome	1.99819
GCA_000415945.1	HX64_HX5_0315125.1	Scaffold	2.04094
GCA_000415965.1	J07B_scf56329a_trim	Scaffold	3.4755
GCA_000415985.1	HQW2_08err_032412a	Scaffold	3.59454
GCA_000416005.1	HQX_031812	Scaffold	3.01991
GCA_000416025.1	HN6_031912	Scaffold	2.529
GCA_000416045.1	HR_032012	Scaffold	2.1208
GCA_000416065.1	HN4_v3_031612	Scaffold	2.88866
GCA_000416085.1	J07ABselected	Scaffold	2.98294
GCA_000416105.1	J07AB_HB67select	Scaffold	2.64955
GCA_000421805.1	ASM42180v1	Contig	3.59148
GCA_000427685.1	ASM42768v1	Scaffold	3.79793
GCA_000430485.1	ASM43048v1	Scaffold	2.17657
GCA_000430905.1	ASM43090v1	Scaffold	1.70678
GCA_000437055.1	MGS186	Scaffold	1.72997
GCA_000437835.1	MGS1088	Scaffold	1.633
GCA_000447865.2	ASM44786v2	Scaffold	2.8809
GCA_000455345.1	Halgo	Scaffold	3.90636
GCA_000455365.1	HdjelfamassiliensisIIH2	Scaffold	3.77655
GCA_000470655.1	HATI1	Complete Genome	3.14616
GCA_000474235.1	ASM47423v1	Contig	2.62897
GCA_000484895.1	ASM48489v1	Contig	0.622569
GCA_000484915.1	ASM48491v1	Contig	0.512945
GCA_000484935.1	ASM48493v1	Contig	0.928936
GCA_000484955.1	ASM48495v1	Contig	0.394893
GCA_000485535.1	ASM48553v1	Scaffold	3.6375
GCA_000493245.1	Nat_J71	Contig	3.66762
GCA_000495475.1	Htyrrel1.0	Contig	3.67509
GCA_000499765.1	Methanobacterium	Complete Genome	2.02977
GCA_000504205.1	ASM50420v1	Contig	3.15188
GCA_000504565.2	ASM50456v2	Complete Genome	3.9015
GCA_000513315.1	ANOR1	Scaffold	2.22192
GCA_000513435.1	HRSP_AJ67	Scaffold	4.22501
GCA_000517445.1	ASM51744v1	Complete Genome	1.95774
GCA_000517625.1	ASM51762v1	Complete Genome	4.13118
GCA_000529525.1	Methanobrevibacter oralis JMR01	Scaffold	2.10783
GCA_000585495.1	ASM58549v1	Complete Genome	1.97636
GCA_000591055.1	ASM59105v1	Complete Genome	2.91257
GCA_000621965.1	ASM62196v1	Scaffold	2.04181
GCA_000685155.1	ANME2D V10	Scaffold	3.20339
GCA_000685635.1	ASM68563v1	Chromosome	3.9067
GCA_000690595.2	ASM69059v2	Scaffold	3.79434
GCA_000691505.2	ASM69150v2	Contig	3.17849
GCA_000691865.1	MethMaris1.0	Contig	2.54244
GCA_000700025.2	ASM70002v2	Contig	3.28237
GCA_000710605.1	HTGA29.1	Contig	4.13162
GCA_000710615.1	HAPD43.1	Contig	3.92672
GCA_000711215.1	ASM71121v1	Contig	1.71179
GCA_000711905.1	ASM71190v1	Scaffold	1.51358
GCA_000723845.1	PRJEB5511_assembly_1	Scaffold	3.89363
GCA_000725425.1	ASM72542v1	Complete Genome	1.85937
GCA_000730175.1	ASM73017v1	Contig	4.2237
GCA_000731985.1	ASM73198v1	Contig	3.77413
GCA_000734035.1	ASM73403v1	Complete Genome	2.31629
GCA_000739065.1	ASM73906v1	Complete Genome	1.60756
GCA_000739555.1	ASM73955v1	Contig	2.955
GCA_000739575.1	ASM73957v1	Contig	3.85222
GCA_000739595.1	ASM73959v1	Contig	3.67798
GCA_000740075.1	ASM74007v1	Contig	1.02854
GCA_000744315.1	ASM74431v1	Contig	4.0645
GCA_000744455.1	ASM74445v1	Contig	2.49072
GCA_000745485.1	ASM74548v1	Scaffold	3.36956
GCA_000746075.1	ASM74607v1	Scaffold	3.39392
GCA_000746205.1	ASM74620v1	Scaffold	2.76746
GCA_000755225.1	ASM75522v1	Contig	3.45149
GCA_000755245.1	ASM75524v1	Contig	3.76437
GCA_000762265.1	ASM76226v1	Complete Genome	2.44999
GCA_000765475.1	Mmet_Version1	Contig	2.50851
GCA_000769655.1	ASM76965v1	Complete Genome	2.12616
GCA_000784335.1	ASM78433v1	Scaffold	4.3509
GCA_000784355.1	Metpay	Scaffold	2.7917
GCA_000789255.1	ASM78925v1	Complete Genome	1.86082
GCA_000815265.1	ASM81526v1	Contig	3.7183
GCA_000815385.1	ASM81538v1	Contig	4.0915
GCA_000816105.1	ASM81610v1	Complete Genome	1.92091
GCA_000824705.1	Methanobrevibacter smithii	Contig	1.71838
GCA_000827835.1	ASM82783v1	Complete Genome	4.22505
GCA_000828535.1	ASM82853v1	Complete Genome	1.85841
GCA_000828555.1	ASM82855v1	Complete Genome	1.74975
GCA_000828575.1	ASM82857v1	Complete Genome	1.73102
GCA_000953115.1	DSM1535	Complete Genome	2.47807
GCA_000966265.1	ASM96626v1	Contig	2.20643
GCA_000969885.1	ASM96988v1	Complete Genome	3.12738
GCA_000969905.1	ASM96990v1	Complete Genome	4.56388
GCA_000969925.1	ASM96992v1	Complete Genome	3.13023
GCA_000969945.1	ASM96994v1	Complete Genome	4.55349
GCA_000969965.1	ASM96996v1	Complete Genome	4.13734
GCA_000969985.1	ASM96998v1	Complete Genome	4.90719
GCA_000970005.1	ASM97000v1	Complete Genome	3.91409
GCA_000970025.1	ASM97002v1	Complete Genome	4.57491
GCA_000970045.1	ASM97004v1	Complete Genome	4.21147
GCA_000970065.1	ASM97006v1	Complete Genome	4.48757
GCA_000970085.1	ASM97008v1	Complete Genome	5.01756
GCA_000970125.1	ASM97012v1	Complete Genome	4.94111
GCA_000970145.1	ASM97014v1	Complete Genome	5.42789
GCA_000970165.1	ASM97016v1	Complete Genome	4.09648
GCA_000970185.1	ASM97018v1	Complete Genome	4.06655
GCA_000970205.1	ASM97020v1	Complete Genome	4.14282
GCA_000970225.1	ASM97022v1	Complete Genome	4.15434
GCA_000970245.1	ASM97024v1	Complete Genome	4.16624
GCA_000970265.1	ASM97026v1	Complete Genome	4.13981
GCA_000970285.1	ASM97028v1	Complete Genome	5.01861
GCA_000970305.1	ASM97030v1	Complete Genome	4.56045
GCA_000970325.1	ASM97032v1	Complete Genome	2.39464
GCA_000978935.1	gtlEnvA5udCFS	Scaffold	4.0682
GCA_000978945.1	gtlEnvA5udCFS	Scaffold	4.07397
GCA_000978955.1	gtlEnvA5udCFS	Scaffold	4.06196
GCA_000978965.1	gtlEnvA5udCFS	Scaffold	4.16485
GCA_000979015.1	gtlEnvA5udCFS	Scaffold	3.982
GCA_000979025.1	gtlEnvA5udCFS	Scaffold	4.01438
GCA_000979035.1	gtlEnvA5udCFS	Scaffold	4.12969
GCA_000979045.1	gtlEnvA5udCFS	Scaffold	4.12282
GCA_000979095.1	gtlEnvA5udCFS	Scaffold	4.00362
GCA_000979105.1	gtlEnvA5udCFS	Scaffold	4.04946
GCA_000979115.1	gtlEnvA5udCFS	Scaffold	3.9718
GCA_000979125.1	gtlEnvA5udCFS	Scaffold	4.07265
GCA_000979175.1	gtlEnvA5udCFS	Scaffold	4.08497
GCA_000979185.1	gtlEnvA5udCFS	Scaffold	3.98922
GCA_000979195.1	gtlEnvA5udCFS	Scaffold	4.0917
GCA_000979205.1	gtlEnvA5udCFS	Scaffold	4.2341
GCA_000979255.1	gtlEnvA5udCFS	Scaffold	4.08122
GCA_000979265.1	gtlEnvA5udCFS	Scaffold	4.18856
GCA_000979275.1	gtlEnvA5udCFS	Scaffold	4.0826
GCA_000979295.1	gtlEnvA5udCFS	Scaffold	3.84214
GCA_000979335.1	gtlEnvA5udCFS	Scaffold	4.07794
GCA_000979345.1	gtlEnvA5udCFS	Scaffold	4.1989
GCA_000979375.1	gtlEnvA5udCFS	Scaffold	4.0923
GCA_000979385.1	gtlEnvA5udCFS	Scaffold	3.90715
GCA_000979415.1	gtlEnvA5udCFS	Scaffold	4.08005
GCA_000979425.1	gtlEnvA5udCFS	Scaffold	4.08361
GCA_000979455.1	gtlEnvA5udCFS	Scaffold	4.07463
GCA_000979475.1	gtlEnvA5udCFS	Scaffold	4.0699
GCA_000979495.1	gtlEnvA5udCFS	Scaffold	4.10248
GCA_000979505.1	gtlEnvA5udCFS	Scaffold	4.07842
GCA_000979515.1	gtlEnvA5udCFS	Scaffold	4.07611
GCA_000979555.1	gtlEnvA5udCFS	Scaffold	4.07893
GCA_000979575.1	gtlEnvA5udCFS	Scaffold	4.04321
GCA_000979585.1	gtlEnvA5udCFS	Scaffold	4.02887
GCA_000979595.1	gtlEnvA5udCFS	Scaffold	4.15797
GCA_000979635.1	gtlEnvA5udCFS	Scaffold	4.16051
GCA_000979655.1	gtlEnvA5udCFS	Scaffold	4.01107
GCA_000979665.1	gtlEnvA5udCFS	Scaffold	4.11022
GCA_000979675.1	gtlEnvA5udCFS	Scaffold	4.09568
GCA_000979685.1	gtlEnvA5udCFS	Scaffold	4.12399
GCA_000979735.1	gtlEnvA5udCFS	Scaffold	4.09415
GCA_000979745.1	gtlEnvA5udCFS	Scaffold	4.00594
GCA_000979755.1	gtlEnvA5udCFS	Scaffold	4.1215
GCA_000979765.1	gtlEnvA5udCFS	Scaffold	4.12604
GCA_000979815.1	gtlEnvA5udCFS	Scaffold	4.07528
GCA_000979825.1	gtlEnvA5udCFS	Scaffold	4.09127
GCA_000979845.1	gtlEnvA5udCFS	Scaffold	4.03416
GCA_000979855.1	gtlEnvA5udCFS	Scaffold	4.05356
GCA_000979895.1	gtlEnvA5udCFS	Scaffold	3.96825
GCA_000979915.1	gtlEnvA5udCFS	Scaffold	4.0449
GCA_000979925.1	gtlEnvA5udCFS	Scaffold	4.07965
GCA_000979935.1	gtlEnvA5udCFS	Scaffold	3.99833
GCA_000979975.1	gtlEnvA5udCFS	Scaffold	3.87073
GCA_000979995.1	gtlEnvA5udCFS	Scaffold	4.00686
GCA_000980005.1	gtlEnvA5udCFS	Scaffold	4.07752
GCA_000980025.1	gtlEnvA5udCFS	Scaffold	4.06409
GCA_000980055.1	gtlEnvA5udCFS	Scaffold	4.08538
GCA_000980075.1	gtlEnvA5udCFS	Scaffold	3.9788
GCA_000980085.1	gtlEnvA5udCFS	Scaffold	4.08166
GCA_000980105.1	gtlEnvA5udCFS	Scaffold	4.0792
GCA_000980135.1	gtlEnvA5udCFS	Scaffold	4.07757
GCA_000980155.1	gtlEnvA5udCFS	Scaffold	3.97212
GCA_000980175.1	gtlEnvA5udCFS	Scaffold	4.08598
GCA_001006045.1	ASM100604v1	Complete Genome	1.77009
GCA_001011115.1	ASM101111v1	Complete Genome	2.20974
GCA_001017125.1	ASM101712v1	Scaffold	2.48972
GCA_001027005.1	ASM102700v1	Complete Genome	4.50117
GCA_001190965.1	ASM119096v1	Complete Genome	3.91845
GCA_001261915.1	Halorubrum SD626R	Scaffold	3.24871
GCA_001280425.1	ASM128042v1	Contig	3.97099
GCA_001280455.1	ASM128045v1	Contig	3.56702
GCA_001282785.1	halo7	Contig	2.83586
GCA_001304615.2	ASM130461v2	Complete Genome	3.28369
GCA_001305655.1	ASM130565v1	Complete Genome	2.2535
GCA_001307315.1	Halpeg_cdk2_1	Contig	2.97254
GCA_001315845.1	ASM131584v1	Contig	1.89015
GCA_001315865.1	ASM131586v1	Contig	4.22385
GCA_001315885.1	ASM131588v1	Contig	2.27983
GCA_001315905.1	ASM131590v1	Contig	1.90945
GCA_001315945.1	ASM131594v1	Contig	2.68664
GCA_001315965.1	ASM131596v1	Contig	2.62754
GCA_001316165.1	ASM131616v1	Contig	2.11342
GCA_001316185.1	ASM131618v1	Contig	3.89306
GCA_001316205.1	ASM131620v1	Contig	4.92684
GCA_001316305.1	ASM131630v1	Contig	4.45896
GCA_001316325.1	ASM131632v1	Contig	2.45173
GCA_001316345.1	ASM131634v1	Contig	2.33148
GCA_001317315.1	ASM131731v1	Contig	3.73847
GCA_001317345.1	ASM131734v1	Contig	1.81916
GCA_001368915.1	PRJEB5949_assembly_1	Scaffold	4.01518
GCA_001402855.1	ASM140285v1	Chromosome	3.12241
GCA_001412335.1	ASM141233v1	Contig	2.16581
GCA_001412355.1	ASM141235v1	Contig	2.08572
GCA_001412415.1	ASM141241v1	Contig	2.29859
GCA_001418715.1	ASM141871v1	Contig	2.05248
GCA_001433455.1	ASM143345v1	Complete Genome	2.38853
GCA_001458655.1	Mb9	Complete Genome	2.49451
GCA_001462205.1	HalopeDYS1.0	Scaffold	3.24305
GCA_001469865.1	ASM146986v1	Contig	3.83076
GCA_001469875.2	ASM146987v2	Scaffold	3.90498
GCA_001469955.1	ASM146995v1	Contig	3.92956
GCA_001477655.1	ASM147765v1	Complete Genome	2.54354
GCA_001482285.1	ASM148228v1	Scaffold	3.97756
GCA_001483125.1	ASM148312v1	Contig	2.9509
GCA_001484195.1	ASM148419v1	Contig	2.33714
GCA_001484685.1	ASM148468v1	Complete Genome	1.96122
GCA_001485535.1	ASM148553v1	Contig	3.01281
GCA_001485555.1	ASM148555v1	Contig	4.18459
GCA_001485575.1	ASM148557v1	Contig	4.35926
GCA_001488575.1	Halobacterium hubeiense JI20-1	Complete Genome	3.13035
GCA_001507935.1	ASM150793v1	Contig	1.69512
GCA_001507955.1	ASM150795v1	Contig	1.35651
GCA_001507975.1	ASM150797v1	Contig	1.29365
GCA_001508065.1	ASM150806v1	Contig	1.89036
GCA_001508175.1	ASM150817v1	Contig	1.4815
GCA_001508185.1	ASM150818v1	Contig	1.34075
GCA_001508455.1	ASM150845v1	Contig	1.97379
GCA_001508615.1	ASM150861v1	Contig	2.25909
GCA_001508665.1	ASM150866v1	Scaffold	1.82596
GCA_001508695.1	ASM150869v1	Scaffold	2.62923
GCA_001508745.1	ASM150874v1	Contig	2.03757
GCA_001508815.1	ASM150881v1	Contig	2.01782
GCA_001509005.1	ASM150900v1	Contig	2.17329
GCA_001509255.1	ASM150925v1	Contig	1.59282
GCA_001509375.1	ASM150937v1	Scaffold	2.38296
GCA_001512365.1	ASM151236v1	Scaffold	2.76833
GCA_001512375.1	ASM151237v1	Scaffold	2.15317
GCA_001512385.1	ASM151238v1	Scaffold	2.04817
GCA_001512965.1	ASM151296v1	Scaffold	1.76231
GCA_001515185.1	DG-33	Scaffold	0.786381
GCA_001515195.1	DG-33-1	Scaffold	0.928769
GCA_001515205.2	ASM151520v2	Contig	1.23113
GCA_001515215.1	metagenomics assembly	Contig	1.2062
GCA_001542905.1	ASM154290v1	Contig	3.32577
GCA_001548675.1	ASM154867v1	Complete Genome	2.2733
GCA_001548885.1	SCGC-AAA259A05	Contig	1.16163
GCA_001548915.1	SCGC-AAA259D14	Contig	0.850372
GCA_001548935.1	SCGC-AAA259E17	Contig	0.883132
GCA_001548955.1	SCGC-AAA259E22	Contig	0.825701
GCA_001548965.1	SCGC-AAA259I07	Contig	0.637942
GCA_001548995.1	SCGC-AAA259I09	Contig	1.34426
GCA_001549015.1	SCGC-AAA259I14	Contig	0.766874
GCA_001549035.1	SCGC-AAA259B11	Contig	0.822059
GCA_001549045.1	SCGC-AAA259J03	Contig	0.893784
GCA_001549075.1	SCGC-AAA259D18	Contig	0.382865
GCA_001549095.1	SCGC-AAA259E19	Contig	1.41254
GCA_001549115.1	SCGC-AAA259M10	Contig	0.865782
GCA_001549125.1	SCGC-AAA261C02	Contig	0.628209
GCA_001549135.1	SCGC-AAA259O05	Contig	1.05757
GCA_001549175.1	SCGC-AAA261D19	Contig	0.673667
GCA_001549195.1	SCGC-AAA261F17	Contig	0.523733
GCA_001549215.1	SCGC-AAA261F19	Contig	0.655981
GCA_001549225.1	SCGC-AAA261O19	Contig	0.729384
GCA_001549255.1	SCGC-AAA382A03	Contig	0.428287
GCA_001549275.1	SCGC-AAA382A20	Contig	0.925397
GCA_001549285.1	SCGC-AAA382F02	Contig	0.336176
GCA_001549315.1	SCGC-AAA382K21	Contig	0.25829
GCA_001549325.1	SCGC-AAA382N08	Contig	0.422936
GCA_001549355.1	SCGC-AAA385M11	Contig	0.215229
GCA_001549365.1	SCGC-AAA833K04	Contig	0.16284
GCA_001549395.1	SCGC-AAA833F18	Contig	0.269915
GCA_001549415.1	SCGC-AAA261G05	Contig	0.532132
GCA_001549435.1	SCGC-AAA382A13	Contig	0.408808
GCA_001549445.1	SCGC-AAA382C18	Contig	0.546193
GCA_001549475.1	SCGC-AAA382M17	Contig	0.37804
GCA_001549495.1	SCGC-AAA385D11	Contig	0.306358
GCA_001549515.1	SCGC-AAA385M02	Contig	0.137797
GCA_001563245.1	ASM156324v1	Complete Genome	2.20119
GCA_001563305.1	ASM156330v1	Chromosome	1.5935
GCA_001563795.1	ASM156379v1	Contig	2.36824
GCA_001563805.1	ASM156380v1	Contig	2.87498
GCA_001563875.1	ASM156387v1	Contig	0.709831
GCA_001563885.1	ASM156388v1	Contig	2.00621
GCA_001563905.1	ASM156390v1	Contig	0.662884
GCA_001563915.1	ASM156391v1	Contig	0.815638
GCA_001563955.1	ASM156395v1	Contig	1.46345
GCA_001563965.1	ASM156396v1	Contig	1.27824
GCA_001563995.1	ASM156399v1	Contig	0.652532
GCA_001564005.1	ASM156400v1	Contig	1.48085
GCA_001564035.1	ASM156403v1	Contig	0.581882
GCA_001564085.1	ASM156408v1	Contig	1.27239
GCA_001564115.1	ASM156411v1	Contig	2.2878
GCA_001564135.1	ASM156413v1	Contig	2.09588
GCA_001564145.1	ASM156414v1	Contig	0.526182
GCA_001564175.1	ASM156417v1	Contig	1.44316
GCA_001564195.1	ASM156419v1	Contig	0.758571
GCA_001564205.1	ASM156420v1	Contig	1.48085
GCA_001564255.1	ASM156425v1	Contig	2.1558
GCA_001564275.1	ASM156427v1	Contig	3.16482
GCA_001564285.1	ASM156428v1	Contig	2.33023
GCA_001571385.1	ASM157138v1	Contig	2.71391
GCA_001571405.1	ASM157140v1	Contig	2.22323
GCA_001577555.1	ASM157755v1	Contig	1.95242
GCA_001577565.1	ASM157756v1	Contig	2.65404
GCA_001577775.1	ASM157777v1	Complete Genome	1.97713
GCA_001587575.1	ASM158757v1	Contig	1.55773
GCA_001587595.1	ASM158759v1	Scaffold	1.49543
GCA_001587605.1	ASM158760v1	Scaffold	1.49713
GCA_001587635.1	ASM158763v1	Scaffold	1.4823
GCA_001587655.1	ASM158765v1	Contig	1.61075
GCA_001587675.1	ASM158767v1	Contig	1.79446
GCA_001587695.1	ASM158769v1	Contig	1.65805
GCA_001587715.1	ASM158771v1	Contig	1.99421
GCA_001592435.1	ASM159243v1	Complete Genome	1.89611
GCA_001593955.1	ASM159395v1	Contig	3.98041
GCA_001595785.1	ASM159578v1	Contig	1.48083
GCA_001595795.1	ASM159579v1	Contig	3.55955
GCA_001595815.1	ASM159581v1	Contig	4.77206
GCA_001595885.1	ASM159588v1	Scaffold	1.24723
GCA_001602375.1	ASM160237v1	Contig	2.44611
GCA_001602645.1	ASM160264v1	Scaffold	2.6088
GCA_001602685.1	ASM160268v1	Scaffold	1.84465
GCA_001602695.1	ASM160269v1	Scaffold	1.61691
GCA_001603195.1	ASM160319v1	Scaffold	2.47589
GCA_001603205.1	ASM160320v1	Scaffold	1.99988
GCA_001603225.1	ASM160322v1	Scaffold	1.92773
GCA_001603255.1	ASM160325v1	Scaffold	1.91314
GCA_001625445.1	ASM162544v1	Contig	4.89669
GCA_001639265.1	ASM163926v1	Contig	2.60614
GCA_001639275.1	ASM163927v1	Contig	2.14043
GCA_001639285.1	ASM163928v1	Contig	2.6087
GCA_001639295.1	ASM163929v1	Contig	2.41461
GCA_001647085.1	ASM164708v1	Complete Genome	1.9288
GCA_001647155.1	ASM164715v1	Scaffold	4.3318
GCA_001683555.1	ASM168355v1	Contig	1.89417
GCA_001714685.2	ASM171468v2	Contig	4.29135
GCA_001723155.1	ASM172315v1	Contig	5.19257
GCA_001726015.1	ASM172601v1	Contig	1.88578
GCA_001729285.1	ASM172928v1	Contig	3.32952
GCA_001729375.1	ASM172937v1	Contig	4.2759
GCA_001729385.1	ASM172938v1	Contig	1.80987
GCA_001729395.1	ASM172939v1	Contig	1.55648
GCA_001729455.1	ASM172945v1	Contig	1.71224
GCA_001729965.1	ASM172996v1	Contig	1.72915
GCA_001761425.1	ASM176142v1	Complete Genome	1.11857
GCA_001766815.1	ASM176681v1	Scaffold	1.66608
GCA_001766825.1	ASM176682v1	Scaffold	1.45696
GCA_001767315.1	ASM176731v1	Complete Genome	1.97228
GCA_001800665.1	ASM180066v1	Scaffold	1.56252
GCA_001800675.1	ASM180067v1	Scaffold	1.52081
GCA_001800715.1	ASM180071v1	Scaffold	1.16481
GCA_001800735.1	ASM180073v1	Scaffold	1.49491
GCA_001800745.1	ASM180074v1	Scaffold	1.54672
GCA_001800755.1	ASM180075v1	Scaffold	1.76262
GCA_001800795.1	ASM180079v1	Scaffold	1.58882
GCA_001800815.1	ASM180081v1	Scaffold	1.86877
GCA_001800825.1	ASM180082v1	Scaffold	2.21069
GCA_001861355.1	ASM186135v1	Contig	4.58084
GCA_001886955.1	ASM188695v1	Complete Genome	2.08595
GCA_001888095.1	ASM188809v1	Scaffold	1.99045
GCA_001889405.1	ASM188940v1	Complete Genome	2.02296
GCA_001896715.1	ASM189671v1	Contig	2.68778
GCA_001896725.1	ASM189672v1	Contig	2.18176
GCA_001914405.1	ASM191440v1	Contig	2.14131
GCA_001919915.1	ASM191991v1	Scaffold	0.988769
GCA_001920565.1	ASM192056v1	Contig	0.258312
GCA_001940805.1	ASM194080v1	Scaffold	1.96533
GCA_001950595.1	ASM195059v1	Contig	2.57436
GCA_001953745.1	ASM195374v1	Contig	3.98062
GCA_001971705.1	ASM197170v1	Complete Genome	3.8358
GCA_001989615.1	ASM198961v1	Complete Genome	3.77899
GCA_002009965.1	ASM200996v1	Contig	1.47625
GCA_002009975.1	ASM200997v1	Contig	2.36235
GCA_002010035.1	ASM201003v1	Contig	0.207909
GCA_002010045.1	ASM201004v1	Contig	2.06253
GCA_002010075.1	ASM201007v1	Contig	1.28868
GCA_002010115.1	ASM201011v1	Contig	0.644825
GCA_002010125.1	ASM201012v1	Contig	1.62914
GCA_002010155.1	ASM201015v1	Contig	2.35134
GCA_002010165.1	ASM201016v1	Contig	1.10041
GCA_002010195.1	ASM201019v1	Contig	1.96656
GCA_002010205.1	ASM201020v1	Contig	0.478535
GCA_002010215.1	ASM201021v1	Contig	1.9724
GCA_002010225.1	ASM201022v1	Contig	0.581015
GCA_002010275.1	ASM201027v1	Contig	0.530115
GCA_002010285.1	ASM201028v1	Contig	1.75248
GCA_002010295.1	ASM201029v1	Contig	2.27922
GCA_002010305.1	ASM201030v1	Contig	2.14862
GCA_002011155.2	ASM201115v2	Contig	1.46535
GCA_002011165.2	ASM201116v2	Contig	1.49834
GCA_002011195.1	ASM201119v1	Contig	0.885114
GCA_002011215.1	ASM201121v1	Contig	2.70174
GCA_002011235.1	ASM201123v1	Contig	2.36004
GCA_002011245.1	ASM201124v1	Contig	0.752164
GCA_002011255.1	ASM201125v1	Contig	0.737977
GCA_002011295.1	ASM201129v1	Contig	1.08806
GCA_002011315.1	ASM201131v1	Contig	1.70339
GCA_002011335.1	ASM201133v1	Contig	1.02549
GCA_002025255.2	ASM202525v2	Complete Genome	3.46533
GCA_002067035.1	ASM206703v1	Contig	2.90457
GCA_002067065.1	ASM206706v1	Contig	2.48988
GCA_002067095.1	ASM206709v1	Contig	2.23979
GCA_002067115.1	ASM206711v1	Contig	2.18589
GCA_002067155.1	ASM206715v1	Contig	1.96086
GCA_002067265.1	ASM206726v1	Contig	1.92212
GCA_002067275.1	ASM206727v1	Contig	2.09824
GCA_002067315.1	ASM206731v1	Contig	3.24377
GCA_002067325.1	ASM206732v1	Contig	2.17254
GCA_002067335.1	ASM206733v1	Contig	1.50797
GCA_002067365.1	ASM206736v1	Contig	2.77668
GCA_002067485.1	ASM206748v1	Contig	1.90951
GCA_002067495.1	ASM206749v1	Contig	2.30665
GCA_002067565.1	ASM206756v1	Contig	1.80121
GCA_002067645.1	ASM206764v1	Contig	2.8514
GCA_002067665.1	ASM206766v1	Contig	2.08984
GCA_002067685.1	ASM206768v1	Contig	2.21245
GCA_002067705.1	ASM206770v1	Contig	3.43709
GCA_002067725.1	ASM206772v1	Contig	1.51075
GCA_002067755.1	ASM206775v1	Contig	2.22564
GCA_002067795.1	ASM206779v1	Contig	2.45484
GCA_002067895.1	ASM206789v1	Contig	2.31269
GCA_002067905.1	ASM206790v1	Contig	1.8537
GCA_002067935.1	ASM206793v1	Contig	1.93039
GCA_002067955.1	ASM206795v1	Contig	2.05385
GCA_002068435.1	ASM206843v1	Contig	2.24884
GCA_002069575.1	ASM206957v1	Contig	3.48988
GCA_002070175.1	ASM207017v1	Contig	1.57154
GCA_002070315.1	ASM207031v1	Contig	1.61623
GCA_002071305.1	ASM207130v1	Contig	1.52517
GCA_002071395.1	ASM207139v1	Contig	1.56012
GCA_002072215.1	ASM207221v1	Contig	2.44503
GCA_002114285.1	ASM211428v1	Contig	3.60355
GCA_002135005.1	ASM213500v1	Scaffold	3.30813
GCA_002135045.1	ASM213504v1	Scaffold	3.14599
GCA_002153915.1	ASM215391v1	Contig	1.51314
GCA_002156705.1	ASM215670v1	Complete Genome	3.93055
GCA_002168355.1	ASM216835v1	Contig	0.773563
GCA_002168385.1	ASM216838v1	Contig	0.997332
GCA_002168725.1	ASM216872v1	Contig	1.2514
GCA_002168805.2	ASM216880v2	Contig	1.75495
GCA_002169405.1	ASM216940v1	Contig	2.1644
GCA_002169555.1	ASM216955v1	Contig	0.994889
GCA_002170075.2	ASM217007v2	Contig	2.03363
GCA_002170315.2	ASM217031v2	Contig	1.80726
GCA_002170365.2	ASM217036v2	Contig	1.72433
GCA_002170775.2	ASM217077v2	Contig	1.44372
GCA_002170935.1	ASM217093v1	Contig	1.28561
GCA_002171315.2	ASM217131v2	Contig	1.47594
GCA_002171445.1	ASM217144v1	Contig	1.63265
GCA_002172185.1	ASM217218v1	Contig	0.826841
GCA_002172355.2	ASM217235v2	Contig	1.50169
GCA_002172375.1	ASM217237v1	Contig	1.40237
GCA_002172575.1	ASM217257v1	Contig	2.00194
GCA_002177135.1	ASM217713v1	Contig	3.9143
GCA_002197185.1	ASM219718v1	Complete Genome	1.85491
GCA_002201895.1	ASM220189v1	Chromosome	1.42162
GCA_002201915.1	ASM220191v1	Chromosome	1.43031
GCA_002208625.1	ASM220862v1	Contig	1.92067
GCA_002214365.1	ASM221436v1	Complete Genome	1.86682
GCA_002214385.1	ASM221438v1	Complete Genome	1.67412
GCA_002214465.1	ASM221446v1	Complete Genome	1.92242
GCA_002214485.1	ASM221448v1	Complete Genome	1.78567
GCA_002214505.1	ASM221450v1	Complete Genome	2.02917
GCA_002214525.1	ASM221452v1	Complete Genome	1.52282
GCA_002214545.1	ASM221454v1	Complete Genome	2.06593
GCA_002214565.1	ASM221456v1	Complete Genome	1.86899
GCA_002214585.1	ASM221458v1	Complete Genome	2.04314
GCA_002214605.1	ASM221460v1	Complete Genome	1.96198
GCA_002215285.1	ASM221528v1	Scaffold	3.27855
GCA_002215305.1	ASM221530v1	Contig	3.63375
GCA_002243045.1	ASM224304v1	Contig	3.16472
GCA_002252585.1	ASM225258v1	Contig	1.92634
GCA_002252725.1	ASM225272v1	Scaffold	3.70247
GCA_002252735.1	ASM225273v1	Scaffold	4.64804
GCA_002252745.1	ASM225274v1	Contig	2.97057
GCA_002252755.1	ASM225275v1	Scaffold	3.81132
GCA_002252805.1	ASM225280v1	Scaffold	3.35296
GCA_002252815.1	ASM225281v1	Contig	3.34623
GCA_002252835.1	ASM225283v1	Scaffold	3.54572
GCA_002252865.1	ASM225286v1	Contig	2.1124
GCA_002252875.1	ASM225287v1	Scaffold	3.27496
GCA_002252895.1	ASM225289v1	Scaffold	3.6267
GCA_002252925.1	ASM225292v1	Scaffold	3.74217
GCA_002252935.1	ASM225293v1	Scaffold	2.25364
GCA_002252955.1	ASM225295v1	Scaffold	4.2044
GCA_002252965.1	ASM225296v1	Scaffold	3.92673
GCA_002252985.1	ASM225298v1	Scaffold	3.32012
GCA_002254785.1	ASM225478v1	Scaffold	1.01808
GCA_002254825.2	ASM225482v2	Scaffold	1.06978
GCA_002254865.1	ASM225486v1	Contig	3.40804
GCA_002255125.1	ASM225512v1	Contig	0.603189
GCA_002255135.1	ASM225513v1	Scaffold	1.07592
GCA_002255165.1	ASM225516v1	Contig	0.890663
GCA_002256575.1	ASM225657v1	Scaffold	1.7516
GCA_002256595.1	ASM225659v1	Scaffold	1.47131
GCA_002256605.1	ASM225660v1	Contig	0.711459
GCA_002256645.1	ASM225664v1	Contig	0.208261
GCA_002256665.1	ASM225666v1	Contig	1.17114
GCA_002256715.1	ASM225671v1	Contig	1.1703
GCA_002286985.1	ASM228698v1	Contig	3.50665
GCA_002287175.1	ASM228717v1	Contig	3.46637
GCA_002287195.1	ASM228719v1	Contig	1.9282
GCA_002287215.1	ASM228721v1	Contig	1.70913
GCA_002287235.1	ASM228723v1	Contig	5.0886
GCA_002317815.1	ASM231781v1	Contig	0.800413
GCA_002355635.1	ASM235563v1	Complete Genome	3.10594
GCA_002355655.1	ASM235565v1	Complete Genome	3.0802
GCA_002356395.1	ASM235639v1	Complete Genome	1.71998
GCA_002379115.1	ASM237911v1	Contig	3.66542
GCA_002487355.1	ASM248735v1	Contig	3.73558
GCA_002494345.1	ASM249434v1	Contig	4.47632
GCA_002494495.1	ASM249449v1	Scaffold	1.86183
GCA_002494545.1	ASM249454v1	Scaffold	3.33827
GCA_002494625.1	ASM249462v1	Scaffold	2.09083
GCA_002494665.1	ASM249466v1	Scaffold	2.22733
GCA_002494725.1	ASM249472v1	Contig	1.8496
GCA_002494745.1	ASM249474v1	Scaffold	1.33465
GCA_002494765.1	ASM249476v1	Scaffold	1.61565
GCA_002494785.1	ASM249478v1	Scaffold	2.18303
GCA_002494795.1	ASM249479v1	Scaffold	1.46527
GCA_002494845.1	ASM249484v1	Scaffold	3.0465
GCA_002494885.1	ASM249488v1	Scaffold	2.26677
GCA_002495055.1	ASM249505v1	Scaffold	2.74833
GCA_002495065.1	ASM249506v1	Scaffold	2.42422
GCA_002495225.1	ASM249522v1	Scaffold	1.93041
GCA_002495235.1	ASM249523v1	Scaffold	1.04391
GCA_002495365.1	ASM249536v1	Scaffold	2.08695
GCA_002495445.1	ASM249544v1	Scaffold	1.81289
GCA_002495565.1	ASM249556v1	Scaffold	3.10878
GCA_002495625.1	ASM249562v1	Scaffold	2.45019
GCA_002495685.1	ASM249568v1	Scaffold	1.68112
GCA_002495725.1	ASM249572v1	Scaffold	3.69609
GCA_002495775.1	ASM249577v1	Scaffold	2.01258
GCA_002495805.1	ASM249580v1	Scaffold	1.84795
GCA_002495885.1	ASM249588v1	Scaffold	1.6484
GCA_002496065.1	ASM249606v1	Scaffold	1.30094
GCA_002496085.1	ASM249608v1	Scaffold	2.4129
GCA_002496095.1	ASM249609v1	Scaffold	3.31818
GCA_002496135.1	ASM249613v1	Scaffold	2.66775
GCA_002496165.1	ASM249616v1	Scaffold	2.31798
GCA_002496255.1	ASM249625v1	Scaffold	2.26595
GCA_002496295.1	ASM249629v1	Scaffold	1.70597
GCA_002496325.1	ASM249632v1	Scaffold	3.08605
GCA_002496355.1	ASM249635v1	Scaffold	1.65644
GCA_002496395.1	ASM249639v1	Scaffold	2.0742
GCA_002496465.1	ASM249646v1	Scaffold	2.57212
GCA_002496495.1	ASM249649v1	Scaffold	3.0244
GCA_002496545.1	ASM249654v1	Scaffold	1.87704
GCA_002496555.1	ASM249655v1	Scaffold	2.13562
GCA_002496565.1	ASM249656v1	Scaffold	3.64019
GCA_002496675.1	ASM249667v1	Scaffold	1.14123
GCA_002496755.1	ASM249675v1	Scaffold	2.52986
GCA_002496805.1	ASM249680v1	Scaffold	2.00075
GCA_002496825.1	ASM249682v1	Scaffold	1.12355
GCA_002496855.1	ASM249685v1	Scaffold	2.2856
GCA_002497045.1	ASM249704v1	Scaffold	2.43413
GCA_002497105.1	ASM249710v1	Scaffold	1.82002
GCA_002497365.1	ASM249736v1	Scaffold	1.8319
GCA_002497395.1	ASM249739v1	Scaffold	2.14039
GCA_002497445.1	ASM249744v1	Scaffold	1.97514
GCA_002497485.1	ASM249748v1	Scaffold	1.7516
GCA_002497555.1	ASM249755v1	Scaffold	2.41802
GCA_002497655.1	ASM249765v1	Scaffold	1.83657
GCA_002497705.1	ASM249770v1	Scaffold	1.74816
GCA_002497725.1	ASM249772v1	Scaffold	1.39863
GCA_002497785.1	ASM249778v1	Scaffold	1.80823
GCA_002497865.1	ASM249786v1	Scaffold	1.67278
GCA_002497945.1	ASM249794v1	Scaffold	2.05585
GCA_002497965.1	ASM249796v1	Scaffold	1.55511
GCA_002498025.1	ASM249802v1	Scaffold	2.55713
GCA_002498055.1	ASM249805v1	Scaffold	1.78855
GCA_002498065.1	ASM249806v1	Scaffold	2.4087
GCA_002498225.1	ASM249822v1	Scaffold	2.13959
GCA_002498295.1	ASM249829v1	Scaffold	2.29083
GCA_002498315.1	ASM249831v1	Scaffold	2.3423
GCA_002498375.1	ASM249837v1	Scaffold	1.5618
GCA_002498385.1	ASM249838v1	Scaffold	2.11511
GCA_002498445.1	ASM249844v1	Scaffold	2.35773
GCA_002498485.1	ASM249848v1	Scaffold	2.1242
GCA_002498505.1	ASM249850v1	Scaffold	2.24086
GCA_002498705.1	ASM249870v1	Scaffold	1.60406
GCA_002498745.1	ASM249874v1	Scaffold	2.00052
GCA_002498825.1	ASM249882v1	Scaffold	2.50729
GCA_002498905.1	ASM249890v1	Scaffold	1.69616
GCA_002499025.1	ASM249902v1	Scaffold	2.15696
GCA_002499035.1	ASM249903v1	Scaffold	2.12551
GCA_002499145.1	ASM249914v1	Scaffold	1.80028
GCA_002499165.1	ASM249916v1	Scaffold	2.44262
GCA_002499445.1	ASM249944v1	Scaffold	3.10048
GCA_002499455.1	ASM249945v1	Scaffold	2.30897
GCA_002499755.1	ASM249975v1	Scaffold	2.82792
GCA_002499825.1	ASM249982v1	Scaffold	2.66686
GCA_002499905.1	ASM249990v1	Scaffold	1.95487
GCA_002501645.1	ASM250164v1	Scaffold	2.53027
GCA_002501655.1	ASM250165v1	Scaffold	2.66992
GCA_002501695.1	ASM250169v1	Scaffold	2.30653
GCA_002501765.1	ASM250176v1	Scaffold	1.80847
GCA_002501965.1	ASM250196v1	Scaffold	1.42991
GCA_002502245.1	ASM250224v1	Scaffold	2.24744
GCA_002502405.1	ASM250240v1	Scaffold	2.32835
GCA_002502445.1	ASM250244v1	Scaffold	2.05206
GCA_002502475.1	ASM250247v1	Scaffold	1.99156
GCA_002502635.1	ASM250263v1	Scaffold	2.13231
GCA_002502685.1	ASM250268v1	Scaffold	1.03042
GCA_002502735.1	ASM250273v1	Scaffold	2.38397
GCA_002502785.1	ASM250278v1	Contig	2.51233
GCA_002502805.1	ASM250280v1	Scaffold	2.79451
GCA_002502815.1	ASM250281v1	Scaffold	1.2033
GCA_002502845.1	ASM250284v1	Scaffold	1.81099
GCA_002502855.1	ASM250285v1	Scaffold	2.11892
GCA_002502935.1	ASM250293v1	Scaffold	2.34804
GCA_002502975.1	ASM250297v1	Scaffold	2.43108
GCA_002503005.1	ASM250300v1	Scaffold	2.03259
GCA_002503085.1	ASM250308v1	Scaffold	2.50853
GCA_002503105.1	ASM250310v1	Scaffold	1.61764
GCA_002503125.1	ASM250312v1	Scaffold	2.14077
GCA_002503135.1	ASM250313v1	Scaffold	1.28977
GCA_002503185.1	ASM250318v1	Scaffold	1.821
GCA_002503345.1	ASM250334v1	Scaffold	1.43968
GCA_002503365.1	ASM250336v1	Scaffold	2.06308
GCA_002503445.1	ASM250344v1	Scaffold	1.87975
GCA_002503455.1	ASM250345v1	Scaffold	2.97399
GCA_002503525.1	ASM250352v1	Scaffold	2.37433
GCA_002503565.1	ASM250356v1	Scaffold	2.10382
GCA_002503585.1	ASM250358v1	Scaffold	2.136
GCA_002503595.1	ASM250359v1	Scaffold	2.39047
GCA_002503805.1	ASM250380v1	Scaffold	1.83869
GCA_002503825.1	ASM250382v1	Scaffold	2.83869
GCA_002503835.1	ASM250383v1	Scaffold	1.86483
GCA_002503845.1	ASM250384v1	Scaffold	1.1301
GCA_002503885.1	ASM250388v1	Scaffold	2.58204
GCA_002504485.1	ASM250448v1	Scaffold	2.14281
GCA_002504505.1	ASM250450v1	Scaffold	2.34014
GCA_002504585.1	ASM250458v1	Scaffold	1.85344
GCA_002504605.1	ASM250460v1	Scaffold	2.94606
GCA_002504725.1	ASM250472v1	Scaffold	2.00773
GCA_002504765.1	ASM250476v1	Scaffold	2.12445
GCA_002504965.1	ASM250496v1	Scaffold	1.8554
GCA_002505025.1	ASM250502v1	Scaffold	2.48159
GCA_002505485.1	ASM250548v1	Scaffold	3.81606
GCA_002505535.1	ASM250553v1	Scaffold	2.05618
GCA_002505605.1	ASM250560v1	Scaffold	2.15634
GCA_002505725.1	ASM250572v1	Scaffold	2.07759
GCA_002505765.1	ASM250576v1	Scaffold	2.2738
GCA_002505805.1	ASM250580v1	Scaffold	2.17111
GCA_002505825.1	ASM250582v1	Scaffold	1.6423
GCA_002505885.1	ASM250588v1	Scaffold	1.81359
GCA_002505895.1	ASM250589v1	Scaffold	2.15977
GCA_002505925.1	ASM250592v1	Scaffold	2.06439
GCA_002506015.1	ASM250601v1	Scaffold	2.36835
GCA_002506085.1	ASM250608v1	Scaffold	1.81088
GCA_002506095.1	ASM250609v1	Scaffold	2.57832
GCA_002506105.1	ASM250610v1	Scaffold	2.2347
GCA_002506145.1	ASM250614v1	Scaffold	2.16783
GCA_002506335.1	ASM250633v1	Scaffold	2.41223
GCA_002506415.1	ASM250641v1	Scaffold	3.83968
GCA_002506455.1	ASM250645v1	Scaffold	3.03258
GCA_002506535.1	ASM250653v1	Scaffold	2.34238
GCA_002506585.1	ASM250658v1	Scaffold	2.72109
GCA_002506745.1	ASM250674v1	Scaffold	1.68161
GCA_002506785.1	ASM250678v1	Scaffold	2.47933
GCA_002506795.1	ASM250679v1	Scaffold	1.98613
GCA_002506845.1	ASM250684v1	Scaffold	3.1109
GCA_002506915.1	ASM250691v1	Scaffold	2.98934
GCA_002507025.1	ASM250702v1	Scaffold	2.13727
GCA_002507035.1	ASM250703v1	Scaffold	2.18268
GCA_002507065.1	ASM250706v1	Scaffold	3.6807
GCA_002507095.1	ASM250709v1	Scaffold	2.12811
GCA_002507205.1	ASM250720v1	Scaffold	2.32658
GCA_002507265.1	ASM250726v1	Scaffold	2.09432
GCA_002507275.1	ASM250727v1	Scaffold	1.52134
GCA_002507315.1	ASM250731v1	Contig	2.17605
GCA_002507545.1	ASM250754v1	Scaffold	2.27465
GCA_002508385.1	ASM250838v1	Scaffold	2.04732
GCA_002508425.1	ASM250842v1	Scaffold	2.46599
GCA_002508465.1	ASM250846v1	Scaffold	4.26097
GCA_002508475.1	ASM250847v1	Scaffold	3.08802
GCA_002508495.1	ASM250849v1	Scaffold	1.93465
GCA_002508505.1	ASM250850v1	Scaffold	3.06006
GCA_002508635.1	ASM250863v1	Scaffold	1.97116
GCA_002508665.1	ASM250866v1	Scaffold	2.68848
GCA_002508675.1	ASM250867v1	Scaffold	2.59213
GCA_002508705.1	ASM250870v1	Scaffold	2.80178
GCA_002508725.1	ASM250872v1	Scaffold	2.61705
GCA_002508745.1	ASM250874v1	Scaffold	2.65145
GCA_002508765.1	ASM250876v1	Scaffold	2.67827
GCA_002508775.1	ASM250877v1	Scaffold	2.64005
GCA_002508805.1	ASM250880v1	Scaffold	2.59534
GCA_002508825.1	ASM250882v1	Scaffold	1.63852
GCA_002508845.1	ASM250884v1	Scaffold	1.70356
GCA_002508855.1	ASM250885v1	Scaffold	1.55492
GCA_002508885.1	ASM250888v1	Scaffold	1.6909
GCA_002508905.1	ASM250890v1	Scaffold	1.58689
GCA_002508925.1	ASM250892v1	Scaffold	1.49746
GCA_002508935.1	ASM250893v1	Scaffold	1.54824
GCA_002508965.1	ASM250896v1	Scaffold	2.08976
GCA_002508985.1	ASM250898v1	Scaffold	1.75225
GCA_002509005.1	ASM250900v1	Scaffold	2.11108
GCA_002509015.1	ASM250901v1	Scaffold	2.30132
GCA_002509045.1	ASM250904v1	Scaffold	1.82624
GCA_002509065.1	ASM250906v1	Scaffold	1.64057
GCA_002509085.1	ASM250908v1	Scaffold	1.63013
GCA_002509095.1	ASM250909v1	Scaffold	1.15752
GCA_002509125.1	ASM250912v1	Scaffold	1.52261
GCA_002509175.1	ASM250917v1	Scaffold	2.01378
GCA_002509325.1	ASM250932v1	Scaffold	2.92067
GCA_002509335.1	ASM250933v1	Scaffold	3.04429
GCA_002509345.1	ASM250934v1	Scaffold	2.25355
GCA_002509385.1	ASM250938v1	Scaffold	1.80394
GCA_002509485.1	ASM250948v1	Scaffold	1.66054
GCA_002509495.1	ASM250949v1	Scaffold	2.19777
GCA_002509505.1	ASM250950v1	Scaffold	2.44878
GCA_002509545.1	ASM250954v1	Scaffold	2.57017
GCA_002509565.1	ASM250956v1	Scaffold	2.65217
GCA_002509575.1	ASM250957v1	Scaffold	2.7442
GCA_002509605.1	ASM250960v1	Scaffold	1.46745
GCA_002509625.1	ASM250962v1	Scaffold	1.45718
GCA_002509645.1	ASM250964v1	Scaffold	1.53756
GCA_002509655.1	ASM250965v1	Scaffold	1.65754
GCA_002509665.1	ASM250966v1	Scaffold	2.93811
GCA_002509705.1	ASM250970v1	Scaffold	1.48954
GCA_002509725.1	ASM250972v1	Scaffold	1.42649
GCA_002509745.1	ASM250974v1	Scaffold	2.25459
GCA_002572525.1	ASM257252v1	Contig	5.05806
GCA_002634415.1	ASM263441v1	Contig	3.59264
GCA_002683155.1	ASM268315v1	Contig	0.876065
GCA_002685215.1	ASM268521v1	Contig	1.24783
GCA_002685315.1	ASM268531v1	Contig	1.09512
GCA_002685415.1	ASM268541v1	Contig	1.61746
GCA_002685635.1	ASM268563v1	Contig	1.12007
GCA_002685735.1	ASM268573v1	Contig	1.31358
GCA_002685895.1	ASM268589v1	Contig	1.63035
GCA_002686035.1	ASM268603v1	Contig	1.07516
GCA_002686525.1	ASM268652v1	Contig	1.35805
GCA_002686775.1	ASM268677v1	Contig	1.06688
GCA_002687075.1	ASM268707v1	Contig	2.20171
GCA_002687305.1	ASM268730v1	Contig	1.16607
GCA_002687355.1	ASM268735v1	Contig	0.918203
GCA_002687935.1	ASM268793v1	Contig	0.666542
GCA_002688825.1	ASM268882v1	Contig	1.80669
GCA_002688905.1	ASM268890v1	Contig	1.20437
GCA_002689085.1	ASM268908v1	Contig	1.64309
GCA_002689165.1	ASM268916v1	Contig	1.93765
GCA_002689345.1	ASM268934v1	Contig	1.67908
GCA_002689565.1	ASM268956v1	Contig	1.61871
GCA_002689805.1	ASM268980v1	Contig	1.44177
GCA_002690785.1	ASM269078v1	Contig	1.8075
GCA_002690815.1	ASM269081v1	Contig	1.40091
GCA_002690835.1	ASM269083v1	Contig	1.22581
GCA_002692145.1	ASM269214v1	Contig	1.17381
GCA_002692365.2	ASM269236v2	Contig	1.84471
GCA_002692465.1	ASM269246v1	Contig	1.50453
GCA_002692555.1	ASM269255v1	Contig	1.32494
GCA_002692625.1	ASM269262v1	Contig	1.6106
GCA_002692695.1	ASM269269v1	Contig	1.29755
GCA_002692765.1	ASM269276v1	Contig	1.12204
GCA_002692775.1	ASM269277v1	Contig	1.72245
GCA_002693225.1	ASM269322v1	Contig	1.22691
GCA_002693485.1	ASM269348v1	Contig	0.814077
GCA_002693705.1	ASM269370v1	Contig	1.32025
GCA_002693905.2	ASM269390v2	Contig	1.19569
GCA_002693925.2	ASM269392v2	Contig	1.18088
GCA_002694235.1	ASM269423v1	Contig	1.0618
GCA_002694245.1	ASM269424v1	Contig	1.98447
GCA_002694255.1	ASM269425v1	Contig	1.09884
GCA_002694525.1	ASM269452v1	Contig	1.60259
GCA_002694585.1	ASM269458v1	Contig	1.71427
GCA_002695105.1	ASM269510v1	Contig	1.62926
GCA_002695145.1	ASM269514v1	Contig	1.83035
GCA_002695525.1	ASM269552v1	Contig	1.2605
GCA_002696315.1	ASM269631v1	Contig	1.71367
GCA_002696505.1	ASM269650v1	Contig	1.93131
GCA_002696565.1	ASM269656v1	Contig	0.995066
GCA_002696615.1	ASM269661v1	Contig	1.29286
GCA_002696845.1	ASM269684v1	Contig	1.84174
GCA_002697065.1	ASM269706v1	Contig	0.935834
GCA_002697105.1	ASM269710v1	Contig	1.36237
GCA_002697175.1	ASM269717v1	Contig	1.08114
GCA_002697305.1	ASM269730v1	Contig	1.12893
GCA_002697685.1	ASM269768v1	Contig	1.05273
GCA_002697705.1	ASM269770v1	Contig	1.59808
GCA_002697845.1	ASM269784v1	Contig	1.63215
GCA_002698105.1	ASM269810v1	Contig	1.23629
GCA_002698145.1	ASM269814v1	Contig	2.08941
GCA_002698225.1	ASM269822v1	Contig	1.19271
GCA_002698285.1	ASM269828v1	Contig	1.00764
GCA_002698405.1	ASM269840v1	Contig	0.972382
GCA_002698465.1	ASM269846v1	Contig	1.41206
GCA_002698545.1	ASM269854v1	Contig	1.4148
GCA_002698565.1	ASM269856v1	Contig	1.33861
GCA_002698725.1	ASM269872v1	Contig	1.88758
GCA_002698805.1	ASM269880v1	Contig	1.36321
GCA_002699425.1	ASM269942v1	Contig	1.91283
GCA_002699515.1	ASM269951v1	Contig	1.59028
GCA_002699665.1	ASM269966v1	Contig	1.26305
GCA_002700555.1	ASM270055v1	Contig	1.30528
GCA_002700615.1	ASM270061v1	Contig	0.781876
GCA_002700955.2	ASM270095v2	Contig	1.66898
GCA_002701025.1	ASM270102v1	Contig	1.93795
GCA_002701145.1	ASM270114v1	Contig	1.6127
GCA_002701965.1	ASM270196v1	Contig	1.39363
GCA_002702035.1	ASM270203v1	Contig	1.67324
GCA_002702155.1	ASM270215v1	Contig	1.07672
GCA_002702305.1	ASM270230v1	Contig	1.12256
GCA_002702645.1	ASM270264v1	Contig	1.27932
GCA_002702715.1	ASM270271v1	Contig	0.897432
GCA_002702945.1	ASM270294v1	Contig	1.97888
GCA_002702985.1	ASM270298v1	Contig	1.59441
GCA_002703075.2	ASM270307v2	Contig	1.91184
GCA_002703125.1	ASM270312v1	Contig	1.32686
GCA_002703295.1	ASM270329v1	Contig	1.38233
GCA_002704515.1	ASM270451v1	Contig	1.63891
GCA_002704585.1	ASM270458v1	Contig	1.22487
GCA_002704705.1	ASM270470v1	Contig	1.24702
GCA_002704975.1	ASM270497v1	Contig	0.777458
GCA_002705285.1	ASM270528v1	Contig	1.5134
GCA_002705345.1	ASM270534v1	Contig	1.50802
GCA_002706065.1	ASM270606v1	Contig	1.89152
GCA_002706615.1	ASM270661v1	Contig	1.88807
GCA_002706635.1	ASM270663v1	Contig	1.1423
GCA_002706825.1	ASM270682v1	Contig	1.0724
GCA_002707335.2	ASM270733v2	Contig	1.2983
GCA_002708015.1	ASM270801v1	Contig	1.63516
GCA_002708275.1	ASM270827v1	Contig	1.4961
GCA_002708385.1	ASM270838v1	Contig	1.13918
GCA_002708695.1	ASM270869v1	Contig	1.76921
GCA_002708745.1	ASM270874v1	Contig	0.710946
GCA_002708785.1	ASM270878v1	Contig	1.45814
GCA_002709705.1	ASM270970v1	Contig	1.53425
GCA_002710015.1	ASM271001v1	Contig	1.70232
GCA_002710035.1	ASM271003v1	Contig	0.834643
GCA_002710205.1	ASM271020v1	Contig	1.66935
GCA_002711575.1	ASM271157v1	Contig	1.45945
GCA_002711795.1	ASM271179v1	Contig	1.24048
GCA_002711985.1	ASM271198v1	Contig	1.02167
GCA_002712285.1	ASM271228v1	Contig	1.70086
GCA_002712495.1	ASM271249v1	Contig	2.48326
GCA_002712545.1	ASM271254v1	Contig	1.40123
GCA_002712575.1	ASM271257v1	Contig	1.59075
GCA_002712645.1	ASM271264v1	Contig	1.5526
GCA_002712685.1	ASM271268v1	Contig	1.05289
GCA_002712805.2	ASM271280v2	Contig	1.27
GCA_002712925.1	ASM271292v1	Contig	1.08644
GCA_002713185.1	ASM271318v1	Contig	1.34692
GCA_002713585.1	ASM271358v1	Contig	1.72055
GCA_002713665.1	ASM271366v1	Contig	1.66589
GCA_002713925.1	ASM271392v1	Contig	1.1541
GCA_002714305.1	ASM271430v1	Contig	1.6323
GCA_002714545.1	ASM271454v1	Contig	1.90149
GCA_002714605.1	ASM271460v1	Contig	1.28706
GCA_002714745.1	ASM271474v1	Contig	1.21227
GCA_002714905.1	ASM271490v1	Contig	1.33126
GCA_002715245.1	ASM271524v1	Contig	1.80894
GCA_002715325.1	ASM271532v1	Contig	1.02537
GCA_002715545.1	ASM271554v1	Contig	1.93995
GCA_002715725.1	ASM271572v1	Contig	1.93779
GCA_002716085.1	ASM271608v1	Contig	1.57674
GCA_002716785.1	ASM271678v1	Contig	1.78136
GCA_002717835.1	ASM271783v1	Contig	1.21421
GCA_002718195.1	ASM271819v1	Contig	2.02695
GCA_002718215.1	ASM271821v1	Contig	1.57852
GCA_002718575.1	ASM271857v1	Contig	1.30062
GCA_002718695.1	ASM271869v1	Contig	1.35631
GCA_002718755.1	ASM271875v1	Contig	1.44073
GCA_002718915.1	ASM271891v1	Contig	0.881127
GCA_002718975.1	ASM271897v1	Contig	1.67439
GCA_002718995.2	ASM271899v2	Contig	1.4789
GCA_002719015.1	ASM271901v1	Contig	1.53177
GCA_002719035.1	ASM271903v1	Contig	1.1352
GCA_002719055.1	ASM271905v1	Contig	1.81763
GCA_002719255.1	ASM271925v1	Contig	1.2371
GCA_002719265.1	ASM271926v1	Contig	1.65136
GCA_002719355.1	ASM271935v1	Contig	1.31858
GCA_002719395.1	ASM271939v1	Contig	1.74437
GCA_002719455.1	ASM271945v1	Contig	1.18312
GCA_002719475.1	ASM271947v1	Contig	1.89134
GCA_002719555.1	ASM271955v1	Contig	1.35824
GCA_002719615.1	ASM271961v1	Contig	1.66952
GCA_002719635.1	ASM271963v1	Contig	0.893797
GCA_002719655.1	ASM271965v1	Contig	1.32276
GCA_002719795.1	ASM271979v1	Contig	0.871531
GCA_002719815.1	ASM271981v1	Contig	1.57083
GCA_002719965.1	ASM271996v1	Contig	1.16659
GCA_002719975.1	ASM271997v1	Contig	1.67143
GCA_002720055.1	ASM272005v1	Contig	1.56226
GCA_002720095.2	ASM272009v2	Contig	1.79994
GCA_002720115.1	ASM272011v1	Contig	2.03097
GCA_002720275.1	ASM272027v1	Contig	1.81528
GCA_002720395.1	ASM272039v1	Contig	1.08519
GCA_002721085.1	ASM272108v1	Contig	1.23163
GCA_002721855.1	ASM272185v1	Contig	0.812166
GCA_002722075.1	ASM272207v1	Contig	1.13253
GCA_002722135.1	ASM272213v1	Contig	1.93564
GCA_002722595.1	ASM272259v1	Contig	1.64162
GCA_002722615.1	ASM272261v1	Contig	1.84252
GCA_002722625.1	ASM272262v1	Contig	1.17983
GCA_002722695.1	ASM272269v1	Contig	1.62802
GCA_002722735.1	ASM272273v1	Contig	1.4002
GCA_002723045.1	ASM272304v1	Contig	0.874813
GCA_002723115.1	ASM272311v1	Contig	1.6967
GCA_002723635.1	ASM272363v1	Contig	1.33794
GCA_002724175.1	ASM272417v1	Contig	1.78475
GCA_002724535.1	ASM272453v1	Contig	1.08045
GCA_002724655.1	ASM272465v1	Contig	0.73865
GCA_002724775.1	ASM272477v1	Contig	1.24468
GCA_002724815.1	ASM272481v1	Contig	1.83791
GCA_002725245.1	ASM272524v1	Contig	1.41872
GCA_002725275.1	ASM272527v1	Contig	1.67425
GCA_002725315.1	ASM272531v1	Contig	1.41344
GCA_002725475.1	ASM272547v1	Contig	1.51951
GCA_002725535.1	ASM272553v1	Contig	1.25118
GCA_002725735.1	ASM272573v1	Contig	2.06572
GCA_002725845.1	ASM272584v1	Contig	2.55003
GCA_002726115.1	ASM272611v1	Contig	1.02631
GCA_002726275.1	ASM272627v1	Contig	1.23769
GCA_002726395.1	ASM272639v1	Contig	1.81249
GCA_002726495.1	ASM272649v1	Contig	1.7332
GCA_002726695.1	ASM272669v1	Contig	1.10474
GCA_002726845.1	ASM272684v1	Contig	1.47734
GCA_002727095.1	ASM272709v1	Scaffold	3.8611
GCA_002727105.1	ASM272710v1	Scaffold	3.32216
GCA_002727125.1	ASM272712v1	Scaffold	3.57835
GCA_002727275.1	ASM272727v1	Contig	1.38268
GCA_002727485.1	ASM272748v1	Contig	1.41169
GCA_002727515.1	ASM272751v1	Contig	1.88333
GCA_002727695.1	ASM272769v1	Contig	1.69829
GCA_002727815.1	ASM272781v1	Contig	1.25706
GCA_002728015.1	ASM272801v1	Contig	1.12617
GCA_002728035.1	ASM272803v1	Contig	1.83813
GCA_002728155.1	ASM272815v1	Contig	0.993817
GCA_002728565.1	ASM272856v1	Contig	1.38472
GCA_002728595.1	ASM272859v1	Contig	1.79031
GCA_002728885.1	ASM272888v1	Contig	1.10945
GCA_002728975.1	ASM272897v1	Contig	1.04612
GCA_002729095.1	ASM272909v1	Contig	2.03463
GCA_002729355.1	ASM272935v1	Contig	2.23055
GCA_002730005.1	ASM273000v1	Contig	1.99007
GCA_002730095.1	ASM273009v1	Contig	1.28086
GCA_002730165.1	ASM273016v1	Contig	1.32868
GCA_002730185.1	ASM273018v1	Contig	1.19961
GCA_002730445.1	ASM273044v1	Contig	1.30967
GCA_002730775.1	ASM273077v1	Contig	1.21362
GCA_002731195.1	ASM273119v1	Contig	1.11963
GCA_002731395.1	ASM273139v1	Contig	1.46004
GCA_002731465.1	ASM273146v1	Contig	1.23825
GCA_002731655.1	ASM273165v1	Contig	1.00802
GCA_002731905.1	ASM273190v1	Contig	0.968666
GCA_002731935.1	ASM273193v1	Contig	1.05909
GCA_002761295.1	ASM276129v1	Chromosome	2.08498
GCA_002779005.1	ASM277900v1	Scaffold	0.617632
GCA_002781385.1	ASM278138v1	Scaffold	1.43866
GCA_002788215.1	ASM278821v1	Complete Genome	3.33202
GCA_002790055.1	ASM279005v1	Scaffold	1.32289
GCA_002813085.1	ASM281308v1	Complete Genome	1.80554
GCA_002813655.1	ASM281365v1	Complete Genome	2.50623
GCA_002813675.1	ASM281367v1	Complete Genome	2.52433
GCA_002813695.1	ASM281369v1	Complete Genome	2.51582
GCA_002835825.1	ASM283582v1	Contig	2.61711
GCA_002839545.1	ASM283954v1	Scaffold	1.99526
GCA_002839575.1	ASM283957v1	Scaffold	2.54723
GCA_002839585.1	ASM283958v1	Scaffold	1.16636
GCA_002839605.1	ASM283960v1	Scaffold	2.59135
GCA_002839625.1	ASM283962v1	Scaffold	1.84701
GCA_002839645.1	ASM283964v1	Scaffold	2.78219
GCA_002839675.1	ASM283967v1	Scaffold	2.47008
GCA_002839685.1	ASM283968v1	Scaffold	2.27777
GCA_002839705.1	ASM283970v1	Scaffold	2.56553
GCA_002841675.1	ASM284167v1	Scaffold	0.602417
GCA_002844195.1	ASM284419v1	Scaffold	4.6154
GCA_002844335.1	ASM284433v1	Complete Genome	3.72171
GCA_002855455.1	ASM285545v1	Contig	3.69531
GCA_002906575.1	ASM290657v1	Complete Genome	4.97312
GCA_002926195.1	ASM292619v1	Scaffold	2.19546
GCA_002945325.1	ASM294532v1	Complete Genome	1.71492
GCA_002952775.1	ASM295277v1	Complete Genome	3.31312
GCA_002973515.1	ASM297351v1	Contig	1.87194
GCA_003009775.1	ASM300977v1	Scaffold	0.572429
GCA_003009795.1	ASM300979v1	Contig	0.95655
GCA_003009815.1	ASM300981v1	Scaffold	0.661323
GCA_003009825.1	ASM300982v1	Scaffold	0.397623
GCA_003009845.1	ASM300984v1	Scaffold	0.565289
GCA_003020925.1	ASM302092v1	Scaffold	2.19879
GCA_003020945.1	ASM302094v1	Scaffold	2.64729
GCA_003020965.1	ASM302096v1	Scaffold	2.95193
GCA_003020985.1	ASM302098v1	Scaffold	2.83864
GCA_003021005.1	ASM302100v1	Scaffold	2.44905
GCA_003021015.1	ASM302101v1	Scaffold	2.89124
GCA_003021045.1	ASM302104v1	Scaffold	2.57331
GCA_003021055.1	ASM302105v1	Scaffold	1.23149
GCA_003021085.1	ASM302108v1	Scaffold	3.3857
GCA_003021105.1	ASM302110v1	Scaffold	2.06882
GCA_003021115.1	ASM302111v1	Scaffold	1.38498
GCA_003021145.1	ASM302114v1	Scaffold	2.31943
GCA_003021165.1	ASM302116v1	Scaffold	1.71137
GCA_003021175.1	ASM302117v1	Scaffold	2.60566
GCA_003021205.1	ASM302120v1	Scaffold	1.5127
GCA_003021225.1	ASM302122v1	Scaffold	2.35971
GCA_003021235.1	ASM302123v1	Scaffold	3.60458
GCA_003021245.1	ASM302124v1	Scaffold	1.48821
GCA_003021285.1	ASM302128v1	Scaffold	1.96497
GCA_003021305.1	ASM302130v1	Scaffold	2.51804
GCA_003021325.1	ASM302132v1	Scaffold	1.88302
GCA_003021335.1	ASM302133v1	Scaffold	1.48771
GCA_003021365.1	ASM302136v1	Scaffold	2.1
GCA_003021655.1	ASM302165v1	Scaffold	2.73601
GCA_003021685.1	ASM302168v1	Scaffold	2.64016
GCA_003021705.1	ASM302170v1	Scaffold	2.83274
GCA_003021725.1	ASM302172v1	Scaffold	3.05316
GCA_003021745.1	ASM302174v1	Scaffold	2.20321
GCA_003021755.1	ASM302175v1	Scaffold	1.7293
GCA_003021785.1	ASM302178v1	Scaffold	2.24925
GCA_003021795.1	ASM302179v1	Scaffold	1.7522
GCA_003021975.1	ASM302197v1	Scaffold	2.60643
GCA_003022005.1	ASM302200v1	Scaffold	3.21157
GCA_003022025.1	ASM302202v1	Scaffold	2.08038
GCA_003022045.1	ASM302204v1	Scaffold	2.17807
GCA_003022055.1	ASM302205v1	Scaffold	1.62763
GCA_003022085.1	ASM302208v1	Scaffold	1.55287
GCA_003022685.1	ASM302268v1	Scaffold	2.17279
GCA_003022725.1	ASM302272v1	Scaffold	2.63122
GCA_003022745.1	ASM302274v1	Scaffold	1.78633
GCA_003022765.1	ASM302276v1	Scaffold	2.21298
GCA_003022785.1	ASM302278v1	Scaffold	1.90369
GCA_003022805.1	ASM302280v1	Scaffold	1.74528
GCA_003022815.1	ASM302281v1	Scaffold	1.49726
GCA_003022845.1	ASM302284v1	Scaffold	2.28466
GCA_003022865.1	ASM302286v1	Scaffold	1.77446
GCA_003022885.1	ASM302288v1	Scaffold	0.947951
GCA_003022905.1	ASM302290v1	Scaffold	1.51752
GCA_003022925.1	ASM302292v1	Scaffold	3.27837
GCA_003022945.1	ASM302294v1	Scaffold	2.63319
GCA_003023165.1	ASM302316v1	Scaffold	2.34856
GCA_003023185.1	ASM302318v1	Scaffold	2.01752
GCA_003023195.1	ASM302319v1	Scaffold	3.29164
GCA_003023215.1	ASM302321v1	Scaffold	1.92276
GCA_003023405.1	ASM302340v1	Scaffold	2.43832
GCA_003023415.1	ASM302341v1	Scaffold	2.23095
GCA_003023445.1	ASM302344v1	Scaffold	1.66329
GCA_003023455.1	ASM302345v1	Scaffold	1.25891
GCA_003023465.1	ASM302346v1	Scaffold	2.51076
GCA_003023485.1	ASM302348v1	Scaffold	1.56597
GCA_003023525.1	ASM302352v1	Scaffold	1.16227
GCA_003023535.1	ASM302353v1	Scaffold	1.8913
GCA_003023565.1	ASM302356v1	Scaffold	2.88259
GCA_003023575.1	ASM302357v1	Scaffold	1.3408
GCA_003023785.1	ASM302378v1	Scaffold	2.41905
GCA_003052125.1	ASM305212v1	Complete Genome	1.73761
GCA_003058365.1	ASM305836v1	Complete Genome	2.72312
GCA_003104905.1	ASM310490v1	Scaffold	2.91322
GCA_003111605.1	ASM311160v1	Contig	1.54315
GCA_003111625.1	ASM311162v1	Contig	2.24311
GCA_003132625.1	20120500_P19	Scaffold	1.41417
GCA_003133305.1	20120500_P28	Scaffold	1.50909
GCA_003134315.1	20111000_S2D	Scaffold	2.19624
GCA_003135915.1	20110800_E1S	Scaffold	1.66494
GCA_003136075.1	20120700_E1X	Scaffold	2.15746
GCA_003136455.1	20111000_E2D	Scaffold	1.22441
GCA_003137055.1	20111000_E3D	Scaffold	0.871603
GCA_003138595.1	20110800_S3D	Scaffold	1.43994
GCA_003138775.1	20110800_S2D	Scaffold	2.00133
GCA_003139235.1	20110800_S1D	Scaffold	1.36714
GCA_003139855.1	20110800_S2M	Scaffold	2.05918
GCA_003139895.1	20110800_S2D	Scaffold	1.99049
GCA_003141035.1	20120800_S1D	Scaffold	2.19952
GCA_003141075.1	20120800_S1D	Scaffold	1.92143
GCA_003141335.1	20120800_E3X	Scaffold	2.01726
GCA_003141775.1	20120800_E2D	Scaffold	1.1873
GCA_003142045.1	20120800_E1D	Scaffold	1.69895
GCA_003142655.1	20120800_E2S	Scaffold	1.61969
GCA_003149675.1	ASM314967v1	Contig	1.88148
GCA_003151535.1	20120700_P3D	Scaffold	3.16388
GCA_003153815.1	20120700_E3M	Scaffold	1.71474
GCA_003153835.1	20120700_E3M	Scaffold	1.91964
GCA_003154225.1	20120700_E3M	Scaffold	1.80986
GCA_003154335.1	20120700_E2X	Scaffold	2.14458
GCA_003155735.1	20120700_E2X	Scaffold	1.82766
GCA_003155755.1	20120700_E2D	Scaffold	1.56135
GCA_003155855.1	20120700_E1S	Scaffold	1.63256
GCA_003155875.1	20120700_E1M	Scaffold	1.76738
GCA_003156255.1	20120600_S2D	Scaffold	1.63057
GCA_003156955.1	20120600_E3M	Scaffold	1.4192
GCA_003157115.1	20120600_E3D	Scaffold	2.28214
GCA_003157235.1	20120600_E3D	Scaffold	2.91541
GCA_003157355.1	20120600_E3D	Scaffold	1.64081
GCA_003157375.1	20120600_E2D	Scaffold	2.06152
GCA_003157805.1	20120600_E2D	Scaffold	1.57073
GCA_003157895.1	20120600_E1D	Scaffold	2.03384
GCA_003157915.1	20120600_E1D	Scaffold	1.34614
GCA_003158115.1	20120600_S2D	Scaffold	2.29309
GCA_003158275.1	20120600_E3D	Scaffold	2.0975
GCA_003158635.1	20120600_E2D	Scaffold	2.25079
GCA_003158935.1	20120600_E1D	Scaffold	1.77436
GCA_003159405.1	20120700_S3X	Scaffold	1.72373
GCA_003159635.1	20120700_S3D	Scaffold	1.79048
GCA_003159695.1	20120700_S2X	Scaffold	1.44265
GCA_003160575.1	20120700_S1X	Scaffold	1.32064
GCA_003160755.1	ASM316075v1	Scaffold	1.89892
GCA_003161665.1	20110600_E3M	Scaffold	1.64563
GCA_003161735.1	20110600_E3D	Scaffold	1.43852
GCA_003161795.1	20110600_E1D	Scaffold	1.27126
GCA_003161815.1	20100900_E3D	Scaffold	1.89067
GCA_003161875.1	20100900_E3D	Scaffold	2.09816
GCA_003162075.1	20100900_E3D	Scaffold	1.17398
GCA_003162115.1	20100900_E2D	Scaffold	2.01408
GCA_003162175.1	20100900_E2D	Scaffold	1.81896
GCA_003162195.1	20100900_E1S	Scaffold	1.72292
GCA_003162535.1	20110600_E2D	Scaffold	1.81852
GCA_003162615.1	20100900_E3D	Scaffold	2.71616
GCA_003162655.1	20100900_E2S	Scaffold	1.62429
GCA_003162745.1	20100900_E1D	Scaffold	1.49035
GCA_003163455.1	20120800_S1X	Scaffold	2.03252
GCA_003163595.1	20120800_S2X	Scaffold	1.45381
GCA_003164415.1	20120700_S1D	Scaffold	2.32675
GCA_003164755.1	20120700_S1D	Scaffold	3.46849
GCA_003164775.1	20120700_S1D	Scaffold	2.20468
GCA_003165375.1	20120700_S1D	Scaffold	1.84432
GCA_003166275.1	20110700_S2M	Scaffold	1.97162
GCA_003166335.1	20110700_S2D	Scaffold	2.48852
GCA_003167795.1	20110700_S2D	Scaffold	1.03957
GCA_003168395.1	20110700_E3M	Scaffold	1.67464
GCA_003168415.1	20110700_E2M	Scaffold	1.52743
GCA_003168515.1	20110700_E1M	Scaffold	1.41053
GCA_003168535.1	20110700_E1D	Scaffold	1.79207
GCA_003168635.1	20110600_S3M	Scaffold	2.23095
GCA_003168795.1	20110600_S3M	Scaffold	1.23015
GCA_003169565.1	20110600_S2D	Scaffold	1.14952
GCA_003170075.1	20110800_E3D	Scaffold	1.92143
GCA_003170615.1	20110800_E2S	Scaffold	1.18836
GCA_003170635.1	20110800_E2M	Scaffold	1.5331
GCA_003170775.1	20110800_E2M	Scaffold	1.63672
GCA_003170935.1	20110800_E2D	Scaffold	1.79446
GCA_003170955.1	20110800_E1S	Scaffold	1.57822
GCA_003170975.1	20110800_E1M	Scaffold	2.04585
GCA_003171015.1	20110800_E1M	Scaffold	1.85096
GCA_003171385.1	20110800_E1S	Scaffold	1.71978
GCA_003173335.1	ASM317333v1	Contig	3.74074
GCA_003173355.1	ASM317335v1	Contig	3.7437
GCA_003193625.1	ASM319362v1	Contig	0.541067
GCA_003193805.1	ASM319380v1	Contig	1.38115
GCA_003193815.1	ASM319381v1	Contig	0.70183
GCA_003193825.1	ASM319382v1	Contig	1.3217
GCA_003193835.1	ASM319383v1	Contig	1.09536
GCA_003193905.1	ASM319390v1	Contig	2.60058
GCA_003194425.1	ASM319442v1	Scaffold	1.399
GCA_003194435.1	ASM319443v1	Scaffold	1.80585
GCA_003194445.1	ASM319444v1	Scaffold	3.60934
GCA_003202535.1	ASM320253v1	Contig	0.623523
GCA_003202575.1	ASM320257v1	Contig	7.41692
GCA_003202585.1	ASM320258v1	Contig	3.08572
GCA_003202615.1	ASM320261v1	Contig	1.95933
GCA_003226235.1	ASM322623v1	Contig	3.34345
GCA_003229275.1	ASM322927v1	Contig	1.22883
GCA_003229935.1	ASM322993v1	Scaffold	1.74936
GCA_003230355.1	ASM323035v1	Contig	1.2702
GCA_003249335.1	ASM324933v1	Contig	1.17896
GCA_003250025.1	ASM325002v1	Contig	0.622799
GCA_003251595.1	ASM325159v1	Contig	0.557123
GCA_003251955.1	ASM325195v1	Contig	1.6424
GCA_003264935.1	ASM326493v1	Contig	1.46787
GCA_003265405.1	ASM326540v1	Scaffold	1.7014
GCA_003266065.1	ASM326606v1	Scaffold	2.05753
GCA_003266075.1	ASM326607v1	Scaffold	2.00402
GCA_003266085.1	ASM326608v1	Contig	1.59458
GCA_003266105.1	ASM326610v1	Scaffold	1.93583
GCA_003266145.1	ASM326614v1	Scaffold	1.8598
GCA_003266165.1	ASM326616v1	Scaffold	1.7639
GCA_003266175.1	ASM326617v1	Scaffold	1.49667
GCA_003268005.1	ASM326800v1	Complete Genome	2.86809
GCA_003287355.1	ASM328735v1	Contig	3.58493
GCA_003298465.1	ASM329846v1	Contig	5.60538
GCA_003315655.1	ASM331565v1	Contig	1.91377
GCA_003315675.1	ASM331567v1	Contig	1.6977
GCA_003336245.1	ASM333624v1	Contig	3.5491
GCA_003336385.2	ASM333638v2	Scaffold	1.64775
GCA_003336485.1	ASM333648v1	Scaffold	3.18251
GCA_003342675.1	ASM334267v1	Complete Genome	3.77364
GCA_003342695.1	ASM334269v1	Complete Genome	3.52933
GCA_003344565.1	ASM334456v1	Contig	4.60607
GCA_003351065.1	ASM335106v1	Scaffold	3.879
GCA_003351865.1	ASM335186v1	Complete Genome	1.50411
GCA_003369835.1	ASM336983v1	Contig	4.37218
GCA_003382685.1	ASM338268v1	Scaffold	3.83832
GCA_003382985.1	ASM338298v1	Contig	4.01965
GCA_003383005.1	ASM338300v1	Contig	3.8842
GCA_003383015.1	ASM338301v1	Contig	3.62017
GCA_003383025.1	ASM338302v1	Scaffold	4.17621
GCA_003383065.1	ASM338306v1	Contig	3.81356
GCA_003383085.1	ASM338308v1	Contig	3.93822
GCA_003383095.1	ASM338309v1	Contig	4.01208
GCA_003383195.1	ASM338319v1	Contig	4.36621
GCA_003385755.1	ASM338575v1	Scaffold	1.70956
GCA_003430805.1	ASM343080v1	Complete Genome	3.85343
GCA_003430825.1	ASM343082v1	Complete Genome	3.78932
GCA_003439925.1	ASM343992v1	Contig	3.47334
GCA_003491285.1	ASM349128v1	Complete Genome	2.17313
GCA_003491305.1	ASM349130v1	Complete Genome	2.41739
GCA_003550375.1	ASM355037v1	Contig	1.86644
GCA_003551265.1	ASM355126v1	Contig	2.91184
GCA_003551525.1	ASM355152v1	Contig	1.11187
GCA_003551725.1	ASM355172v1	Contig	3.6767
GCA_003551755.1	ASM355175v1	Contig	1.01291
GCA_003551945.1	ASM355194v1	Contig	2.42744
GCA_003552045.1	ASM355204v1	Contig	2.58936
GCA_003552265.1	ASM355226v1	Contig	1.61123
GCA_003552325.1	ASM355232v1	Contig	2.33338
GCA_003552645.1	ASM355264v1	Contig	1.20609
GCA_003552705.1	ASM355270v1	Contig	1.99486
GCA_003552845.1	ASM355284v1	Contig	1.72373
GCA_003552885.1	ASM355288v1	Contig	1.70044
GCA_003554115.1	ASM355411v1	Contig	1.50625
GCA_003554325.1	ASM355432v1	Contig	1.9906
GCA_003554605.1	ASM355460v1	Contig	2.50274
GCA_003554885.1	ASM355488v1	Contig	3.24107
GCA_003555005.1	ASM355500v1	Contig	1.45659
GCA_003555125.1	ASM355512v1	Contig	3.00401
GCA_003555245.1	ASM355524v1	Contig	1.12322
GCA_003555325.1	ASM355532v1	Contig	1.95469
GCA_003557335.1	ASM355733v1	Contig	2.6776
GCA_003558085.1	ASM355808v1	Contig	1.85572
GCA_003558335.1	ASM355833v1	Contig	1.39079
GCA_003559215.1	ASM355921v1	Contig	3.94124
GCA_003559435.1	ASM355943v1	Contig	2.20433
GCA_003559825.1	ASM355982v1	Contig	1.82674
GCA_003560275.1	ASM356027v1	Contig	1.23933
GCA_003563815.1	ASM356381v1	Contig	3.22942
GCA_003565715.1	ASM356571v1	Contig	2.0564
GCA_003584605.1	ASM358460v1	Complete Genome	3.19406
GCA_003584625.1	ASM358462v1	Complete Genome	1.52274
GCA_003586325.1	ASM358632v1	Scaffold	4.26135
GCA_003600755.1	ASM360075v1	Contig	2.06977
GCA_003601535.1	ASM360153v1	Contig	1.6706
GCA_003601545.1	ASM360154v1	Contig	2.16304
GCA_003601555.1	ASM360155v1	Contig	1.39319
GCA_003601795.1	ASM360179v1	Contig	1.93488
GCA_003602035.1	ASM360203v1	Contig	3.87336
GCA_003605575.1	ASM360557v1	Scaffold	2.46839
GCA_003605635.1	ASM360563v1	Contig	3.00969
GCA_003610195.1	ASM361019v1	Scaffold	4.86523
GCA_003634715.1	ASM363471v1	Contig	4.45915
GCA_003650065.1	ASM365006v1	Contig	1.42506
GCA_003650075.1	ASM365007v1	Contig	1.45515
GCA_003660485.1	ASM366048v1	Contig	1.34951
GCA_003660495.1	ASM366049v1	Contig	1.20882
GCA_003660515.1	ASM366051v1	Contig	0.885738
GCA_003660545.1	ASM366054v1	Contig	1.48179
GCA_003660555.1	ASM366055v1	Contig	1.29544
GCA_003660565.1	ASM366056v1	Contig	1.52283
GCA_003660605.1	ASM366060v1	Contig	1.17395
GCA_003660625.1	ASM366062v1	Contig	1.6144
GCA_003661005.1	ASM366100v1	Contig	1.51055
GCA_003661015.1	ASM366101v1	Contig	0.815884
GCA_003661045.1	ASM366104v1	Contig	2.08615
GCA_003661065.1	ASM366106v1	Contig	0.700887
GCA_003661075.1	ASM366107v1	Contig	1.08341
GCA_003661105.1	ASM366110v1	Contig	2.25339
GCA_003661125.1	ASM366112v1	Contig	2.21259
GCA_003661135.1	ASM366113v1	Contig	1.88964
GCA_003661165.1	ASM366116v1	Contig	1.20408
GCA_003661185.1	ASM366118v1	Contig	1.69064
GCA_003661195.1	ASM366119v1	Contig	1.03297
GCA_003661465.1	ASM366146v1	Contig	0.730922
GCA_003661645.1	ASM366164v1	Contig	1.84709
GCA_003662925.1	ASM366292v1	Contig	2.62613
GCA_003662965.1	ASM366296v1	Contig	1.86071
GCA_003662985.1	ASM366298v1	Contig	2.15139
GCA_003662995.1	ASM366299v1	Contig	2.60922
GCA_003663025.1	ASM366302v1	Contig	1.86968
GCA_003663055.1	ASM366305v1	Contig	1.44879
GCA_003663505.1	ASM366350v1	Contig	1.28029
GCA_003663525.1	ASM366352v1	Contig	1.62346
GCA_003663535.1	ASM366353v1	Contig	1.65203
GCA_003663685.1	ASM366368v1	Contig	1.26765
GCA_003663695.1	ASM366369v1	Contig	1.36349
GCA_003665865.1	ASM366586v1	Contig	3.87937
GCA_003665885.1	ASM366588v1	Contig	4.19145
GCA_003665905.1	ASM366590v1	Contig	3.88855
GCA_003665925.1	ASM366592v1	Contig	3.87139
GCA_003665935.1	ASM366593v1	Contig	3.54807
GCA_003665955.1	ASM366595v1	Contig	3.50679
GCA_003665985.1	ASM366598v1	Contig	4.13314
GCA_003666005.1	ASM366600v1	Contig	3.90935
GCA_003666015.1	ASM366601v1	Contig	4.14043
GCA_003666025.1	ASM366602v1	Contig	3.30715
GCA_003666065.1	ASM366606v1	Contig	4.54443
GCA_003670115.1	ASM367011v1	Contig	4.66568
GCA_003675855.1	ASM367585v1	Contig	3.73552
GCA_003675875.1	ASM367587v1	Scaffold	4.11701
GCA_003688715.1	ASM368871v1	Scaffold	3.50731
GCA_003694965.1	ASM369496v1	Contig	0.644393
GCA_003695745.1	ASM369574v1	Contig	1.28496
GCA_003696825.1	ASM369682v1	Contig	5.75386
GCA_003697815.1	ASM369781v1	Scaffold	3.61003
GCA_003697845.1	ASM369784v1	Scaffold	3.59298
GCA_003721175.2	ASM372117v2	Complete Genome	3.17588
GCA_003721435.2	ASM372143v2	Complete Genome	3.58228
GCA_003722055.1	ASM372205v1	Contig	2.02154
GCA_003722075.1	MethanohalophilusRSK	Contig	1.96904
GCA_003722095.1	ASM372209v1	Contig	2.66102
GCA_003722115.1	ASM372211v1	Contig	2.07914
GCA_003722155.1	ASM372215v1	Contig	1.87053
GCA_003730195.1	ASM373019v1	Contig	5.07289
GCA_003781945.1	ASM378194v1	Contig	3.71546
GCA_003814835.1	ASM381483v1	Scaffold	1.87803
GCA_003819845.1	ASM381984v1	Contig	2.67945
GCA_003820275.1	ASM382027v1	Contig	1.48654
GCA_003838065.1	ASM383806v1	Contig	1.688
GCA_003838185.1	ASM383818v1	Contig	1.78043
GCA_003838235.1	ASM383823v1	Contig	1.53302
GCA_003841465.1	ASM384146v1	Contig	4.61448
GCA_003841485.1	ASM384148v1	Contig	3.51122
GCA_003841505.1	ASM384150v1	Contig	4.56649
GCA_003856835.1	ASM385683v1	Complete Genome	3.50309
GCA_003857025.1	ASM385702v1	Contig	3.16101
GCA_003862495.1	ASM386249v1	Contig	3.65469
GCA_003935005.1	ASM393500v1	Scaffold	2.12852
GCA_003940385.1	ASM394038v1	Contig	1.44266
GCA_003940405.1	ASM394040v1	Contig	1.60447
GCA_003977755.1	ASM397775v1	Scaffold	4.9607
GCA_003978865.1	ASM397886v1	Contig	1.10672
GCA_003990725.2	ASM399072v2	Complete Genome	3.04447
GCA_003992375.1	ASM399237v1	Contig	3.31667
GCA_003992425.1	ASM399242v1	Contig	4.11183
GCA_004015825.1	ASM401582v1	Scaffold	3.75751
GCA_004087835.1	ASM408783v1	Complete Genome	3.49092
GCA_004099695.1	ASM409969v1	Contig	3.55878
GCA_004102725.1	ASM410272v1	Scaffold	2.75072
GCA_004104135.1	ASM410413v1	Contig	1.92872
GCA_004114375.1	ASM411437v1	Complete Genome	3.66843
GCA_004114995.1	ASM411499v1	Scaffold	3.63076
GCA_004116405.1	ASM411640v1	Contig	4.89113
GCA_004118325.1	ASM411832v1	Scaffold	4.08767
GCA_004126515.1	ASM412651v1	Complete Genome	3.7263
GCA_004137855.1	ASM413785v1	Scaffold	1.83009
GCA_004143485.2	ASM414348v2	Scaffold	3.77926
GCA_004144665.1	ASM414466v1	Contig	1.82624
GCA_004144985.1	ASM414498v1	Contig	1.44727
GCA_004150385.1	ASM415038v1	Scaffold	3.58983
GCA_004150395.1	ASM415039v1	Scaffold	4.00178
GCA_004193545.1	ASM419354v1	Contig	1.99085
GCA_004195425.1	ASM419542v1	Contig	2.39015
GCA_004195445.1	ASM419544v1	Contig	1.24638
GCA_004195515.1	ASM419551v1	Contig	1.92027
GCA_004195525.1	ASM419552v1	Contig	1.59569
GCA_004195535.1	ASM419553v1	Contig	1.02451
GCA_004195545.1	ASM419554v1	Contig	2.27304
GCA_004195585.1	ASM419558v1	Contig	2.39878
GCA_004195615.1	ASM419561v1	Contig	1.63243
GCA_004195625.1	ASM419562v1	Contig	1.49994
GCA_004195635.1	ASM419563v1	Contig	1.75102
GCA_004195645.1	ASM419564v1	Contig	0.836089
GCA_004195655.1	ASM419565v1	Contig	1.23466
GCA_004195715.1	ASM419571v1	Contig	1.44826
GCA_004209855.1	ASM420985v1	Scaffold	3.66608
GCA_004211975.1	ASM421197v1	Scaffold	2.6561
GCA_004212035.1	ASM421203v1	Contig	1.27651
GCA_004212075.1	ASM421207v1	Contig	1.25714
GCA_004212085.1	ASM421208v1	Contig	1.66406
GCA_004212095.1	ASM421209v1	Contig	1.45881
GCA_004212135.1	ASM421213v1	Scaffold	2.03025
GCA_004217335.1	ASM421733v1	Contig	4.25655
GCA_004294765.1	ASM429476v1	Scaffold	2.78236
GCA_004297185.1	ASM429718v1	Contig	2.35725
GCA_004298585.1	ASM429858v1	Contig	1.31795
GCA_004310395.1	ASM431039v1	Contig	1.30815
GCA_004332335.1	ASM433233v1	Contig	2.36712
GCA_004340645.1	ASM434064v1	Contig	1.97802
GCA_004347815.1	ASM434781v1	Contig	1.06446
GCA_004347825.1	ASM434782v1	Contig	1.55731
GCA_004347835.1	ASM434783v1	Contig	1.0729
GCA_004347845.1	ASM434784v1	Contig	1.56752
GCA_004347865.1	ASM434786v1	Contig	1.51442
GCA_004347925.1	ASM434792v1	Contig	1.24144
GCA_004363215.1	ASM436321v1	Scaffold	1.78332
GCA_004366975.1	ASM436697v1	Contig	1.86124
GCA_004366995.1	ASM436699v1	Contig	2.35857
GCA_004367345.1	ASM436734v1	Contig	2.04631
GCA_004375695.1	ASM437569v1	Contig	0.629636
GCA_004375795.1	ASM437579v1	Contig	0.451393
GCA_004376755.1	ASM437675v1	Contig	0.518473
GCA_004521895.1	ASM452189v1	Contig	3.61966
GCA_004525205.1	ASM452520v1	Contig	0.949492
GCA_004526155.1	ASM452615v1	Contig	2.46068
GCA_004526185.1	ASM452618v1	Contig	1.40501
GCA_004553595.1	ASM455359v1	Contig	2.7707
GCA_004681185.1	ASM468118v1	Scaffold	5.03856
GCA_004698125.1	ASM469812v1	Scaffold	4.46737
GCA_004745425.1	ASM474542v1	Contig	2.59221
GCA_004762015.1	ASM476201v1	Contig	3.86856
GCA_004765785.1	ASM476578v1	Scaffold	4.31831
GCA_004765795.1	ASM476579v1	Scaffold	3.76372
GCA_004765805.1	ASM476580v1	Scaffold	3.93395
GCA_004765815.2	ASM476581v2	Scaffold	4.75324
GCA_004785955.1	ASM478595v1	Scaffold	3.74523
GCA_004799605.1	ASM479960v1	Complete Genome	2.42968
GCA_004799625.1	ASM479962v1	Complete Genome	4.90498
GCA_004799645.1	ASM479964v1	Complete Genome	4.38241
GCA_004799665.1	ASM479966v1	Complete Genome	3.45206
GCA_004799685.1	ASM479968v1	Complete Genome	3.74989
GCA_004803735.1	ASM480373v1	Complete Genome	3.31606
GCA_004916935.1	ASM491693v1	Contig	4.40389
GCA_004916945.1	ASM491694v1	Contig	4.41308
GCA_004944975.1	ASM494497v1	Scaffold	3.46493
GCA_005049285.1	ASM504928v1	Contig	3.66113
GCA_005155585.1	ASM515558v1	Complete Genome	3.0517
GCA_005222995.1	ASM522299v1	Contig	0.988622
GCA_005239135.1	ASM523913v1	Contig	2.90442
GCA_005239175.1	ASM523917v1	Scaffold	3.35967
GCA_005239425.1	ASM523942v1	Scaffold	4.74282
GCA_005239435.1	ASM523943v1	Scaffold	5.15461
GCA_005310945.1	ASM531094v1	Complete Genome	4.18492
GCA_005406125.1	ASM540612v1	Contig	4.21727
GCA_005406325.1	ASM540632v1	Complete Genome	3.90747
GCA_005435015.1	ASM543501v1	Scaffold	3.65072
GCA_005435025.1	ASM543502v1	Scaffold	3.60532
GCA_005435035.1	ASM543503v1	Scaffold	3.7344
GCA_005435045.1	ASM543504v1	Scaffold	4.842
GCA_005435055.1	ASM543505v1	Scaffold	3.62994
GCA_005435095.1	ASM543509v1	Scaffold	3.52066
GCA_005435115.1	ASM543511v1	Contig	3.32569
GCA_005435135.1	ASM543513v1	Scaffold	3.6227
GCA_005435165.1	ASM543516v1	Contig	3.32121
GCA_005435175.1	ASM543517v1	Scaffold	3.4793
GCA_005435185.1	ASM543518v1	Scaffold	5.82283
GCA_005435195.1	ASM543519v1	Scaffold	3.40661
GCA_005435225.1	ASM543522v1	Contig	3.37818
GCA_005435235.1	ASM543523v1	Contig	3.61285
GCA_005485005.1	ASM548500v1	Chromosome	4.18673
GCA_005504395.1	ASM550439v1	Scaffold	1.41728
GCA_005543295.1	ASM554329v1	Scaffold	3.41621
GCA_005576615.1	ASM557661v1	Complete Genome	4.67447
GCA_005878325.1	ASM587832v1	Scaffold	1.76321
GCA_005878375.1	ASM587837v1	Scaffold	1.66895
GCA_005878385.1	ASM587838v1	Scaffold	1.8741
GCA_005878395.1	ASM587839v1	Scaffold	2.16955
GCA_005878405.1	ASM587840v1	Scaffold	2.09087
GCA_005878415.1	ASM587841v1	Scaffold	1.74337
GCA_005878475.1	ASM587847v1	Contig	1.53478
GCA_005878485.1	ASM587848v1	Scaffold	2.0815
GCA_005878495.1	ASM587849v1	Contig	1.61545
GCA_005878515.1	ASM587851v1	Contig	1.83686
GCA_005878525.1	ASM587852v1	Scaffold	2.01647
GCA_005878575.1	ASM587857v1	Scaffold	1.57373
GCA_005878585.1	ASM587858v1	Scaffold	1.91953
GCA_005878615.1	ASM587861v1	Scaffold	1.95534
GCA_005878625.1	ASM587862v1	Scaffold	1.67617
GCA_005878635.1	ASM587863v1	Scaffold	1.95202
GCA_005878665.1	ASM587866v1	Scaffold	1.74994
GCA_005878875.1	ASM587887v1	Scaffold	1.52452
GCA_005878905.1	ASM587890v1	Scaffold	1.92829
GCA_005878915.1	ASM587891v1	Scaffold	2.12063
GCA_005878955.1	ASM587895v1	Scaffold	2.14972
GCA_005878965.1	ASM587896v1	Scaffold	1.94914
GCA_005878985.1	ASM587898v1	Scaffold	2.11099
GCA_005878995.1	ASM587899v1	Scaffold	1.6722
GCA_005879015.1	ASM587901v1	Scaffold	1.57793
GCA_005879045.1	ASM587904v1	Scaffold	1.6958
GCA_005879065.1	ASM587906v1	Scaffold	1.83707
GCA_005879105.1	ASM587910v1	Contig	2.05804
GCA_005890195.1	ASM589019v1	Complete Genome	3.77809
GCA_005924185.1	ASM592418v1	Scaffold	2.2459
GCA_005938085.1	ASM593808v1	Contig	4.26302
GCA_005954745.1	ASM595474v1	Complete Genome	3.94245
GCA_006274605.1	ASM627460v1	Complete Genome	2.23401
GCA_006543045.1	ASM654304v1	Scaffold	4.52154
GCA_006546655.1	ASM654665v1	Contig	2.92017
GCA_006861655.1	ASM686165v1	Scaffold	2.56434
GCA_006861665.1	ASM686166v1	Scaffold	2.84144
GCA_006864335.1	ASM686433v1	Contig	3.34359
GCA_007004735.1	ASM700473v1	Scaffold	4.1968
GCA_007118075.1	ASM711807v1	Contig	1.83071
GCA_007118145.1	ASM711814v1	Contig	1.72344
GCA_007118975.1	ASM711897v1	Contig	3.43251
GCA_007119345.1	ASM711934v1	Contig	3.85527
GCA_007121125.1	ASM712112v1	Contig	2.79159
GCA_007121215.1	ASM712121v1	Contig	2.57442
GCA_007121475.1	ASM712147v1	Contig	1.40416
GCA_007121575.1	ASM712157v1	Contig	1.87733
GCA_007122115.1	ASM712211v1	Contig	2.53568
GCA_007122455.1	ASM712245v1	Contig	2.9333
GCA_007122825.1	ASM712282v1	Contig	1.78863
GCA_007122875.1	ASM712287v1	Contig	1.8954
GCA_007123025.1	ASM712302v1	Contig	1.52552
GCA_007123105.1	ASM712310v1	Contig	1.87782
GCA_007125235.1	ASM712523v1	Contig	2.1199
GCA_007125715.1	ASM712571v1	Contig	3.25845
GCA_007127355.1	ASM712735v1	Contig	2.34422
GCA_007127385.1	ASM712738v1	Contig	1.33393
GCA_007127735.1	ASM712773v1	Contig	1.62763
GCA_007128515.1	ASM712851v1	Contig	2.4681
GCA_007129135.1	ASM712913v1	Contig	2.69899
GCA_007130175.1	ASM713017v1	Contig	2.50937
GCA_007130455.1	ASM713045v1	Contig	1.44914
GCA_007131485.1	ASM713148v1	Contig	2.56189
GCA_007134425.1	ASM713442v1	Contig	2.57385
GCA_007135435.1	ASM713543v1	Contig	3.11084
GCA_007135505.1	ASM713550v1	Contig	2.4444
GCA_007279835.1	ASM727983v1	Contig	0.688356
GCA_007280025.1	ASM728002v1	Contig	1.86131
GCA_007421925.1	ASM742192v1	Scaffold	4.00436
GCA_007655485.1	ASM765548v1	Scaffold	3.35154
GCA_007671685.1	ASM767168v1	Scaffold	3.67496
GCA_007671725.1	ASM767172v1	Contig	3.18286
GCA_007714225.1	ASM771422v1	Contig	3.78434
GCA_007833275.1	ASM783327v1	Complete Genome	2.52337
GCA_007896465.1	ASM789646v1	Contig	4.89392
GCA_008033705.1	ASM803370v1	Complete Genome	1.74103
GCA_008122205.1	ASM812220v1	Contig	5.31681
GCA_008124605.1	ASM812460v1	Contig	2.36491
GCA_008152015.1	ASM815201v1	Complete Genome	2.16504
GCA_008245085.1	ASM824508v1	Complete Genome	1.88991
GCA_008245225.1	ASM824522v1	Contig	4.20149
GCA_008728975.1	ASM872897v1	Contig	4.33459
GCA_008729005.1	ASM872900v1	Contig	3.999
GCA_008729015.1	ASM872901v1	Contig	4.04855
GCA_008729095.1	ASM872909v1	Contig	3.89689
GCA_008806815.1	ASM880681v1	Contig	3.56169
GCA_008806895.1	ASM880689v1	Contig	3.25527
GCA_008806905.1	ASM880690v1	Contig	3.4807
GCA_008806915.1	ASM880691v1	Contig	3.48711
GCA_008831545.1	ASM883154v1	Complete Genome	4.45073
GCA_008933945.1	ASM893394v1	Contig	3.80197
GCA_009176545.1	ASM917654v1	Contig	4.69083
GCA_009184545.1	ASM918454v1	Scaffold	2.6606
GCA_009184555.1	ASM918455v1	Contig	2.43505
GCA_009184575.1	ASM918457v1	Scaffold	2.42211
GCA_009217585.1	ASM921758v1	Complete Genome	3.0942
GCA_009372125.1	ASM937212v1	Contig	1.9261
GCA_009392895.1	ASM939289v1	Complete Genome	4.34848
GCA_009617995.1	ASM961799v1	Complete Genome	3.32903
GCA_009618475.1	ASM961847v1	Contig	1.09343
GCA_009619155.1	ASM961915v1	Contig	1.2945
GCA_009649835.1	ASM964983v1	Scaffold	1.81303
GCA_009663395.1	ASM966339v1	Scaffold	2.76822
GCA_009674585.1	ASM967458v1	Contig	3.48711
GCA_009674605.1	ASM967460v1	Contig	3.56169
GCA_009674625.1	ASM967462v1	Contig	3.4807
GCA_009690625.1	ASM969062v1	Complete Genome	2.62839
GCA_009712615.1	ASM971261v1	Scaffold	2.1813
GCA_009741785.1	ASM974178v1	Contig	3.79862
GCA_009741825.1	ASM974182v1	Contig	2.96502
GCA_009741925.1	ASM974192v1	Contig	3.45203
GCA_009741955.1	ASM974195v1	Contig	4.09566
GCA_009741975.1	ASM974197v1	Contig	2.73087
GCA_009742825.1	ASM974282v1	Contig	3.23017
GCA_009758285.1	ASM975828v1	Contig	1.18994
GCA_009758305.1	ASM975830v1	Contig	1.40341
GCA_009758405.1	ASM975840v1	Contig	1.3027
GCA_009762275.1	ASM976227v1	Complete Genome	3.5603
GCA_009776495.1	ASM977649v1	Contig	1.52799
GCA_009776675.1	ASM977667v1	Contig	1.39719
GCA_009777005.1	ASM977700v1	Contig	2.88461
GCA_009779205.1	ASM977920v1	Contig	1.24535
GCA_009783635.1	ASM978363v1	Contig	1.33324
GCA_009784005.1	ASM978400v1	Contig	1.68858
GCA_009784145.1	ASM978414v1	Contig	1.50706
GCA_009789175.1	ASM978917v1	Complete Genome	3.73236
GCA_009791395.1	ASM979139v1	Contig	4.06971
GCA_009797925.1	ASM979792v1	Contig	2.61766
GCA_009806985.1	ASM980698v1	Scaffold	3.10882
GCA_009807105.1	ASM980710v1	Scaffold	4.16263
GCA_009831455.1	ASM983145v1	Contig	3.36902
GCA_009831555.1	ASM983155v1	Contig	3.49948
GCA_009831575.1	ASM983157v1	Contig	3.24592
GCA_009831625.1	ASM983162v1	Contig	3.77577
GCA_009834785.1	ASM983478v1	Scaffold	4.55677
GCA_009856205.1	ASM985620v1	Contig	3.37964
GCA_009856455.1	ASM985645v1	Contig	3.20793
GCA_009889625.1	ASM988962v1	Contig	1.0678
GCA_009889635.1	ASM988963v1	Contig	1.13197
GCA_009889655.1	ASM988965v1	Contig	1.00743
GCA_009889665.1	ASM988966v1	Contig	1.1225
GCA_009889685.1	ASM988968v1	Contig	0.920269
GCA_009900715.1	ASM990071v1	Scaffold	3.52198
GCA_009903405.1	ASM990340v1	Scaffold	1.5313
GCA_009903435.1	ASM990343v1	Scaffold	1.86817
GCA_009914355.1	ASM991435v1	Complete Genome	1.7245
GCA_009914725.1	ASM991472v1	Contig	2.18936
GCA_009917665.1	ASM991766v1	Complete Genome	1.69793
GCA_009928975.1	ASM992897v1	Contig	1.10859
GCA_009936765.1	ASM993676v1	Contig	1.74099
GCA_009937025.1	ASM993702v1	Contig	1.88482
GCA_009937205.1	ASM993720v1	Contig	1.77119
GCA_010028355.1	ASM1002835v1	Contig	2.11875
GCA_010028405.1	ASM1002840v1	Contig	1.51324
GCA_010030345.1	ASM1003034v1	Contig	1.18284
GCA_010030405.1	ASM1003040v1	Contig	1.21963
GCA_010030415.1	ASM1003041v1	Contig	1.17846
GCA_010030465.1	ASM1003046v1	Contig	1.17364
GCA_010092465.1	ASM1009246v1	Complete Genome	2.89061
GCA_010119195.1	ASM1011919v1	Scaffold	3.7881
GCA_010119205.1	ASM1011920v1	Contig	3.90668
GCA_010692885.1	ASM1069288v1	Complete Genome	3.99432
GCA_010692905.1	ASM1069290v1	Complete Genome	3.70698
GCA_010706455.1	ASM1070645v1	Complete Genome	4.32315
GCA_010747475.1	ASM1074747v1	Contig	4.40856
GCA_011039715.1	ASM1103971v1	Contig	0.781393
GCA_011039765.1	ASM1103976v1	Contig	1.81903
GCA_011039865.1	ASM1103986v1	Contig	0.84755
GCA_011040025.1	ASM1104002v1	Contig	1.22315
GCA_011040275.1	ASM1104027v1	Contig	0.568565
GCA_011040315.1	ASM1104031v1	Contig	1.60373
GCA_011040725.1	ASM1104072v1	Contig	0.479161
GCA_011040755.1	ASM1104075v1	Contig	0.590108
GCA_011040935.1	ASM1104093v1	Contig	1.42531
GCA_011041675.1	ASM1104167v1	Contig	0.84747
GCA_011041875.1	ASM1104187v1	Contig	0.933646
GCA_011041935.1	ASM1104193v1	Contig	0.90486
GCA_011042615.1	ASM1104261v1	Contig	1.19853
GCA_011042965.1	ASM1104296v1	Contig	1.26886
GCA_011043045.1	ASM1104304v1	Contig	0.329241
GCA_011043275.1	ASM1104327v1	Contig	0.98104
GCA_011043475.1	ASM1104347v1	Contig	1.43121
GCA_011043775.1	ASM1104377v1	Contig	4.56299
GCA_011043905.1	ASM1104390v1	Contig	1.25443
GCA_011045995.1	ASM1104599v1	Contig	1.5685
GCA_011046235.1	ASM1104623v1	Contig	1.56795
GCA_011048505.1	ASM1104850v1	Contig	0.526401
GCA_011048835.1	ASM1104883v1	Contig	1.9944
GCA_011048945.1	ASM1104894v1	Contig	0.727582
GCA_011049045.1	ASM1104904v1	Contig	2.00379
GCA_011049415.1	ASM1104941v1	Contig	1.55252
GCA_011050175.1	ASM1105017v1	Contig	1.17305
GCA_011050765.1	ASM1105076v1	Contig	1.16306
GCA_011052315.1	ASM1105231v1	Contig	0.440745
GCA_011052505.1	ASM1105250v1	Contig	0.472126
GCA_011052865.1	ASM1105286v1	Contig	1.54407
GCA_011055505.1	ASM1105550v1	Contig	0.483385
GCA_011056505.1	ASM1105650v1	Contig	0.655916
GCA_011371175.1	ASM1137117v1	Contig	0.670833
GCA_011371495.1	ASM1137149v1	Contig	2.17811
GCA_011372205.1	ASM1137220v1	Contig	0.317886
GCA_011372835.1	ASM1137283v1	Contig	1.11026
GCA_011374335.1	ASM1137433v1	Contig	1.47152
GCA_011374435.1	ASM1137443v1	Contig	0.741501
GCA_011391345.1	ASM1139134v1	Contig	1.0814
GCA_011391755.1	ASM1139175v1	Contig	1.52606
GCA_011440255.1	ASM1144025v1	Scaffold	4.52868
GCA_011440285.1	ASM1144028v1	Contig	4.117
GCA_011440375.1	ASM1144037v1	Scaffold	3.76446
GCA_011440385.1	ASM1144038v1	Contig	4.37218
GCA_011522915.1	ASM1152291v1	Scaffold	1.80474
GCA_011523055.1	ASM1152305v1	Scaffold	1.45433
GCA_011523085.1	ASM1152308v1	Scaffold	1.49727
GCA_011523185.1	ASM1152318v1	Scaffold	1.46583
GCA_011524855.1	ASM1152485v1	Scaffold	1.94389
GCA_011525095.1	ASM1152509v1	Scaffold	1.72109
GCA_011526375.1	ASM1152637v1	Scaffold	2.22825
GCA_011526465.1	ASM1152646v1	Scaffold	1.45031
GCA_011602445.1	ASM1160244v1	Complete Genome	4.93083
GCA_011605865.1	ASM1160586v1	Contig	1.26973
GCA_011605875.1	ASM1160587v1	Contig	1.46752
GCA_011620785.1	ASM1162078v1	Scaffold	2.08808
GCA_011620795.1	ASM1162079v1	Scaffold	2.37364
GCA_011620845.1	ASM1162084v1	Scaffold	1.86549
GCA_011620885.1	ASM1162088v1	Scaffold	1.86154
GCA_011627345.1	ASM1162734v1	Scaffold	3.1615
GCA_011627385.1	ASM1162738v1	Contig	4.11183
GCA_011734195.1	ASM1173419v1	Contig	2.98309
GCA_011765365.1	ASM1176536v1	Complete Genome	2.81855
GCA_012026795.1	ASM1202679v1	Scaffold	3.58555
GCA_012026835.1	ASM1202683v1	Contig	3.32187
GCA_012027285.1	ASM1202728v1	Contig	1.93168
GCA_012027305.1	ASM1202730v1	Contig	2.023
GCA_012027325.1	ASM1202732v1	Contig	2.27737
GCA_012027355.1	ASM1202735v1	Contig	2.16752
GCA_012027375.1	ASM1202737v1	Contig	2.29201
GCA_012027395.1	ASM1202739v1	Contig	2.00236
GCA_012027415.1	ASM1202741v1	Contig	1.81215
GCA_012027425.1	ASM1202742v1	Contig	1.98269
GCA_012027455.1	ASM1202745v1	Contig	2.01444
GCA_012027495.1	ASM1202749v1	Contig	2.13937
GCA_012027515.1	ASM1202751v1	Contig	2.00841
GCA_012027535.1	ASM1202753v1	Contig	1.93985
GCA_012027545.1	ASM1202754v1	Contig	2.04559
GCA_012027555.1	ASM1202755v1	Contig	1.79546
GCA_012027595.1	ASM1202759v1	Contig	2.0488
GCA_012027615.1	ASM1202761v1	Contig	2.37488
GCA_012027635.1	ASM1202763v1	Contig	1.92184
GCA_012027645.1	ASM1202764v1	Contig	1.9914
GCA_012027685.1	ASM1202768v1	Contig	1.98679
GCA_012062385.1	ASM1206238v1	Contig	1.91526
GCA_012163165.1	ASM1216316v1	Scaffold	4.05165
GCA_012329085.1	ASM1232908v1	Contig	2.36933
GCA_012510295.1	ASM1251029v1	Contig	1.9001
GCA_012510335.1	ASM1251033v1	Contig	1.84078
GCA_012511245.1	ASM1251124v1	Contig	2.22491
GCA_012513095.1	ASM1251309v1	Contig	1.51993
GCA_012513695.1	ASM1251369v1	Contig	1.34598
GCA_012516785.1	ASM1251678v1	Contig	1.96311
GCA_012516895.1	ASM1251689v1	Contig	2.18897
GCA_012517695.1	ASM1251769v1	Contig	2.20312
GCA_012518185.1	ASM1251818v1	Contig	1.59641
GCA_012518265.1	ASM1251826v1	Contig	1.51357
GCA_012519255.1	ASM1251925v1	Contig	1.74665
GCA_012519275.1	ASM1251927v1	Contig	3.18308
GCA_012520015.1	ASM1252001v1	Contig	2.40737
GCA_012521035.1	ASM1252103v1	Contig	2.24264
GCA_012521115.1	ASM1252111v1	Contig	1.55138
GCA_012521495.1	ASM1252149v1	Contig	2.11399
GCA_012521595.1	ASM1252159v1	Contig	1.90481
GCA_012522315.1	ASM1252231v1	Contig	2.7238
GCA_012522975.1	ASM1252297v1	Contig	3.07479
GCA_012523385.1	ASM1252338v1	Contig	1.66927
GCA_012719315.1	ASM1271931v1	Contig	0.977586
GCA_012719515.1	ASM1271951v1	Contig	3.01926
GCA_012719835.1	ASM1271983v1	Contig	1.49649
GCA_012726095.1	ASM1272609v1	Scaffold	3.39584
GCA_012726105.1	ASM1272610v1	Scaffold	3.66966
GCA_012726115.1	ASM1272611v1	Scaffold	4.01327
GCA_012726155.1	ASM1272615v1	Scaffold	3.92899
GCA_012728895.1	ASM1272889v1	Contig	2.27612
GCA_012729025.1	ASM1272902v1	Contig	2.42099
GCA_012729095.1	ASM1272909v1	Contig	1.68043
GCA_012729535.1	ASM1272953v1	Contig	3.09444
GCA_012729995.1	ASM1272999v1	Contig	2.80663
GCA_012797575.1	ASM1279757v1	Contig	1.88601
GCA_012797645.1	ASM1279764v1	Contig	1.72367
GCA_012797855.1	ASM1279785v1	Contig	3.16644
GCA_012798025.1	ASM1279802v1	Contig	1.73709
GCA_012798255.1	ASM1279825v1	Contig	2.01683
GCA_012798365.1	ASM1279836v1	Contig	2.64011
GCA_012799355.1	ASM1279935v1	Contig	2.10162
GCA_012799835.1	ASM1279983v1	Contig	1.93542
GCA_012800035.1	ASM1280003v1	Contig	1.85924
GCA_012800945.1	ASM1280094v1	Contig	2.13237
GCA_012838075.1	ASM1283807v1	Contig	1.77786
GCA_012838205.1	ASM1283820v1	Contig	1.87372
GCA_012839505.1	ASM1283950v1	Contig	3.24837
GCA_012840175.1	ASM1284017v1	Contig	1.42324
GCA_012840205.1	ASM1284020v1	Contig	1.54195
GCA_012842025.1	ASM1284202v1	Contig	1.45074
GCA_012910725.1	ASM1291072v1	Scaffold	1.24594
GCA_012927665.1	ASM1292766v1	Contig	0.155723
GCA_012927685.1	ASM1292768v1	Contig	0.337773
GCA_012927695.1	ASM1292769v1	Contig	0.619468
GCA_012927715.1	ASM1292771v1	Contig	0.284101
GCA_012927765.1	ASM1292776v1	Contig	0.420777
GCA_012933645.1	ASM1293364v1	Contig	2.37297
GCA_012961645.1	ASM1296164v1	Contig	1.66399
GCA_012962055.1	ASM1296205v1	Contig	0.745249
GCA_012962105.1	ASM1296210v1	Contig	0.73804
GCA_012962495.1	ASM1296249v1	Contig	1.67365
GCA_012962515.1	ASM1296251v1	Contig	1.40115
GCA_012962625.1	ASM1296262v1	Contig	1.94801
GCA_012979255.1	ASM1297925v1	Scaffold	1.3415
GCA_013003705.1	ASM1300370v1	Contig	1.95399
GCA_013003855.1	ASM1300385v1	Contig	1.79032
GCA_013041945.1	ASM1304194v1	Contig	2.3678
GCA_013138665.1	ASM1313866v1	Contig	1.34164
GCA_013138765.1	ASM1313876v1	Contig	1.26271
GCA_013138895.1	ASM1313889v1	Contig	1.58367
GCA_013138905.1	ASM1313890v1	Contig	0.872686
GCA_013139685.1	ASM1313968v1	Contig	2.72241
GCA_013139715.1	ASM1313971v1	Contig	1.62383
GCA_013139985.1	ASM1313998v1	Contig	2.12519
GCA_013151125.1	ASM1315112v1	Scaffold	1.35204
GCA_013152685.1	ASM1315268v1	Scaffold	1.80081
GCA_013152845.1	ASM1315284v1	Scaffold	1.17296
GCA_013152995.1	ASM1315299v1	Scaffold	0.827235
GCA_013153595.1	ASM1315359v1	Contig	1.17519
GCA_013153845.1	ASM1315384v1	Contig	1.42914
GCA_013154005.1	ASM1315400v1	Contig	1.63514
GCA_013154335.1	ASM1315433v1	Contig	1.37347
GCA_013166765.1	ASM1316676v1	Contig	5.63688
GCA_013177915.1	ASM1317791v1	Contig	1.83206
GCA_013178175.1	ASM1317817v1	Contig	1.55733
GCA_013178225.1	ASM1317822v1	Contig	2.97855
GCA_013178285.1	ASM1317828v1	Contig	2.11861
GCA_013180565.1	ASM1318056v1	Scaffold	2.72725
GCA_013180585.1	ASM1318058v1	Scaffold	2.19292
GCA_013180605.1	ASM1318060v1	Scaffold	2.34429
GCA_013201385.1	ASM1320138v1	Contig	2.04232
GCA_013201445.1	ASM1320144v1	Contig	2.32329
GCA_013267195.1	ASM1326719v1	Complete Genome	3.34025
GCA_013288705.1	ASM1328870v1	Scaffold	1.62907
GCA_013290045.1	ASM1329004v1	Contig	2.22765
GCA_013329085.1	ASM1332908v1	Scaffold	1.56618
GCA_013329165.1	ASM1332916v1	Scaffold	1.9324
GCA_013329335.1	ASM1332933v1	Scaffold	1.51587
GCA_013329415.1	ASM1332941v1	Scaffold	3.85524
GCA_013329455.1	ASM1332945v1	Scaffold	2.1715
GCA_013329555.1	ASM1332955v1	Scaffold	1.01106
GCA_013329575.1	ASM1332957v1	Scaffold	1.2431
GCA_013329655.1	ASM1332965v1	Scaffold	4.25736
GCA_013329685.1	ASM1332968v1	Scaffold	1.17041
GCA_013329715.1	ASM1332971v1	Scaffold	1.42606
GCA_013329775.1	ASM1332977v1	Scaffold	1.72464
GCA_013330005.1	ASM1333000v1	Scaffold	0.761354
GCA_013330315.1	ASM1333031v1	Scaffold	2.34003
GCA_013330355.1	ASM1333035v1	Scaffold	1.19702
GCA_013330365.1	ASM1333036v1	Scaffold	1.85465
GCA_013330375.1	ASM1333037v1	Scaffold	1.21072
GCA_013330395.1	ASM1333039v1	Scaffold	1.68587
GCA_013330515.1	ASM1333051v1	Scaffold	1.36884
GCA_013330535.1	ASM1333053v1	Scaffold	1.4469
GCA_013330715.1	ASM1333071v1	Scaffold	1.45487
GCA_013330915.1	ASM1333091v1	Scaffold	1.34782
GCA_013330985.1	ASM1333098v1	Scaffold	0.894474
GCA_013331015.1	ASM1333101v1	Scaffold	2.18175
GCA_013331025.1	ASM1333102v1	Scaffold	1.67428
GCA_013331215.1	ASM1333121v1	Scaffold	2.15467
[truncated: 3,390 more rows]

## Sheet: All Thaumarchaeota taxa
Assembly Accession	Assembly Name	Assembly Level	Genome size (Mb)
GCA_000018465.1	ASM1846v1	Complete Genome	1.64526
GCA_000200715.1	ASM20071v1	Chromosome	2.04509
GCA_000204585.1	ASM20458v1	Chromosome	1.77272
GCA_000220175.2	ASM22017v1	Contig	1.6077
GCA_000241145.2	ASM24114v2	Contig	1.85556
GCA_000242875.3	ASM24287v3	Contig	1.57296
GCA_000270325.1	ASM27032v1	Complete Genome	1.68094
GCA_000299365.1	ASM29936v1	Complete Genome	1.63996
GCA_000299395.1	ASM29939v1	Complete Genome	1.69091
GCA_000303155.1	ASM30315v1	Complete Genome	2.83387
GCA_000328925.1	NAR	Contig	3.44157
GCA_000328945.1	NSJ	Contig	1.65082
GCA_000349625.1	GATC	Contig	0.529171
GCA_000380685.1	ASM38068v1	Contig	0.62462
GCA_000398485.1	ASM39848v1	Contig	0.525966
GCA_000398505.1	ASM39850v1	Contig	0.640245
GCA_000398525.1	ASM39852v1	Contig	0.249792
GCA_000398545.1	ASM39854v1	Contig	0.252228
GCA_000398565.1	ASM39856v1	Contig	0.412511
GCA_000398585.1	ASM39858v1	Contig	0.198883
GCA_000402075.1	ASM40207v1	Contig	1.10444
GCA_000402915.1	ASM40291v1	Contig	0.667371
GCA_000402965.1	ASM40296v1	Contig	0.703726
GCA_000405685.1	ASM40568v1	Contig	1.08532
GCA_000405745.1	ASM40574v1	Contig	0.29149
GCA_000405765.1	ASM40576v1	Contig	0.373687
GCA_000405905.1	ASM40590v1	Contig	0.741841
GCA_000405925.1	ASM40592v1	Contig	0.164795
GCA_000494125.1	Aigarchaeota archaeon OTU 4	Contig	0.617045
GCA_000494145.1	Aigarchaeota archaeon OTU 1	Contig	1.18034
GCA_000494165.1	Aigarchaeota archaeon OTU 2	Contig	0.654645
GCA_000494185.1	Aigarchaeota archaeon OTU 3	Contig	0.688171
GCA_000685395.1	NKMY2	Contig	1.76297
GCA_000698785.1	ASM69878v1	Complete Genome	2.52794
GCA_000722915.1	ASM72291v1	Scaffold	1.29672
GCA_000723185.1	APF_1883_PRJEB4650	Contig	1.63613
GCA_000724145.1	ASM72414v1	Scaffold	1.41532
GCA_000730285.1	ASM73028v1	Complete Genome	2.95437
GCA_000746685.1	ASM74668v1	Scaffold	1.08105
GCA_000746695.1	ASM74669v1	Contig	0.435918
GCA_000746705.1	ASM74670v1	Scaffold	0.522768
GCA_000746745.1	ASM74674v1	Contig	1.85193
GCA_000746765.1	ASM74676v1	Contig	1.36064
GCA_000746785.1	ASM74678v1	Scaffold	1.00395
GCA_000802205.2	ASM80220v2	Complete Genome	3.43071
GCA_000812185.1	ASM81218v1	Complete Genome	1.23213
GCA_000875775.1	ASM87577v1	Complete Genome	1.71308
GCA_000955905.3	ASM95590v3	Complete Genome	1.62016
GCA_000956175.1	ASM95617v1	Complete Genome	1.80309
GCA_001321845.1	ASM132184v1	Contig	0.609612
GCA_001437625.1	ASM143762v1	Contig	1.27039
GCA_001438895.1	ASM143889v1	Contig	0.740497
GCA_001443365.1	ASM144336v1	Scaffold	1.35843
GCA_001510225.1	ASM151022v1	Contig	1.041
GCA_001510255.1	ASM151025v1	Contig	0.084873
GCA_001510275.1	ASM151027v1	Contig	1.22116
GCA_001510295.1	ASM151029v1	Contig	0.661324
GCA_001541925.1	ASM154192v1	Contig	1.38362
GCA_001543015.1	ASM154301v1	Contig	1.92518
GCA_001626095.1	ASM162609v1	Scaffold	0.57679
GCA_001627015.1	ASM162701v1	Scaffold	0.980468
GCA_001627055.1	ASM162705v1	Scaffold	1.50782
GCA_001627075.1	ASM162707v1	Scaffold	0.892063
GCA_001627095.1	ASM162709v1	Contig	0.870512
GCA_001627105.1	ASM162710v1	Scaffold	1.50737
GCA_001627165.1	ASM162716v1	Scaffold	0.449408
GCA_001627235.1	ASM162723v1	Scaffold	1.00913
GCA_001674955.1	ASM167495v1	Scaffold	1.75395
GCA_001830115.1	ASM183011v1	Scaffold	1.38893
GCA_001870125.1	ASM187012v1	Complete Genome	2.98978
GCA_001914355.1	ASM191435v1	Contig	1.27819
GCA_001917505.1	ASM191750v1	Scaffold	1.20857
GCA_001917865.1	ASM191786v1	Scaffold	0.776466
GCA_001917965.1	ASM191796v1	Scaffold	1.17144
GCA_001917995.1	ASM191799v1	Scaffold	1.38058
GCA_001918455.1	ASM191845v1	Scaffold	1.44623
GCA_001918475.1	ASM191847v1	Scaffold	1.45103
GCA_001918945.1	ASM191894v1	Scaffold	0.935896
GCA_001918975.1	ASM191897v1	Scaffold	0.791146
GCA_001918995.1	ASM191899v1	Contig	0.548217
GCA_001919295.1	ASM191929v1	Scaffold	0.825498
GCA_001920395.1	ASM192039v1	Scaffold	1.0555
GCA_001920405.1	ASM192040v1	Scaffold	0.420678
GCA_001920445.1	ASM192044v1	Contig	0.368693
GCA_002156965.1	ASM215696v1	Complete Genome	1.36008
GCA_002255105.1	ASM225510v1	Contig	0.871166
GCA_002317795.1	ASM231779v1	Contig	1.90674
GCA_002317805.1	ASM231780v1	Contig	1.00372
GCA_002317825.1	ASM231782v1	Contig	0.931996
GCA_002494485.1	ASM249448v1	Scaffold	1.23505
GCA_002494565.1	ASM249456v1	Scaffold	0.613362
GCA_002494895.1	ASM249489v1	Contig	1.5929
GCA_002494985.1	ASM249498v1	Scaffold	1.10097
GCA_002495135.1	ASM249513v1	Scaffold	1.18092
GCA_002495205.1	ASM249520v1	Scaffold	0.80833
GCA_002495315.1	ASM249531v1	Scaffold	1.68888
GCA_002495575.1	ASM249557v1	Scaffold	1.24448
GCA_002495905.1	ASM249590v1	Scaffold	0.852867
GCA_002495965.1	ASM249596v1	Scaffold	0.832637
GCA_002496625.1	ASM249662v1	Scaffold	0.940486
GCA_002498045.1	ASM249804v1	Scaffold	0.92068
GCA_002498105.1	ASM249810v1	Scaffold	0.985626
GCA_002498345.1	ASM249834v1	Scaffold	3.14496
GCA_002499005.1	ASM249900v1	Contig	1.18752
GCA_002499525.1	ASM249952v1	Scaffold	1.01147
GCA_002501845.1	ASM250184v1	Scaffold	1.13516
GCA_002501855.1	ASM250185v1	Scaffold	3.08138
GCA_002501935.1	ASM250193v1	Scaffold	3.04797
GCA_002504425.1	ASM250442v1	Scaffold	2.95423
GCA_002505305.1	ASM250530v1	Scaffold	0.766188
GCA_002506605.1	ASM250660v1	Scaffold	0.854732
GCA_002506665.1	ASM250666v1	Scaffold	1.38973
GCA_002508305.1	ASM250830v1	Scaffold	0.832406
GCA_002508395.1	ASM250839v1	Scaffold	1.26623
GCA_002508435.1	ASM250843v1	Scaffold	1.02581
GCA_002690335.1	ASM269033v1	Contig	0.995367
GCA_002690535.1	ASM269053v1	Contig	0.945636
GCA_002693165.1	ASM269316v1	Contig	0.921724
GCA_002698885.1	ASM269888v1	Contig	0.746133
GCA_002709285.1	ASM270928v1	Contig	0.625023
GCA_002710505.1	ASM271050v1	Contig	0.624436
GCA_002713205.1	ASM271320v1	Contig	0.919096
GCA_002713325.1	ASM271332v1	Contig	1.45968
GCA_002717165.1	ASM271716v1	Contig	0.6997
GCA_002724795.1	ASM272479v1	Contig	0.545893
GCA_002730325.1	ASM273032v1	Contig	1.13115
GCA_002731165.1	ASM273116v1	Contig	0.604421
GCA_002737445.1	ASM273744v1	Contig	1.19376
GCA_002737455.1	ASM273745v1	Contig	1.13999
GCA_002762965.1	ASM276296v1	Scaffold	1.2025
GCA_002763195.1	ASM276319v1	Scaffold	0.992785
GCA_002781805.1	ASM278180v1	Scaffold	1.01975
GCA_002783425.1	ASM278342v1	Scaffold	1.09129
GCA_002784675.1	ASM278467v1	Scaffold	1.64555
GCA_002787055.1	ASM278705v1	Complete Genome	1.69721
GCA_002788515.1	ASM278851v1	Scaffold	1.37449
GCA_002789395.1	ASM278939v1	Scaffold	1.6366
GCA_002878195.1	ASM287819v1	Contig	0.645547
GCA_002906215.1	ASM290621v1	Complete Genome	1.61739
GCA_003045125.1	CN25urea_metaspades	Contig	1.24554
GCA_003056285.1	ASM305628v1	Contig	1.53639
GCA_003135575.1	20111000_P3M	Scaffold	2.34336
GCA_003139715.1	20110800_S3D	Scaffold	2.33209
GCA_003164815.1	20120700_S1D	Scaffold	2.84239
GCA_003175215.1	ASM317521v1	Contig	1.75781
GCA_003176995.1	ASM317699v1	Scaffold	3.96945
GCA_003193945.1	ASM319394v1	Contig	1.48569
GCA_003193985.1	ASM319398v1	Contig	0.533557
GCA_003228335.1	ASM322833v1	Contig	0.720312
GCA_003229255.1	ASM322925v1	Contig	1.2027
GCA_003248015.1	ASM324801v1	Contig	0.681765
GCA_003251855.1	ASM325185v1	Contig	0.395528
GCA_003331425.1	ASM333142v1	Contig	1.23531
GCA_003569705.1	ASM356970v1	Contig	1.46251
GCA_003660635.1	ASM366063v1	Contig	1.22603
GCA_003660665.1	ASM366066v1	Contig	1.19767
GCA_003660685.1	ASM366068v1	Contig	0.752598
GCA_003660695.1	ASM366069v1	Contig	1.16465
GCA_003660725.1	ASM366072v1	Contig	0.789519
GCA_003660745.1	ASM366074v1	Contig	1.68477
GCA_003660755.1	ASM366075v1	Contig	1.19213
GCA_003660785.1	ASM366078v1	Contig	0.664088
GCA_003660805.1	ASM366080v1	Contig	0.842471
GCA_003695185.1	ASM369518v1	Contig	1.11174
GCA_003702465.1	ASM370246v1	Scaffold	1.12783
GCA_003702485.1	ASM370248v1	Scaffold	0.924268
GCA_003702495.1	ASM370249v1	Scaffold	1.26676
GCA_003702525.1	ASM370252v1	Contig	1.27962
GCA_003702545.1	ASM370254v1	Scaffold	1.22405
GCA_003702585.1	ASM370258v1	Scaffold	0.534624
GCA_003724175.1	ASM372417v1	Scaffold	1.22612
GCA_003724215.1	ASM372421v1	Scaffold	1.18161
GCA_003724235.1	ASM372423v1	Contig	1.18507
GCA_003724255.1	ASM372425v1	Contig	1.30615
GCA_003724275.1	ASM372427v1	Contig	1.37007
GCA_003724285.1	ASM372428v1	Contig	1.17637
GCA_003724325.1	ASM372432v1	Contig	1.17111
GCA_003820555.1	ASM382055v1	Contig	2.67884
GCA_003856905.1	ASM385690v1	Contig	1.70816
GCA_003972945.1	ASM397294v1	Contig	0.564807
GCA_004195415.1	ASM419541v1	Contig	2.99291
GCA_004195455.1	ASM419545v1	Contig	1.08378
GCA_004297665.1	ASM429766v1	Contig	1.55082
GCA_004322445.1	ASM432244v1	Contig	1.52638
GCA_004322465.1	ASM432246v1	Contig	1.68102
GCA_004525345.1	ASM452534v1	Contig	0.798641
GCA_005776525.1	ASM577652v1	Contig	1.21271
GCA_005778305.1	ASM577830v1	Contig	1.25684
GCA_005787795.1	ASM578779v1	Contig	0.609743
GCA_005787845.1	ASM578784v1	Contig	1.03808
GCA_005789035.1	ASM578903v1	Contig	0.672927
GCA_005790655.1	ASM579065v1	Contig	1.43595
GCA_005790695.1	ASM579069v1	Contig	1.12035
GCA_005798385.1	ASM579838v1	Contig	1.18556
GCA_005798405.1	ASM579840v1	Contig	1.24707
GCA_005798995.1	ASM579899v1	Contig	0.581484
GCA_005799035.1	ASM579903v1	Contig	1.11875
GCA_005800015.1	ASM580001v1	Contig	0.550174
GCA_005877075.1	ASM587707v1	Scaffold	1.96684
GCA_005877085.1	ASM587708v1	Scaffold	1.04144
GCA_005877095.1	ASM587709v1	Scaffold	1.39861
GCA_005877105.1	ASM587710v1	Scaffold	1.99632
GCA_005877115.1	ASM587711v1	Scaffold	1.44305
GCA_005877175.1	ASM587717v1	Scaffold	1.15276
GCA_005877185.1	ASM587718v1	Scaffold	1.86169
GCA_005877195.1	ASM587719v1	Scaffold	1.8218
GCA_005877205.1	ASM587720v1	Scaffold	1.56235
GCA_005877225.1	ASM587722v1	Scaffold	2.00112
GCA_005877275.1	ASM587727v1	Scaffold	1.07998
GCA_005877295.1	ASM587729v1	Scaffold	1.4129
GCA_005877305.1	ASM587730v1	Scaffold	1.32958
GCA_005877315.1	ASM587731v1	Scaffold	1.19649
GCA_005877345.1	ASM587734v1	Scaffold	2.20209
GCA_005877365.1	ASM587736v1	Scaffold	1.79224
GCA_005877385.1	ASM587738v1	Scaffold	2.17427
GCA_005877395.1	ASM587739v1	Scaffold	1.55948
GCA_005877425.1	ASM587742v1	Scaffold	1.87684
GCA_005877455.1	ASM587745v1	Scaffold	1.73821
GCA_005877475.1	ASM587747v1	Scaffold	1.48614
GCA_005877765.1	ASM587776v1	Scaffold	2.16273
GCA_005887815.1	ASM588781v1	Scaffold	1.88128
GCA_006740685.1	ASM674068v1	Complete Genome	1.49962
GCA_007279895.1	ASM727989v1	Contig	0.590897
GCA_007280335.1	ASM728033v1	Contig	1.29637
GCA_007280465.1	ASM728046v1	Contig	0.916573
GCA_007570915.1	ASM757091v1	Contig	1.31618
GCA_007571005.1	ASM757100v1	Contig	1.09436
GCA_007571135.1	ASM757113v1	Contig	1.46804
GCA_007571225.1	ASM757122v1	Contig	1.28841
GCA_007826885.1	ASM782688v1	Scaffold	2.64486
GCA_008080815.1	ASM808081v1	Contig	1.06693
GCA_008080855.1	ASM808085v1	Contig	1.36623
GCA_008389435.1	ASM838943v1	Scaffold	3.2245
GCA_009377575.1	ASM937757v1	Scaffold	3.89007
GCA_009379865.1	ASM937986v1	Scaffold	3.06028
GCA_009665115.1	ASM966511v1	Contig	2.53897
GCA_009665125.1	ASM966512v1	Contig	1.92582
GCA_009665175.1	ASM966517v1	Contig	1.4425
GCA_009694705.1	ASM969470v1	Contig	1.0418
GCA_009697445.1	ASM969744v1	Contig	0.95717
GCA_009697485.1	ASM969748v1	Contig	0.716049
GCA_009836545.1	ASM983654v1	Scaffold	1.39238
GCA_009837245.1	ASM983724v1	Scaffold	1.45375
GCA_009837825.1	ASM983782v1	Scaffold	1.36977
GCA_009838485.1	ASM983848v1	Scaffold	0.907549
GCA_009839185.1	ASM983918v1	Scaffold	1.50588
GCA_009840065.1	ASM984006v1	Scaffold	1.57381
GCA_009841175.1	ASM984117v1	Scaffold	1.60047
GCA_009841735.1	ASM984173v1	Scaffold	1.41627
GCA_009842575.1	ASM984257v1	Scaffold	1.53435
GCA_009843815.1	ASM984381v1	Scaffold	1.6103
GCA_009844325.1	ASM984432v1	Scaffold	1.21019
GCA_009844685.1	ASM984468v1	Scaffold	1.25682
GCA_009846455.1	ASM984645v1	Scaffold	1.60328
GCA_009861625.1	ASM986162v1	Scaffold	3.21669
GCA_009889515.1	ASM988951v1	Contig	2.11276
GCA_009898475.1	ASM989847v1	Scaffold	2.34426
GCA_009903775.1	ASM990377v1	Contig	1.45138
GCA_009903795.1	ASM990379v1	Contig	1.36473
GCA_009937485.1	ASM993748v1	Contig	1.26061
GCA_010028325.1	ASM1002832v1	Contig	1.53086
GCA_010028385.1	ASM1002838v1	Contig	1.63622
GCA_010028425.1	ASM1002842v1	Contig	1.61997
GCA_010028435.1	ASM1002843v1	Contig	1.61859
GCA_010028465.1	ASM1002846v1	Contig	1.61021
GCA_010028485.1	ASM1002848v1	Contig	1.59571
GCA_010028495.1	ASM1002849v1	Contig	1.63318
GCA_010030375.1	ASM1003037v1	Contig	1.60913
GCA_010030425.1	ASM1003042v1	Contig	1.6214
GCA_010030475.1	ASM1003047v1	Contig	1.60746
GCA_010030505.1	ASM1003050v1	Contig	1.68093
GCA_010030525.1	ASM1003052v1	Contig	1.33471
GCA_011039345.1	ASM1103934v1	Contig	0.791224
GCA_011039455.1	ASM1103945v1	Contig	0.913215
GCA_011039465.1	ASM1103946v1	Contig	0.388115
GCA_011039675.1	ASM1103967v1	Contig	0.979455
GCA_011042515.1	ASM1104251v1	Contig	1.07293
GCA_011048385.1	ASM1104838v1	Contig	0.914759
GCA_011055585.1	ASM1105558v1	Contig	1.44772
GCA_011058825.1	ASM1105882v1	Contig	1.57346
GCA_011319465.1	ASM1131946v1	Contig	1.54019
GCA_011319475.1	ASM1131947v1	Scaffold	1.82454
GCA_011523285.1	ASM1152328v1	Scaffold	0.826649
GCA_011605715.1	ASM1160571v1	Contig	1.77667
GCA_011605725.1	ASM1160572v1	Contig	2.22758
GCA_011605775.1	ASM1160577v1	Contig	1.62357
GCA_011771385.1	ASM1177138v1	Scaffold	1.37039
GCA_011771765.1	ASM1177176v1	Scaffold	2.02262
GCA_011772365.1	ASM1177236v1	Scaffold	2.03164
GCA_011772925.1	ASM1177292v1	Scaffold	1.47456
GCA_011773125.1	ASM1177312v1	Scaffold	0.984039
GCA_011773305.1	ASM1177330v1	Scaffold	2.04358
GCA_011773785.1	ASM1177378v1	Scaffold	1.37039
GCA_011774125.1	ASM1177412v1	Scaffold	2.57931
GCA_011774755.1	ASM1177475v1	Scaffold	1.47833
GCA_011775845.1	ASM1177584v1	Scaffold	2.65852
GCA_011776245.1	ASM1177624v1	Scaffold	2.07456
GCA_011777025.1	ASM1177702v1	Scaffold	2.57931
GCA_012030845.1	ASM1203084v1	Contig	0.73296
GCA_012271085.1	ASM1227108v1	Scaffold	1.70887
GCA_012271275.1	ASM1227127v1	Scaffold	2.03305
GCA_012928565.1	ASM1292856v1	Contig	1.07498
GCA_012928585.1	ASM1292858v1	Scaffold	1.58485
GCA_012928605.1	ASM1292860v1	Contig	1.28987
GCA_012928615.1	ASM1292861v1	Contig	0.415216
GCA_012959225.1	ASM1295922v1	Scaffold	0.920938
GCA_012961065.1	ASM1296106v1	Scaffold	0.832393
GCA_012962645.1	ASM1296264v1	Contig	1.09483
GCA_012963215.1	ASM1296321v1	Contig	0.766341
GCA_012963855.1	ASM1296385v1	Scaffold	0.664958
GCA_012964965.1	ASM1296496v1	Scaffold	0.715243
GCA_012965845.1	ASM1296584v1	Scaffold	0.582125
GCA_012965865.1	ASM1296586v1	Scaffold	0.830007
GCA_013002265.1	ASM1300226v1	Contig	1.48777
GCA_013043295.1	ASM1304329v1	Contig	1.16784
GCA_013043305.1	ASM1304330v1	Contig	0.813197
GCA_013043365.1	ASM1304336v1	Contig	1.3682
GCA_013043625.1	ASM1304362v1	Contig	1.15976
GCA_013043885.1	ASM1304388v1	Contig	0.871294
GCA_013114705.1	ASM1311470v1	Contig	2.44531
GCA_013114715.1	ASM1311471v1	Contig	1.81537
GCA_013114725.1	ASM1311472v1	Contig	1.90883
GCA_013139085.1	ASM1313908v1	Contig	0.81844
GCA_013140415.1	ASM1314041v1	Contig	1.21344
GCA_013203245.1	ASM1320324v1	Contig	1.452
GCA_013215285.1	ASM1321528v1	Scaffold	1.66492
GCA_013215365.1	ASM1321536v1	Contig	0.769486
GCA_013287585.1	ASM1328758v1	Scaffold	1.35455
GCA_013287935.1	ASM1328793v1	Scaffold	0.956536
GCA_013288055.1	ASM1328805v1	Scaffold	0.751702
GCA_013288145.1	ASM1328814v1	Scaffold	2.56676
GCA_013288545.1	ASM1328854v1	Scaffold	1.38568
GCA_013289235.1	ASM1328923v1	Scaffold	1.004
GCA_013306035.1	ASM1330603v1	Contig	0.837806
GCA_013306055.1	ASM1330605v1	Contig	0.81482
GCA_013306075.1	ASM1330607v1	Contig	0.697485
GCA_013306115.1	ASM1330611v1	Contig	0.670792
GCA_013306135.1	ASM1330613v1	Scaffold	0.812057
GCA_013329365.1	ASM1332936v1	Scaffold	0.956928
GCA_013329425.1	ASM1332942v1	Scaffold	0.934909
GCA_013329465.1	ASM1332946v1	Scaffold	1.09007
GCA_013330055.1	ASM1333005v1	Scaffold	1.18417
GCA_013330565.1	ASM1333056v1	Scaffold	0.959641
GCA_013330645.1	ASM1333064v1	Scaffold	0.922306
GCA_013331435.1	ASM1333143v1	Scaffold	0.859987
GCA_013340765.1	NAS2_1.0	Complete Genome	1.5939
GCA_013378375.1	ASM1337837v1	Contig	0.918577
GCA_013378385.1	ASM1337838v1	Contig	0.996535
GCA_013388925.1	ASM1338892v1	Contig	1.28293
GCA_013388945.1	ASM1338894v1	Contig	1.99393
GCA_013390365.1	ASM1339036v1	Scaffold	0.883129
GCA_013390375.1	ASM1339037v1	Scaffold	1.05049
GCA_013390385.1	ASM1339038v1	Contig	1.42472
GCA_013390395.1	ASM1339039v1	Contig	1.27334
GCA_013390405.1	ASM1339040v1	Scaffold	1.36488
GCA_013390475.1	ASM1339047v1	Contig	1.52269
GCA_013390485.1	ASM1339048v1	Contig	1.20287
GCA_013390495.1	ASM1339049v1	Contig	0.819148
GCA_013390745.1	ASM1339074v1	Contig	1.0752
GCA_013390755.1	ASM1339075v1	Scaffold	1.00938
GCA_013390765.1	ASM1339076v1	Contig	0.884242
GCA_013390775.1	ASM1339077v1	Scaffold	1.27911
GCA_013390785.1	ASM1339078v1	Contig	0.94932
GCA_013390845.1	ASM1339084v1	Scaffold	1.13495
GCA_013390855.1	ASM1339085v1	Contig	1.1764
GCA_013390865.1	ASM1339086v1	Scaffold	1.26801
GCA_013390875.1	ASM1339087v1	Contig	1.19623
GCA_013390905.1	ASM1339090v1	Scaffold	1.22871
GCA_013407145.1	ASM1340714v1	Complete Genome	1.56336
GCA_013407165.1	ASM1340716v1	Complete Genome	1.58511
GCA_013407185.1	ASM1340718v1	Complete Genome	2.17142
GCA_013407275.1	ASM1340727v1	Complete Genome	1.83483
GCA_013407385.1	ASM1340738v1	Complete Genome	1.72073
GCA_013521055.1	2018-04-13	Contig	1.22397
GCA_013538675.1	ASM1353867v1	Scaffold	1.24049
GCA_013538695.1	ASM1353869v1	Scaffold	1.45303
GCA_013538705.1	ASM1353870v1	Contig	1.45234
GCA_013538715.1	ASM1353871v1	Contig	1.45829
GCA_013538755.1	ASM1353875v1	Scaffold	1.09495
GCA_013538775.1	ASM1353877v1	Scaffold	0.662951
GCA_013538795.1	ASM1353879v1	Scaffold	1.58767
GCA_013538805.1	ASM1353880v1	Scaffold	1.45427
GCA_013694585.1	ASM1369458v1	Contig	2.11671
GCA_013811745.1	ASM1381174v1	Contig	2.86796
GCA_013815875.1	ASM1381587v1	Scaffold	1.64952
GCA_013821245.1	ASM1382124v1	Scaffold	2.28024
GCA_013867185.1	ASM1386718v1	Scaffold	0.888144
GCA_013867205.1	ASM1386720v1	Scaffold	1.27777
GCA_013867235.1	ASM1386723v1	Scaffold	1.29771
GCA_013867245.1	ASM1386724v1	Scaffold	1.14648
GCA_013867275.1	ASM1386727v1	Scaffold	0.866454
GCA_013867285.1	ASM1386728v1	Contig	1.40661
GCA_013867305.1	ASM1386730v1	Scaffold	1.25693
GCA_013867335.1	ASM1386733v1	Scaffold	1.46073
GCA_013867345.1	ASM1386734v1	Scaffold	1.32718
GCA_013911135.1	ASM1391113v1	Contig	1.70984
GCA_014066365.1	ASM1406636v1	Contig	1.33232
GCA_014075315.1	ASM1407531v1	Chromosome	1.92221
GCA_014078525.1	ASM1407852v1	Scaffold	1.78907
GCA_014078535.1	ASM1407853v1	Scaffold	1.61756
GCA_014078545.1	ASM1407854v1	Scaffold	1.79297
GCA_014193235.1	ASM1419323v1	Scaffold	1.34983
GCA_014237995.1	ASM1423799v1	Contig	0.664523
GCA_014238105.1	ASM1423810v1	Scaffold	0.747926
GCA_014238635.1	ASM1423863v1	Contig	1.29646
GCA_014239085.1	ASM1423908v1	Contig	1.05612
GCA_014239905.1	ASM1423990v1	Contig	0.713647
GCA_014240125.1	ASM1424012v1	Contig	0.602505
GCA_014361085.1	ASM1436108v1	Scaffold	1.82475
GCA_014381285.1	ASM1438128v1	Scaffold	1.88823
GCA_014384145.1	ASM1438414v1	Scaffold	0.956613
GCA_014384445.1	ASM1438444v1	Scaffold	1.32496
GCA_014384555.1	ASM1438455v1	Scaffold	1.39026
GCA_014523485.1	ASM1452348v1	Contig	2.35631
GCA_014523495.1	ASM1452349v1	Contig	1.67563
GCA_014523515.1	ASM1452351v1	Contig	2.683
GCA_014523525.1	ASM1452352v1	Contig	1.95088
GCA_014523545.1	ASM1452354v1	Contig	3.18363
GCA_014523585.1	ASM1452358v1	Contig	3.5154
GCA_014523595.1	ASM1452359v1	Contig	1.19871
GCA_014523605.1	ASM1452360v1	Contig	1.98711
GCA_014523625.1	ASM1452362v1	Contig	2.73803
GCA_014523665.1	ASM1452366v1	Contig	4.89599
GCA_014523685.1	ASM1452368v1	Contig	1.88319
GCA_014523695.1	ASM1452369v1	Contig	3.88461
GCA_014533965.1	ASM1453396v1	Scaffold	1.5937
GCA_014534515.1	ASM1453451v1	Contig	1.91303
GCA_014874415.1	ASM1487441v1	Contig	1.68894
GCA_015520365.1	ASM1552036v1	Contig	0.815889
GCA_015520375.1	ASM1552037v1	Contig	1.14822
GCA_015520425.1	ASM1552042v1	Contig	1.8002
GCA_015520465.1	ASM1552046v1	Contig	1.17603
GCA_015522085.1	ASM1552208v1	Contig	1.09963
GCA_015522695.1	ASM1552269v1	Contig	1.30781
GCA_015658665.1	ASM1565866v1	Contig	0.794822
GCA_015661775.1	ASM1566177v1	Contig	1.48753
GCA_015663475.1	ASM1566347v1	Contig	0.691606
GCA_015663895.1	ASM1566389v1	Contig	0.790177
GCA_016106165.1	ASM1610616v1	Contig	1.25952
GCA_016106185.1	ASM1610618v1	Contig	1.20607
GCA_016125975.1	ASM1612597v1	Contig	1.79157
GCA_016126025.1	ASM1612602v1	Contig	1.85971
GCA_016176745.1	ASM1617674v1	Contig	1.12169
GCA_016178405.1	ASM1617840v1	Contig	1.68433
GCA_016180375.1	ASM1618037v1	Scaffold	1.43664
GCA_016180385.1	ASM1618038v1	Scaffold	0.921343
GCA_016181505.1	ASM1618150v1	Scaffold	0.896087
GCA_016184315.1	ASM1618431v1	Scaffold	2.01589
GCA_016186065.1	ASM1618606v1	Scaffold	1.40606
GCA_016186075.1	ASM1618607v1	Scaffold	0.931464
GCA_016190055.1	ASM1619005v1	Contig	2.21484
GCA_016192155.1	ASM1619215v1	Contig	1.11668
GCA_016193005.1	ASM1619300v1	Scaffold	1.69996
GCA_016197125.1	ASM1619712v1	Scaffold	0.91417
GCA_016197145.1	ASM1619714v1	Contig	0.721752
GCA_016200025.1	ASM1620002v1	Contig	1.04195
GCA_016200035.1	ASM1620003v1	Contig	1.20125
GCA_016200045.1	ASM1620004v1	Contig	1.54216
GCA_016201435.1	ASM1620143v1	Contig	1.83582
GCA_016201515.1	ASM1620151v1	Contig	1.45725
GCA_016203595.1	ASM1620359v1	Contig	0.878357
GCA_016206275.1	ASM1620627v1	Contig	1.39031
GCA_016215415.1	ASM1621541v1	Contig	0.583245
GCA_016215465.1	ASM1621546v1	Contig	1.69963
GCA_016219935.1	ASM1621993v1	Contig	1.21972
GCA_016223285.1	ASM1622328v1	Scaffold	1.45858
GCA_016234975.1	ASM1623497v1	Scaffold	1.21834
GCA_016276965.1	ASM1627696v1	Scaffold	1.174
GCA_016782145.1	ASM1678214v1	Scaffold	2.41225
GCA_016782195.1	ASM1678219v1	Scaffold	3.34452
GCA_016782225.1	ASM1678222v1	Scaffold	2.62286
GCA_016782245.1	ASM1678224v1	Scaffold	2.60711
GCA_016782265.1	ASM1678226v1	Scaffold	1.97958
GCA_016782285.1	ASM1678228v1	Scaffold	2.15765
GCA_016782305.1	ASM1678230v1	Scaffold	2.40855
GCA_016782315.1	ASM1678231v1	Scaffold	2.5025
GCA_016784625.1	ASM1678462v1	Contig	1.01479
GCA_016784665.1	ASM1678466v1	Contig	1.28685
GCA_016784685.1	ASM1678468v1	Contig	0.925875
GCA_016838725.1	ASM1683872v1	Scaffold	0.610368
GCA_016838745.1	ASM1683874v1	Scaffold	0.69798
GCA_016838765.1	ASM1683876v1	Contig	1.0409
GCA_016838785.1	ASM1683878v1	Scaffold	1.06951
GCA_016838795.1	ASM1683879v1	Contig	1.19668
GCA_016838825.1	ASM1683882v1	Scaffold	1.1219
GCA_016838845.1	ASM1683884v1	Contig	1.52142
GCA_016838865.1	ASM1683886v1	Scaffold	0.936365
GCA_016844465.1	ASM1684446v1	Scaffold	1.55708
GCA_016844685.1	ASM1684468v1	Scaffold	1.33336
GCA_016845255.1	ASM1684525v1	Contig	0.724609
GCA_016871955.1	JGI 2017-08-21	Contig	0.660113
GCA_016871975.1	JGI 2017-08-21	Contig	1.08714
GCA_016871995.1	JGI 2017-08-21	Contig	1.54644
GCA_016872015.1	JGI 2017-08-21	Contig	1.30611
GCA_016872035.1	JGI 2017-08-21	Contig	1.15451
GCA_016872055.1	JGI 2017-08-21	Contig	1.23575
GCA_016880535.1	ASM1688053v1	Contig	0.827553
GCA_016880675.1	ASM1688067v1	Contig	1.59826
GCA_017113085.1	ASM1711308v1	Contig	0.25061
GCA_017610265.1	ASM1761026v1	Contig	1.27969
GCA_017855915.1	ASM1785591v1	Contig	1.28504
GCA_018128925.1	ASM1812892v1	Complete Genome	1.64591
GCA_018263495.1	ASM1826349v1	Contig	0.824127
GCA_018263505.1	ASM1826350v1	Contig	1.37478
GCA_018333495.1	ASM1833349v1	Contig	1.80719
GCA_018334095.1	ASM1833409v1	Contig	1.6832
GCA_018646185.1	ASM1864618v1	Contig	0.748719
GCA_018646225.1	ASM1864622v1	Contig	0.8417
GCA_018646285.1	ASM1864628v1	Contig	0.868033
GCA_018647405.1	ASM1864740v1	Contig	1.09708
GCA_018648785.1	ASM1864878v1	Scaffold	1.1632
GCA_018649105.1	ASM1864910v1	Contig	0.818201
GCA_018649845.1	ASM1864984v1	Contig	0.828454
GCA_018650315.1	ASM1865031v1	Contig	1.13615
GCA_018651205.1	ASM1865120v1	Contig	0.743464
GCA_018651685.1	ASM1865168v1	Contig	1.15023
GCA_018652445.1	ASM1865244v1	Contig	2.41205
GCA_018652765.1	ASM1865276v1	Contig	0.889489
GCA_018653745.1	ASM1865374v1	Contig	0.777662
GCA_018654855.1	ASM1865485v1	Contig	1.03224
GCA_018655005.1	ASM1865500v1	Contig	1.04233
GCA_018655135.1	ASM1865513v1	Contig	0.683388
GCA_018656365.1	ASM1865636v1	Contig	0.921428
GCA_018657375.1	ASM1865737v1	Contig	0.959454
GCA_018657465.1	ASM1865746v1	Contig	0.830603
GCA_018657705.1	ASM1865770v1	Contig	1.09056
GCA_018658785.1	ASM1865878v1	Contig	1.04116
GCA_018659065.1	ASM1865906v1	Contig	0.731049
GCA_018659865.1	ASM1865986v1	Contig	1.05297
GCA_018661305.1	ASM1866130v1	Contig	1.26156
GCA_018661625.1	ASM1866162v1	Contig	1.05477
GCA_018661905.1	ASM1866190v1	Contig	0.996782
GCA_018661975.1	ASM1866197v1	Contig	1.07723
GCA_018667715.1	ASM1866771v1	Contig	1.07938
GCA_018668215.1	ASM1866821v1	Contig	0.916025
GCA_018668425.1	ASM1866842v1	Contig	1.26733
GCA_018669025.1	ASM1866902v1	Contig	1.025
GCA_018669145.1	ASM1866914v1	Contig	1.08682
GCA_018669595.1	ASM1866959v1	Contig	0.959185
GCA_018671875.1	ASM1867187v1	Contig	1.11172
GCA_018674605.1	ASM1867460v1	Contig	0.79237
GCA_018674995.1	ASM1867499v1	Contig	1.10552
GCA_018676395.1	ASM1867639v1	Contig	0.811566
GCA_018680225.1	ASM1868022v1	Contig	1.16784
GCA_018680295.1	ASM1868029v1	Contig	0.813197
GCA_018680455.1	ASM1868045v1	Contig	1.20426
GCA_018691945.1	ASM1869194v1	Contig	1.01
GCA_018695895.1	ASM1869589v1	Contig	0.858842
GCA_018696375.1	ASM1869637v1	Contig	0.852569
GCA_018697615.1	ASM1869761v1	Contig	1.58726
GCA_018697895.1	ASM1869789v1	Contig	0.910386
GCA_018698115.1	ASM1869811v1	Contig	1.07127
GCA_018700295.1	ASM1870029v1	Contig	1.02415
GCA_019241055.1	ASM1924105v1	Contig	2.57267
GCA_019246625.1	ASM1924662v1	Contig	3.96134
GCA_019653635.1	ASM1965363v1	Contig	0.268528
GCA_019653875.1	ASM1965387v1	Contig	0.276566
GCA_019654575.1	ASM1965457v1	Contig	1.10542
GCA_020027255.1	ASM2002725v1	Contig	0.752422
GCA_020027325.1	ASM2002732v1	Contig	1.24558
GCA_020027365.1	ASM2002736v1	Contig	0.888949
GCA_020028255.1	ASM2002825v1	Contig	1.84177
GCA_020028315.1	ASM2002831v1	Contig	1.45678
GCA_020028355.1	ASM2002835v1	Contig	1.53529
GCA_020028975.1	ASM2002897v1	Contig	1.91029
GCA_020029015.1	ASM2002901v1	Contig	1.66143
GCA_020029035.1	ASM2002903v1	Contig	1.50135
GCA_020029045.1	ASM2002904v1	Contig	1.67777
GCA_020029075.1	ASM2002907v1	Contig	1.52064
GCA_020029095.1	ASM2002909v1	Contig	1.27856
GCA_020029115.1	ASM2002911v1	Contig	2.0532
GCA_020029125.1	ASM2002912v1	Contig	1.75354
GCA_020029155.1	ASM2002915v1	Contig	1.89198
GCA_020029175.1	ASM2002917v1	Scaffold	1.62129
GCA_020029195.1	ASM2002919v1	Contig	1.89722
GCA_020029245.1	ASM2002924v1	Contig	1.92102
GCA_020053155.1	ASM2005315v1	Contig	1.06437
GCA_020057285.1	ASM2005728v1	Contig	0.469668
GCA_020216645.1	ASM2021664v1	Contig	0.837479
GCA_020431985.1	ASM2043198v1	Contig	1.81847
GCA_020431995.1	ASM2043199v1	Scaffold	1.73143
GCA_020432025.1	ASM2043202v1	Scaffold	1.49705
GCA_020627995.1	ASM2062799v1	Scaffold	1.17236
GCA_020697165.1	ASM2069716v1	Scaffold	2.26093
GCA_020725315.1	ASM2072531v1	Scaffold	1.87685
GCA_020833125.1	ASM2083312v1	Contig	1.46446
GCA_021155845.1	ASM2115584v1	Contig	2.11263
GCA_021157985.1	ASM2115798v1	Contig	0.810631
GCA_021159365.1	ASM2115936v1	Contig	1.24937
GCA_021160205.1	ASM2116020v1	Contig	0.793905
GCA_021160445.1	ASM2116044v1	Contig	0.923971
GCA_021161585.1	ASM2116158v1	Contig	0.76879
GCA_021162385.1	ASM2116238v1	Contig	0.884521
GCA_021162925.1	ASM2116292v1	Contig	0.837897
GCA_021163375.1	ASM2116337v1	Contig	1.39005
GCA_021163925.1	ASM2116392v1	Contig	1.09549
GCA_021268345.1	ASM2126834v1	Scaffold	1.21821
GCA_021268355.1	ASM2126835v1	Contig	1.34353
GCA_021295115.1	ASM2129511v1	Contig	0.777672
GCA_021296145.1	ASM2129614v1	Scaffold	2.28187
GCA_021296165.1	ASM2129616v1	Scaffold	1.6944
GCA_021296175.1	ASM2129617v1	Scaffold	1.78487
GCA_021323375.2	ASM2132337v2	Contig	1.27797
GCA_021323705.1	ASM2132370v1	Contig	1.84022
GCA_021324115.1	ASM2132411v1	Contig	2.13882
GCA_021324715.1	ASM2132471v1	Contig	1.92661
GCA_021325075.1	ASM2132507v1	Contig	1.58056
GCA_021325255.1	ASM2132525v1	Contig	4.16882
GCA_021325295.1	ASM2132529v1	Contig	2.69182
GCA_021325595.1	ASM2132559v1	Contig	1.63766
GCA_021325615.1	ASM2132561v1	Contig	1.83032
GCA_021414105.1	ASM2141410v1	Contig	1.28809
GCA_021414365.1	ASM2141436v1	Contig	1.87506
GCA_021650775.1	ASM2165077v1	Contig	1.47012
GCA_021731725.1	ASM2173172v1	Scaffold	0.907931
GCA_021767905.1	ASM2176790v1	Contig	0.508258
GCA_021864495.1	ASM2186449v1	Scaffold	1.51177
GCA_022117465.1	ASM2211746v1	Contig	1.18954
GCA_022426055.1	ASM2242605v1	Contig	0.872856
GCA_022426345.1	ASM2242634v1	Contig	0.662927
GCA_022428065.1	ASM2242806v1	Contig	0.677388
GCA_022449245.1	ASM2244924v1	Contig	0.861128
GCA_022449325.1	ASM2244932v1	Scaffold	0.75386
GCA_022449365.1	ASM2244936v1	Contig	0.982384
GCA_022450565.1	ASM2245056v1	Scaffold	1.09875
GCA_022450745.1	ASM2245074v1	Scaffold	1.05735
GCA_022451545.1	ASM2245154v1	Scaffold	0.973331
GCA_022451795.1	ASM2245179v1	Contig	0.939394
GCA_022452065.1	ASM2245206v1	Scaffold	1.43717
GCA_022545335.1	ASM2254533v1	Contig	1.10382
GCA_022545345.1	ASM2254534v1	Scaffold	0.761755
GCA_022545805.1	ASM2254580v1	Contig	1.13557
GCA_022545855.1	ASM2254585v1	Contig	0.985225
GCA_022545875.1	ASM2254587v1	Contig	1.70545
GCA_022545895.1	ASM2254589v1	Contig	2.56519
GCA_022545915.1	ASM2254591v1	Contig	2.5738
GCA_022545935.1	ASM2254593v1	Contig	1.37701
GCA_022561135.1	ASM2256113v1	Scaffold	1.83099
GCA_022561815.1	ASM2256181v1	Scaffold	1.96944
GCA_022562615.1	ASM2256261v1	Scaffold	1.54469
GCA_022563695.1	ASM2256369v1	Scaffold	0.836605
GCA_022564175.1	ASM2256417v1	Scaffold	0.965025
GCA_022564385.1	ASM2256438v1	Scaffold	1.47972
GCA_022564515.1	ASM2256451v1	Scaffold	1.50687
GCA_022564815.1	ASM2256481v1	Scaffold	0.777589
GCA_022565935.1	ASM2256593v1	Contig	1.12563
GCA_022567895.1	ASM2256789v1	Scaffold	1.20565
GCA_022571195.1	ASM2257119v1	Scaffold	1.38352
GCA_022572285.1	ASM2257228v1	Scaffold	1.58106
GCA_022572565.1	ASM2257256v1	Scaffold	1.8561
GCA_022572765.1	ASM2257276v1	Scaffold	1.62146
GCA_022573065.1	ASM2257306v1	Scaffold	0.940307
GCA_022573335.1	ASM2257333v1	Scaffold	0.826854
GCA_022573365.1	ASM2257336v1	Contig	0.699232
GCA_022573895.1	ASM2257389v1	Scaffold	1.80468
GCA_022574355.1	ASM2257435v1	Scaffold	1.09831
GCA_022574415.1	ASM2257441v1	Scaffold	1.34049
GCA_022615665.1	ASM2261566v1	Contig	6.90564
GCA_022758935.1	ASM2275893v1	Contig	1.60774
GCA_022759205.1	ASM2275920v1	Scaffold	0.711881
GCA_022820085.1	ASM2282008v1	Contig	1.48382
GCA_022823825.1	ASM2282382v1	Contig	1.6966
GCA_022833265.1	ASM2283326v1	Contig	1.29855
GCA_022833285.1	ASM2283328v1	Contig	1.22132
GCA_022866985.1	ASM2286698v1	Contig	2.09427
GCA_022969015.1	ASM2296901v1	Scaffold	1.65911
GCA_023250005.1	ASM2325000v1	Scaffold	1.905
GCA_023250235.1	ASM2325023v1	Scaffold	2.50152
GCA_023250455.1	ASM2325045v1	Scaffold	0.878524
GCA_023250695.1	ASM2325069v1	Scaffold	0.829513
GCA_023250885.1	ASM2325088v1	Scaffold	1.4916
GCA_023251115.1	ASM2325111v1	Scaffold	1.80037
GCA_023251295.1	ASM2325129v1	Scaffold	0.952912
GCA_023251565.1	ASM2325156v1	Scaffold	0.862508
GCA_023251795.1	ASM2325179v1	Scaffold	1.70892
GCA_023252015.1	ASM2325201v1	Scaffold	1.2258
GCA_023252235.1	ASM2325223v1	Scaffold	0.713357
GCA_023252335.1	ASM2325233v1	Contig	1.55292
GCA_023252345.1	ASM2325234v1	Contig	1.17811
GCA_023252375.1	ASM2325237v1	Scaffold	1.21922
GCA_023252395.1	ASM2325239v1	Contig	1.10919
GCA_023252415.1	ASM2325241v1	Contig	1.00352
GCA_023252435.1	ASM2325243v1	Scaffold	1.07655
GCA_023252445.1	ASM2325244v1	Scaffold	1.07612
GCA_023252475.1	ASM2325247v1	Scaffold	1.3473
GCA_023252495.1	ASM2325249v1	Contig	1.13814
GCA_023252515.1	ASM2325251v1	Scaffold	1.07876
GCA_023252525.1	ASM2325252v1	Scaffold	1.41484
GCA_023252555.1	ASM2325255v1	Scaffold	1.42675
GCA_023252575.1	ASM2325257v1	Contig	1.33076
GCA_023252595.1	ASM2325259v1	Scaffold	1.07952
GCA_023252615.1	ASM2325261v1	Contig	1.23024
GCA_023252635.1	ASM2325263v1	Scaffold	1.24206
GCA_023252655.1	ASM2325265v1	Scaffold	1.48726
GCA_023252675.1	ASM2325267v1	Scaffold	1.19575
GCA_023252695.1	ASM2325269v1	Contig	1.24451
GCA_023252705.1	ASM2325270v1	Scaffold	1.18121
GCA_023252735.1	ASM2325273v1	Scaffold	1.1583
GCA_023252755.1	ASM2325275v1	Contig	1.28315
GCA_023252765.1	ASM2325276v1	Scaffold	1.21157
GCA_023252795.1	ASM2325279v1	Contig	1.5161
GCA_023252815.1	ASM2325281v1	Contig	1.25704
GCA_023252835.1	ASM2325283v1	Scaffold	1.18844
GCA_023252855.1	ASM2325285v1	Scaffold	1.37645
GCA_023252875.1	ASM2325287v1	Scaffold	1.48007
GCA_023252885.1	ASM2325288v1	Contig	1.63846
GCA_023252915.1	ASM2325291v1	Contig	1.41201
GCA_023252925.1	ASM2325292v1	Scaffold	1.36129
GCA_023252955.1	ASM2325295v1	Contig	1.53211
GCA_023254095.1	ASM2325409v1	Scaffold	1.60925
GCA_023254335.1	ASM2325433v1	Contig	0.858709
GCA_023256075.1	ASM2325607v1	Scaffold	1.22928
GCA_023256095.1	ASM2325609v1	Scaffold	1.17934
GCA_023256355.1	ASM2325635v1	Scaffold	1.19479
GCA_023256385.1	ASM2325638v1	Scaffold	0.560281
GCA_023256405.1	ASM2325640v1	Scaffold	0.626496
GCA_023261815.1	ASM2326181v1	Scaffold	1.18067
GCA_023261845.1	ASM2326184v1	Contig	1.22192
GCA_023261865.1	ASM2326186v1	Scaffold	1.08707
GCA_023264875.1	ASM2326487v1	Scaffold	1.32928
GCA_023265135.1	ASM2326513v1	Scaffold	1.81619
GCA_023265295.1	ASM2326529v1	Scaffold	0.70135
GCA_023265715.1	ASM2326571v1	Scaffold	1.59207
GCA_023266955.1	ASM2326695v1	Scaffold	1.66816
GCA_023267835.1	ASM2326783v1	Scaffold	1.14098
GCA_023267855.1	ASM2326785v1	Scaffold	1.43901
GCA_023267875.1	ASM2326787v1	Contig	1.47334
GCA_023267885.1	ASM2326788v1	Scaffold	1.27374
GCA_023267915.1	ASM2326791v1	Scaffold	1.08869
GCA_023267925.1	ASM2326792v1	Scaffold	1.49902
GCA_023267955.1	ASM2326795v1	Scaffold	1.59977
GCA_023267975.1	ASM2326797v1	Scaffold	1.29874
GCA_023267995.1	ASM2326799v1	Scaffold	0.990328
GCA_023268015.1	ASM2326801v1	Scaffold	1.48996
GCA_023268025.1	ASM2326802v1	Scaffold	1.2489
GCA_023268055.1	ASM2326805v1	Contig	1.58964
GCA_023268075.1	ASM2326807v1	Scaffold	1.54332
GCA_023268095.1	ASM2326809v1	Scaffold	1.2089
GCA_023268105.1	ASM2326810v1	Scaffold	1.32297
GCA_023268135.1	ASM2326813v1	Scaffold	1.48256
GCA_023268155.1	ASM2326815v1	Contig	1.69741
GCA_023268165.1	ASM2326816v1	Scaffold	1.6078
GCA_023268175.1	ASM2326817v1	Scaffold	1.56857
GCA_023268205.1	ASM2326820v1	Contig	1.47334
GCA_023268235.1	ASM2326823v1	Scaffold	1.17667
GCA_023268255.1	ASM2326825v1	Contig	1.23024
GCA_023268265.1	ASM2326826v1	Scaffold	1.08869
GCA_023268295.1	ASM2326829v1	Contig	1.23859
GCA_023268335.1	ASM2326833v1	Scaffold	1.12021
GCA_023268355.1	ASM2326835v1	Contig	1.25204
GCA_023268365.1	ASM2326836v1	Contig	1.55848
GCA_023268395.1	ASM2326839v1	Scaffold	1.09433
GCA_023268735.1	ASM2326873v1	Scaffold	1.11745
GCA_023268765.1	ASM2326876v1	Contig	0.930456
GCA_023269855.1	ASM2326985v1	Scaffold	1.64221
GCA_023379805.1	ASM2337980v1	Contig	2.34178
GCA_023381155.1	ASM2338115v1	Scaffold	1.16288
GCA_023381215.1	ASM2338121v1	Scaffold	0.891692
GCA_023381255.1	ASM2338125v1	Scaffold	1.28061
GCA_023381855.1	ASM2338185v1	Scaffold	2.16127
GCA_023475365.1	ASM2347536v1	Scaffold	2.15056
GCA_023481325.1	ASM2348132v1	Scaffold	2.58433
GCA_023484575.1	ASM2348457v1	Scaffold	1.03968
GCA_023539395.1	ASM2353939v1	Contig	1.53052
GCA_023539405.1	ASM2353940v1	Contig	1.1116
GCA_023539435.1	ASM2353943v1	Contig	1.27553
GCA_023539445.1	ASM2353944v1	Contig	1.15883
GCA_023539475.1	ASM2353947v1	Contig	1.60011
GCA_023539485.1	ASM2353948v1	Contig	1.10481
GCA_023539495.1	ASM2353949v1	Contig	1.31574
GCA_023539525.1	ASM2353952v1	Contig	1.16106
GCA_023539555.1	ASM2353955v1	Contig	1.94114
GCA_023539565.1	ASM2353956v1	Contig	1.10377
GCA_023539585.1	ASM2353958v1	Contig	1.53202
GCA_023539595.1	ASM2353959v1	Contig	1.98584
GCA_023539635.1	ASM2353963v1	Contig	1.11479
GCA_023539655.1	ASM2353965v1	Contig	1.07337
GCA_023539675.1	ASM2353967v1	Contig	1.55772
GCA_023644045.1	ASM2364404v1	Contig	3.21026
GCA_023644255.1	ASM2364425v1	Contig	1.97363
GCA_023644355.1	ASM2364435v1	Contig	3.11326
GCA_023700305.1	ASM2370030v1	Contig	0.988157
GCA_024256165.1	ASM2425616v1	Contig	1.33904
GCA_024256185.1	ASM2425618v1	Contig	1.35995
GCA_024256205.1	ASM2425620v1	Contig	1.05917
GCA_024256245.1	ASM2425624v1	Contig	1.3631
GCA_024274735.1	ASM2427473v1	Contig	1.18037
GCA_024640265.1	ASM2464026v1	Scaffold	1.043
GCA_024644105.1	ASM2464410v1	Scaffold	1.28905
GCA_024644385.1	ASM2464438v1	Scaffold	1.55787
GCA_024760425.1	ASM2476042v1	Complete Genome	2.52134
GCA_024860875.1	ASM2486087v1	Contig	1.6701
GCA_024860905.1	ASM2486090v1	Scaffold	1.42186
GCA_024959475.1	ASM2495947v1	Contig	0.592254
GCA_024959605.1	ASM2495960v1	Contig	1.15981
GCA_025054515.1	ASM2505451v1	Scaffold	1.54494
GCA_025054565.1	ASM2505456v1	Scaffold	0.958671
GCA_025054795.1	ASM2505479v1	Contig	1.35025
GCA_025054855.1	ASM2505485v1	Scaffold	1.56284
GCA_025058055.1	ASM2505805v1	Contig	1.16949
GCA_025058175.1	ASM2505817v1	Scaffold	0.933057
GCA_025058225.1	ASM2505822v1	Contig	1.17036
GCA_025058425.1	ASM2505842v1	Scaffold	1.27874
GCA_025058435.1	ASM2505843v1	Contig	0.65246
GCA_025058515.1	ASM2505851v1	Contig	1.46666
GCA_025058815.1	ASM2505881v1	Contig	0.591493
GCA_025058825.1	ASM2505882v1	Scaffold	1.48515
GCA_025059205.1	ASM2505920v1	Scaffold	1.18897
GCA_025059355.1	ASM2505935v1	Contig	0.938689
GCA_025059415.1	ASM2505941v1	Scaffold	0.985681
GCA_025059555.1	ASM2505955v1	Contig	1.41149
GCA_025059595.1	ASM2505959v1	Contig	1.41446
GCA_025059745.1	ASM2505974v1	Contig	1.16643
GCA_025244945.1	ASM2524494v1	Complete Genome	2.52232
GCA_025350175.1	ASM2535017v1	Contig	1.48371
GCA_025449485.1	ASM2544948v1	Contig	1.49178
GCA_025449515.1	ASM2544951v1	Contig	2.06663
GCA_025449675.1	ASM2544967v1	Contig	1.74048
GCA_025450475.1	ASM2545047v1	Contig	1.01928
GCA_025450535.1	ASM2545053v1	Contig	0.970273
GCA_025450995.1	ASM2545099v1	Contig	1.21203
GCA_025451075.1	ASM2545107v1	Contig	1.65833
GCA_025451315.1	ASM2545131v1	Contig	4.0391
GCA_025451665.1	ASM2545166v1	Contig	1.55315
GCA_025698765.1	ASM2569876v1	Contig	1.6503
GCA_025698845.1	ASM2569884v1	Contig	1.8514
GCA_025698945.1	ASM2569894v1	Contig	1.74948
GCA_025699025.1	ASM2569902v1	Contig	1.70568
GCA_025699065.1	ASM2569906v1	Contig	1.5981
GCA_025699075.1	ASM2569907v1	Contig	1.4365
GCA_025699125.1	ASM2569912v1	Contig	1.85425
GCA_025699255.1	ASM2569925v1	Contig	1.64937
GCA_025922695.1	ASM2592269v1	Contig	1.96033
GCA_025922715.1	ASM2592271v1	Contig	1.8149
GCA_025922735.1	ASM2592273v1	Contig	1.64601
GCA_025922755.1	ASM2592275v1	Contig	1.59792
GCA_025922775.1	ASM2592277v1	Contig	2.14644
GCA_025922975.1	ASM2592297v1	Contig	2.01009
GCA_025923375.1	ASM2592337v1	Contig	1.23624
GCA_025923415.1	ASM2592341v1	Contig	2.0279
GCA_025923435.1	ASM2592343v1	Contig	1.93365
GCA_025923455.1	ASM2592345v1	Contig	1.93121
GCA_025923475.1	ASM2592347v1	Contig	1.93412
GCA_025923495.1	ASM2592349v1	Contig	1.97048
GCA_025923515.1	ASM2592351v1	Contig	1.96612
GCA_025923535.1	ASM2592353v1	Contig	1.49914
GCA_025923555.1	ASM2592355v1	Contig	1.34592
GCA_025923575.1	ASM2592357v1	Contig	1.84029
GCA_025923595.1	ASM2592359v1	Contig	1.90469
GCA_025923615.1	ASM2592361v1	Contig	1.93033
GCA_025923635.1	ASM2592363v1	Contig	1.70457
GCA_025923655.1	ASM2592365v1	Contig	1.80317
GCA_025923675.1	ASM2592367v1	Contig	1.991
GCA_025923695.1	ASM2592369v1	Contig	1.38412
GCA_025923715.1	ASM2592371v1	Contig	2.02077
GCA_025923735.1	ASM2592373v1	Contig	1.96547
GCA_025923755.1	ASM2592375v1	Contig	1.94687
GCA_025923775.1	ASM2592377v1	Contig	2.04739
GCA_025923795.1	ASM2592379v1	Contig	1.96944
GCA_025923815.1	ASM2592381v1	Contig	1.08123
GCA_025923835.1	ASM2592383v1	Contig	1.5888
GCA_025923855.1	ASM2592385v1	Contig	2.6204
GCA_025923915.1	ASM2592391v1	Contig	1.36307
GCA_025924135.1	ASM2592413v1	Contig	2.32471
GCA_025924355.1	ASM2592435v1	Contig	0.991503
GCA_025924895.1	ASM2592489v1	Contig	2.42438
GCA_025924915.1	ASM2592491v1	Contig	1.79768
GCA_025924935.1	ASM2592493v1	Contig	1.93132
GCA_025924955.1	ASM2592495v1	Contig	2.62025
GCA_025929095.1	ASM2592909v1	Contig	2.01254
GCA_025929515.1	ASM2592951v1	Contig	1.00771
GCA_025929855.1	ASM2592985v1	Contig	1.00348
GCA_025930075.1	ASM2593007v1	Contig	1.95769
GCA_025930085.1	ASM2593008v1	Contig	0.958533
GCA_025930115.1	ASM2593011v1	Contig	1.93735
GCA_025930195.1	ASM2593019v1	Contig	2.65625
GCA_025930205.1	ASM2593020v1	Contig	1.30344
GCA_025930225.1	ASM2593022v1	Contig	1.14999
GCA_025930295.1	ASM2593029v1	Contig	2.00019
GCA_025930315.1	ASM2593031v1	Contig	1.38827
GCA_025930415.1	ASM2593041v1	Contig	2.25021
GCA_025930435.1	ASM2593043v1	Contig	1.35957
GCA_025930495.1	ASM2593049v1	Contig	1.3959
GCA_025930555.1	ASM2593055v1	Contig	1.36859
GCA_025930575.1	ASM2593057v1	Contig	2.76988
GCA_025930605.1	ASM2593060v1	Contig	1.82445
GCA_025931015.1	ASM2593101v1	Contig	2.02659
GCA_025931215.1	ASM2593121v1	Contig	1.61641
GCA_025934095.1	ASM2593409v1	Contig	0.430945
GCA_025934495.1	ASM2593449v1	Contig	3.55892
GCA_025935105.1	ASM2593510v1	Contig	3.76951
GCA_025935355.1	ASM2593535v1	Contig	1.54107
GCA_025935445.1	ASM2593544v1	Contig	1.65358
GCA_025936955.1	ASM2593695v1	Contig	2.11381
GCA_025937375.1	ASM2593737v1	Contig	1.03359
GCA_025937415.1	ASM2593741v1	Contig	1.75331
GCA_025937455.1	ASM2593745v1	Contig	1.4993
GCA_025937655.1	ASM2593765v1	Contig	0.916857
GCA_025937665.1	ASM2593766v1	Contig	2.04167
GCA_025979065.1	ASM2597906v1	Contig	1.67466
GCA_025980305.1	ASM2598030v1	Contig	1.11572
GCA_025998175.1	ASM2599817v1	Complete Genome	1.77505
GCA_026002835.1	ASM2600283v1	Scaffold	2.0324
GCA_026413695.1	ASM2641369v1	Scaffold	1.44326
GCA_026413725.1	ASM2641372v1	Scaffold	1.03419
GCA_026413815.1	ASM2641381v1	Contig	0.762958
GCA_026413845.1	ASM2641384v1	Scaffold	1.55075
GCA_026413865.1	ASM2641386v1	Scaffold	1.4514
GCA_026413895.1	ASM2641389v1	Scaffold	1.00846
GCA_026645355.1	ASM2664535v1	Contig	0.875923
GCA_026645395.1	ASM2664539v1	Contig	1.07967
GCA_026645405.1	ASM2664540v1	Contig	1.1765
GCA_026706865.1	ASM2670686v1	Scaffold	0.907468
GCA_026708305.1	ASM2670830v1	Scaffold	0.836782
GCA_026709665.1	ASM2670966v1	Scaffold	1.2519
GCA_026712925.1	ASM2671292v1	Contig	2.18688
GCA_026768455.1	ASM2676845v1	Contig	1.67746
GCA_026982095.1	ASM2698209v1	Contig	0.404015
GCA_026984615.1	ASM2698461v1	Contig	0.997237
GCA_026990475.1	ASM2699047v1	Scaffold	0.926478
GCA_026997095.1	ASM2699709v1	Scaffold	0.902423
GCA_026998005.1	ASM2699800v1	Scaffold	1.1613
GCA_026998095.1	ASM2699809v1	Scaffold	1.40707
GCA_026998895.1	ASM2699889v1	Scaffold	1.10678
GCA_026999495.1	ASM2699949v1	Scaffold	1.23595
GCA_026999505.1	ASM2699950v1	Scaffold	1.23142
GCA_026999785.1	ASM2699978v1	Scaffold	1.16135
GCA_027000765.1	ASM2700076v1	Scaffold	1.40916
GCA_027006325.1	ASM2700632v1	Scaffold	1.40536
GCA_027016515.1	ASM2701651v1	Scaffold	0.746585
GCA_027016715.1	ASM2701671v1	Scaffold	1.23016
GCA_027037395.1	ASM2703739v1	Scaffold	0.867062
GCA_027047065.1	ASM2704706v1	Scaffold	1.16999
GCA_027047855.1	ASM2704785v1	Scaffold	1.37084
GCA_027048765.1	ASM2704876v1	Scaffold	0.954546
GCA_027049195.1	ASM2704919v1	Contig	1.49398
GCA_027054035.1	ASM2705403v1	Scaffold	0.774987
GCA_027054475.1	ASM2705447v1	Scaffold	1.00938
GCA_027054595.1	ASM2705459v1	Scaffold	1.21085
GCA_027054695.1	ASM2705469v1	Scaffold	0.812021
GCA_027056315.1	ASM2705631v1	Scaffold	0.940081
GCA_027058585.1	ASM2705858v1	Scaffold	0.990453
GCA_027060065.1	ASM2706006v1	Scaffold	1.18615
GCA_027067305.1	ASM2706730v1	Scaffold	1.02356
GCA_027073155.1	ASM2707315v1	Contig	1.41054
GCA_027076855.1	ASM2707685v1	Scaffold	1.22132
GCA_027077125.1	ASM2707712v1	Scaffold	2.32299
GCA_027078275.1	ASM2707827v1	Scaffold	1.13913
GCA_027078545.1	ASM2707854v1	Contig	1.24247
GCA_027249525.1	ASM2724952v1	Contig	0.761667
GCA_027249765.1	ASM2724976v1	Contig	0.834238
GCA_027250935.1	ASM2725093v1	Contig	0.804251
GCA_027295655.1	ASM2729565v1	Contig	0.714898
GCA_027295865.1	ASM2729586v1	Contig	1.28438
GCA_027296345.1	ASM2729634v1	Contig	1.0039
GCA_027297425.1	ASM2729742v1	Contig	0.994903
GCA_027297635.1	ASM2729763v1	Contig	0.87742
GCA_027297695.1	ASM2729769v1	Contig	1.39596
GCA_027307105.1	ASM2730710v1	Scaffold	1.29884
GCA_027307185.1	ASM2730718v1	Scaffold	0.913653
GCA_027309505.1	ASM2730950v1	Scaffold	1.34445
GCA_027309515.1	ASM2730951v1	Scaffold	1.32932
GCA_027311215.1	ASM2731121v1	Contig	1.31231
GCA_027314125.1	ASM2731412v1	Scaffold	0.917869
GCA_027314135.1	ASM2731413v1	Contig	1.73009
GCA_027314685.1	ASM2731468v1	Contig	2.70393
GCA_027315025.1	ASM2731502v1	Scaffold	0.989646
GCA_027315065.1	ASM2731506v1	Scaffold	1.73707
GCA_027318085.1	ASM2731808v1	Contig	2.57425
GCA_027320055.1	ASM2732005v1	Contig	1.46667
GCA_027320145.1	ASM2732014v1	Scaffold	1.68925
GCA_027320175.1	ASM2732017v1	Contig	0.881893
GCA_027320425.1	ASM2732042v1	Contig	0.906843
GCA_027322035.1	ASM2732203v1	Contig	2.91784
GCA_027327245.1	ASM2732724v1	Scaffold	1.34805
GCA_027328475.1	ASM2732847v1	Contig	1.29994
GCA_027334805.1	ASM2733480v1	Contig	1.49267
GCA_027335305.1	ASM2733530v1	Scaffold	1.91556
GCA_027339745.1	ASM2733974v1	Scaffold	0.761939
GCA_027340795.1	ASM2734079v1	Contig	1.94071
GCA_027344765.1	ASM2734476v1	Contig	1.91239
GCA_027347505.1	ASM2734750v1	Scaffold	1.32745
GCA_027356865.1	ASM2735686v1	Scaffold	1.22153
GCA_027356945.1	ASM2735694v1	Scaffold	1.47913
GCA_027357545.1	ASM2735754v1	Contig	1.42197
GCA_027372185.1	ASM2737218v1	Contig	1.40412
GCA_027385895.1	ASM2738589v1	Contig	1.16183
GCA_027385935.1	ASM2738593v1	Contig	1.92842
GCA_027385945.1	ASM2738594v1	Scaffold	1.29768
GCA_027385975.1	ASM2738597v1	Scaffold	1.02877
GCA_027385995.1	ASM2738599v1	Scaffold	1.11113
GCA_027386015.1	ASM2738601v1	Scaffold	1.65799
GCA_027386025.1	ASM2738602v1	Contig	1.29498
GCA_027386055.1	ASM2738605v1	Contig	0.88281
GCA_027386075.1	ASM2738607v1	Scaffold	1.40269
GCA_027386095.1	ASM2738609v1	Contig	0.797337
GCA_027386115.1	ASM2738611v1	Contig	0.990923
GCA_027386135.1	ASM2738613v1	Scaffold	1.12444
GCA_027386155.1	ASM2738615v1	Scaffold	1.47623
GCA_027386175.1	ASM2738617v1	Contig	1.3879
GCA_027386195.1	ASM2738619v1	Scaffold	0.856931
GCA_027386235.1	ASM2738623v1	Scaffold	0.640319
GCA_027386255.1	ASM2738625v1	Contig	0.520154
GCA_027386265.1	ASM2738626v1	Contig	1.05134
GCA_027386275.1	ASM2738627v1	Contig	0.839798
GCA_027386315.1	ASM2738631v1	Contig	0.73295
GCA_027386325.1	ASM2738632v1	Scaffold	1.07082
GCA_027386355.1	ASM2738635v1	Scaffold	1.85207
GCA_027386375.1	ASM2738637v1	Scaffold	1.28612
GCA_027386385.1	ASM2738638v1	Scaffold	0.882075
GCA_027386415.1	ASM2738641v1	Scaffold	1.05985
GCA_027386425.1	ASM2738642v1	Scaffold	1.34363
GCA_027386455.1	ASM2738645v1	Scaffold	0.91653
GCA_027386465.1	ASM2738646v1	Contig	0.923311
GCA_027386495.1	ASM2738649v1	Scaffold	1.58558
GCA_027386515.1	ASM2738651v1	Scaffold	0.611141
GCA_027386525.1	ASM2738652v1	Scaffold	1.08063
GCA_027386555.1	ASM2738655v1	Scaffold	1.38272
GCA_027386575.1	ASM2738657v1	Scaffold	1.08533
GCA_027386595.1	ASM2738659v1	Contig	0.71141
GCA_027386615.1	ASM2738661v1	Scaffold	1.32858
GCA_027386635.1	ASM2738663v1	Scaffold	1.92733
GCA_027386655.1	ASM2738665v1	Scaffold	1.36271
GCA_027386665.1	ASM2738666v1	Scaffold	1.90112
GCA_027386715.1	ASM2738671v1	Contig	0.962433
GCA_027386735.1	ASM2738673v1	Contig	1.07381
GCA_027386755.1	ASM2738675v1	Contig	1.16609
GCA_027386775.1	ASM2738677v1	Scaffold	0.784066
GCA_027386785.1	ASM2738678v1	Contig	1.12518
GCA_027386815.1	ASM2738681v1	Contig	0.888227
GCA_027386835.1	ASM2738683v1	Contig	0.54134
GCA_027386855.1	ASM2738685v1	Contig	0.744511
GCA_027386865.1	ASM2738686v1	Scaffold	1.51791
GCA_027386895.1	ASM2738689v1	Contig	1.12924
GCA_027386905.1	ASM2738690v1	Contig	1.34432
GCA_027386925.1	ASM2738692v1	Contig	1.06454
GCA_027386955.1	ASM2738695v1	Contig	1.67833
GCA_027386975.1	ASM2738697v1	Scaffold	0.751292
GCA_027386985.1	ASM2738698v1	Scaffold	1.81887
GCA_027386995.1	ASM2738699v1	Contig	1.2266
GCA_027387035.1	ASM2738703v1	Contig	0.862981
GCA_027387055.1	ASM2738705v1	Scaffold	1.22185
GCA_027457165.1	ASM2745716v1	Scaffold	2.0265
GCA_027459085.1	ASM2745908v1	Contig	1.25779
GCA_027459145.1	ASM2745914v1	Scaffold	1.84724
GCA_027459165.1	ASM2745916v1	Contig	0.58637
GCA_027474545.1	ASM2747454v1	Contig	0.679088
GCA_027886785.1	ASM2788678v1	Contig	2.17319
GCA_027886795.1	ASM2788679v1	Contig	1.36475
GCA_027886825.1	ASM2788682v1	Contig	2.39819
GCA_027886845.1	ASM2788684v1	Contig	1.8446
GCA_027886865.1	ASM2788686v1	Scaffold	2.00767
GCA_027886885.1	ASM2788688v1	Scaffold	2.15539
GCA_027886905.1	ASM2788690v1	Scaffold	1.61181
GCA_027886925.1	ASM2788692v1	Scaffold	2.10215
GCA_027886945.1	ASM2788694v1	Contig	0.241157
GCA_027886965.1	ASM2788696v1	Contig	1.26551
GCA_027886975.1	ASM2788697v1	Contig	2.05298
GCA_027887005.1	ASM2788700v1	Contig	1.60525
GCA_027887025.1	ASM2788702v1	Contig	0.693896
GCA_027887045.1	ASM2788704v1	Contig	1.19534
GCA_027887115.1	ASM2788711v1	Contig	1.18576
GCA_028031895.1	ASM2803189v1	Contig	0.650552
GCA_028065995.1	ASM2806599v1	Scaffold	1.66423
GCA_028066025.1	ASM2806602v1	Scaffold	1.77819
GCA_028066115.1	ASM2806611v1	Scaffold	1.62583
GCA_028066175.1	ASM2806617v1	Scaffold	1.62191
GCA_028066215.1	ASM2806621v1	Scaffold	1.63972
GCA_028066225.1	ASM2806622v1	Scaffold	1.58734
GCA_028066405.1	ASM2806640v1	Scaffold	1.66599
GCA_028066415.1	ASM2806641v1	Scaffold	1.75573
GCA_028066555.1	ASM2806655v1	Scaffold	1.56021
GCA_028067175.1	ASM2806717v1	Scaffold	1.82853
GCA_028067205.1	ASM2806720v1	Scaffold	1.3567
GCA_028100265.1	ASM2810026v1	Contig	0.866128
GCA_028224505.1	ASM2822450v1	Contig	0.699383
GCA_028242535.1	ASM2824253v1	Contig	1.00719
GCA_028256085.1	AH-603-K09	Contig	0.271225
GCA_028273525.1	AH-545-N14	Contig	0.352273
GCA_028273565.1	AH-545-N15	Contig	0.303494
GCA_028273665.1	AH-545-N04	Contig	0.3933
GCA_028273885.1	ASM2827388v1	Contig	1.02589
GCA_028275605.1	ASM2827560v1	Contig	1.28021
GCA_028276565.1	ASM2827656v1	Contig	1.2228
GCA_028278985.1	ASM2827898v1	Contig	1.69094
GCA_028279545.1	ASM2827954v1	Contig	1.92361
GCA_028279625.1	ASM2827962v1	Contig	1.46736
GCA_028335865.1	ASM2833586v1	Contig	0.726794
GCA_028343215.1	ASM2834321v1	Contig	1.0595
GCA_028343435.1	ASM2834343v1	Contig	0.848647
GCA_028343495.1	ASM2834349v1	Contig	0.851462
GCA_028343825.1	ASM2834382v1	Contig	0.627087
GCA_028343855.1	ASM2834385v1	Contig	1.20413
GCA_028344155.1	ASM2834415v1	Contig	0.86345
GCA_028344575.1	ASM2834457v1	Contig	0.856542
GCA_028344775.1	ASM2834477v1	Contig	0.784639
GCA_028345095.1	ASM2834509v1	Contig	0.895247
GCA_028345195.1	ASM2834519v1	Contig	1.11662
GCA_028345295.1	ASM2834529v1	Contig	1.073
GCA_028345415.1	ASM2834541v1	Contig	0.762947
GCA_028345575.1	ASM2834557v1	Contig	1.09802
GCA_028345675.1	ASM2834567v1	Contig	1.28471
GCA_028345795.1	ASM2834579v1	Contig	0.777637
GCA_028345965.1	ASM2834596v1	Contig	1.00491
GCA_028346095.1	ASM2834609v1	Contig	0.821793
GCA_028351415.1	ASM2835141v1	Contig	1.06611
GCA_028353995.1	ASM2835399v1	Contig	1.00336
GCA_028355385.1	ASM2835538v1	Contig	1.20775
GCA_028357635.1	ASM2835763v1	Contig	1.20945
GCA_028370435.1	ASM2837043v1	Contig	0.593966
GCA_028370515.1	ASM2837051v1	Contig	0.445788
GCA_028370535.1	ASM2837053v1	Contig	0.290821
GCA_028370595.1	ASM2837059v1	Contig	0.299591
GCA_028370615.1	ASM2837061v1	Contig	0.559994
GCA_028370635.1	ASM2837063v1	Contig	0.632596
GCA_028370655.1	ASM2837065v1	Contig	0.363089
GCA_028370715.1	ASM2837071v1	Contig	0.509279
GCA_028370815.1	ASM2837081v1	Contig	0.598819
GCA_028370835.1	ASM2837083v1	Contig	0.197182
GCA_028370875.1	ASM2837087v1	Contig	0.41784
GCA_028371095.1	ASM2837109v1	Contig	0.543424
GCA_028371295.1	ASM2837129v1	Contig	0.537038
GCA_028372135.1	ASM2837213v1	Contig	0.655983
GCA_028372785.1	ASM2837278v1	Contig	0.715139
GCA_028376505.1	ASM2837650v1	Contig	0.731872
GCA_028377265.1	ASM2837726v1	Contig	0.903051
GCA_028377625.1	ASM2837762v1	Contig	0.733336
GCA_028384705.1	ASM2838470v1	Contig	0.687192
GCA_028384825.1	ASM2838482v1	Contig	0.679009
GCA_028385045.1	ASM2838504v1	Contig	0.674188
GCA_028385385.1	ASM2838538v1	Contig	0.576203
GCA_028385505.1	ASM2838550v1	Contig	0.541894
GCA_028413265.1	ASM2841326v1	Contig	0.849
GCA_028439605.1	ASM2843960v1	Contig	1.10487
GCA_028439625.1	ASM2843962v1	Contig	1.12006
GCA_028439635.1	ASM2843963v1	Contig	0.88117
GCA_028439655.1	ASM2843965v1	Contig	0.895508
GCA_028439665.1	ASM2843966v1	Contig	1.1269
GCA_028439705.1	ASM2843970v1	Contig	0.685481
GCA_028439725.1	ASM2843972v1	Contig	0.95442
GCA_028439735.1	ASM2843973v1	Contig	0.933824
GCA_028439745.1	ASM2843974v1	Contig	1.11221
GCA_028439755.1	ASM2843975v1	Contig	0.891609
GCA_028439805.1	ASM2843980v1	Scaffold	1.11595
GCA_028439825.1	ASM2843982v1	Scaffold	0.977759
GCA_028448965.1	ASM2844896v1	Contig	0.652961
GCA_028532505.1	ASM2853250v1	Contig	0.519761
GCA_028580845.1	ASM2858084v1	Scaffold	0.804482
GCA_028580875.1	ASM2858087v1	Scaffold	2.11571
GCA_900065925.1	NDEV.embl.gz	Complete Genome	1.8053
GCA_900143675.1	Candidatus Nitrosotalea sinensis Nd2 whole genome	Contig	1.59805
GCA_900167955.1	ASM90016795v1	Scaffold	1.55316
GCA_900177045.1	Candidatus Nitrosotalea koreensis CS whole genome	Chromosome	1.97259
GCA_900248165.1	Nitrosocaldus cavascurensis SCU2 chromosome	Complete Genome	1.57728
GCA_900299125.1	Unknown Thaumarchaeota AM_0615	Contig	1.55678
GCA_900620265.2	Arenicellales bacterium IbO2	Contig	2.34186
GCA_900696045.1	Nitrosocosmicus franklandus C13	Complete Genome	2.83645
GCA_902511735.1	AG-319-A01	Contig	0.757834
GCA_902512865.1	AG-319-F19	Contig	0.614746
GCA_902513905.1	AG-319-M09	Contig	0.439092
GCA_902514095.1	AG-319-N20	Contig	0.873113
GCA_902514275.1	AG-319-O22	Contig	0.88288
GCA_902552015.1	AG-365-G13	Contig	0.839885
GCA_902566725.1	AG-410-O05	Contig	0.792549
GCA_902567315.1	AG-414-B09	Contig	0.948518
GCA_902578515.1	AG-426-M08	Contig	0.690691
GCA_902588995.1	AG-439-E16	Contig	0.826747
GCA_902590655.1	AG-439-M12	Contig	0.910982
GCA_902591065.1	AG-439-O06	Contig	0.913814
GCA_902592435.1	AG-447-C19	Contig	1.09606
GCA_902606945.1	AG-464-C04	Contig	0.780896
GCA_902606965.1	AG-464-C10	Contig	0.73287
GCA_902608175.1	AG-464-N14	Contig	0.795921
GCA_902826075.1	RBC071	Scaffold	2.59472
GCA_905220655.1	NU5A1	Contig	1.81486
GCA_905478235.1	0.2_20180403_Bin_MAXBIN_045_1	Contig	0.771289
GCA_905479565.1	10_20180412_Bin_MAXBIN_028_sub_1	Contig	1.42062
GCA_905612275.1	RIS-SAG-08	Contig	0.733366
GCA_905612295.1	RIS-SAG-04	Contig	0.899665
GCA_905612425.1	RIS-SAG-22	Contig	1.05499
GCA_905612455.1	RIS-SAG-28	Contig	0.828933
GCA_905612485.1	RIS-SAG-24	Contig	0.94835
GCA_905616385.1	RIS-SAG-40	Contig	0.751332
GCA_905620485.1	RIS-SAG-57	Contig	0.608635
GCA_905620515.1	RIS-SAG-64	Contig	0.729226
GCA_933226985.1	S1130_Bin_3	Contig	0.810077
GCA_933226995.1	S100_Bin_4	Contig	2.26063
GCA_933227005.1	S89_Bin_2	Contig	1.48553
GCA_933227015.1	COA_Bin_4_1	Contig	1.55005
GCA_934833245.1	MTG232_bin.32.fa	Scaffold	2.16623
GCA_934846365.1	MTG235_bin.41.fa	Scaffold	2.15261
GCA_934859225.1	MTG236_bin.32.fa	Scaffold	1.58722
GCA_934860235.1	MTG237_bin.27.fa	Scaffold	2.04173
GCA_934869045.1	MTG243_bin.50.fa	Scaffold	2.69117
GCA_934876005.1	MTG247_bin.22.fa	Scaffold	1.8727
GCA_934876485.1	MTG240_bin.2.fa	Scaffold	2.19387
GCA_934883135.1	MTG246_bin.32.fa	Scaffold	2.17194
GCA_937141695.1	SRR2103024_bin.13_CONCOCT_v1.1_MAG	Contig	1.06539
GCA_937871445.1	SRR6158312_bin.22_CONCOCT_v1.1_MAG	Contig	1.34384
GCA_937875805.1	ERR2206785_bin.7_CONCOCT_v1.1_MAG	Contig	1.32012
GCA_937886485.1	ERR2098376_bin.97_CONCOCT_v1.1_MAG	Contig	1.19449
GCA_937889075.1	ERR2206759_bin.70_CONCOCT_v1.1_MAG	Contig	1.28648
GCA_937891695.1	ERR2206768_bin.97_CONCOCT_v1.1_MAG	Contig	1.03711
GCA_937896355.1	SRR6227243_bin.116_CONCOCT_v1.1_MAG	Contig	2.86559
GCA_937896695.1	ERR599160_bin.173_CONCOCT_v1.1_MAG	Contig	1.22381
GCA_937897875.1	SRR5821798_bin.55_CONCOCT_v1.1_MAG	Contig	1.22068
GCA_937906985.1	ERR598977_bin.54_CONCOCT_v1.1_MAG	Contig	1.03562
GCA_937912085.1	ERR599171_bin.43_CONCOCT_v1.1_MAG	Contig	1.09008
GCA_937920125.1	ERR2206759_bin.74_CONCOCT_v1.1_MAG	Contig	1.53888
GCA_937934155.1	H1_Bin_METABAT__116_1	Contig	1.35567
GCA_937934305.1	H1_Bin_METABAT__153_1_1	Contig	1.56405
GCA_938017545.1	S1_Bin_Bin_235_sub_1	Contig	1.17027
GCA_938029515.1	S1_Bin_METABAT__227_1	Contig	1.1132
GCA_938030895.1	S1_Bin_METABAT__108_1	Contig	1.37276
GCA_938038125.1	AE-03may19-124	Contig	0.990543
GCA_938038285.1	AH-03may19-143	Contig	0.981928
GCA_938049415.1	TH-08apr19-138	Contig	0.918195
GCA_938049435.1	ZE-13mar17-56	Scaffold	1.1812
GCA_938049455.1	LH-02apr19-284	Contig	1.16414
GCA_938049465.1	MaE-09apr19-316	Contig	1.01672
GCA_938049475.1	ZE-03apr19-173	Contig	0.984704
GCA_938049485.1	LH-02apr19-92	Contig	1.3712
GCA_938049495.1	ZE-13nov19-233	Contig	0.651027
GCA_938049505.1	ZH-3nov15-208	Contig	1.14308
GCA_938049515.1	TE-11nov19-227	Contig	1.0525
GCA_938049535.1	TE-jun18-47	Contig	0.757381
GCA_938049545.1	TrE-25oct19-313	Contig	0.871306
GCA_938049555.1	ZH-Jul18-69	Contig	1.09615
GCA_938049565.1	AH-24oct19-257	Contig	0.83116
GCA_938049575.1	TrE-03may19-298	Contig	1.16492
GCA_938049585.1	MaE-04nov19-358	Contig	1.0071
GCA_938049595.1	CE-oct18-153	Contig	0.649944
GCA_938049615.1	TrH-03may19-2	Contig	0.773597
GCA_938049625.1	TH-jun18-241	Contig	0.757212
GCA_938049635.1	ZH-13may13-132	Scaffold	1.16653
GCA_938049645.1	TrH-25oct19-123	Contig	0.745493
GCA_938049655.1	MaH-09apr19-106	Contig	1.00209
GCA_938049665.1	ZH-13nov19-116	Contig	1.13354
GCA_938049695.1	LH-05nov19-164	Contig	1.36478
GCA_938049705.1	MaH-04nov19-95	Contig	1.0633
GCA_938049715.1	CH-oct18-129	Contig	1.00588
GCA_938049725.1	MaH-09apr19-180	Contig	0.973505
GCA_938049735.1	TH-11nov19-233	Contig	1.01916
GCA_938049745.1	LH-05nov19-226	Contig	1.08852
GCA_938050245.1	LE-02apr19-8	Contig	1.14772
GCA_938050275.1	CH-jul18-2	Contig	1.03063
GCA_938050285.1	ZE-3nov15-84	Contig	0.98017
GCA_938050295.1	MaH-04nov19-10	Contig	1.01915
GCA_938050305.1	MaH-04nov19-232	Scaffold	0.757807
GCA_938050315.1	ZH-03apr19-17	Contig	1.16788
GCA_938050325.1	MoH-23oct19-59	Contig	0.975918
GCA_938073915.1	S2_Bin_Bin_67_1	Contig	0.751004
GCA_938091495.1	S1_Bin_METABAT__299_1	Contig	1.38633
GCA_946220885.1	loNSs8AJHL_bin.8.MAG	Contig	1.22836
GCA_946478655.1	SRR10754055_bin.7_metawrap_v1.3.0_MAG	Contig	0.716993
GCA_946478925.1	SRR10754057_bin.7_metawrap_v1.3.0_MAG	Contig	1.88977
GCA_946480575.1	SRR11092507_bin.1_metawrap_v1.3.0_MAG	Contig	1.84817
GCA_947441085.1	CE-Oct18-153	Contig	0.649944
GCA_947445375.1	CH-Jul18-2	Contig	1.03063
GCA_947446325.1	CH-Oct18-129	Contig	1.00588
GCA_947484955.1	TH-Jun18-241	Contig	0.757212
GCA_947486215.1	TE-Jun18-47	Contig	0.757381
GCA_947498725.1	ZH-15may19-245	Contig	1.14342
GCA_947503405.1	ZE-17mar17-56	Contig	1.17836
GCF_000018465.1	ASM1846v1	Complete Genome	1.64526
GCF_000200715.1	ASM20071v1	Chromosome	2.04509
GCF_000204585.1	ASM20458v1	Chromosome	1.77272
GCF_000220175.1	ASM22017v1	Contig	1.6077
GCF_000241145.1	ASM24114v2	Contig	1.85556
GCF_000242875.2	ASM24287v3	Contig	1.57296
GCF_000270325.1	ASM27032v1	Complete Genome	1.68094
GCF_000299365.1	ASM29936v1	Complete Genome	1.63996
GCF_000299395.1	ASM29939v1	Complete Genome	1.69091
GCF_000303155.1	ASM30315v1	Complete Genome	2.83387
GCF_000328925.1	NAR	Contig	3.44157
GCF_000328945.1	NSJ	Contig	1.65082
GCF_000349625.1	GATC	Contig	0.529171
GCF_000380685.1	ASM38068v1	Contig	0.62462
GCF_000398485.1	ASM39848v1	Contig	0.525966
GCF_000398505.1	ASM39850v1	Contig	0.640245
GCF_000398525.1	ASM39852v1	Contig	0.249792
GCF_000398545.1	ASM39854v1	Contig	0.252228
GCF_000398565.1	ASM39856v1	Contig	0.412511
GCF_000398585.1	ASM39858v1	Contig	0.198883
GCF_000402075.1	ASM40207v1	Contig	1.10444
GCF_000402915.1	ASM40291v1	Contig	0.667371
GCF_000402965.1	ASM40296v1	Contig	0.703726
GCF_000405685.1	ASM40568v1	Contig	1.08532
GCF_000405745.1	ASM40574v1	Contig	0.29149
GCF_000405905.1	ASM40590v1	Contig	0.741841
GCF_000405925.1	ASM40592v1	Contig	0.164795
GCF_000494125.1	Aigarchaeota archaeon OTU 4	Contig	0.617045
GCF_000494145.1	Aigarchaeota archaeon OTU 1	Contig	1.18034
GCF_000494165.1	Aigarchaeota archaeon OTU 2	Contig	0.654645
GCF_000494185.1	Aigarchaeota archaeon OTU 3	Contig	0.688171
GCF_000685395.1	NKMY2	Contig	1.76297
GCF_000698785.1	ASM69878v1	Complete Genome	2.52794
GCF_000722915.1	ASM72291v1	Scaffold	1.29672
GCF_000723185.1	APF_1883_PRJEB4650	Contig	1.63613
GCF_000724145.1	ASM72414v1	Scaffold	1.41532
GCF_000730285.1	ASM73028v1	Complete Genome	2.95437
GCF_000746685.1	ASM74668v1	Scaffold	1.08105
GCF_000746695.1	ASM74669v1	Contig	0.435918
GCF_000746705.1	ASM74670v1	Scaffold	0.522768
GCF_000746745.1	ASM74674v1	Contig	1.85193
GCF_000746765.1	ASM74676v1	Contig	1.36064
GCF_000746785.1	ASM74678v1	Scaffold	1.00395
GCF_000802205.1	ASM80220v2	Complete Genome	3.43071
GCF_000812185.1	ASM81218v1	Complete Genome	1.23213
GCF_000875775.1	ASM87577v1	Complete Genome	1.71308
GCF_000955905.1	ASM95590v3	Complete Genome	1.62016
GCF_000956175.1	ASM95617v1	Complete Genome	1.80309
GCF_001541925.1	ASM154192v1	Contig	1.38362
GCF_001870125.1	ASM187012v1	Complete Genome	2.98978
GCF_002156965.1	ASM215696v1	Complete Genome	1.36008
GCF_002787055.1	ASM278705v1	Complete Genome	1.69721
GCF_002906215.1	ASM290621v1	Complete Genome	1.61739
GCF_003045125.1	CN25urea_metaspades	Contig	1.24554
GCF_003175215.1	ASM317521v1	Contig	1.75781
GCF_006740685.1	ASM674068v1	Complete Genome	1.49962
GCF_007826885.1	ASM782688v1	Scaffold	2.64486
GCF_008389435.1	ASM838943v1	Scaffold	3.2245
GCF_009861625.1	ASM986162v1	Scaffold	3.21669
GCF_009898475.1	ASM989847v1	Scaffold	2.34426
GCF_011319465.1	ASM1131946v1	Contig	1.54019
GCF_011319475.1	ASM1131947v1	Scaffold	1.82454
GCF_013340765.1	NAS2_1.0	Complete Genome	1.5939
GCF_013390365.1	ASM1339036v1	Scaffold	0.883129
GCF_013390375.1	ASM1339037v1	Scaffold	1.05049
GCF_013390385.1	ASM1339038v1	Contig	1.42472
GCF_013390395.1	ASM1339039v1	Contig	1.27334
GCF_013390475.1	ASM1339047v1	Contig	1.52269
GCF_013390485.1	ASM1339048v1	Contig	1.20287
GCF_013390495.1	ASM1339049v1	Contig	0.819148
GCF_013390745.1	ASM1339074v1	Contig	1.0752
GCF_013390755.1	ASM1339075v1	Scaffold	1.00938
GCF_013390765.1	ASM1339076v1	Contig	0.884242
GCF_013390775.1	ASM1339077v1	Scaffold	1.27911
GCF_013390785.1	ASM1339078v1	Contig	0.94932
GCF_013390845.1	ASM1339084v1	Scaffold	1.13495
GCF_013390855.1	ASM1339085v1	Contig	1.1764
GCF_013390865.1	ASM1339086v1	Scaffold	1.26801
GCF_013390875.1	ASM1339087v1	Contig	1.19623
GCF_013390905.1	ASM1339090v1	Scaffold	1.22871
GCF_013407145.1	ASM1340714v1	Complete Genome	1.56336
GCF_013407165.1	ASM1340716v1	Complete Genome	1.58511
GCF_013407185.1	ASM1340718v1	Complete Genome	2.17142
GCF_013407275.1	ASM1340727v1	Complete Genome	1.83483
GCF_013407385.1	ASM1340738v1	Complete Genome	1.72073
GCF_014078525.1	ASM1407852v1	Scaffold	1.78907
GCF_014078535.1	ASM1407853v1	Scaffold	1.61756
GCF_014078545.1	ASM1407854v1	Scaffold	1.79297
GCF_018128925.1	ASM1812892v1	Complete Genome	1.64591
GCF_024760425.1	ASM2476042v1	Complete Genome	2.52134
GCF_025244945.1	ASM2524494v1	Complete Genome	2.52232
GCF_025998175.1	ASM2599817v1	Complete Genome	1.77505
GCF_026768455.1	ASM2676845v1	Contig	1.67746
GCF_028256085.1	AH-603-K09	Contig	0.271225
GCF_028273525.1	AH-545-N14	Contig	0.352273
GCF_028273565.1	AH-545-N15	Contig	0.303494
GCF_028273665.1	AH-545-N04	Contig	0.3933
GCF_028273885.1	ASM2827388v1	Contig	1.02589
GCF_900065925.1	NDEV.embl.gz	Complete Genome	1.8053
GCF_900143675.1	Candidatus Nitrosotalea sinensis Nd2 whole genome	Contig	1.59805
GCF_900167955.1	ASM90016795v1	Scaffold	1.55316
GCF_900177045.1	Candidatus Nitrosotalea koreensis CS whole genome	Chromosome	1.97259
GCF_900248165.1	Nitrosocaldus cavascurensis SCU2 chromosome	Complete Genome	1.57728
GCF_900696045.1	Nitrosocosmicus franklandus C13	Complete Genome	2.83645
GCF_905220655.1	NU5A1	Contig	1.81486

## Sheet: Survey taxa
Assembly Accession	Assembly Name	Assembly Level	Genome size (Mb)	Taxa
GCA_000006805.1	ASM680v1	Complete Genome	2.57101	Halobacteria
GCA_000009185.1	ASM918v1	Complete Genome	3.17936	Halobacteria
GCA_000011085.1	ASM1108v1	Complete Genome	4.27464	Halobacteria
GCA_000022205.1	ASM2220v1	Complete Genome	3.69258	Halobacteria		These survey taxa belong to all members of the class Halobacteria, Halophilic methanogenic archaea, and Nanohalobacteria in Euryarchaeota [1-10].
GCA_000023945.1	ASM2394v1	Complete Genome	3.1168	Halobacteria
GCA_000023965.1	ASM2396v1	Complete Genome	3.33235	Halobacteria		References:
GCA_000025325.1	ASM2532v1	Complete Genome	5.44078	Halobacteria
GCA_000025625.1	ASM2562v1	Complete Genome	4.44364	Halobacteria		1	Boujelben, I.; Martinez-Garcia, M.; van Pelt, J.; Maalej, S., Diversity of cultivable halophilic archaea and bacteria from superficial hypersaline sediments of Tunisian solar salterns. Antonie Van Leeuwenhoek International Journal of General and Molecular Microbiology 2014, 106 (4), 675-692.
GCA_000025685.1	ASM2568v1	Complete Genome	4.0129	Halobacteria		2	Burns, D. G.; Camakaris, H. M.; Janssen, P. H.; Dyall-Smith, A. L., Combined use of cultivation-dependent and cultivation-independent methods indicates that members of most haloarchaeal groups in an Australian crystallizer pond are cultivable. Applied and Environmental Microbiology 2004, 70 (9), 5258-5265.
GCA_000026045.1	ASM2604v1	Complete Genome	2.7497	Halobacteria		3	He, Y.; He, L.; Wang, Z.; Liang, T.; Sun, S.; Liu, X., Salinity Shapes the Microbial Communities in Surface Sediments of Salt Lakes on the Tibetan Plateau, China. Water 2022, 14 (24).
GCA_000069025.1	ASM6902v1	Complete Genome	2.66878	Halobacteria		4	Maignien, L.; Parkes, R. J.; Cragg, B.; Niemann, H.; Knittel, K.; Coulon, S.; Akhmetzhanov, A.; Boon, N., Anaerobic oxidation of methane in hypersaline cold seep sediments. Fems Microbiology Ecology 2013, 83 (1), 214-231.
GCA_000172995.2	ASM17299v2	Complete Genome	3.94447	Halobacteria		5	Mani, K.; Taib, N.; Hugoni, M.; Bronner, G.; Braganca, J. M.; Debroas, D., Transient Dynamics of Archaea and Bacteria in Sediments and Brine Across a Salinity Gradient in a Solar Saltern of Goa, India. Frontiers in Microbiology 2020, 11.
GCA_000187225.2	ASM18722v1	Contig	4.28481	Halobacteria		6	Oren, A., Taxonomy of halophilic Archaea: current status and future challenges. Extremophiles 2014, 18 (5), 825-834.
GCA_000196895.1	ASM19689v1	Complete Genome	3.69865	Halobacteria		7	Pasic, L.; Bartual, S. G.; Ulrih, N. P.; Grabnar, M.; Velikonja, B. H., Diversity of halophilic archaea in the crystallizers of an Adriatic solar saltern. Fems Microbiology Ecology 2005, 54 (3), 491-498.
GCA_000215915.3	HLRTI_V2	Contig	3.14656	Halobacteria		8	Roessler, M.; Muller, V., Osmoadaptation in bacteria and archaea: common principles and differences. Environmental Microbiology 2001, 3 (12), 743-754.
GCA_000217715.1	ASM21771v1	Complete Genome	4.35527	Halobacteria		9	Soppa, J., Evolutionary advantages of polyploidy in halophilic archaea. Biochemical Society Transactions 2013, 41, 339-343.
GCA_000223905.1	ASM22390v1	Complete Genome	3.89	Halobacteria		10	Youssef, N. H.; Ashlock-Savage, K. N.; Elshahed, M. S., Phylogenetic Diversities and Community Structure of Members of the Extremely Halophilic Archaea (Order Halobacteriales) in Multiple Saline Sediment Habitats. Applied and Environmental Microbiology 2012, 78 (5), 1332-1344.
GCA_000224475.1	ASM22447v1	Complete Genome	3.64316	Halobacteria
GCA_000226975.3	ASM22697v3	Complete Genome	4.38154	Halobacteria
GCA_000230715.3	ASM23071v3	Complete Genome	3.78836	Halobacteria
GCA_000230735.3	ASM23073v3	Complete Genome	4.3541	Halobacteria
GCA_000230955.3	ASM23095v3	Complete Genome	3.16256	Halobacteria
GCA_000237865.1	ASM23786v1	Complete Genome	3.26048	Halobacteria
GCA_000259215.1	ASM25921v1	Contig	3.38368	Halobacteria
GCA_000281695.1	ASM28169v1	Complete Genome	3.79361	Halobacteria
GCA_000283335.1	162.HSB1.1	Contig	4.49231	Halobacteria
GCA_000296615.1	ASM29661v1	Scaffold	3.16801	Halobacteria
GCA_000306765.2	ASM30676v2	Complete Genome	3.90471	Halobacteria
GCA_000328285.1	Haloferax sp. BAB2207 V.1	Contig	3.74471	Halobacteria
GCA_000328525.1	ASM32852v1	Complete Genome	3.22388	Halobacteria
GCA_000328685.1	ASM32868v1	Complete Genome	4.31412	Halobacteria
GCA_000334895.1	ASM33489v1	Contig	3.47673	Halobacteria
GCA_000336615.1	ASM33661v1	Contig	4.22542	Halobacteria
GCA_000336635.1	ASM33663v1	Contig	4.28036	Halobacteria
GCA_000336655.1	ASM33665v1	Contig	4.33858	Halobacteria
GCA_000336675.1	ASM33667v1	Contig	3.41907	Halobacteria
GCA_000336695.1	ASM33669v1	Contig	2.99156	Halobacteria
GCA_000336715.1	ASM33671v1	Contig	4.05243	Halobacteria
GCA_000336735.1	ASM33673v1	Contig	3.64926	Halobacteria
GCA_000336755.1	ASM33675v1	Contig	3.95214	Halobacteria
GCA_000336775.1	ASM33677v1	Contig	4.05732	Halobacteria
GCA_000336795.1	ASM33679v1	Contig	3.61906	Halobacteria
GCA_000336815.1	ASM33681v1	Contig	3.9988	Halobacteria
GCA_000336835.1	ASM33683v1	Contig	3.59821	Halobacteria
GCA_000336855.1	ASM33685v1	Contig	3.60953	Halobacteria
GCA_000336875.1	ASM33687v1	Contig	3.68287	Halobacteria
GCA_000336895.1	ASM33689v1	Contig	4.14711	Halobacteria
GCA_000336915.1	ASM33691v1	Contig	3.4497	Halobacteria
GCA_000336935.1	ASM33693v1	Contig	4.19978	Halobacteria
GCA_000336955.1	ASM33695v1	Contig	3.69795	Halobacteria
GCA_000336975.1	ASM33697v1	Contig	3.58703	Halobacteria
GCA_000336995.1	ASM33699v1	Contig	3.10853	Halobacteria
GCA_000337015.1	ASM33701v1	Contig	3.3826	Halobacteria
GCA_000337035.1	ASM33703v1	Contig	3.64531	Halobacteria
GCA_000337055.1	ASM33705v1	Contig	3.30737	Halobacteria
GCA_000337075.1	ASM33707v1	Contig	3.03753	Halobacteria
GCA_000337095.1	ASM33709v1	Contig	4.38452	Halobacteria
GCA_000337115.1	ASM33711v1	Contig	3.89527	Halobacteria
GCA_000337135.1	ASM33713v1	Contig	4.30927	Halobacteria
GCA_000337155.1	ASM33715v1	Contig	3.77497	Halobacteria
GCA_000337175.1	ASM33717v1	Contig	4.02369	Halobacteria
GCA_000337195.1	ASM33719v1	Contig	4.1908	Halobacteria
GCA_000337215.1	ASM33721v1	Contig	4.58863	Halobacteria
GCA_000337235.1	ASM33723v1	Contig	4.92684	Halobacteria
GCA_000337255.1	ASM33725v1	Contig	3.61412	Halobacteria
GCA_000337275.1	ASM33727v1	Contig	4.40516	Halobacteria
GCA_000337295.1	ASM33729v1	Contig	3.89454	Halobacteria
GCA_000337315.1	ASM33731v1	Contig	3.86675	Halobacteria
GCA_000337335.1	ASM33733v1	Contig	3.30613	Halobacteria
GCA_000337355.1	ASM33735v1	Contig	3.61974	Halobacteria
GCA_000337375.1	ASM33737v1	Contig	3.42504	Halobacteria
GCA_000337395.1	ASM33739v1	Contig	3.13776	Halobacteria
GCA_000337415.1	ASM33741v1	Contig	3.32886	Halobacteria
GCA_000337435.1	ASM33743v1	Contig	3.37622	Halobacteria
GCA_000337455.1	ASM33745v1	Contig	4.69489	Halobacteria
GCA_000337475.1	ASM33747v1	Contig	3.52203	Halobacteria
GCA_000337495.1	ASM33749v1	Contig	4.84161	Halobacteria
GCA_000337515.1	ASM33751v1	Contig	3.23845	Halobacteria
GCA_000337535.1	ASM33753v1	Contig	4.61836	Halobacteria
GCA_000337555.1	ASM33755v1	Contig	4.40418	Halobacteria
GCA_000337575.1	ASM33757v1	Contig	4.15961	Halobacteria
GCA_000337595.1	ASM33759v1	Contig	4.63519	Halobacteria
GCA_000337615.1	ASM33761v1	Contig	3.91581	Halobacteria
GCA_000337635.1	ASM33763v1	Contig	4.26445	Halobacteria
GCA_000337655.1	ASM33765v1	Contig	3.69403	Halobacteria
GCA_000337675.1	ASM33767v1	Contig	4.41653	Halobacteria
GCA_000337695.1	ASM33769v1	Contig	4.49618	Halobacteria
GCA_000337715.1	ASM33771v1	Contig	4.11128	Halobacteria
GCA_000337735.1	ASM33773v1	Contig	3.46029	Halobacteria
GCA_000337755.1	ASM33775v1	Contig	4.40493	Halobacteria
GCA_000337775.1	ASM33777v1	Contig	3.9232	Halobacteria
GCA_000337795.1	ASM33779v1	Contig	3.82597	Halobacteria
GCA_000337815.1	ASM33781v1	Contig	3.36898	Halobacteria
GCA_000337835.1	ASM33783v1	Contig	3.81243	Halobacteria
GCA_000337855.1	ASM33785v1	Contig	3.92851	Halobacteria
GCA_000337875.1	ASM33787v1	Contig	4.4163	Halobacteria
GCA_000337895.1	ASM33789v1	Contig	3.68875	Halobacteria
GCA_000337915.1	ASM33791v1	Contig	3.4237	Halobacteria
GCA_000376445.1	ASM37644v1	Contig	4.31754	Halobacteria
GCA_000379085.1	ASM37908v1	Scaffold	3.60777	Halobacteria
GCA_000383975.1	ASM38397v1	Scaffold	4.93484	Halobacteria
GCA_000400975.1	ASM40097v1	Contig	2.43176	Halobacteria
GCA_000403645.1	ASM40364v1	Complete Genome	3.25526	Halobacteria
GCA_000415945.1	HX64_HX5_0315125.1	Scaffold	2.04094	Halobacteria
GCA_000415965.1	J07B_scf56329a_trim	Scaffold	3.4755	Halobacteria
GCA_000415985.1	HQW2_08err_032412a	Scaffold	3.59454	Halobacteria
GCA_000416005.1	HQX_031812	Scaffold	3.01991	Halobacteria
GCA_000416025.1	HN6_031912	Scaffold	2.529	Halobacteria
GCA_000416045.1	HR_032012	Scaffold	2.1208	Halobacteria
GCA_000416065.1	HN4_v3_031612	Scaffold	2.88866	Halobacteria
GCA_000416085.1	J07ABselected	Scaffold	2.98294	Halobacteria
GCA_000416105.1	J07AB_HB67select	Scaffold	2.64955	Halobacteria
GCA_000421805.1	ASM42180v1	Contig	3.59148	Halobacteria
GCA_000427685.1	ASM42768v1	Scaffold	3.79793	Halobacteria
GCA_000447865.2	ASM44786v2	Scaffold	2.8809	Halobacteria
GCA_000455345.1	Halgo	Scaffold	3.90636	Halobacteria
GCA_000455365.1	HdjelfamassiliensisIIH2	Scaffold	3.77655	Halobacteria
GCA_000470655.1	HATI1	Complete Genome	3.14616	Halobacteria
GCA_000474235.1	ASM47423v1	Contig	2.62897	Halobacteria
GCA_000485535.1	ASM48553v1	Scaffold	3.6375	Halobacteria
GCA_000493245.1	Nat_J71	Contig	3.66762	Halobacteria
GCA_000495475.1	Htyrrel1.0	Contig	3.67509	Halobacteria
GCA_000504565.2	ASM50456v2	Complete Genome	3.9015	Halobacteria
GCA_000513435.1	HRSP_AJ67	Scaffold	4.22501	Halobacteria
GCA_000517625.1	ASM51762v1	Complete Genome	4.13118	Halobacteria
GCA_000591055.1	ASM59105v1	Complete Genome	2.91257	Halobacteria
GCA_000685635.1	ASM68563v1	Chromosome	3.9067	Halobacteria
GCA_000690595.2	ASM69059v2	Scaffold	3.79434	Halobacteria
GCA_000691505.2	ASM69150v2	Contig	3.17849	Halobacteria
GCA_000700025.2	ASM70002v2	Contig	3.28237	Halobacteria
GCA_000710605.1	HTGA29.1	Contig	4.13162	Halobacteria
GCA_000710615.1	HAPD43.1	Contig	3.92672	Halobacteria
GCA_000723845.1	PRJEB5511_assembly_1	Scaffold	3.89363	Halobacteria
GCA_000730175.1	ASM73017v1	Contig	4.2237	Halobacteria
GCA_000731985.1	ASM73198v1	Contig	3.77413	Halobacteria
GCA_000739555.1	ASM73955v1	Contig	2.955	Halobacteria
GCA_000739575.1	ASM73957v1	Contig	3.85222	Halobacteria
GCA_000739595.1	ASM73959v1	Contig	3.67798	Halobacteria
GCA_000746205.1	ASM74620v1	Scaffold	2.76746	Halobacteria
GCA_000755225.1	ASM75522v1	Contig	3.45149	Halobacteria
GCA_000755245.1	ASM75524v1	Contig	3.76437	Halobacteria
GCA_000784335.1	ASM78433v1	Scaffold	4.3509	Halobacteria
GCA_000815265.1	ASM81526v1	Contig	3.7183	Halobacteria
GCA_000815385.1	ASM81538v1	Contig	4.0915	Halobacteria
GCA_000827835.1	ASM82783v1	Complete Genome	4.22505	Halobacteria
GCA_001011115.1	ASM101111v1	Complete Genome	2.20974	Halobacteria
GCA_001190965.1	ASM119096v1	Complete Genome	3.91845	Halobacteria
GCA_001261915.1	Halorubrum SD626R	Scaffold	3.24871	Halobacteria
GCA_001280425.1	ASM128042v1	Contig	3.97099	Halobacteria
GCA_001280455.1	ASM128045v1	Contig	3.56702	Halobacteria
GCA_001282785.1	halo7	Contig	2.83586	Halobacteria
GCA_001305655.1	ASM130565v1	Complete Genome	2.2535	Halobacteria
GCA_001307315.1	Halpeg_cdk2_1	Contig	2.97254	Halobacteria
GCA_001316185.1	ASM131618v1	Contig	3.89306	Halobacteria
GCA_001368915.1	PRJEB5949_assembly_1	Scaffold	4.01518	Halobacteria
GCA_001462205.1	HalopeDYS1.0	Scaffold	3.24305	Halobacteria
GCA_001469865.1	ASM146986v1	Contig	3.83076	Halobacteria
GCA_001469875.2	ASM146987v2	Scaffold	3.90498	Halobacteria
GCA_001469955.1	ASM146995v1	Contig	3.92956	Halobacteria
GCA_001482285.1	ASM148228v1	Scaffold	3.97756	Halobacteria
GCA_001483125.1	ASM148312v1	Contig	2.9509	Halobacteria
GCA_001485535.1	ASM148553v1	Contig	3.01281	Halobacteria
GCA_001485555.1	ASM148555v1	Contig	4.18459	Halobacteria
GCA_001485575.1	ASM148557v1	Contig	4.35926	Halobacteria
GCA_001488575.1	Halobacterium hubeiense JI20-1	Complete Genome	3.13035	Halobacteria
GCA_001542905.1	ASM154290v1	Contig	3.32577	Halobacteria
GCA_001563795.1	ASM156379v1	Contig	2.36824	Halobacteria
GCA_001563805.1	ASM156380v1	Contig	2.87498	Halobacteria
GCA_001563885.1	ASM156388v1	Contig	2.00621	Halobacteria
GCA_001563955.1	ASM156395v1	Contig	1.46345	Halobacteria
GCA_001563965.1	ASM156396v1	Contig	1.27824	Halobacteria
GCA_001564005.1	ASM156400v1	Contig	1.48085	Halobacteria
GCA_001564085.1	ASM156408v1	Contig	1.27239	Halobacteria
GCA_001564115.1	ASM156411v1	Contig	2.2878	Halobacteria
GCA_001564135.1	ASM156413v1	Contig	2.09588	Halobacteria
GCA_001564175.1	ASM156417v1	Contig	1.44316	Halobacteria
GCA_001564255.1	ASM156425v1	Contig	2.1558	Halobacteria
GCA_001564275.1	ASM156427v1	Contig	3.16482	Halobacteria
GCA_001564285.1	ASM156428v1	Contig	2.33023	Halobacteria
GCA_001593955.1	ASM159395v1	Contig	3.98041	Halobacteria
GCA_001625445.1	ASM162544v1	Contig	4.89669	Halobacteria
GCA_001647155.1	ASM164715v1	Scaffold	4.3318	Halobacteria
GCA_001723155.1	ASM172315v1	Contig	5.19257	Halobacteria
GCA_001767315.1	ASM176731v1	Complete Genome	1.97228	Halobacteria
GCA_001861355.1	ASM186135v1	Contig	4.58084	Halobacteria
GCA_001886955.1	ASM188695v1	Complete Genome	2.08595	Halobacteria
GCA_001950595.1	ASM195059v1	Contig	2.57436	Halobacteria
GCA_001953745.1	ASM195374v1	Contig	3.98062	Halobacteria
GCA_001971705.1	ASM197170v1	Complete Genome	3.8358	Halobacteria
GCA_001989615.1	ASM198961v1	Complete Genome	3.77899	Halobacteria
GCA_002025255.2	ASM202525v2	Complete Genome	3.46533	Halobacteria
GCA_002114285.1	ASM211428v1	Contig	3.60355	Halobacteria
GCA_002135005.1	ASM213500v1	Scaffold	3.30813	Halobacteria
GCA_002135045.1	ASM213504v1	Scaffold	3.14599	Halobacteria
GCA_002156705.1	ASM215670v1	Complete Genome	3.93055	Halobacteria
GCA_002177135.1	ASM217713v1	Contig	3.9143	Halobacteria
GCA_002215285.1	ASM221528v1	Scaffold	3.27855	Halobacteria
GCA_002215305.1	ASM221530v1	Contig	3.63375	Halobacteria
GCA_002252725.1	ASM225272v1	Scaffold	3.70247	Halobacteria
GCA_002252735.1	ASM225273v1	Scaffold	4.64804	Halobacteria
GCA_002252745.1	ASM225274v1	Contig	2.97057	Halobacteria
GCA_002252755.1	ASM225275v1	Scaffold	3.81132	Halobacteria
GCA_002252805.1	ASM225280v1	Scaffold	3.35296	Halobacteria
GCA_002252815.1	ASM225281v1	Contig	3.34623	Halobacteria
GCA_002252835.1	ASM225283v1	Scaffold	3.54572	Halobacteria
GCA_002252865.1	ASM225286v1	Contig	2.1124	Halobacteria
GCA_002252875.1	ASM225287v1	Scaffold	3.27496	Halobacteria
GCA_002252895.1	ASM225289v1	Scaffold	3.6267	Halobacteria
GCA_002252925.1	ASM225292v1	Scaffold	3.74217	Halobacteria
GCA_002252935.1	ASM225293v1	Scaffold	2.25364	Halobacteria
GCA_002252955.1	ASM225295v1	Scaffold	4.2044	Halobacteria
GCA_002252965.1	ASM225296v1	Scaffold	3.92673	Halobacteria
GCA_002252985.1	ASM225298v1	Scaffold	3.32012	Halobacteria
GCA_002286985.1	ASM228698v1	Contig	3.50665	Halobacteria
GCA_002355635.1	ASM235563v1	Complete Genome	3.10594	Halobacteria
GCA_002355655.1	ASM235565v1	Complete Genome	3.0802	Halobacteria
GCA_002379115.1	ASM237911v1	Contig	3.66542	Halobacteria
GCA_002494345.1	ASM249434v1	Contig	4.47632	Halobacteria
GCA_002572525.1	ASM257252v1	Contig	5.05806	Halobacteria
GCA_002727095.1	ASM272709v1	Scaffold	3.8611	Halobacteria
GCA_002727105.1	ASM272710v1	Scaffold	3.32216	Halobacteria
GCA_002727125.1	ASM272712v1	Scaffold	3.57835	Halobacteria
GCA_002788215.1	ASM278821v1	Complete Genome	3.33202	Halobacteria
GCA_002844195.1	ASM284419v1	Scaffold	4.6154	Halobacteria
GCA_002844335.1	ASM284433v1	Complete Genome	3.72171	Halobacteria
GCA_002855455.1	ASM285545v1	Contig	3.69531	Halobacteria
GCA_002906575.1	ASM290657v1	Complete Genome	4.97312	Halobacteria
GCA_002952775.1	ASM295277v1	Complete Genome	3.31312	Halobacteria
GCA_003020925.1	ASM302092v1	Scaffold	2.19879	Halobacteria
GCA_003020945.1	ASM302094v1	Scaffold	2.64729	Halobacteria
GCA_003020965.1	ASM302096v1	Scaffold	2.95193	Halobacteria
GCA_003020985.1	ASM302098v1	Scaffold	2.83864	Halobacteria
GCA_003021005.1	ASM302100v1	Scaffold	2.44905	Halobacteria
GCA_003021015.1	ASM302101v1	Scaffold	2.89124	Halobacteria
GCA_003021045.1	ASM302104v1	Scaffold	2.57331	Halobacteria
GCA_003021055.1	ASM302105v1	Scaffold	1.23149	Halobacteria
GCA_003021085.1	ASM302108v1	Scaffold	3.3857	Halobacteria
GCA_003021105.1	ASM302110v1	Scaffold	2.06882	Halobacteria
GCA_003021115.1	ASM302111v1	Scaffold	1.38498	Halobacteria
GCA_003021145.1	ASM302114v1	Scaffold	2.31943	Halobacteria
GCA_003021165.1	ASM302116v1	Scaffold	1.71137	Halobacteria
GCA_003021175.1	ASM302117v1	Scaffold	2.60566	Halobacteria
GCA_003021205.1	ASM302120v1	Scaffold	1.5127	Halobacteria
GCA_003021225.1	ASM302122v1	Scaffold	2.35971	Halobacteria
GCA_003021235.1	ASM302123v1	Scaffold	3.60458	Halobacteria
GCA_003021245.1	ASM302124v1	Scaffold	1.48821	Halobacteria
GCA_003021285.1	ASM302128v1	Scaffold	1.96497	Halobacteria
GCA_003021305.1	ASM302130v1	Scaffold	2.51804	Halobacteria
GCA_003021325.1	ASM302132v1	Scaffold	1.88302	Halobacteria
GCA_003021335.1	ASM302133v1	Scaffold	1.48771	Halobacteria
GCA_003021365.1	ASM302136v1	Scaffold	2.1	Halobacteria
GCA_003021655.1	ASM302165v1	Scaffold	2.73601	Halobacteria
GCA_003021685.1	ASM302168v1	Scaffold	2.64016	Halobacteria
GCA_003021705.1	ASM302170v1	Scaffold	2.83274	Halobacteria
GCA_003021725.1	ASM302172v1	Scaffold	3.05316	Halobacteria
GCA_003021745.1	ASM302174v1	Scaffold	2.20321	Halobacteria
GCA_003021755.1	ASM302175v1	Scaffold	1.7293	Halobacteria
GCA_003021785.1	ASM302178v1	Scaffold	2.24925	Halobacteria
GCA_003021795.1	ASM302179v1	Scaffold	1.7522	Halobacteria
GCA_003021975.1	ASM302197v1	Scaffold	2.60643	Halobacteria
GCA_003022005.1	ASM302200v1	Scaffold	3.21157	Halobacteria
GCA_003022025.1	ASM302202v1	Scaffold	2.08038	Halobacteria
GCA_003022045.1	ASM302204v1	Scaffold	2.17807	Halobacteria
GCA_003022055.1	ASM302205v1	Scaffold	1.62763	Halobacteria
GCA_003022085.1	ASM302208v1	Scaffold	1.55287	Halobacteria
GCA_003022685.1	ASM302268v1	Scaffold	2.17279	Halobacteria
GCA_003022725.1	ASM302272v1	Scaffold	2.63122	Halobacteria
GCA_003022745.1	ASM302274v1	Scaffold	1.78633	Halobacteria
GCA_003022765.1	ASM302276v1	Scaffold	2.21298	Halobacteria
GCA_003022785.1	ASM302278v1	Scaffold	1.90369	Halobacteria
GCA_003022805.1	ASM302280v1	Scaffold	1.74528	Halobacteria
GCA_003022815.1	ASM302281v1	Scaffold	1.49726	Halobacteria
GCA_003022845.1	ASM302284v1	Scaffold	2.28466	Halobacteria
GCA_003022865.1	ASM302286v1	Scaffold	1.77446	Halobacteria
GCA_003022885.1	ASM302288v1	Scaffold	0.947951	Halobacteria
GCA_003022905.1	ASM302290v1	Scaffold	1.51752	Halobacteria
GCA_003022925.1	ASM302292v1	Scaffold	3.27837	Halobacteria
GCA_003022945.1	ASM302294v1	Scaffold	2.63319	Halobacteria
GCA_003023165.1	ASM302316v1	Scaffold	2.34856	Halobacteria
GCA_003023185.1	ASM302318v1	Scaffold	2.01752	Halobacteria
GCA_003023195.1	ASM302319v1	Scaffold	3.29164	Halobacteria
GCA_003023215.1	ASM302321v1	Scaffold	1.92276	Halobacteria
GCA_003023405.1	ASM302340v1	Scaffold	2.43832	Halobacteria
GCA_003023415.1	ASM302341v1	Scaffold	2.23095	Halobacteria
GCA_003023445.1	ASM302344v1	Scaffold	1.66329	Halobacteria
GCA_003023455.1	ASM302345v1	Scaffold	1.25891	Halobacteria
GCA_003023465.1	ASM302346v1	Scaffold	2.51076	Halobacteria
GCA_003023485.1	ASM302348v1	Scaffold	1.56597	Halobacteria
GCA_003023525.1	ASM302352v1	Scaffold	1.16227	Halobacteria
GCA_003023535.1	ASM302353v1	Scaffold	1.8913	Halobacteria
GCA_003023565.1	ASM302356v1	Scaffold	2.88259	Halobacteria
GCA_003023575.1	ASM302357v1	Scaffold	1.3408	Halobacteria
GCA_003023785.1	ASM302378v1	Scaffold	2.41905	Halobacteria
GCA_003058365.1	ASM305836v1	Complete Genome	2.72312	Halobacteria
GCA_003226235.1	ASM322623v1	Contig	3.34345	Halobacteria
GCA_003287355.1	ASM328735v1	Contig	3.58493	Halobacteria
GCA_003298465.1	ASM329846v1	Contig	5.60538	Halobacteria
GCA_003336245.1	ASM333624v1	Contig	3.5491	Halobacteria
GCA_003342675.1	ASM334267v1	Complete Genome	3.77364	Halobacteria
GCA_003342695.1	ASM334269v1	Complete Genome	3.52933	Halobacteria
GCA_003344565.1	ASM334456v1	Contig	4.60607	Halobacteria
GCA_003351065.1	ASM335106v1	Scaffold	3.879	Halobacteria
GCA_003369835.1	ASM336983v1	Contig	4.37218	Halobacteria
GCA_003382685.1	ASM338268v1	Scaffold	3.83832	Halobacteria
GCA_003382985.1	ASM338298v1	Contig	4.01965	Halobacteria
GCA_003383005.1	ASM338300v1	Contig	3.8842	Halobacteria
GCA_003383015.1	ASM338301v1	Contig	3.62017	Halobacteria
GCA_003383025.1	ASM338302v1	Scaffold	4.17621	Halobacteria
GCA_003383065.1	ASM338306v1	Contig	3.81356	Halobacteria
GCA_003383085.1	ASM338308v1	Contig	3.93822	Halobacteria
GCA_003383095.1	ASM338309v1	Contig	4.01208	Halobacteria
GCA_003383195.1	ASM338319v1	Contig	4.36621	Halobacteria
GCA_003430805.1	ASM343080v1	Complete Genome	3.85343	Halobacteria
GCA_003430825.1	ASM343082v1	Complete Genome	3.78932	Halobacteria
GCA_003439925.1	ASM343992v1	Contig	3.47334	Halobacteria
GCA_003551265.1	ASM355126v1	Contig	2.91184	Halobacteria
GCA_003551525.1	ASM355152v1	Contig	1.11187	Halobacteria
GCA_003551725.1	ASM355172v1	Contig	3.6767	Halobacteria
GCA_003551945.1	ASM355194v1	Contig	2.42744	Halobacteria
GCA_003552045.1	ASM355204v1	Contig	2.58936	Halobacteria
GCA_003552265.1	ASM355226v1	Contig	1.61123	Halobacteria
GCA_003552325.1	ASM355232v1	Contig	2.33338	Halobacteria
GCA_003552705.1	ASM355270v1	Contig	1.99486	Halobacteria
GCA_003552885.1	ASM355288v1	Contig	1.70044	Halobacteria
GCA_003554115.1	ASM355411v1	Contig	1.50625	Halobacteria
GCA_003554325.1	ASM355432v1	Contig	1.9906	Halobacteria
GCA_003554605.1	ASM355460v1	Contig	2.50274	Halobacteria
GCA_003554885.1	ASM355488v1	Contig	3.24107	Halobacteria
GCA_003555125.1	ASM355512v1	Contig	3.00401	Halobacteria
GCA_003557335.1	ASM355733v1	Contig	2.6776	Halobacteria
GCA_003559215.1	ASM355921v1	Contig	3.94124	Halobacteria
GCA_003586325.1	ASM358632v1	Scaffold	4.26135	Halobacteria
GCA_003602035.1	ASM360203v1	Contig	3.87336	Halobacteria
GCA_003605575.1	ASM360557v1	Scaffold	2.46839	Halobacteria
GCA_003605635.1	ASM360563v1	Contig	3.00969	Halobacteria
GCA_003610195.1	ASM361019v1	Scaffold	4.86523	Halobacteria
GCA_003634715.1	ASM363471v1	Contig	4.45915	Halobacteria
GCA_003665865.1	ASM366586v1	Contig	3.87937	Halobacteria
GCA_003665885.1	ASM366588v1	Contig	4.19145	Halobacteria
GCA_003665905.1	ASM366590v1	Contig	3.88855	Halobacteria
GCA_003665925.1	ASM366592v1	Contig	3.87139	Halobacteria
GCA_003665935.1	ASM366593v1	Contig	3.54807	Halobacteria
GCA_003665955.1	ASM366595v1	Contig	3.50679	Halobacteria
GCA_003665985.1	ASM366598v1	Contig	4.13314	Halobacteria
GCA_003666005.1	ASM366600v1	Contig	3.90935	Halobacteria
GCA_003666015.1	ASM366601v1	Contig	4.14043	Halobacteria
GCA_003666025.1	ASM366602v1	Contig	3.30715	Halobacteria
GCA_003666065.1	ASM366606v1	Contig	4.54443	Halobacteria
GCA_003670115.1	ASM367011v1	Contig	4.66568	Halobacteria
GCA_003675855.1	ASM367585v1	Contig	3.73552	Halobacteria
GCA_003675875.1	ASM367587v1	Scaffold	4.11701	Halobacteria
GCA_003688715.1	ASM368871v1	Scaffold	3.50731	Halobacteria
GCA_003697815.1	ASM369781v1	Scaffold	3.61003	Halobacteria
GCA_003697845.1	ASM369784v1	Scaffold	3.59298	Halobacteria
GCA_003721175.2	ASM372117v2	Complete Genome	3.17588	Halobacteria
GCA_003721435.2	ASM372143v2	Complete Genome	3.58228	Halobacteria
GCA_003722095.1	ASM372209v1	Contig	2.66102	Halobacteria
GCA_003730195.1	ASM373019v1	Contig	5.07289	Halobacteria
GCA_003781945.1	ASM378194v1	Contig	3.71546	Halobacteria
GCA_003841465.1	ASM384146v1	Contig	4.61448	Halobacteria
GCA_003841485.1	ASM384148v1	Contig	3.51122	Halobacteria
GCA_003841505.1	ASM384150v1	Contig	4.56649	Halobacteria
GCA_003856835.1	ASM385683v1	Complete Genome	3.50309	Halobacteria
GCA_003862495.1	ASM386249v1	Contig	3.65469	Halobacteria
GCA_003977755.1	ASM397775v1	Scaffold	4.9607	Halobacteria
GCA_003990725.2	ASM399072v2	Complete Genome	3.04447	Halobacteria
GCA_003992375.1	ASM399237v1	Contig	3.31667	Halobacteria
GCA_003992425.1	ASM399242v1	Contig	4.11183	Halobacteria
GCA_004015825.1	ASM401582v1	Scaffold	3.75751	Halobacteria
GCA_004087835.1	ASM408783v1	Complete Genome	3.49092	Halobacteria
GCA_004114375.1	ASM411437v1	Complete Genome	3.66843	Halobacteria
GCA_004114995.1	ASM411499v1	Scaffold	3.63076	Halobacteria
GCA_004116405.1	ASM411640v1	Contig	4.89113	Halobacteria
GCA_004118325.1	ASM411832v1	Scaffold	4.08767	Halobacteria
GCA_004126515.1	ASM412651v1	Complete Genome	3.7263	Halobacteria
GCA_004143485.2	ASM414348v2	Scaffold	3.77926	Halobacteria
GCA_004150385.1	ASM415038v1	Scaffold	3.58983	Halobacteria
GCA_004150395.1	ASM415039v1	Scaffold	4.00178	Halobacteria
GCA_004209855.1	ASM420985v1	Scaffold	3.66608	Halobacteria
GCA_004217335.1	ASM421733v1	Contig	4.25655	Halobacteria
GCA_004521895.1	ASM452189v1	Contig	3.61966	Halobacteria
GCA_004681185.1	ASM468118v1	Scaffold	5.03856	Halobacteria
GCA_004698125.1	ASM469812v1	Scaffold	4.46737	Halobacteria
GCA_004762015.1	ASM476201v1	Contig	3.86856	Halobacteria
GCA_004765785.1	ASM476578v1	Scaffold	4.31831	Halobacteria
GCA_004765795.1	ASM476579v1	Scaffold	3.76372	Halobacteria
GCA_004765805.1	ASM476580v1	Scaffold	3.93395	Halobacteria
GCA_004765815.2	ASM476581v2	Scaffold	4.75324	Halobacteria
GCA_004785955.1	ASM478595v1	Scaffold	3.74523	Halobacteria
GCA_004799605.1	ASM479960v1	Complete Genome	2.42968	Halobacteria
GCA_004799625.1	ASM479962v1	Complete Genome	4.90498	Halobacteria
GCA_004799645.1	ASM479964v1	Complete Genome	4.38241	Halobacteria
GCA_004799665.1	ASM479966v1	Complete Genome	3.45206	Halobacteria
GCA_004799685.1	ASM479968v1	Complete Genome	3.74989	Halobacteria
GCA_004803735.1	ASM480373v1	Complete Genome	3.31606	Halobacteria
GCA_004916935.1	ASM491693v1	Contig	4.40389	Halobacteria
GCA_004916945.1	ASM491694v1	Contig	4.41308	Halobacteria
GCA_004944975.1	ASM494497v1	Scaffold	3.46493	Halobacteria
GCA_005049285.1	ASM504928v1	Contig	3.66113	Halobacteria
GCA_005155585.1	ASM515558v1	Complete Genome	3.0517	Halobacteria
GCA_005239135.1	ASM523913v1	Contig	2.90442	Halobacteria
GCA_005239175.1	ASM523917v1	Scaffold	3.35967	Halobacteria
GCA_005239425.1	ASM523942v1	Scaffold	4.74282	Halobacteria
GCA_005239435.1	ASM523943v1	Scaffold	5.15461	Halobacteria
GCA_005310945.1	ASM531094v1	Complete Genome	4.18492	Halobacteria
GCA_005406125.1	ASM540612v1	Contig	4.21727	Halobacteria
GCA_005406325.1	ASM540632v1	Complete Genome	3.90747	Halobacteria
GCA_005435015.1	ASM543501v1	Scaffold	3.65072	Halobacteria
GCA_005435025.1	ASM543502v1	Scaffold	3.60532	Halobacteria
GCA_005435035.1	ASM543503v1	Scaffold	3.7344	Halobacteria
GCA_005435045.1	ASM543504v1	Scaffold	4.842	Halobacteria
GCA_005435055.1	ASM543505v1	Scaffold	3.62994	Halobacteria
GCA_005435095.1	ASM543509v1	Scaffold	3.52066	Halobacteria
GCA_005435115.1	ASM543511v1	Contig	3.32569	Halobacteria
GCA_005435135.1	ASM543513v1	Scaffold	3.6227	Halobacteria
GCA_005435165.1	ASM543516v1	Contig	3.32121	Halobacteria
GCA_005435175.1	ASM543517v1	Scaffold	3.4793	Halobacteria
GCA_005435185.1	ASM543518v1	Scaffold	5.82283	Halobacteria
GCA_005435195.1	ASM543519v1	Scaffold	3.40661	Halobacteria
GCA_005435225.1	ASM543522v1	Contig	3.37818	Halobacteria
GCA_005435235.1	ASM543523v1	Contig	3.61285	Halobacteria
GCA_005543295.1	ASM554329v1	Scaffold	3.41621	Halobacteria
GCA_005576615.1	ASM557661v1	Complete Genome	4.67447	Halobacteria
GCA_005890195.1	ASM589019v1	Complete Genome	3.77809	Halobacteria
GCA_005938085.1	ASM593808v1	Contig	4.26302	Halobacteria
GCA_005954745.1	ASM595474v1	Complete Genome	3.94245	Halobacteria
GCA_006543045.1	ASM654304v1	Scaffold	4.52154	Halobacteria
GCA_006861655.1	ASM686165v1	Scaffold	2.56434	Halobacteria
GCA_006861665.1	ASM686166v1	Scaffold	2.84144	Halobacteria
GCA_006864335.1	ASM686433v1	Contig	3.34359	Halobacteria
GCA_007004735.1	ASM700473v1	Scaffold	4.1968	Halobacteria
GCA_007118075.1	ASM711807v1	Contig	1.83071	Halobacteria
GCA_007118145.1	ASM711814v1	Contig	1.72344	Halobacteria
GCA_007118975.1	ASM711897v1	Contig	3.43251	Halobacteria
GCA_007119345.1	ASM711934v1	Contig	3.85527	Halobacteria
GCA_007121125.1	ASM712112v1	Contig	2.79159	Halobacteria
GCA_007121215.1	ASM712121v1	Contig	2.57442	Halobacteria
GCA_007121475.1	ASM712147v1	Contig	1.40416	Halobacteria
GCA_007121575.1	ASM712157v1	Contig	1.87733	Halobacteria
GCA_007122115.1	ASM712211v1	Contig	2.53568	Halobacteria
GCA_007122455.1	ASM712245v1	Contig	2.9333	Halobacteria
GCA_007122825.1	ASM712282v1	Contig	1.78863	Halobacteria
GCA_007122875.1	ASM712287v1	Contig	1.8954	Halobacteria
GCA_007123025.1	ASM712302v1	Contig	1.52552	Halobacteria
GCA_007123105.1	ASM712310v1	Contig	1.87782	Halobacteria
GCA_007125235.1	ASM712523v1	Contig	2.1199	Halobacteria
GCA_007125715.1	ASM712571v1	Contig	3.25845	Halobacteria
GCA_007127355.1	ASM712735v1	Contig	2.34422	Halobacteria
GCA_007127735.1	ASM712773v1	Contig	1.62763	Halobacteria
GCA_007128515.1	ASM712851v1	Contig	2.4681	Halobacteria
GCA_007129135.1	ASM712913v1	Contig	2.69899	Halobacteria
GCA_007130175.1	ASM713017v1	Contig	2.50937	Halobacteria
GCA_007131485.1	ASM713148v1	Contig	2.56189	Halobacteria
GCA_007134425.1	ASM713442v1	Contig	2.57385	Halobacteria
GCA_007135435.1	ASM713543v1	Contig	3.11084	Halobacteria
GCA_007135505.1	ASM713550v1	Contig	2.4444	Halobacteria
GCA_007421925.1	ASM742192v1	Scaffold	4.00436	Halobacteria
GCA_007655485.1	ASM765548v1	Scaffold	3.35154	Halobacteria
GCA_007671685.1	ASM767168v1	Scaffold	3.67496	Halobacteria
GCA_007671725.1	ASM767172v1	Contig	3.18286	Halobacteria
GCA_007714225.1	ASM771422v1	Contig	3.78434	Halobacteria
GCA_007833275.1	ASM783327v1	Complete Genome	2.52337	Halobacteria
GCA_007896465.1	ASM789646v1	Contig	4.89392	Halobacteria
GCA_008122205.1	ASM812220v1	Contig	5.31681	Halobacteria
GCA_008124605.1	ASM812460v1	Contig	2.36491	Halobacteria
GCA_008245225.1	ASM824522v1	Contig	4.20149	Halobacteria
GCA_008728975.1	ASM872897v1	Contig	4.33459	Halobacteria
GCA_008729005.1	ASM872900v1	Contig	3.999	Halobacteria
GCA_008729015.1	ASM872901v1	Contig	4.04855	Halobacteria
GCA_008729095.1	ASM872909v1	Contig	3.89689	Halobacteria
GCA_008806815.1	ASM880681v1	Contig	3.56169	Halobacteria
GCA_008806895.1	ASM880689v1	Contig	3.25527	Halobacteria
GCA_008806905.1	ASM880690v1	Contig	3.4807	Halobacteria
GCA_008806915.1	ASM880691v1	Contig	3.48711	Halobacteria
GCA_008831545.1	ASM883154v1	Complete Genome	4.45073	Halobacteria
GCA_009176545.1	ASM917654v1	Contig	4.69083	Halobacteria
GCA_009184545.1	ASM918454v1	Scaffold	2.6606	Halobacteria
GCA_009184555.1	ASM918455v1	Contig	2.43505	Halobacteria
GCA_009184575.1	ASM918457v1	Scaffold	2.42211	Halobacteria
GCA_009217585.1	ASM921758v1	Complete Genome	3.0942	Halobacteria
GCA_009392895.1	ASM939289v1	Complete Genome	4.34848	Halobacteria
GCA_009617995.1	ASM961799v1	Complete Genome	3.32903	Halobacteria
GCA_009663395.1	ASM966339v1	Scaffold	2.76822	Halobacteria
GCA_009674585.1	ASM967458v1	Contig	3.48711	Halobacteria
GCA_009674605.1	ASM967460v1	Contig	3.56169	Halobacteria
GCA_009674625.1	ASM967462v1	Contig	3.4807	Halobacteria
GCA_009690625.1	ASM969062v1	Complete Genome	2.62839	Halobacteria
GCA_009741785.1	ASM974178v1	Contig	3.79862	Halobacteria
GCA_009741825.1	ASM974182v1	Contig	2.96502	Halobacteria
GCA_009741925.1	ASM974192v1	Contig	3.45203	Halobacteria
GCA_009741955.1	ASM974195v1	Contig	4.09566	Halobacteria
GCA_009741975.1	ASM974197v1	Contig	2.73087	Halobacteria
GCA_009742825.1	ASM974282v1	Contig	3.23017	Halobacteria
GCA_009762275.1	ASM976227v1	Complete Genome	3.5603	Halobacteria
GCA_009789175.1	ASM978917v1	Complete Genome	3.73236	Halobacteria
GCA_009791395.1	ASM979139v1	Contig	4.06971	Halobacteria
GCA_009797925.1	ASM979792v1	Contig	2.61766	Halobacteria
GCA_009806985.1	ASM980698v1	Scaffold	3.10882	Halobacteria
GCA_009807105.1	ASM980710v1	Scaffold	4.16263	Halobacteria
GCA_009831455.1	ASM983145v1	Contig	3.36902	Halobacteria
GCA_009831555.1	ASM983155v1	Contig	3.49948	Halobacteria
GCA_009831575.1	ASM983157v1	Contig	3.24592	Halobacteria
GCA_009831625.1	ASM983162v1	Contig	3.77577	Halobacteria
GCA_009834785.1	ASM983478v1	Scaffold	4.55677	Halobacteria
GCA_009856205.1	ASM985620v1	Contig	3.37964	Halobacteria
GCA_009856455.1	ASM985645v1	Contig	3.20793	Halobacteria
GCA_009900715.1	ASM990071v1	Scaffold	3.52198	Halobacteria
GCA_010092465.1	ASM1009246v1	Complete Genome	2.89061	Halobacteria
GCA_010119195.1	ASM1011919v1	Scaffold	3.7881	Halobacteria
GCA_010119205.1	ASM1011920v1	Contig	3.90668	Halobacteria
GCA_010692885.1	ASM1069288v1	Complete Genome	3.99432	Halobacteria
GCA_010692905.1	ASM1069290v1	Complete Genome	3.70698	Halobacteria
GCA_010747475.1	ASM1074747v1	Contig	4.40856	Halobacteria
GCA_011043775.1	ASM1104377v1	Contig	4.56299	Halobacteria
GCA_011440255.1	ASM1144025v1	Scaffold	4.52868	Halobacteria
GCA_011440285.1	ASM1144028v1	Contig	4.117	Halobacteria
GCA_011440375.1	ASM1144037v1	Scaffold	3.76446	Halobacteria
GCA_011440385.1	ASM1144038v1	Contig	4.37218	Halobacteria
GCA_011602445.1	ASM1160244v1	Complete Genome	4.93083	Halobacteria
GCA_011627345.1	ASM1162734v1	Scaffold	3.1615	Halobacteria
GCA_011627385.1	ASM1162738v1	Contig	4.11183	Halobacteria
GCA_011734195.1	ASM1173419v1	Contig	2.98309	Halobacteria
GCA_011765365.1	ASM1176536v1	Complete Genome	2.81855	Halobacteria
GCA_012163165.1	ASM1216316v1	Scaffold	4.05165	Halobacteria
GCA_012726095.1	ASM1272609v1	Scaffold	3.39584	Halobacteria
GCA_012726105.1	ASM1272610v1	Scaffold	3.66966	Halobacteria
GCA_012726115.1	ASM1272611v1	Scaffold	4.01327	Halobacteria
GCA_012726155.1	ASM1272615v1	Scaffold	3.92899	Halobacteria
GCA_013003705.1	ASM1300370v1	Contig	1.95399	Halobacteria
GCA_013003855.1	ASM1300385v1	Contig	1.79032	Halobacteria
GCA_013041945.1	ASM1304194v1	Contig	2.3678	Halobacteria
GCA_013267195.1	ASM1326719v1	Complete Genome	3.34025	Halobacteria
GCA_013329575.1	ASM1332957v1	Scaffold	1.2431	Halobacteria
GCA_013330005.1	ASM1333000v1	Scaffold	0.761354	Halobacteria
GCA_013330985.1	ASM1333098v1	Scaffold	0.894474	Halobacteria
GCA_013331365.1	ASM1333136v1	Scaffold	0.758925	Halobacteria
GCA_013342135.1	ASM1334213v1	Contig	4.99457	Halobacteria
GCA_013342145.1	ASM1334214v1	Contig	4.55201	Halobacteria
GCA_013342525.1	ASM1334252v1	Contig	3.19381	Halobacteria
GCA_013391085.1	ASM1339108v1	Complete Genome	3.21168	Halobacteria
GCA_013391105.1	ASM1339110v1	Complete Genome	3.74657	Halobacteria
GCA_013391635.1	ASM1339163v1	Contig	3.37713	Halobacteria
GCA_013401515.1	ASM1340151v1	Complete Genome	4.27796	Halobacteria
GCA_013402815.2	ASM1340281v2	Complete Genome	4.84219	Halobacteria
GCA_013402875.1	ASM1340287v1	Complete Genome	4.25875	Halobacteria
GCA_013415885.1	ASM1341588v1	Complete Genome	4.48015	Halobacteria
GCA_013415905.1	ASM1341590v1	Complete Genome	5.19903	Halobacteria
GCA_013456555.2	ASM1345655v2	Complete Genome	5.33631	Halobacteria
GCA_013839425.1	ASM1383942v1	Scaffold	2.85981	Halobacteria
GCA_013839515.1	ASM1383951v1	Scaffold	2.77952	Halobacteria
GCA_014202515.1	ASM1420251v1	Contig	2.36896	Halobacteria
GCA_014212355.1	ASM1421235v1	Contig	3.4904	Halobacteria
GCA_014530665.1	ASM1453066v1	Scaffold	3.77809	Halobacteria
GCA_014635105.1	ASM1463510v1	Contig	3.87888	Halobacteria
GCA_014646875.1	ASM1464687v1	Scaffold	3.06752	Halobacteria
GCA_014647095.1	ASM1464709v1	Contig	3.77473	Halobacteria
GCA_014647115.1	ASM1464711v1	Contig	2.81354	Halobacteria
GCA_014647155.1	ASM1464715v1	Contig	3.14119	Halobacteria
GCA_014647235.1	ASM1464723v1	Contig	3.96141	Halobacteria
GCA_014647415.1	ASM1464741v1	Scaffold	4.17022	Halobacteria
GCA_014647455.2	ASM1464745v2	Scaffold	3.02467	Halobacteria
GCA_014647475.1	ASM1464747v1	Contig	3.38035	Halobacteria
GCA_014969745.1	ASM1496974v1	Complete Genome	3.99624	Halobacteria
GCA_016065055.1	ASM1606505v1	Complete Genome	4.15805	Halobacteria
GCA_016635065.1	ASM1663506v1	Contig	3.30121	Halobacteria
GCA_016906025.1	ASM1690602v1	Complete Genome	5.08724	Halobacteria
GCA_016917835.3	ASM1691783v3	Complete Genome	2.44737	Halobacteria
GCA_016917855.1	ASM1691785v1	Complete Genome	2.32622	Halobacteria
GCA_017094445.1	ASM1709444v1	Complete Genome	3.07802	Halobacteria
GCA_017094465.1	ASM1709446v1	Complete Genome	2.88038	Halobacteria
GCA_017094485.1	ASM1709448v1	Complete Genome	3.04113	Halobacteria
GCA_017094505.1	ASM1709450v1	Complete Genome	2.94034	Halobacteria
GCA_017094525.1	ASM1709452v1	Complete Genome	2.89391	Halobacteria
GCA_017352095.1	ASM1735209v1	Complete Genome	3.58887	Halobacteria
GCA_017352155.2	ASM1735215v2	Complete Genome	4.27069	Halobacteria
GCA_017357105.2	ASM1735710v2	Complete Genome	4.23511	Halobacteria
GCA_017357405.1	ASM1735740v1	Complete Genome	5.1666	Halobacteria
GCA_017612575.1	ASM1761257v1	Scaffold	3.36741	Halobacteria
GCA_017873555.1	ASM1787355v1	Contig	3.08099	Halobacteria
GCA_017873775.1	ASM1787377v1	Contig	2.81594	Halobacteria
GCA_017873815.1	ASM1787381v1	Contig	3.09817	Halobacteria
GCA_017874235.1	ASM1787423v1	Contig	2.75232	Halobacteria
GCA_017874695.1	ASM1787469v1	Contig	3.12271	Halobacteria
GCA_018200015.1	ASM1820001v1	Complete Genome	4.53713	Halobacteria
GCA_018228765.1	ASM1822876v1	Complete Genome	3.02182	Halobacteria
GCA_018334775.1	ASM1833477v1	Contig	1.65053	Halobacteria
GCA_018419995.1	ASM1841999v1	Contig	3.93958	Halobacteria
GCA_018420015.1	ASM1842001v1	Contig	3.94015	Halobacteria
GCA_018420055.1	ASM1842005v1	Contig	3.94003	Halobacteria
GCA_018420065.1	ASM1842006v1	Contig	3.93656	Halobacteria
GCA_018609665.1	ASM1860966v1	Contig	2.4824	Halobacteria
GCA_018609705.1	ASM1860970v1	Contig	2.13641	Halobacteria
GCA_018609735.1	ASM1860973v1	Contig	2.5416	Halobacteria
GCA_018609805.1	ASM1860980v1	Contig	2.19481	Halobacteria
GCA_018609905.1	ASM1860990v1	Contig	2.33584	Halobacteria
GCA_018609935.1	ASM1860993v1	Contig	2.2595	Halobacteria
GCA_018609945.1	ASM1860994v1	Contig	2.92908	Halobacteria
GCA_018609965.1	ASM1860996v1	Contig	2.6122	Halobacteria
GCA_018610005.1	ASM1861000v1	Contig	1.5854	Halobacteria
GCA_018610045.1	ASM1861004v1	Contig	3.42642	Halobacteria
GCA_018610065.1	ASM1861006v1	Contig	1.62269	Halobacteria
GCA_018610085.1	ASM1861008v1	Contig	1.33722	Halobacteria
GCA_018623055.1	ASM1862305v1	Complete Genome	3.06352	Halobacteria
GCA_019061225.1	ASM1906122v1	Contig	3.79862	Halobacteria
GCA_019061235.1	ASM1906123v1	Contig	3.9048	Halobacteria
GCA_019599405.1	ASM1959940v1	Scaffold	4.02725	Halobacteria
GCA_019599465.1	ASM1959946v1	Contig	4.66706	Halobacteria
GCA_019599485.1	ASM1959948v1	Scaffold	4.06725	Halobacteria
GCA_019599505.1	ASM1959950v1	Contig	5.19519	Halobacteria
GCA_019599515.1	ASM1959951v1	Contig	3.92628	Halobacteria
GCA_019693215.1	ASM1969321v1	Complete Genome	2.65668	Halobacteria
GCA_019823105.1	ASM1982310v1	Complete Genome	3.73245	Halobacteria
GCA_019879105.1	ASM1987910v1	Complete Genome	5.67467	Halobacteria
GCA_019880225.1	ASM1988022v1	Complete Genome	3.05805	Halobacteria
GCA_019880245.1	ASM1988024v1	Complete Genome	3.7199	Halobacteria
GCA_020097815.1	ASM2009781v1	Complete Genome	3.42175	Halobacteria
GCA_020097835.1	ASM2009783v1	Complete Genome	3.94713	Halobacteria
GCA_020105915.1	ASM2010591v1	Scaffold	4.12534	Halobacteria
GCA_020150815.1	ASM2015081v1	Complete Genome	3.72771	Halobacteria
GCA_020177165.1	ASM2017716v1	Contig	4.52891	Halobacteria
GCA_020177375.1	ASM2017737v1	Contig	4.53347	Halobacteria
GCA_020201445.1	ASM2020144v1	Contig	1.78447	Halobacteria
GCA_020201475.1	ASM2020147v1	Contig	1.54195	Halobacteria
GCA_020201485.1	ASM2020148v1	Contig	2.24324	Halobacteria
GCA_020217425.1	ASM2021742v1	Complete Genome	4.2547	Halobacteria
GCA_020405185.1	ASM2040518v1	Complete Genome	3.84647	Halobacteria
GCA_020405205.1	ASM2040520v1	Complete Genome	4.7042	Halobacteria
GCA_020405225.1	ASM2040522v1	Complete Genome	5.09732	Halobacteria
GCA_020405245.1	ASM2040524v1	Complete Genome	4.14655	Halobacteria
GCA_020515625.1	ASM2051562v1	Contig	4.71011	Halobacteria
GCA_020567425.1	ASM2056742v1	Contig	4.05525	Halobacteria
GCA_020567525.1	ASM2056752v1	Contig	4.06518	Halobacteria
GCA_020614375.1	ASM2061437v1	Complete Genome	5.03526	Halobacteria
GCA_020614395.1	ASM2061439v1	Complete Genome	2.33928	Halobacteria
GCA_020618475.1	ASM2061847v1	Complete Genome	7.27939	Halobacteria
GCA_020700235.1	ASM2070023v1	Complete Genome	6.27052	Halobacteria
GCA_020736485.1	ASM2073648v1	Complete Genome	2.29104	Halobacteria
GCA_021028995.1	ASM2102899v1	Contig	3.33691	Halobacteria
GCA_021029015.1	ASM2102901v1	Contig	3.49203	Halobacteria
GCA_021083305.1	ASM2108330v1	Contig	5.68225	Halobacteria
GCA_021233415.1	ASM2123341v1	Complete Genome	2.709	Halobacteria
GCA_021233435.1	ASM2123343v1	Complete Genome	3.3168	Halobacteria
GCA_021249345.1	ASM2124934v1	Complete Genome	3.11219	Halobacteria
GCA_021249405.1	ASM2124940v1	Complete Genome	2.82888	Halobacteria
GCA_021431925.1	ASM2143192v1	Complete Genome	3.32012	Halobacteria
GCA_021503975.1	ASM2150397v1	Contig	2.46699	Halobacteria
GCA_021503995.1	ASM2150399v1	Scaffold	2.05978	Halobacteria
GCA_021504015.1	ASM2150401v1	Contig	2.23647	Halobacteria
GCA_021504035.1	ASM2150403v1	Contig	2.42856	Halobacteria
GCA_021504045.1	ASM2150404v1	Contig	2.43269	Halobacteria
GCA_021729015.1	ASM2172901v1	Contig	3.06574	Halobacteria
GCA_021963785.1	ASM2196378v1	Contig	3.03749	Halobacteria
GCA_021965275.1	ASM2196527v1	Contig	3.55049	Halobacteria
GCA_022450005.1	ASM2245000v1	Scaffold	1.01319	Halobacteria
GCA_022807515.1	ASM2280751v1	Scaffold	3.58983	Halobacteria
GCA_022869805.1	ASM2286980v1	Complete Genome	5.05868	Halobacteria
GCA_022870485.1	ASM2287048v1	Complete Genome	3.96547	Halobacteria
GCA_023008545.1	ASM2300854v1	Complete Genome	4.61164	Halobacteria
GCA_023008565.1	ASM2300856v1	Complete Genome	4.39468	Halobacteria
GCA_023008585.1	ASM2300858v1	Complete Genome	4.35251	Halobacteria
GCA_023028105.1	ASM2302810v1	Complete Genome	4.75788	Halobacteria
GCA_023028225.1	ASM2302822v1	Complete Genome	3.21408	Halobacteria
GCA_023028345.1	ASM2302834v1	Complete Genome	4.75414	Halobacteria
GCA_023074835.1	ASM2307483v1	Contig	4.46194	Halobacteria
GCA_023077655.1	ASM2307765v1	Contig	4.59805	Halobacteria
GCA_023093535.1	ASM2309353v1	Complete Genome	3.89482	Halobacteria
GCA_023115355.1	ASM2311535v1	Complete Genome	4.01225	Halobacteria
GCA_023204835.1	ASM2320483v1	Chromosome	3.16963	Halobacteria
GCA_023238205.1	ASM2323820v1	Complete Genome	4.62494	Halobacteria
GCA_023238445.1	ASM2323844v1	Complete Genome	3.66837	Halobacteria
GCA_023276355.1	ASM2327635v1	Contig	2.94151	Halobacteria
GCA_023276375.1	ASM2327637v1	Contig	5.31776	Halobacteria
GCA_023544685.1	ASM2354468v1	Scaffold	2.53396	Halobacteria
GCA_023566035.1	ASM2356603v1	Contig	3.66113	Halobacteria
GCA_023566055.1	ASM2356605v1	Contig	4.59454	Halobacteria
GCA_023622565.1	ASM2362256v1	Contig	2.00623	Halobacteria
GCA_023622685.1	ASM2362268v1	Contig	2.8429	Halobacteria
GCA_023623025.1	ASM2362302v1	Contig	2.53213	Halobacteria
GCA_023638035.1	ASM2363803v1	Contig	3.26064	Halobacteria
GCA_023638055.1	ASM2363805v1	Scaffold	3.28972	Halobacteria
GCA_023698535.1	ASM2369853v1	Contig	4.03195	Halobacteria
GCA_023699475.1	ASM2369947v1	Scaffold	4.06849	Halobacteria
GCA_023702125.1	ASM2370212v1	Complete Genome	3.06342	Halobacteria
GCA_023703775.1	ASM2370377v1	Complete Genome	3.43599	Halobacteria
GCA_023703795.1	ASM2370379v1	Complete Genome	3.83989	Halobacteria
GCA_023913515.1	ASM2391351v1	Complete Genome	4.74342	Halobacteria
GCA_023973145.1	ASM2397314v1	Complete Genome	3.83667	Halobacteria
GCA_024136965.1	ASM2413696v1	Contig	4.8247	Halobacteria
GCA_024136975.1	ASM2413697v1	Contig	4.86013	Halobacteria
GCA_024136985.1	ASM2413698v1	Contig	3.96636	Halobacteria
GCA_024138125.1	ASM2413812v1	Complete Genome	3.59652	Halobacteria
GCA_024138145.1	ASM2413814v1	Complete Genome	3.8546	Halobacteria
GCA_024138165.1	ASM2413816v1	Complete Genome	5.05107	Halobacteria
GCA_024178165.1	ASM2417816v1	Contig	3.04123	Halobacteria
GCA_024204665.1	ASM2420466v1	Complete Genome	4.31216	Halobacteria
GCA_024218775.1	ASM2421877v1	Complete Genome	3.73965	Halobacteria
GCA_024218795.1	ASM2421879v1	Complete Genome	4.73943	Halobacteria
GCA_024218815.1	ASM2421881v1	Complete Genome	3.91018	Halobacteria
GCA_024227435.1	ASM2422743v1	Complete Genome	4.77136	Halobacteria
GCA_024227715.1	ASM2422771v1	Complete Genome	3.88495	Halobacteria
GCA_024227995.1	ASM2422799v1	Complete Genome	3.72198	Halobacteria
GCA_024228315.1	ASM2422831v1	Complete Genome	4.60176	Halobacteria
GCA_024228675.1	ASM2422867v1	Complete Genome	4.90641	Halobacteria
GCA_024266705.1	ASM2426670v1	Complete Genome	5.44358	Halobacteria
GCA_024296665.1	ASM2429666v1	Complete Genome	3.62256	Halobacteria
GCA_024296685.1	ASM2429668v1	Complete Genome	3.766	Halobacteria
GCA_024298825.1	ASM2429882v1	Complete Genome	4.19038	Halobacteria
GCA_024298845.1	ASM2429884v1	Complete Genome	4.21755	Halobacteria
GCA_024298865.1	ASM2429886v1	Complete Genome	4.39933	Halobacteria
GCA_024298885.1	ASM2429888v1	Complete Genome	4.44569	Halobacteria
GCA_024298905.1	ASM2429890v1	Complete Genome	3.99356	Halobacteria
GCA_024300625.1	ASM2430062v1	Complete Genome	3.70063	Halobacteria
GCA_024300825.1	ASM2430082v1	Complete Genome	3.65228	Halobacteria
GCA_024362405.1	ASM2436240v1	Complete Genome	4.16763	Halobacteria
GCA_024362485.1	ASM2436248v1	Complete Genome	4.20867	Halobacteria
GCA_024362525.1	ASM2436252v1	Complete Genome	3.9861	Halobacteria
GCA_024449025.1	ASM2444902v1	Scaffold	3.21435	Halobacteria
GCA_024464185.1	ASM2446418v1	Contig	3.85106	Halobacteria
GCA_024464595.1	ASM2446459v1	Contig	3.85723	Halobacteria
GCA_024464655.1	ASM2446465v1	Contig	3.40819	Halobacteria
GCA_024494565.1	ASM2449456v1	Contig	3.4447	Halobacteria
GCA_024494575.1	ASM2449457v1	Contig	2.72753	Halobacteria
GCA_024494595.1	ASM2449459v1	Contig	3.65514	Halobacteria
GCA_024494645.1	ASM2449464v1	Contig	3.81033	Halobacteria
GCA_024494655.1	ASM2449465v1	Contig	3.62188	Halobacteria
GCA_024494685.1	ASM2449468v1	Contig	3.22715	Halobacteria
GCA_024494695.1	ASM2449469v1	Contig	4.03256	Halobacteria
GCA_024494725.1	ASM2449472v1	Contig	3.27591	Halobacteria
GCA_024495425.1	ASM2449542v1	Contig	4.04932	Halobacteria
GCA_024498175.1	ASM2449817v1	Complete Genome	3.45091	Halobacteria
GCA_024498195.1	ASM2449819v1	Complete Genome	3.90276	Halobacteria
GCA_024498335.1	ASM2449833v1	Complete Genome	2.85396	Halobacteria
GCA_024508235.1	ASM2450823v1	Complete Genome	2.70339	Halobacteria
GCA_024609245.1	ASM2460924v1	Contig	3.89401	Halobacteria
GCA_024730625.1	ASM2473062v1	Complete Genome	3.72072	Halobacteria
GCA_024972735.1	ASM2497273v1	Complete Genome	3.17913	Halobacteria
GCA_024972755.1	ASM2497275v1	Complete Genome	2.78769	Halobacteria
GCA_025041155.1	ASM2504115v1	Contig	4.07817	Halobacteria
GCA_025041175.1	ASM2504117v1	Contig	5.96989	Halobacteria
GCA_025041195.1	ASM2504119v1	Contig	3.72886	Halobacteria
GCA_025041215.1	ASM2504121v1	Contig	6.04736	Halobacteria
GCA_025041235.1	ASM2504123v1	Contig	4.0729	Halobacteria
GCA_025231485.1	ASM2523148v1	Complete Genome	4.37671	Halobacteria
GCA_025399835.1	ASM2539983v1	Contig	4.18799	Halobacteria
GCA_025457585.1	ASM2545758v1	Contig	3.68574	Halobacteria
GCA_025457605.1	ASM2545760v1	Contig	3.68574	Halobacteria
GCA_025517425.1	ASM2551742v1	Scaffold	2.80547	Halobacteria
GCA_025517465.1	ASM2551746v1	Scaffold	4.25269	Halobacteria
GCA_025517485.1	ASM2551748v1	Contig	5.5064	Halobacteria
GCA_025517495.1	ASM2551749v1	Scaffold	5.58697	Halobacteria
GCA_025517525.1	ASM2551752v1	Scaffold	4.54132	Halobacteria
GCA_025517535.1	ASM2551753v1	Contig	3.36006	Halobacteria
GCA_025517565.1	ASM2551756v1	Scaffold	3.38351	Halobacteria
GCA_025629245.1	ASM2562924v1	Contig	3.75949	Halobacteria
GCA_025913575.1	ASM2591357v1	Complete Genome	3.95701	Halobacteria
GCA_025947005.1	ASM2594700v1	Complete Genome	5.03606	Halobacteria
GCA_026008575.1	ASM2600857v1	Scaffold	4.35591	Halobacteria
GCA_026013925.1	ASM2601392v1	Complete Genome	5.08647	Halobacteria
GCA_026192975.1	ASM2619297v1	Contig	4.31678	Halobacteria
GCA_026242195.1	ASM2624219v1	Scaffold	2.10378	Halobacteria
GCA_026248685.1	ASM2624868v1	Complete Genome	4.81835	Halobacteria
GCA_026410925.1	ASM2641092v1	Complete Genome	3.76993	Halobacteria
GCA_026586625.1	ASM2658662v1	Scaffold	4.46181	Halobacteria
GCA_026586665.1	ASM2658666v1	Contig	3.57497	Halobacteria
GCA_026586675.1	ASM2658667v1	Scaffold	3.17426	Halobacteria
GCA_026616195.1	ASM2661619v1	Contig	4.60825	Halobacteria
GCA_026616205.1	ASM2661620v1	Contig	3.02439	Halobacteria
GCA_026712385.1	ASM2671238v1	Scaffold	3.97702	Halobacteria
GCA_027249345.1	ASM2724934v1	Contig	1.16483	Halobacteria
GCA_027249925.1	ASM2724992v1	Contig	1.10567	Halobacteria
GCA_027250495.1	ASM2725049v1	Contig	1.1692	Halobacteria
GCA_027250675.1	ASM2725067v1	Contig	1.15213	Halobacteria
GCA_027250895.1	ASM2725089v1	Contig	1.13058	Halobacteria
GCA_027251195.1	ASM2725119v1	Contig	1.17185	Halobacteria
GCA_027257195.1	ASM2725719v1	Scaffold	3.28193	Halobacteria
GCA_027563145.1	ASM2756314v1	Complete Genome	3.74809	Halobacteria
GCA_028210825.1	ASM2821082v1	Scaffold	3.36788	Halobacteria
GCA_028210945.1	ASM2821094v1	Scaffold	4.06952	Halobacteria
GCA_028210995.1	ASM2821099v1	Contig	3.45516	Halobacteria
GCA_028211005.1	ASM2821100v1	Scaffold	3.54062	Halobacteria
GCA_028211085.1	ASM2821108v1	Scaffold	3.64965	Halobacteria
GCA_028211095.1	ASM2821109v1	Scaffold	3.94972	Halobacteria
GCA_028211175.1	ASM2821117v1	Contig	3.57595	Halobacteria
GCA_028211185.1	ASM2821118v1	Contig	3.54273	Halobacteria
GCA_028211205.1	ASM2821120v1	Contig	3.53283	Halobacteria
GCA_028211255.1	ASM2821125v1	Contig	3.54152	Halobacteria
GCA_028211275.1	ASM2821127v1	Scaffold	3.72747	Halobacteria
GCA_028211285.1	ASM2821128v1	Contig	3.65363	Halobacteria
GCA_028211295.1	ASM2821129v1	Contig	3.69506	Halobacteria
GCA_028211335.1	ASM2821133v1	Contig	3.5596	Halobacteria
GCA_028211355.1	ASM2821135v1	Scaffold	3.42162	Halobacteria
GCA_028211375.1	ASM2821137v1	Contig	3.56706	Halobacteria
GCA_028211395.1	ASM2821139v1	Contig	3.59116	Halobacteria
GCA_028211405.1	ASM2821140v1	Contig	3.66252	Halobacteria
GCA_028274745.1	ASM2827474v1	Contig	1.33715	Halobacteria
GCA_028274785.1	ASM2827478v1	Contig	1.48159	Halobacteria
GCA_028274805.1	ASM2827480v1	Contig	1.11228	Halobacteria
GCA_028274825.1	ASM2827482v1	Contig	3.37107	Halobacteria
GCA_028274865.1	ASM2827486v1	Contig	2.37309	Halobacteria
GCA_028274885.1	ASM2827488v1	Contig	2.18136	Halobacteria
GCA_028274905.1	ASM2827490v1	Contig	0.654471	Halobacteria
GCA_028274925.1	ASM2827492v1	Contig	3.26852	Halobacteria
GCA_028274945.1	ASM2827494v1	Contig	1.16098	Halobacteria
GCA_028274965.1	ASM2827496v1	Contig	2.27638	Halobacteria
GCA_028274985.1	ASM2827498v1	Contig	1.47623	Halobacteria
GCA_028275005.1	ASM2827500v1	Contig	2.43065	Halobacteria
GCA_028275025.1	ASM2827502v1	Contig	2.03099	Halobacteria
GCA_028275045.1	ASM2827504v1	Contig	2.32703	Halobacteria
GCA_028275055.1	ASM2827505v1	Contig	2.30932	Halobacteria
GCA_028275075.1	ASM2827507v1	Contig	2.05969	Halobacteria
GCA_028275105.1	ASM2827510v1	Contig	2.4956	Halobacteria
GCA_028275115.1	ASM2827511v1	Contig	3.53133	Halobacteria
GCA_028275145.1	ASM2827514v1	Contig	2.38235	Halobacteria
GCA_028275165.1	ASM2827516v1	Contig	3.10218	Halobacteria
GCA_028328625.1	ASM2832862v1	Scaffold	3.50221	Halobacteria
GCA_028328665.1	ASM2832866v1	Contig	3.45608	Halobacteria
GCA_028329625.1	ASM2832962v1	Scaffold	3.49867	Halobacteria
GCA_028329665.1	ASM2832966v1	Scaffold	3.4497	Halobacteria
GCA_028329825.1	ASM2832982v1	Scaffold	3.45549	Halobacteria
GCA_028329875.1	ASM2832987v1	Scaffold	3.74451	Halobacteria
GCA_028329905.1	ASM2832990v1	Contig	3.45755	Halobacteria
GCA_028329925.1	ASM2832992v1	Scaffold	3.49867	Halobacteria
GCA_028329965.1	ASM2832996v1	Contig	3.68083	Halobacteria
GCA_028329985.1	ASM2832998v1	Scaffold	3.49908	Halobacteria
GCA_028330445.1	ASM2833044v1	Contig	3.53041	Halobacteria
GCA_028330485.1	ASM2833048v1	Scaffold	3.50462	Halobacteria
GCA_028330545.1	ASM2833054v1	Scaffold	3.50022	Halobacteria
GCA_028330555.1	ASM2833055v1	Scaffold	3.5006	Halobacteria
GCA_028330585.1	ASM2833058v1	Scaffold	3.68347	Halobacteria
GCA_028330605.1	ASM2833060v1	Scaffold	3.51528	Halobacteria
GCA_028330625.1	ASM2833062v1	Scaffold	3.53102	Halobacteria
GCA_900003505.1	ASM90000350v1	Scaffold	3.23578	Halobacteria
GCA_900003515.1	ASM90000351v1	Scaffold	3.23748	Halobacteria
GCA_900003525.1	ASM90000352v1	Scaffold	3.23531	Halobacteria
GCA_900003565.1	ASM90000356v1	Scaffold	3.23517	Halobacteria
GCA_900003575.1	ASM90000357v1	Scaffold	3.23341	Halobacteria
GCA_900004275.1	ASM90000427v1	Scaffold	3.23827	Halobacteria
GCA_900005775.1	ASM90000577v1	Scaffold	3.23365	Halobacteria
GCA_900100335.1	IMG-taxon 2636416021 annotated assembly	Contig	4.64179	Halobacteria
GCA_900100385.1	IMG-taxon 2651870124 annotated assembly	Scaffold	3.28712	Halobacteria
GCA_900100875.1	IMG-taxon 2671180169 annotated assembly	Contig	3.87175	Halobacteria
GCA_900101245.1	IMG-taxon 2651869596 annotated assembly	Scaffold	3.91427	Halobacteria
GCA_900102305.1	IMG-taxon 2651870125 annotated assembly	Scaffold	4.0322	Halobacteria
GCA_900102375.1	IMG-taxon 2617270761 annotated assembly	Scaffold	3.26138	Halobacteria
GCA_900103505.1	IMG-taxon 2651870127 annotated assembly	Scaffold	3.76861	Halobacteria
GCA_900103715.1	IMG-taxon 2617270902 annotated assembly	Contig	3.77019	Halobacteria
GCA_900104065.1	IMG-taxon 2636416047 annotated assembly	Scaffold	4.00987	Halobacteria
GCA_900106715.1	IMG-taxon 2693429892 annotated assembly	Scaffold	3.89664	Halobacteria
GCA_900107195.1	IMG-taxon 2617270777 annotated assembly	Contig	3.75498	Halobacteria
GCA_900107205.1	IMG-taxon 2654587885 annotated assembly	Scaffold	3.42449	Halobacteria
GCA_900107665.1	IMG-taxon 2617270898 annotated assembly	Scaffold	2.77686	Halobacteria
GCA_900108095.1	IMG-taxon 2617270925 annotated assembly	Scaffold	3.78254	Halobacteria
GCA_900108165.1	IMG-taxon 2619618869 annotated assembly	Scaffold	3.73596	Halobacteria
GCA_900108505.1	IMG-taxon 2651870118 annotated assembly	Scaffold	3.13682	Halobacteria
GCA_900109065.1	IMG-taxon 2693429898 annotated assembly	Contig	3.28459	Halobacteria
GCA_900109695.1	IMG-taxon 2639762639 annotated assembly	Scaffold	3.89408	Halobacteria
GCA_900110215.1	IMG-taxon 2654588107 annotated assembly	Scaffold	4.86976	Halobacteria
GCA_900110455.1	IMG-taxon 2671180170 annotated assembly	Scaffold	4.27217	Halobacteria
GCA_900110465.1	IMG-taxon 2617270928 annotated assembly	Scaffold	5.18569	Halobacteria
GCA_900110535.1	IMG-taxon 2617270915 annotated assembly	Contig	2.95279	Halobacteria
GCA_900110865.1	IMG-taxon 2639762573 annotated assembly	Scaffold	4.85702	Halobacteria
GCA_900111485.1	IMG-taxon 2642422550 annotated assembly	Scaffold	3.96348	Halobacteria
GCA_900111935.1	IMG-taxon 2617270732 annotated assembly	Scaffold	3.03055	Halobacteria
GCA_900112175.1	IMG-taxon 2617270920 annotated assembly	Contig	4.18712	Halobacteria
GCA_900112205.1	IMG-taxon 2693429869 annotated assembly	Scaffold	4.49544	Halobacteria
GCA_900113245.1	IMG-taxon 2617270917 annotated assembly	Contig	3.52931	Halobacteria
GCA_900113615.1	IMG-taxon 2617270873 annotated assembly	Contig	3.1841	Halobacteria
GCA_900114025.1	IMG-taxon 2693429900 annotated assembly	Contig	3.72347	Halobacteria
GCA_900114435.1	IMG-taxon 2667527389 annotated assembly	Scaffold	4.25033	Halobacteria
GCA_900114455.1	IMG-taxon 2619618990 annotated assembly	Scaffold	4.56668	Halobacteria
GCA_900115675.1	IMG-taxon 2663762745 annotated assembly	Contig	3.16063	Halobacteria
GCA_900115785.1	IMG-taxon 2617270895 annotated assembly	Scaffold	3.61627	Halobacteria
GCA_900116205.1	IMG-taxon 2639762563 annotated assembly	Contig	4.10815	Halobacteria
GCA_900129775.1	IMG-taxon 2695420988 annotated assembly	Scaffold	3.20825	Halobacteria
GCA_900142335.1	IMG-taxon 2698536698 annotated assembly	Contig	4.2837	Halobacteria
GCA_900156425.1	IMG-taxon 2681812914 annotated assembly	Scaffold	4.67171	Halobacteria
GCA_900156445.1	IMG-taxon 2681812915 annotated assembly	Contig	3.83092	Halobacteria
GCA_900156475.1	IMG-taxon 2681812919 annotated assembly	Scaffold	4.20979	Halobacteria
GCA_900182635.1	IMG-taxon 2724679794 annotated assembly	Contig	3.17602	Halobacteria
GCA_900188065.1	IMG-taxon 2724679803 annotated assembly	Contig	3.47786	Halobacteria
GCA_900188075.1	IMG-taxon 2724679704 annotated assembly	Contig	3.66685	Halobacteria
GCA_900215575.1	IMG-taxon 2728369221 annotated assembly	Contig	3.16418	Halobacteria
GCA_900880625.1	WSM64	Contig	3.3625	Halobacteria
GCA_902209435.1	Katie-F-Assembly-1	Contig	3.94831	Halobacteria
GCA_902377425.1	MGYG-HGUT-01693	Contig	3.42504	Halobacteria
GCA_902381785.1	UHGG_MGYG-HGUT-01639	Scaffold	4.01518	Halobacteria
GCA_902410085.1	KTX-Assembly-1	Contig	4.2886	Halobacteria
GCA_903989495.1	D2T7	Scaffold	2.43353	Halobacteria
GCA_903989505.1	D2T2	Contig	2.97246	Halobacteria
GCA_903989525.1	D2T1	Scaffold	3.61124	Halobacteria
GCA_903989535.1	D2T31	Scaffold	2.73292	Halobacteria
GCA_903989545.1	D2T0	Contig	3.05815	Halobacteria
GCA_937121375.1	ERR2683643_bin.15_CONCOCT_v1.1_MAG	Contig	2.92472	Halobacteria
GCA_937124535.1	ERR2683645_bin.8_CONCOCT_v1.1_MAG	Contig	1.94214	Halobacteria
GCA_937140895.1	ERR2683643_bin.3_CONCOCT_v1.1_MAG	Contig	1.84846	Halobacteria
GCA_937140945.1	ERR2683645_bin.32_CONCOCT_v1.1_MAG	Contig	1.98702	Halobacteria
GCA_937142015.1	ERR2683608_bin.7_CONCOCT_v1.1_MAG	Contig	4.33734	Halobacteria
GCA_937146515.1	ERR2683608_bin.60_CONCOCT_v1.1_MAG	Contig	3.55859	Halobacteria
GCA_937146585.1	ERR2683635_bin.44_CONCOCT_v1.1_MAG	Contig	2.69562	Halobacteria
GCF_000006805.1	ASM680v1	Complete Genome	2.57101	Halobacteria
GCF_000009185.1	ASM918v1	Complete Genome	3.17936	Halobacteria
GCF_000011085.1	ASM1108v1	Complete Genome	4.27464	Halobacteria
GCF_000022205.1	ASM2220v1	Complete Genome	3.69258	Halobacteria
GCF_000023945.1	ASM2394v1	Complete Genome	3.1168	Halobacteria
GCF_000023965.1	ASM2396v1	Complete Genome	3.33235	Halobacteria
GCF_000025325.1	ASM2532v1	Complete Genome	5.44078	Halobacteria
GCF_000025625.1	ASM2562v1	Complete Genome	4.44364	Halobacteria
GCF_000025685.1	ASM2568v1	Complete Genome	4.0129	Halobacteria
GCF_000026045.1	ASM2604v1	Complete Genome	2.7497	Halobacteria
GCF_000069025.1	ASM6902v1	Complete Genome	2.66878	Halobacteria
GCF_000172995.2	ASM17299v2	Complete Genome	3.94447	Halobacteria
GCF_000187225.1	ASM18722v1	Contig	4.28481	Halobacteria
GCF_000196895.1	ASM19689v1	Complete Genome	3.69865	Halobacteria
GCF_000215915.2	HLRTI_V2	Contig	3.14656	Halobacteria
GCF_000217715.1	ASM21771v1	Complete Genome	4.35527	Halobacteria
GCF_000223905.1	ASM22390v1	Complete Genome	3.89	Halobacteria
GCF_000224475.1	ASM22447v1	Complete Genome	3.64316	Halobacteria
GCF_000226975.2	ASM22697v3	Complete Genome	4.38154	Halobacteria
GCF_000230715.2	ASM23071v3	Complete Genome	3.78836	Halobacteria
GCF_000230735.2	ASM23073v3	Complete Genome	4.3541	Halobacteria
GCF_000230955.2	ASM23095v3	Complete Genome	3.16256	Halobacteria
GCF_000237865.1	ASM23786v1	Complete Genome	3.26048	Halobacteria
GCF_000259215.1	ASM25921v1	Contig	3.38368	Halobacteria
GCF_000281695.1	ASM28169v1	Complete Genome	3.79361	Halobacteria
GCF_000283335.1	162.HSB1.1	Contig	4.49231	Halobacteria
GCF_000296615.1	ASM29661v1	Scaffold	3.16801	Halobacteria
GCF_000306765.2	ASM30676v2	Complete Genome	3.90471	Halobacteria
GCF_000328285.1	Haloferax sp. BAB2207 V.1	Contig	3.74471	Halobacteria
GCF_000328525.1	ASM32852v1	Complete Genome	3.22388	Halobacteria
GCF_000328685.1	ASM32868v1	Complete Genome	4.31412	Halobacteria
GCF_000334895.1	ASM33489v1	Contig	3.47673	Halobacteria
GCF_000336615.1	ASM33661v1	Contig	4.22542	Halobacteria
GCF_000336635.1	ASM33663v1	Contig	4.28036	Halobacteria
GCF_000336655.1	ASM33665v1	Contig	4.33858	Halobacteria
GCF_000336675.1	ASM33667v1	Contig	3.41907	Halobacteria
GCF_000336695.1	ASM33669v1	Contig	2.99156	Halobacteria
GCF_000336715.1	ASM33671v1	Contig	4.05243	Halobacteria
GCF_000336735.1	ASM33673v1	Contig	3.64926	Halobacteria
GCF_000336755.1	ASM33675v1	Contig	3.95214	Halobacteria
GCF_000336775.1	ASM33677v1	Contig	4.05732	Halobacteria
GCF_000336795.1	ASM33679v1	Contig	3.61906	Halobacteria
GCF_000336815.1	ASM33681v1	Contig	3.9988	Halobacteria
GCF_000336835.1	ASM33683v1	Contig	3.59821	Halobacteria
GCF_000336855.1	ASM33685v1	Contig	3.60953	Halobacteria
GCF_000336875.1	ASM33687v1	Contig	3.68287	Halobacteria
GCF_000336895.1	ASM33689v1	Contig	4.14711	Halobacteria
GCF_000336915.1	ASM33691v1	Contig	3.4497	Halobacteria
GCF_000336935.1	ASM33693v1	Contig	4.19978	Halobacteria
GCF_000336955.1	ASM33695v1	Contig	3.69795	Halobacteria
GCF_000336975.1	ASM33697v1	Contig	3.58703	Halobacteria
GCF_000336995.1	ASM33699v1	Contig	3.10853	Halobacteria
GCF_000337015.1	ASM33701v1	Contig	3.3826	Halobacteria
GCF_000337035.1	ASM33703v1	Contig	3.64531	Halobacteria
GCF_000337055.1	ASM33705v1	Contig	3.30737	Halobacteria
GCF_000337075.1	ASM33707v1	Contig	3.03753	Halobacteria
GCF_000337095.1	ASM33709v1	Contig	4.38452	Halobacteria
GCF_000337115.1	ASM33711v1	Contig	3.89527	Halobacteria
GCF_000337135.1	ASM33713v1	Contig	4.30927	Halobacteria
GCF_000337155.1	ASM33715v1	Contig	3.77497	Halobacteria
GCF_000337175.1	ASM33717v1	Contig	4.02369	Halobacteria
GCF_000337195.1	ASM33719v1	Contig	4.1908	Halobacteria
GCF_000337215.1	ASM33721v1	Contig	4.58863	Halobacteria
GCF_000337235.1	ASM33723v1	Contig	4.92684	Halobacteria
GCF_000337255.1	ASM33725v1	Contig	3.61412	Halobacteria
GCF_000337275.1	ASM33727v1	Contig	4.40516	Halobacteria
GCF_000337295.1	ASM33729v1	Contig	3.89454	Halobacteria
GCF_000337315.1	ASM33731v1	Contig	3.86675	Halobacteria
GCF_000337335.1	ASM33733v1	Contig	3.30613	Halobacteria
GCF_000337355.1	ASM33735v1	Contig	3.61974	Halobacteria
GCF_000337375.1	ASM33737v1	Contig	3.42504	Halobacteria
GCF_000337395.1	ASM33739v1	Contig	3.13776	Halobacteria
GCF_000337415.1	ASM33741v1	Contig	3.32886	Halobacteria
GCF_000337435.1	ASM33743v1	Contig	3.37622	Halobacteria
GCF_000337455.1	ASM33745v1	Contig	4.69489	Halobacteria
GCF_000337475.1	ASM33747v1	Contig	3.52203	Halobacteria
GCF_000337495.1	ASM33749v1	Contig	4.84161	Halobacteria
GCF_000337515.1	ASM33751v1	Contig	3.23845	Halobacteria
GCF_000337535.1	ASM33753v1	Contig	4.61836	Halobacteria
GCF_000337555.1	ASM33755v1	Contig	4.40418	Halobacteria
GCF_000337575.1	ASM33757v1	Contig	4.15961	Halobacteria
GCF_000337595.1	ASM33759v1	Contig	4.63519	Halobacteria
GCF_000337615.1	ASM33761v1	Contig	3.91581	Halobacteria
GCF_000337635.1	ASM33763v1	Contig	4.26445	Halobacteria
GCF_000337655.1	ASM33765v1	Contig	3.69403	Halobacteria
GCF_000337675.1	ASM33767v1	Contig	4.41653	Halobacteria
GCF_000337695.1	ASM33769v1	Contig	4.49618	Halobacteria
GCF_000337715.1	ASM33771v1	Contig	4.11128	Halobacteria
GCF_000337735.1	ASM33773v1	Contig	3.46029	Halobacteria
GCF_000337755.1	ASM33775v1	Contig	4.40493	Halobacteria
GCF_000337775.1	ASM33777v1	Contig	3.9232	Halobacteria
GCF_000337795.1	ASM33779v1	Contig	3.82597	Halobacteria
GCF_000337815.1	ASM33781v1	Contig	3.36898	Halobacteria
GCF_000337835.1	ASM33783v1	Contig	3.81243	Halobacteria
GCF_000337855.1	ASM33785v1	Contig	3.92851	Halobacteria
GCF_000337875.1	ASM33787v1	Contig	4.4163	Halobacteria
GCF_000337895.1	ASM33789v1	Contig	3.68875	Halobacteria
GCF_000337915.1	ASM33791v1	Contig	3.4237	Halobacteria
GCF_000376445.1	ASM37644v1	Contig	4.31754	Halobacteria
GCF_000379085.1	ASM37908v1	Scaffold	3.60777	Halobacteria
GCF_000383975.1	ASM38397v1	Scaffold	4.93484	Halobacteria
GCF_000400975.1	ASM40097v1	Contig	2.43176	Halobacteria
GCF_000403645.1	ASM40364v1	Complete Genome	3.25526	Halobacteria
GCF_000415945.1	HX64_HX5_0315125.1	Scaffold	2.04094	Halobacteria
GCF_000415965.1	J07B_scf56329a_trim	Scaffold	3.4755	Halobacteria
GCF_000415985.1	HQW2_08err_032412a	Scaffold	3.59454	Halobacteria
GCF_000416005.1	HQX_031812	Scaffold	3.01991	Halobacteria
GCF_000416025.1	HN6_031912	Scaffold	2.529	Halobacteria
GCF_000416045.1	HR_032012	Scaffold	2.1208	Halobacteria
GCF_000416065.1	HN4_v3_031612	Scaffold	2.88866	Halobacteria
GCF_000416085.1	J07ABselected	Scaffold	2.98294	Halobacteria
GCF_000416105.1	J07AB_HB67select	Scaffold	2.64955	Halobacteria
GCF_000421805.1	ASM42180v1	Contig	3.59148	Halobacteria
GCF_000427685.1	ASM42768v1	Scaffold	3.79793	Halobacteria
GCF_000447865.2	ASM44786v2	Scaffold	2.8809	Halobacteria
GCF_000455345.1	Halgo	Scaffold	3.90636	Halobacteria
GCF_000455365.1	HdjelfamassiliensisIIH2	Scaffold	3.77655	Halobacteria
GCF_000470655.1	HATI1	Complete Genome	3.14616	Halobacteria
GCF_000474235.1	ASM47423v1	Contig	2.62897	Halobacteria
GCF_000485535.1	ASM48553v1	Scaffold	3.6375	Halobacteria
GCF_000493245.1	Nat_J71	Contig	3.66762	Halobacteria
GCF_000495475.1	Htyrrel1.0	Contig	3.67509	Halobacteria
GCF_000504565.1	ASM50456v2	Complete Genome	3.9015	Halobacteria
GCF_000513435.1	HRSP_AJ67	Scaffold	4.22501	Halobacteria
GCF_000517625.1	ASM51762v1	Complete Genome	4.13118	Halobacteria
GCF_000591055.1	ASM59105v1	Complete Genome	2.91257	Halobacteria
GCF_000685635.1	ASM68563v1	Chromosome	3.9067	Halobacteria
GCF_000690595.1	ASM69059v2	Scaffold	3.79434	Halobacteria
GCF_000691505.1	ASM69150v2	Contig	3.17849	Halobacteria
GCF_000700025.1	ASM70002v2	Contig	3.28237	Halobacteria
GCF_000710605.1	HTGA29.1	Contig	4.13162	Halobacteria
GCF_000710615.1	HAPD43.1	Contig	3.92672	Halobacteria
GCF_000723845.1	PRJEB5511_assembly_1	Scaffold	3.89363	Halobacteria
GCF_000730175.1	ASM73017v1	Contig	4.2237	Halobacteria
GCF_000731985.1	ASM73198v1	Contig	3.77413	Halobacteria
GCF_000739555.1	ASM73955v1	Contig	2.955	Halobacteria
GCF_000739575.1	ASM73957v1	Contig	3.85222	Halobacteria
GCF_000739595.1	ASM73959v1	Contig	3.67798	Halobacteria
GCF_000746205.1	ASM74620v1	Scaffold	2.76746	Halobacteria
GCF_000755225.1	ASM75522v1	Contig	3.45149	Halobacteria
GCF_000755245.1	ASM75524v1	Contig	3.76437	Halobacteria
GCF_000784335.1	ASM78433v1	Scaffold	4.3509	Halobacteria
GCF_000815385.1	ASM81538v1	Contig	4.0915	Halobacteria
GCF_000827835.1	ASM82783v1	Complete Genome	4.22505	Halobacteria
GCF_001011115.1	ASM101111v1	Complete Genome	2.20974	Halobacteria
GCF_001190965.1	ASM119096v1	Complete Genome	3.91845	Halobacteria
GCF_001261915.1	Halorubrum SD626R	Scaffold	3.24871	Halobacteria
GCF_001280425.1	ASM128042v1	Contig	3.97099	Halobacteria
GCF_001280455.1	ASM128045v1	Contig	3.56702	Halobacteria
GCF_001282785.1	halo7	Contig	2.83586	Halobacteria
GCF_001305655.1	ASM130565v1	Complete Genome	2.2535	Halobacteria
GCF_001307315.1	Halpeg_cdk2_1	Contig	2.97254	Halobacteria
GCF_001316185.1	ASM131618v1	Contig	3.89306	Halobacteria
GCF_001368915.1	PRJEB5949_assembly_1	Scaffold	4.01518	Halobacteria
GCF_001462205.1	HalopeDYS1.0	Scaffold	3.24305	Halobacteria
GCF_001469865.1	ASM146986v1	Contig	3.83076	Halobacteria
GCF_001469875.2	ASM146987v2	Scaffold	3.90498	Halobacteria
GCF_001469955.1	ASM146995v1	Contig	3.92956	Halobacteria
GCF_001482285.1	ASM148228v1	Scaffold	3.97756	Halobacteria
GCF_001483125.1	ASM148312v1	Contig	2.9509	Halobacteria
GCF_001485535.1	ASM148553v1	Contig	3.01281	Halobacteria
GCF_001485555.1	ASM148555v1	Contig	4.18459	Halobacteria
GCF_001485575.1	ASM148557v1	Contig	4.35926	Halobacteria
GCF_001488575.1	Halobacterium hubeiense JI20-1	Complete Genome	3.13035	Halobacteria
GCF_001542905.1	ASM154290v1	Contig	3.32577	Halobacteria
GCF_001593955.1	ASM159395v1	Contig	3.98041	Halobacteria
GCF_001625445.1	ASM162544v1	Contig	4.89669	Halobacteria
GCF_001647155.1	ASM164715v1	Scaffold	4.3318	Halobacteria
GCF_001723155.1	ASM172315v1	Contig	5.19257	Halobacteria
GCF_001767315.1	ASM176731v1	Complete Genome	1.97228	Halobacteria
GCF_001861355.1	ASM186135v1	Contig	4.58084	Halobacteria
GCF_001886955.1	ASM188695v1	Complete Genome	2.08595	Halobacteria
GCF_001950595.1	ASM195059v1	Contig	2.57436	Halobacteria
GCF_001953745.1	ASM195374v1	Contig	3.98062	Halobacteria
GCF_001971705.1	ASM197170v1	Complete Genome	3.8358	Halobacteria
GCF_001989615.1	ASM198961v1	Complete Genome	3.77899	Halobacteria
GCF_002025255.2	ASM202525v2	Complete Genome	3.46533	Halobacteria
GCF_002114285.1	ASM211428v1	Contig	3.60355	Halobacteria
GCF_002135005.1	ASM213500v1	Scaffold	3.30813	Halobacteria
GCF_002135045.1	ASM213504v1	Scaffold	3.14599	Halobacteria
GCF_002156705.1	ASM215670v1	Complete Genome	3.93055	Halobacteria
GCF_002177135.1	ASM217713v1	Contig	3.9143	Halobacteria
GCF_002215285.1	ASM221528v1	Scaffold	3.27855	Halobacteria
GCF_002215305.1	ASM221530v1	Contig	3.63375	Halobacteria
GCF_002252725.1	ASM225272v1	Scaffold	3.70247	Halobacteria
GCF_002252735.1	ASM225273v1	Scaffold	4.64804	Halobacteria
GCF_002252745.1	ASM225274v1	Contig	2.97057	Halobacteria
GCF_002252755.1	ASM225275v1	Scaffold	3.81132	Halobacteria
GCF_002252805.1	ASM225280v1	Scaffold	3.35296	Halobacteria
GCF_002252815.1	ASM225281v1	Contig	3.34623	Halobacteria
GCF_002252835.1	ASM225283v1	Scaffold	3.54572	Halobacteria
GCF_002252865.1	ASM225286v1	Contig	2.1124	Halobacteria
GCF_002252875.1	ASM225287v1	Scaffold	3.27496	Halobacteria
GCF_002252895.1	ASM225289v1	Scaffold	3.6267	Halobacteria
GCF_002252925.1	ASM225292v1	Scaffold	3.74217	Halobacteria
GCF_002252965.1	ASM225296v1	Scaffold	3.92673	Halobacteria
GCF_002252985.1	ASM225298v1	Scaffold	3.32012	Halobacteria
GCF_002286985.1	ASM228698v1	Contig	3.50665	Halobacteria
GCF_002355635.1	ASM235563v1	Complete Genome	3.10594	Halobacteria
GCF_002355655.1	ASM235565v1	Complete Genome	3.0802	Halobacteria
GCF_002379115.1	ASM237911v1	Contig	3.66542	Halobacteria
GCF_002494345.1	ASM249434v1	Contig	4.47632	Halobacteria
GCF_002572525.1	ASM257252v1	Contig	5.05806	Halobacteria
GCF_002727095.1	ASM272709v1	Scaffold	3.8611	Halobacteria
GCF_002727125.1	ASM272712v1	Scaffold	3.57835	Halobacteria
GCF_002788215.1	ASM278821v1	Complete Genome	3.33202	Halobacteria
GCF_002844195.1	ASM284419v1	Scaffold	4.6154	Halobacteria
GCF_002844335.1	ASM284433v1	Complete Genome	3.72171	Halobacteria
GCF_002855455.1	ASM285545v1	Contig	3.69531	Halobacteria
GCF_002906575.1	ASM290657v1	Complete Genome	4.97312	Halobacteria
GCF_002952775.1	ASM295277v1	Complete Genome	3.31312	Halobacteria
GCF_003058365.1	ASM305836v1	Complete Genome	2.72312	Halobacteria
GCF_003287355.1	ASM328735v1	Contig	3.58493	Halobacteria
GCF_003298465.1	ASM329846v1	Contig	5.60538	Halobacteria
GCF_003336245.1	ASM333624v1	Contig	3.5491	Halobacteria
GCF_003342675.1	ASM334267v1	Complete Genome	3.77364	Halobacteria
GCF_003342695.1	ASM334269v1	Complete Genome	3.52933	Halobacteria
GCF_003344565.1	ASM334456v1	Contig	4.60607	Halobacteria
GCF_003351065.1	ASM335106v1	Scaffold	3.879	Halobacteria
GCF_003369835.1	ASM336983v1	Contig	4.37218	Halobacteria
GCF_003382685.1	ASM338268v1	Scaffold	3.83832	Halobacteria
GCF_003382985.1	ASM338298v1	Contig	4.01965	Halobacteria
GCF_003383005.1	ASM338300v1	Contig	3.8842	Halobacteria
GCF_003383015.1	ASM338301v1	Contig	3.62017	Halobacteria
GCF_003383025.1	ASM338302v1	Scaffold	4.17621	Halobacteria
GCF_003383065.1	ASM338306v1	Contig	3.81356	Halobacteria
GCF_003383085.1	ASM338308v1	Contig	3.93822	Halobacteria
GCF_003383095.1	ASM338309v1	Contig	4.01208	Halobacteria
GCF_003383195.1	ASM338319v1	Contig	4.36621	Halobacteria
GCF_003430805.1	ASM343080v1	Complete Genome	3.85343	Halobacteria
GCF_003430825.1	ASM343082v1	Complete Genome	3.78932	Halobacteria
GCF_003439925.1	ASM343992v1	Contig	3.47334	Halobacteria
GCF_003586325.1	ASM358632v1	Scaffold	4.26135	Halobacteria
GCF_003602035.1	ASM360203v1	Contig	3.87336	Halobacteria
GCF_003605575.1	ASM360557v1	Scaffold	2.46839	Halobacteria
GCF_003605635.1	ASM360563v1	Contig	3.00969	Halobacteria
GCF_003610195.1	ASM361019v1	Scaffold	4.86523	Halobacteria
GCF_003634715.1	ASM363471v1	Contig	4.45915	Halobacteria
GCF_003665865.1	ASM366586v1	Contig	3.87937	Halobacteria
GCF_003665885.1	ASM366588v1	Contig	4.19145	Halobacteria
GCF_003665905.1	ASM366590v1	Contig	3.88855	Halobacteria
GCF_003665925.1	ASM366592v1	Contig	3.87139	Halobacteria
GCF_003665935.1	ASM366593v1	Contig	3.54807	Halobacteria
GCF_003665955.1	ASM366595v1	Contig	3.50679	Halobacteria
GCF_003665985.1	ASM366598v1	Contig	4.13314	Halobacteria
GCF_003666005.1	ASM366600v1	Contig	3.90935	Halobacteria
GCF_003666015.1	ASM366601v1	Contig	4.14043	Halobacteria
GCF_003666025.1	ASM366602v1	Contig	3.30715	Halobacteria
GCF_003666065.1	ASM366606v1	Contig	4.54443	Halobacteria
GCF_003670115.1	ASM367011v1	Contig	4.66568	Halobacteria
GCF_003675855.1	ASM367585v1	Contig	3.73552	Halobacteria
GCF_003675875.1	ASM367587v1	Scaffold	4.11701	Halobacteria
GCF_003688715.1	ASM368871v1	Scaffold	3.50731	Halobacteria
GCF_003697815.1	ASM369781v1	Scaffold	3.61003	Halobacteria
GCF_003697845.1	ASM369784v1	Scaffold	3.59298	Halobacteria
GCF_003721175.2	ASM372117v2	Complete Genome	3.17588	Halobacteria
GCF_003721435.2	ASM372143v2	Complete Genome	3.58228	Halobacteria
GCF_003722095.1	ASM372209v1	Contig	2.66102	Halobacteria
GCF_003730195.1	ASM373019v1	Contig	5.07289	Halobacteria
GCF_003781945.1	ASM378194v1	Contig	3.71546	Halobacteria
GCF_003841465.1	ASM384146v1	Contig	4.61448	Halobacteria
GCF_003841485.1	ASM384148v1	Contig	3.51122	Halobacteria
GCF_003841505.1	ASM384150v1	Contig	4.56649	Halobacteria
GCF_003856835.1	ASM385683v1	Complete Genome	3.50309	Halobacteria
GCF_003862495.1	ASM386249v1	Contig	3.65469	Halobacteria
GCF_003977755.1	ASM397775v1	Scaffold	4.9607	Halobacteria
GCF_003990725.2	ASM399072v2	Complete Genome	3.04447	Halobacteria
GCF_003992375.1	ASM399237v1	Contig	3.31667	Halobacteria
GCF_003992425.1	ASM399242v1	Contig	4.11183	Halobacteria
GCF_004015825.1	ASM401582v1	Scaffold	3.75751	Halobacteria
GCF_004087835.1	ASM408783v1	Complete Genome	3.49092	Halobacteria
GCF_004114375.1	ASM411437v1	Complete Genome	3.66843	Halobacteria
GCF_004114995.1	ASM411499v1	Scaffold	3.63076	Halobacteria
GCF_004116405.1	ASM411640v1	Contig	4.89113	Halobacteria
GCF_004118325.1	ASM411832v1	Scaffold	4.08767	Halobacteria
GCF_004126515.1	ASM412651v1	Complete Genome	3.7263	Halobacteria
GCF_004143485.2	ASM414348v2	Scaffold	3.77926	Halobacteria
GCF_004150385.1	ASM415038v1	Scaffold	3.58983	Halobacteria
GCF_004150395.1	ASM415039v1	Scaffold	4.00178	Halobacteria
GCF_004209855.1	ASM420985v1	Scaffold	3.66608	Halobacteria
GCF_004217335.1	ASM421733v1	Contig	4.25655	Halobacteria
GCF_004521895.1	ASM452189v1	Contig	3.61966	Halobacteria
GCF_004681185.1	ASM468118v1	Scaffold	5.03856	Halobacteria
GCF_004698125.1	ASM469812v1	Scaffold	4.46737	Halobacteria
GCF_004762015.1	ASM476201v1	Contig	3.86856	Halobacteria
GCF_004765785.1	ASM476578v1	Scaffold	4.31831	Halobacteria
GCF_004765795.1	ASM476579v1	Scaffold	3.76372	Halobacteria
GCF_004765805.1	ASM476580v1	Scaffold	3.93395	Halobacteria
GCF_004765815.2	ASM476581v2	Scaffold	4.75324	Halobacteria
GCF_004785955.1	ASM478595v1	Scaffold	3.74523	Halobacteria
GCF_004799605.1	ASM479960v1	Complete Genome	2.42968	Halobacteria
GCF_004799625.1	ASM479962v1	Complete Genome	4.90498	Halobacteria
GCF_004799645.1	ASM479964v1	Complete Genome	4.38241	Halobacteria
GCF_004799665.1	ASM479966v1	Complete Genome	3.45206	Halobacteria
GCF_004799685.1	ASM479968v1	Complete Genome	3.74989	Halobacteria
GCF_004803735.1	ASM480373v1	Complete Genome	3.31606	Halobacteria
GCF_004916935.1	ASM491693v1	Contig	4.40389	Halobacteria
GCF_004916945.1	ASM491694v1	Contig	4.41308	Halobacteria
GCF_004944975.1	ASM494497v1	Scaffold	3.46493	Halobacteria
GCF_005049285.1	ASM504928v1	Contig	3.66113	Halobacteria
GCF_005155585.1	ASM515558v1	Complete Genome	3.0517	Halobacteria
GCF_005239135.1	ASM523913v1	Contig	2.90442	Halobacteria
GCF_005239175.1	ASM523917v1	Scaffold	3.35967	Halobacteria
GCF_005239425.1	ASM523942v1	Scaffold	4.74282	Halobacteria
GCF_005239435.1	ASM523943v1	Scaffold	5.15461	Halobacteria
GCF_005310945.1	ASM531094v1	Complete Genome	4.18492	Halobacteria
GCF_005406125.1	ASM540612v1	Contig	4.21727	Halobacteria
GCF_005406325.1	ASM540632v1	Complete Genome	3.90747	Halobacteria
GCF_005435015.1	ASM543501v1	Scaffold	3.65072	Halobacteria
GCF_005435025.1	ASM543502v1	Scaffold	3.60532	Halobacteria
GCF_005435035.1	ASM543503v1	Scaffold	3.7344	Halobacteria
GCF_005435055.1	ASM543505v1	Scaffold	3.62994	Halobacteria
GCF_005435095.1	ASM543509v1	Scaffold	3.52066	Halobacteria
GCF_005435115.1	ASM543511v1	Contig	3.32569	Halobacteria
GCF_005435135.1	ASM543513v1	Scaffold	3.6227	Halobacteria
GCF_005435165.1	ASM543516v1	Contig	3.32121	Halobacteria
GCF_005435175.1	ASM543517v1	Scaffold	3.4793	Halobacteria
GCF_005435185.1	ASM543518v1	Scaffold	5.82283	Halobacteria
GCF_005435195.1	ASM543519v1	Scaffold	3.40661	Halobacteria
GCF_005435225.1	ASM543522v1	Contig	3.37818	Halobacteria
GCF_005435235.1	ASM543523v1	Contig	3.61285	Halobacteria
GCF_005543295.1	ASM554329v1	Scaffold	3.41621	Halobacteria
GCF_005576615.1	ASM557661v1	Complete Genome	4.67447	Halobacteria
GCF_005890195.1	ASM589019v1	Complete Genome	3.77809	Halobacteria
GCF_005938085.1	ASM593808v1	Contig	4.26302	Halobacteria
GCF_005954745.1	ASM595474v1	Complete Genome	3.94245	Halobacteria
GCF_006543045.1	ASM654304v1	Scaffold	4.52154	Halobacteria
GCF_006861655.1	ASM686165v1	Scaffold	2.56434	Halobacteria
GCF_006861665.1	ASM686166v1	Scaffold	2.84144	Halobacteria
GCF_007004735.1	ASM700473v1	Scaffold	4.1968	Halobacteria
GCF_007421925.1	ASM742192v1	Scaffold	4.00436	Halobacteria
GCF_007655485.1	ASM765548v1	Scaffold	3.35154	Halobacteria
GCF_007671685.1	ASM767168v1	Scaffold	3.67496	Halobacteria
GCF_007671725.1	ASM767172v1	Contig	3.18286	Halobacteria
GCF_007714225.1	ASM771422v1	Contig	3.78434	Halobacteria
GCF_007833275.1	ASM783327v1	Complete Genome	2.52337	Halobacteria
GCF_007896465.1	ASM789646v1	Contig	4.89392	Halobacteria
GCF_008122205.1	ASM812220v1	Contig	5.31681	Halobacteria
GCF_008124605.1	ASM812460v1	Contig	2.36491	Halobacteria
GCF_008245225.1	ASM824522v1	Contig	4.20149	Halobacteria
GCF_008728975.1	ASM872897v1	Contig	4.33459	Halobacteria
GCF_008729005.1	ASM872900v1	Contig	3.999	Halobacteria
GCF_008729015.1	ASM872901v1	Contig	4.04855	Halobacteria
GCF_008729095.1	ASM872909v1	Contig	3.89689	Halobacteria
GCF_008806815.1	ASM880681v1	Contig	3.56169	Halobacteria
GCF_008806895.1	ASM880689v1	Contig	3.25527	Halobacteria
GCF_008806905.1	ASM880690v1	Contig	3.4807	Halobacteria
GCF_008806915.1	ASM880691v1	Contig	3.48711	Halobacteria
GCF_008831545.1	ASM883154v1	Complete Genome	4.45073	Halobacteria
GCF_009176545.1	ASM917654v1	Contig	4.69083	Halobacteria
GCF_009184545.1	ASM918454v1	Scaffold	2.6606	Halobacteria
GCF_009184555.1	ASM918455v1	Contig	2.43505	Halobacteria
GCF_009184575.1	ASM918457v1	Scaffold	2.42211	Halobacteria
GCF_009217585.1	ASM921758v1	Complete Genome	3.0942	Halobacteria
GCF_009392895.1	ASM939289v1	Complete Genome	4.34848	Halobacteria
GCF_009617995.1	ASM961799v1	Complete Genome	3.32903	Halobacteria
GCF_009663395.1	ASM966339v1	Scaffold	2.76822	Halobacteria
GCF_009674585.1	ASM967458v1	Contig	3.48711	Halobacteria
GCF_009674605.1	ASM967460v1	Contig	3.56169	Halobacteria
GCF_009674625.1	ASM967462v1	Contig	3.4807	Halobacteria
GCF_009690625.1	ASM969062v1	Complete Genome	2.62839	Halobacteria
GCF_009741785.1	ASM974178v1	Contig	3.79862	Halobacteria
GCF_009741825.1	ASM974182v1	Contig	2.96502	Halobacteria
GCF_009741925.1	ASM974192v1	Contig	3.45203	Halobacteria
GCF_009741955.1	ASM974195v1	Contig	4.09566	Halobacteria
GCF_009741975.1	ASM974197v1	Contig	2.73087	Halobacteria
GCF_009742825.1	ASM974282v1	Contig	3.23017	Halobacteria
GCF_009762275.1	ASM976227v1	Complete Genome	3.5603	Halobacteria
GCF_009789175.1	ASM978917v1	Complete Genome	3.73236	Halobacteria
GCF_009791395.1	ASM979139v1	Contig	4.06971	Halobacteria
GCF_009797925.1	ASM979792v1	Contig	2.61766	Halobacteria
GCF_009806985.1	ASM980698v1	Scaffold	3.10882	Halobacteria
GCF_009807105.1	ASM980710v1	Scaffold	4.16263	Halobacteria
GCF_009831455.1	ASM983145v1	Contig	3.36902	Halobacteria
GCF_009831555.1	ASM983155v1	Contig	3.49948	Halobacteria
GCF_009831575.1	ASM983157v1	Contig	3.24592	Halobacteria
GCF_009831625.1	ASM983162v1	Contig	3.77577	Halobacteria
GCF_009834785.1	ASM983478v1	Scaffold	4.55677	Halobacteria
GCF_009856205.1	ASM985620v1	Contig	3.37964	Halobacteria
GCF_009856455.1	ASM985645v1	Contig	3.20793	Halobacteria
GCF_009900715.1	ASM990071v1	Scaffold	3.52198	Halobacteria
GCF_010092465.1	ASM1009246v1	Complete Genome	2.89061	Halobacteria
GCF_010119195.1	ASM1011919v1	Scaffold	3.7881	Halobacteria
GCF_010119205.1	ASM1011920v1	Contig	3.90668	Halobacteria
GCF_010692885.1	ASM1069288v1	Complete Genome	3.99432	Halobacteria
GCF_010692905.1	ASM1069290v1	Complete Genome	3.70698	Halobacteria
GCF_010747475.1	ASM1074747v1	Contig	4.40856	Halobacteria
GCF_011043775.1	ASM1104377v1	Contig	4.56299	Halobacteria
GCF_011440255.1	ASM1144025v1	Scaffold	4.52868	Halobacteria
GCF_011440285.1	ASM1144028v1	Contig	4.117	Halobacteria
GCF_011440375.1	ASM1144037v1	Scaffold	3.76446	Halobacteria
GCF_011440385.1	ASM1144038v1	Contig	4.37218	Halobacteria
GCF_011602445.1	ASM1160244v1	Complete Genome	4.93083	Halobacteria
GCF_011627345.1	ASM1162734v1	Scaffold	3.1615	Halobacteria
GCF_011627385.1	ASM1162738v1	Contig	4.11183	Halobacteria
GCF_011734195.1	ASM1173419v1	Contig	2.98309	Halobacteria
GCF_011765365.1	ASM1176536v1	Complete Genome	2.81855	Halobacteria
GCF_012163165.1	ASM1216316v1	Scaffold	4.05165	Halobacteria
GCF_012726095.1	ASM1272609v1	Scaffold	3.39584	Halobacteria
GCF_012726105.1	ASM1272610v1	Scaffold	3.66966	Halobacteria
GCF_012726115.1	ASM1272611v1	Scaffold	4.01327	Halobacteria
GCF_012726155.1	ASM1272615v1	Scaffold	3.92899	Halobacteria
GCF_013267195.1	ASM1326719v1	Complete Genome	3.34025	Halobacteria
GCF_013342135.1	ASM1334213v1	Contig	4.99457	Halobacteria
GCF_013342145.1	ASM1334214v1	Contig	4.55201	Halobacteria
GCF_013342525.1	ASM1334252v1	Contig	3.19381	Halobacteria
GCF_013391085.1	ASM1339108v1	Complete Genome	3.21168	Halobacteria
GCF_013391105.1	ASM1339110v1	Complete Genome	3.74657	Halobacteria
GCF_013391635.1	ASM1339163v1	Contig	3.37713	Halobacteria
GCF_013401515.1	ASM1340151v1	Complete Genome	4.27796	Halobacteria
GCF_013402815.2	ASM1340281v2	Complete Genome	4.84219	Halobacteria
GCF_013402875.1	ASM1340287v1	Complete Genome	4.25875	Halobacteria
GCF_013415885.1	ASM1341588v1	Complete Genome	4.48015	Halobacteria
GCF_013415905.1	ASM1341590v1	Complete Genome	5.19903	Halobacteria
GCF_013456555.2	ASM1345655v2	Complete Genome	5.33631	Halobacteria
GCF_013839425.1	ASM1383942v1	Scaffold	2.85981	Halobacteria
GCF_013839515.1	ASM1383951v1	Scaffold	2.77952	Halobacteria
GCF_014202515.1	ASM1420251v1	Contig	2.36896	Halobacteria
GCF_014212355.1	ASM1421235v1	Contig	3.4904	Halobacteria
GCF_014530665.1	ASM1453066v1	Scaffold	3.77809	Halobacteria
GCF_014635105.1	ASM1463510v1	Contig	3.87888	Halobacteria
GCF_014646875.1	ASM1464687v1	Scaffold	3.06752	Halobacteria
GCF_014647095.1	ASM1464709v1	Contig	3.77473	Halobacteria
GCF_014647115.1	ASM1464711v1	Contig	2.81354	Halobacteria
GCF_014647155.1	ASM1464715v1	Contig	3.14119	Halobacteria
GCF_014647235.1	ASM1464723v1	Contig	3.96141	Halobacteria
GCF_014647415.1	ASM1464741v1	Scaffold	4.17022	Halobacteria
GCF_014647455.2	ASM1464745v2	Scaffold	3.02467	Halobacteria
GCF_014647475.1	ASM1464747v1	Contig	3.38035	Halobacteria
GCF_014969745.1	ASM1496974v1	Complete Genome	3.99624	Halobacteria
GCF_016065055.1	ASM1606505v1	Complete Genome	4.15805	Halobacteria
GCF_016635065.1	ASM1663506v1	Contig	3.30121	Halobacteria
GCF_016906025.1	ASM1690602v1	Complete Genome	5.08724	Halobacteria
GCF_016917835.2	ASM1691783v3	Complete Genome	2.44737	Halobacteria
GCF_016917855.1	ASM1691785v1	Complete Genome	2.32622	Halobacteria
GCF_017094445.1	ASM1709444v1	Complete Genome	3.07802	Halobacteria
GCF_017094465.1	ASM1709446v1	Complete Genome	2.88038	Halobacteria
GCF_017094485.1	ASM1709448v1	Complete Genome	3.04113	Halobacteria
GCF_017094505.1	ASM1709450v1	Complete Genome	2.94034	Halobacteria
GCF_017094525.1	ASM1709452v1	Complete Genome	2.89391	Halobacteria
GCF_017352095.1	ASM1735209v1	Complete Genome	3.58887	Halobacteria
GCF_017352155.2	ASM1735215v2	Complete Genome	4.27069	Halobacteria
GCF_017357405.1	ASM1735740v1	Complete Genome	5.1666	Halobacteria
GCF_017612575.1	ASM1761257v1	Scaffold	3.36741	Halobacteria
GCF_017873555.1	ASM1787355v1	Contig	3.08099	Halobacteria
GCF_017873775.1	ASM1787377v1	Contig	2.81594	Halobacteria
GCF_017873815.1	ASM1787381v1	Contig	3.09817	Halobacteria
GCF_017874235.1	ASM1787423v1	Contig	2.75232	Halobacteria
GCF_017874695.1	ASM1787469v1	Contig	3.12271	Halobacteria
GCF_018200015.1	ASM1820001v1	Complete Genome	4.53713	Halobacteria
GCF_018228765.1	ASM1822876v1	Complete Genome	3.02182	Halobacteria
GCF_018419995.1	ASM1841999v1	Contig	3.93958	Halobacteria
GCF_018420015.1	ASM1842001v1	Contig	3.94015	Halobacteria
GCF_018420055.1	ASM1842005v1	Contig	3.94003	Halobacteria
GCF_018420065.1	ASM1842006v1	Contig	3.93656	Halobacteria
GCF_018623055.1	ASM1862305v1	Complete Genome	3.06352	Halobacteria
GCF_019061225.1	ASM1906122v1	Contig	3.79862	Halobacteria
GCF_019061235.1	ASM1906123v1	Contig	3.9048	Halobacteria
GCF_019599405.1	ASM1959940v1	Scaffold	4.02725	Halobacteria
GCF_019599465.1	ASM1959946v1	Contig	4.66706	Halobacteria
GCF_019599485.1	ASM1959948v1	Scaffold	4.06725	Halobacteria
GCF_019599505.1	ASM1959950v1	Contig	5.19519	Halobacteria
GCF_019599515.1	ASM1959951v1	Contig	3.92628	Halobacteria
GCF_019693215.1	ASM1969321v1	Complete Genome	2.65668	Halobacteria
GCF_019823105.1	ASM1982310v1	Complete Genome	3.73245	Halobacteria
GCF_019879105.1	ASM1987910v1	Complete Genome	5.67467	Halobacteria
GCF_019880225.1	ASM1988022v1	Complete Genome	3.05805	Halobacteria
GCF_019880245.1	ASM1988024v1	Complete Genome	3.7199	Halobacteria
GCF_020097815.1	ASM2009781v1	Complete Genome	3.42175	Halobacteria
GCF_020097835.1	ASM2009783v1	Complete Genome	3.94713	Halobacteria
GCF_020105915.1	ASM2010591v1	Scaffold	4.12534	Halobacteria
GCF_020150815.1	ASM2015081v1	Complete Genome	3.72771	Halobacteria
GCF_020177165.1	ASM2017716v1	Contig	4.52891	Halobacteria
GCF_020177375.1	ASM2017737v1	Contig	4.53347	Halobacteria
GCF_020217425.1	ASM2021742v1	Complete Genome	4.2547	Halobacteria
GCF_020405185.1	ASM2040518v1	Complete Genome	3.84647	Halobacteria
GCF_020405205.1	ASM2040520v1	Complete Genome	4.7042	Halobacteria
GCF_020405225.1	ASM2040522v1	Complete Genome	5.09732	Halobacteria
GCF_020405245.1	ASM2040524v1	Complete Genome	4.14655	Halobacteria
GCF_020515625.1	ASM2051562v1	Contig	4.71011	Halobacteria
GCF_020567425.1	ASM2056742v1	Contig	4.05525	Halobacteria
GCF_020567525.1	ASM2056752v1	Contig	4.06518	Halobacteria
GCF_020614375.1	ASM2061437v1	Complete Genome	5.03526	Halobacteria
GCF_020614395.1	ASM2061439v1	Complete Genome	2.33928	Halobacteria
GCF_020618475.1	ASM2061847v1	Complete Genome	7.27939	Halobacteria
GCF_020700235.1	ASM2070023v1	Complete Genome	6.27052	Halobacteria
GCF_020736485.1	ASM2073648v1	Complete Genome	2.29104	Halobacteria
GCF_021028995.1	ASM2102899v1	Contig	3.33691	Halobacteria
GCF_021029015.1	ASM2102901v1	Contig	3.49203	Halobacteria
GCF_021083305.1	ASM2108330v1	Contig	5.68225	Halobacteria
GCF_021233415.1	ASM2123341v1	Complete Genome	2.709	Halobacteria
GCF_021233435.1	ASM2123343v1	Complete Genome	3.3168	Halobacteria
GCF_021249345.1	ASM2124934v1	Complete Genome	3.11219	Halobacteria
GCF_021249405.1	ASM2124940v1	Complete Genome	2.82888	Halobacteria
GCF_021431925.1	ASM2143192v1	Complete Genome	3.32012	Halobacteria
GCF_021503975.1	ASM2150397v1	Contig	2.46699	Halobacteria
GCF_021503995.1	ASM2150399v1	Scaffold	2.05978	Halobacteria
GCF_021504015.1	ASM2150401v1	Contig	2.23647	Halobacteria
GCF_021504035.1	ASM2150403v1	Contig	2.42856	Halobacteria
GCF_021504045.1	ASM2150404v1	Contig	2.43269	Halobacteria
GCF_021729015.1	ASM2172901v1	Contig	3.06574	Halobacteria
GCF_021963785.1	ASM2196378v1	Contig	3.03749	Halobacteria
GCF_021965275.1	ASM2196527v1	Contig	3.55049	Halobacteria
GCF_022807515.1	ASM2280751v1	Scaffold	3.58983	Halobacteria
GCF_022869805.1	ASM2286980v1	Complete Genome	5.05868	Halobacteria
GCF_022870485.1	ASM2287048v1	Complete Genome	3.96547	Halobacteria
GCF_023008545.1	ASM2300854v1	Complete Genome	4.61164	Halobacteria
GCF_023008565.1	ASM2300856v1	Complete Genome	4.39468	Halobacteria
GCF_023008585.1	ASM2300858v1	Complete Genome	4.35251	Halobacteria
GCF_023028105.1	ASM2302810v1	Complete Genome	4.75788	Halobacteria
GCF_023028225.1	ASM2302822v1	Complete Genome	3.21408	Halobacteria
GCF_023028345.1	ASM2302834v1	Complete Genome	4.75414	Halobacteria
GCF_023074835.1	ASM2307483v1	Contig	4.46194	Halobacteria
GCF_023077655.1	ASM2307765v1	Contig	4.59805	Halobacteria
GCF_023093535.1	ASM2309353v1	Complete Genome	3.89482	Halobacteria
GCF_023115355.1	ASM2311535v1	Complete Genome	4.01225	Halobacteria
GCF_023204835.1	ASM2320483v1	Chromosome	3.16963	Halobacteria
GCF_023238205.1	ASM2323820v1	Complete Genome	4.62494	Halobacteria
GCF_023238445.1	ASM2323844v1	Complete Genome	3.66837	Halobacteria
GCF_023276355.1	ASM2327635v1	Contig	2.94151	Halobacteria
GCF_023276375.1	ASM2327637v1	Contig	5.31776	Halobacteria
GCF_023566035.1	ASM2356603v1	Contig	3.66113	Halobacteria
GCF_023566055.1	ASM2356605v1	Contig	4.59454	Halobacteria
GCF_023638035.1	ASM2363803v1	Contig	3.26064	Halobacteria
GCF_023638055.1	ASM2363805v1	Scaffold	3.28972	Halobacteria
GCF_023698535.1	ASM2369853v1	Contig	4.03195	Halobacteria
GCF_023699475.1	ASM2369947v1	Scaffold	4.06849	Halobacteria
GCF_023702125.1	ASM2370212v1	Complete Genome	3.06342	Halobacteria
GCF_023703775.1	ASM2370377v1	Complete Genome	3.43599	Halobacteria
GCF_023703795.1	ASM2370379v1	Complete Genome	3.83989	Halobacteria
GCF_023913515.1	ASM2391351v1	Complete Genome	4.74342	Halobacteria
GCF_023973145.1	ASM2397314v1	Complete Genome	3.83667	Halobacteria
GCF_024136965.1	ASM2413696v1	Contig	4.8247	Halobacteria
GCF_024136975.1	ASM2413697v1	Contig	4.86013	Halobacteria
GCF_024136985.1	ASM2413698v1	Contig	3.96636	Halobacteria
GCF_024138125.1	ASM2413812v1	Complete Genome	3.59652	Halobacteria
GCF_024138145.1	ASM2413814v1	Complete Genome	3.8546	Halobacteria
GCF_024138165.1	ASM2413816v1	Complete Genome	5.05107	Halobacteria
GCF_024178165.1	ASM2417816v1	Contig	3.04123	Halobacteria
GCF_024204665.1	ASM2420466v1	Complete Genome	4.31216	Halobacteria
GCF_024218775.1	ASM2421877v1	Complete Genome	3.73965	Halobacteria
GCF_024218795.1	ASM2421879v1	Complete Genome	4.73943	Halobacteria
GCF_024218815.1	ASM2421881v1	Complete Genome	3.91018	Halobacteria
GCF_024227435.1	ASM2422743v1	Complete Genome	4.77136	Halobacteria
GCF_024227715.1	ASM2422771v1	Complete Genome	3.88495	Halobacteria
GCF_024228315.1	ASM2422831v1	Complete Genome	4.60176	Halobacteria
GCF_024266705.1	ASM2426670v1	Complete Genome	5.44358	Halobacteria
GCF_024296665.1	ASM2429666v1	Complete Genome	3.62256	Halobacteria
GCF_024296685.1	ASM2429668v1	Complete Genome	3.766	Halobacteria
GCF_024298825.1	ASM2429882v1	Complete Genome	4.19038	Halobacteria
GCF_024298845.1	ASM2429884v1	Complete Genome	4.21755	Halobacteria
GCF_024298865.1	ASM2429886v1	Complete Genome	4.39933	Halobacteria
GCF_024298885.1	ASM2429888v1	Complete Genome	4.44569	Halobacteria
GCF_024298905.1	ASM2429890v1	Complete Genome	3.99356	Halobacteria
GCF_024300625.1	ASM2430062v1	Complete Genome	3.70063	Halobacteria
GCF_024300825.1	ASM2430082v1	Complete Genome	3.65228	Halobacteria
GCF_024362405.1	ASM2436240v1	Complete Genome	4.16763	Halobacteria
GCF_024362485.1	ASM2436248v1	Complete Genome	4.20867	Halobacteria
GCF_024362525.1	ASM2436252v1	Complete Genome	3.9861	Halobacteria
GCF_024449025.1	ASM2444902v1	Scaffold	3.21435	Halobacteria
GCF_024464185.1	ASM2446418v1	Contig	3.85106	Halobacteria
GCF_024464595.1	ASM2446459v1	Contig	3.85723	Halobacteria
GCF_024464655.1	ASM2446465v1	Contig	3.40819	Halobacteria
GCF_024494565.1	ASM2449456v1	Contig	3.4447	Halobacteria
GCF_024494575.1	ASM2449457v1	Contig	2.72753	Halobacteria
GCF_024494595.1	ASM2449459v1	Contig	3.65514	Halobacteria
GCF_024494645.1	ASM2449464v1	Contig	3.81033	Halobacteria
GCF_024494655.1	ASM2449465v1	Contig	3.62188	Halobacteria
GCF_024494685.1	ASM2449468v1	Contig	3.22715	Halobacteria
GCF_024494695.1	ASM2449469v1	Contig	4.03256	Halobacteria
GCF_024494725.1	ASM2449472v1	Contig	3.27591	Halobacteria
GCF_024495425.1	ASM2449542v1	Contig	4.04932	Halobacteria
GCF_024498175.1	ASM2449817v1	Complete Genome	3.45091	Halobacteria
GCF_024498195.1	ASM2449819v1	Complete Genome	3.90276	Halobacteria
GCF_024498335.1	ASM2449833v1	Complete Genome	2.85396	Halobacteria
GCF_024508235.1	ASM2450823v1	Complete Genome	2.70339	Halobacteria
GCF_024609245.1	ASM2460924v1	Contig	3.89401	Halobacteria
GCF_024730625.1	ASM2473062v1	Complete Genome	3.72072	Halobacteria
GCF_024972735.1	ASM2497273v1	Complete Genome	3.17913	Halobacteria
GCF_024972755.1	ASM2497275v1	Complete Genome	2.78769	Halobacteria
GCF_025231485.1	ASM2523148v1	Complete Genome	4.37671	Halobacteria
GCF_025399835.1	ASM2539983v1	Contig	4.18799	Halobacteria
GCF_025457585.1	ASM2545758v1	Contig	3.68574	Halobacteria
GCF_025457605.1	ASM2545760v1	Contig	3.68574	Halobacteria
GCF_025629245.1	ASM2562924v1	Contig	3.75949	Halobacteria
GCF_025913575.1	ASM2591357v1	Complete Genome	3.95701	Halobacteria
GCF_025947005.1	ASM2594700v1	Complete Genome	5.03606	Halobacteria
GCF_026008575.1	ASM2600857v1	Scaffold	4.35591	Halobacteria
GCF_026013925.1	ASM2601392v1	Complete Genome	5.08647	Halobacteria
GCF_026242195.1	ASM2624219v1	Scaffold	2.10378	Halobacteria
GCF_026248685.1	ASM2624868v1	Complete Genome	4.81835	Halobacteria
GCF_026410925.1	ASM2641092v1	Complete Genome	3.76993	Halobacteria
GCF_026586625.1	ASM2658662v1	Scaffold	4.46181	Halobacteria
GCF_026586665.1	ASM2658666v1	Contig	3.57497	Halobacteria
GCF_026586675.1	ASM2658667v1	Scaffold	3.17426	Halobacteria
GCF_026616195.1	ASM2661619v1	Contig	4.60825	Halobacteria
GCF_026616205.1	ASM2661620v1	Contig	3.02439	Halobacteria
GCF_026712385.1	ASM2671238v1	Scaffold	3.97702	Halobacteria
GCF_900003505.1	ASM90000350v1	Scaffold	3.23578	Halobacteria
GCF_900003515.1	ASM90000351v1	Scaffold	3.23748	Halobacteria
GCF_900003525.1	ASM90000352v1	Scaffold	3.23531	Halobacteria
GCF_900003565.1	ASM90000356v1	Scaffold	3.23517	Halobacteria
GCF_900003575.1	ASM90000357v1	Scaffold	3.23341	Halobacteria
GCF_900004275.1	ASM90000427v1	Scaffold	3.23827	Halobacteria
GCF_900005775.1	ASM90000577v1	Scaffold	3.23365	Halobacteria
GCF_900100335.1	IMG-taxon 2636416021 annotated assembly	Contig	4.64179	Halobacteria
GCF_900100385.1	IMG-taxon 2651870124 annotated assembly	Scaffold	3.28712	Halobacteria
GCF_900100875.1	IMG-taxon 2671180169 annotated assembly	Contig	3.87175	Halobacteria
GCF_900101245.1	IMG-taxon 2651869596 annotated assembly	Scaffold	3.91427	Halobacteria
GCF_900102305.1	IMG-taxon 2651870125 annotated assembly	Scaffold	4.0322	Halobacteria
GCF_900102375.1	IMG-taxon 2617270761 annotated assembly	Scaffold	3.26138	Halobacteria
GCF_900103505.1	IMG-taxon 2651870127 annotated assembly	Scaffold	3.76861	Halobacteria
GCF_900103715.1	IMG-taxon 2617270902 annotated assembly	Contig	3.77019	Halobacteria
GCF_900104065.1	IMG-taxon 2636416047 annotated assembly	Scaffold	4.00987	Halobacteria
GCF_900106715.1	IMG-taxon 2693429892 annotated assembly	Scaffold	3.89664	Halobacteria
GCF_900107195.1	IMG-taxon 2617270777 annotated assembly	Contig	3.75498	Halobacteria
GCF_900107205.1	IMG-taxon 2654587885 annotated assembly	Scaffold	3.42449	Halobacteria
GCF_900107665.1	IMG-taxon 2617270898 annotated assembly	Scaffold	2.77686	Halobacteria
GCF_900108095.1	IMG-taxon 2617270925 annotated assembly	Scaffold	3.78254	Halobacteria
GCF_900108165.1	IMG-taxon 2619618869 annotated assembly	Scaffold	3.73596	Halobacteria
GCF_900108505.1	IMG-taxon 2651870118 annotated assembly	Scaffold	3.13682	Halobacteria
GCF_900109065.1	IMG-taxon 2693429898 annotated assembly	Contig	3.28459	Halobacteria
GCF_900109695.1	IMG-taxon 2639762639 annotated assembly	Scaffold	3.89408	Halobacteria
GCF_900110215.1	IMG-taxon 2654588107 annotated assembly	Scaffold	4.86976	Halobacteria
GCF_900110455.1	IMG-taxon 2671180170 annotated assembly	Scaffold	4.27217	Halobacteria
GCF_900110465.1	IMG-taxon 2617270928 annotated assembly	Scaffold	5.18569	Halobacteria
GCF_900110535.1	IMG-taxon 2617270915 annotated assembly	Contig	2.95279	Halobacteria
GCF_900110865.1	IMG-taxon 2639762573 annotated assembly	Scaffold	4.85702	Halobacteria
GCF_900111485.1	IMG-taxon 2642422550 annotated assembly	Scaffold	3.96348	Halobacteria
GCF_900111935.1	IMG-taxon 2617270732 annotated assembly	Scaffold	3.03055	Halobacteria
GCF_900112175.1	IMG-taxon 2617270920 annotated assembly	Contig	4.18712	Halobacteria
GCF_900112205.1	IMG-taxon 2693429869 annotated assembly	Scaffold	4.49544	Halobacteria
GCF_900113245.1	IMG-taxon 2617270917 annotated assembly	Contig	3.52931	Halobacteria
GCF_900113615.1	IMG-taxon 2617270873 annotated assembly	Contig	3.1841	Halobacteria
GCF_900114025.1	IMG-taxon 2693429900 annotated assembly	Contig	3.72347	Halobacteria
GCF_900114435.1	IMG-taxon 2667527389 annotated assembly	Scaffold	4.25033	Halobacteria
GCF_900114455.1	IMG-taxon 2619618990 annotated assembly	Scaffold	4.56668	Halobacteria
GCF_900115675.1	IMG-taxon 2663762745 annotated assembly	Contig	3.16063	Halobacteria
GCF_900115785.1	IMG-taxon 2617270895 annotated assembly	Scaffold	3.61627	Halobacteria
GCF_900116205.1	IMG-taxon 2639762563 annotated assembly	Contig	4.10815	Halobacteria
GCF_900129775.1	IMG-taxon 2695420988 annotated assembly	Scaffold	3.20825	Halobacteria
GCF_900142335.1	IMG-taxon 2698536698 annotated assembly	Contig	4.2837	Halobacteria
GCF_900156425.1	IMG-taxon 2681812914 annotated assembly	Scaffold	4.67171	Halobacteria
GCF_900156445.1	IMG-taxon 2681812915 annotated assembly	Contig	3.83092	Halobacteria
GCF_900156475.1	IMG-taxon 2681812919 annotated assembly	Scaffold	4.20979	Halobacteria
GCF_900182635.1	IMG-taxon 2724679794 annotated assembly	Contig	3.17602	Halobacteria
GCF_900188065.1	IMG-taxon 2724679803 annotated assembly	Contig	3.47786	Halobacteria
GCF_900188075.1	IMG-taxon 2724679704 annotated assembly	Contig	3.66685	Halobacteria
GCF_900215575.1	IMG-taxon 2728369221 annotated assembly	Contig	3.16418	Halobacteria
GCF_900880625.1	WSM64	Contig	3.3625	Halobacteria
GCF_902209435.1	Katie-F-Assembly-1	Contig	3.94831	Halobacteria
GCF_902377425.1	MGYG-HGUT-01693	Contig	3.42504	Halobacteria
GCF_902381785.1	UHGG_MGYG-HGUT-01639	Scaffold	4.01518	Halobacteria
GCF_902410085.1	KTX-Assembly-1	Contig	4.2886	Halobacteria
GCF_903989505.1	D2T2	Contig	2.97246	Halobacteria
GCF_903989525.1	D2T1	Scaffold	3.61124	Halobacteria
GCF_903989535.1	D2T31	Scaffold	2.73292	Halobacteria
GCF_903989545.1	D2T0	Contig	3.05815	Halobacteria
GCA_000196655.1	ASM19665v1	Complete Genome	2.40623	Methanohalobium
GCA_018609725.1	ASM1860972v1	Contig	2.08655	Methanohalobium
GCF_000196655.1	ASM19665v1	Complete Genome	2.40623	Methanohalobium
GCA_000025865.1	ASM2586v1	Complete Genome	2.01242	Methanohalophilus
GCA_001577555.1	ASM157755v1	Contig	1.95242	Methanohalophilus
GCA_001683555.1	ASM168355v1	Contig	1.89417	Methanohalophilus
GCA_001726015.1	ASM172601v1	Contig	1.88578	Methanohalophilus
GCA_001888095.1	ASM188809v1	Scaffold	1.99045	Methanohalophilus
GCA_001889405.1	ASM188940v1	Complete Genome	2.02296	Methanohalophilus
GCA_002761295.1	ASM276129v1	Chromosome	2.08498	Methanohalophilus
GCA_002973515.1	ASM297351v1	Contig	1.87194	Methanohalophilus
GCA_003722055.1	ASM372205v1	Contig	2.02154	Methanohalophilus
GCA_003722075.1	MethanohalophilusRSK	Contig	1.96904	Methanohalophilus
GCA_003722115.1	ASM372211v1	Contig	2.07914	Methanohalophilus
GCA_003722155.1	ASM372215v1	Contig	1.87053	Methanohalophilus
GCA_003940385.1	ASM394038v1	Contig	1.44266	Methanohalophilus
GCA_003940405.1	ASM394040v1	Contig	1.60447	Methanohalophilus
GCA_004104135.1	ASM410413v1	Contig	1.92872	Methanohalophilus
GCA_004137855.1	ASM413785v1	Scaffold	1.83009	Methanohalophilus
GCA_004340645.1	ASM434064v1	Contig	1.97802	Methanohalophilus
GCA_017874375.1	ASM1787437v1	Contig	2.11601	Methanohalophilus
GCA_900106905.1	IMG-taxon 2642422606 annotated assembly	Contig	2.02656	Methanohalophilus
GCA_900177455.1	IMG-taxon 2706794887 annotated assembly	Contig	2.08889	Methanohalophilus
GCA_900215215.1	IMG-taxon 2703719067 annotated assembly	Contig	1.9403	Methanohalophilus
GCF_000025865.1	ASM2586v1	Complete Genome	2.01242	Methanohalophilus
GCF_001888095.1	ASM188809v1	Scaffold	1.99045	Methanohalophilus
GCF_001889405.1	ASM188940v1	Complete Genome	2.02296	Methanohalophilus
GCF_002761295.1	ASM276129v1	Chromosome	2.08498	Methanohalophilus
GCF_002973515.1	ASM297351v1	Contig	1.87194	Methanohalophilus
GCF_003722055.1	ASM372205v1	Contig	2.02154	Methanohalophilus
GCF_003722075.1	MethanohalophilusRSK	Contig	1.96904	Methanohalophilus
GCF_003722115.1	ASM372211v1	Contig	2.07914	Methanohalophilus
GCF_003722155.1	ASM372215v1	Contig	1.87053	Methanohalophilus
GCF_004104135.1	ASM410413v1	Contig	1.92872	Methanohalophilus
GCF_004137855.1	ASM413785v1	Scaffold	1.83009	Methanohalophilus
GCF_004340645.1	ASM434064v1	Contig	1.97802	Methanohalophilus
GCF_017874375.1	ASM1787437v1	Contig	2.11601	Methanohalophilus
GCF_900106905.1	IMG-taxon 2642422606 annotated assembly	Contig	2.02656	Methanohalophilus
GCF_900177455.1	IMG-taxon 2706794887 annotated assembly	Contig	2.08889	Methanohalophilus
GCF_900215215.1	IMG-taxon 2703719067 annotated assembly	Contig	1.9403	Methanohalophilus
GCA_000217995.1	ASM21799v1	Complete Genome	2.13844	Methanosalsum
GCA_003838235.1	ASM383823v1	Contig	1.53302	Methanosalsum
GCA_007127385.1	ASM712738v1	Contig	1.33393	Methanosalsum
GCA_024808815.1	ASM2480881v1	Contig	2.03072	Methanosalsum
GCF_000217995.1	ASM21799v1	Complete Genome	2.13844	Methanosalsum
GCF_024808815.1	ASM2480881v1	Contig	2.03072	Methanosalsum
