# Supplementary material for: Eco-evolutionary strategies for relieving carbon limitation under salt stress differ across microbial clades
Source: Research Square preprint supplement (doi:10.21203/rs.3.rs-3322692/v1), 2023-09-21
Supplement: Supplementary file 4 [file d2a53592e9aed0303a8c2e09.xlsx]

## Sheet: Carbon fixation
Function	Gene	KO	Description
Reductive pentose phosphate cycle (Calvin cycle)	rbcL	K01601	ribulose-bisphosphate carboxylase large chain [EC:4.1.1.39]
Reductive pentose phosphate cycle (Calvin cycle)	rbcS	K01602	ribulose-bisphosphate carboxylase small chain [EC:4.1.1.39]
Reductive pentose phosphate cycle (Calvin cycle)	GAPA	K05298	glyceraldehyde-3-phosphate dehydrogenase (NADP+) (phosphorylating) [EC:1.2.1.13]
Reductive pentose phosphate cycle (Calvin cycle)	gap2	K00150	glyceraldehyde-3-phosphate dehydrogenase (NAD(P)) [EC:1.2.1.59]
Reductive pentose phosphate cycle (Calvin cycle)	GAPDH	K00134	glyceraldehyde 3-phosphate dehydrogenase (phosphorylating) [EC:1.2.1.12]
Reductive pentose phosphate cycle (Calvin cycle)	ALDO	K01623	fructose-bisphosphate aldolase, class I [EC:4.1.2.13]
Reductive pentose phosphate cycle (Calvin cycle)	FBA	K01624	fructose-bisphosphate aldolase, class II [EC:4.1.2.13]
Reductive pentose phosphate cycle (Calvin cycle)	FBP	K03841	fructose-1,6-bisphosphatase I [EC:3.1.3.11]
Reductive pentose phosphate cycle (Calvin cycle)	glpX	K02446	fructose-1,6-bisphosphatase II [EC:3.1.3.11]
Reductive pentose phosphate cycle (Calvin cycle)	glpX-SEBP	K11532	fructose-1,6-bisphosphatase II / sedoheptulose-1,7-bisphosphatase [EC:3.1.3.11 3.1.3.37]
Reductive pentose phosphate cycle (Calvin cycle)	fbp-SEBP	K01086	fructose-1,6-bisphosphatase I / sedoheptulose-1,7-bisphosphatase [EC:3.1.3.11 3.1.3.37]
Reductive pentose phosphate cycle (Calvin cycle)	E2.2.1.1	K00615	transketolase [EC:2.2.1.1]
Reductive pentose phosphate cycle (Calvin cycle)	E3.1.3.37	K01100	sedoheptulose-bisphosphatase [EC:3.1.3.37]
Reductive pentose phosphate cycle (Calvin cycle)	rpiA	K01807	ribose 5-phosphate isomerase A [EC:5.3.1.6]
Reductive pentose phosphate cycle (Calvin cycle)	rpiB	K01808	ribose 5-phosphate isomerase B [EC:5.3.1.6]
Reductive citrate cycle (Arnon-Buchanan cycle)	porA	K00169	pyruvate ferredoxin oxidoreductase alpha subunit [EC:1.2.7.1]
Reductive citrate cycle (Arnon-Buchanan cycle)	porB	K00170	pyruvate ferredoxin oxidoreductase beta subunit [EC:1.2.7.1]
Reductive citrate cycle (Arnon-Buchanan cycle)	porD	K00171	pyruvate ferredoxin oxidoreductase delta subunit [EC:1.2.7.1]
Reductive citrate cycle (Arnon-Buchanan cycle)	porC	K00172	pyruvate ferredoxin oxidoreductase gamma subunit [EC:1.2.7.1]
Reductive citrate cycle (Arnon-Buchanan cycle)	por	K03737	pyruvate-ferredoxin/flavodoxin oxidoreductase [EC:1.2.7.1 1.2.7.-]
Reductive citrate cycle (Arnon-Buchanan cycle)	pps	K01007	pyruvate, water dikinase [EC:2.7.9.2]
Reductive citrate cycle (Arnon-Buchanan cycle)	ppdK	K01006	orthophosphate dikinase [EC:2.7.9.1]
Reductive citrate cycle (Arnon-Buchanan cycle)	ppc	K01595	phosphoenolpyruvate carboxylase [EC:4.1.1.31]
Reductive citrate cycle (Arnon-Buchanan cycle)	pycA	K01959	pyruvate carboxylase subunit A [EC:6.4.1.1]
Reductive citrate cycle (Arnon-Buchanan cycle)	pycB	K01960	pyruvate carboxylase subunit B [EC:6.4.1.1]
Reductive citrate cycle (Arnon-Buchanan cycle)	PC	K01958	pyruvate carboxylase [EC:6.4.1.1]
Reductive citrate cycle (Arnon-Buchanan cycle)	mdh	K00024	malate dehydrogenase [EC:1.1.1.37]
Reductive citrate cycle (Arnon-Buchanan cycle)	E4.2.1.2A	K01676	fumarate hydratase, class I [EC:4.2.1.2]
Reductive citrate cycle (Arnon-Buchanan cycle)	E4.2.1.2B	K01679	fumarate hydratase, class II [EC:4.2.1.2]
Reductive citrate cycle (Arnon-Buchanan cycle)	E4.2.1.2AA	K01677	fumarate hydratase subunit alpha [EC:4.2.1.2]
Reductive citrate cycle (Arnon-Buchanan cycle)	E4.2.1.2AB	K01678	fumarate hydratase subunit beta [EC:4.2.1.2]
Reductive citrate cycle (Arnon-Buchanan cycle)	sdhA	K00239	succinate dehydrogenase / fumarate reductase, flavoprotein subunit [EC:1.3.5.1 1.3.5.4]
Reductive citrate cycle (Arnon-Buchanan cycle)	sdhB	K00240	succinate dehydrogenase / fumarate reductase, iron-sulfur subunit [EC:1.3.5.1 1.3.5.4]
Reductive citrate cycle (Arnon-Buchanan cycle)	sdhC	K00241	succinate dehydrogenase / fumarate reductase, cytochrome b subunit
Reductive citrate cycle (Arnon-Buchanan cycle)	sdhD	K00242	succinate dehydrogenase / fumarate reductase, membrane anchor subunit
Reductive citrate cycle (Arnon-Buchanan cycle)	frdA	K18556	NADH-dependent fumarate reductase subunit A [EC:1.3.1.6]
Reductive citrate cycle (Arnon-Buchanan cycle)	frdB	K00245	fumarate reductase iron-sulfur subunit [EC:1.3.5.4]
Reductive citrate cycle (Arnon-Buchanan cycle)	frdC	K00246	fumarate reductase subunit C
Reductive citrate cycle (Arnon-Buchanan cycle)	frdD	K00247	fumarate reductase subunit D
Reductive citrate cycle (Arnon-Buchanan cycle)	frdA	K18556	NADH-dependent fumarate reductase subunit A [EC:1.3.1.6]
Reductive citrate cycle (Arnon-Buchanan cycle)	frdB	K00245	fumarate reductase iron-sulfur subunit [EC:1.3.5.4]
Reductive citrate cycle (Arnon-Buchanan cycle)	frdC	K00246	fumarate reductase subunit C
Reductive citrate cycle (Arnon-Buchanan cycle)	frdD	K00247	fumarate reductase subunit D
Reductive citrate cycle (Arnon-Buchanan cycle)	sucD	K01902	succinyl-CoA synthetase alpha subunit [EC:6.2.1.5]
Reductive citrate cycle (Arnon-Buchanan cycle)	sucC	K01903	succinyl-CoA synthetase beta subunit [EC:6.2.1.5]
Reductive citrate cycle (Arnon-Buchanan cycle)	korA	K00174	2-oxoglutarate/2-oxoacid ferredoxin oxidoreductase subunit alpha [EC:1.2.7.3 1.2.7.11]
Reductive citrate cycle (Arnon-Buchanan cycle)	korB	K00175	2-oxoglutarate/2-oxoacid ferredoxin oxidoreductase subunit beta [EC:1.2.7.3 1.2.7.11]
Reductive citrate cycle (Arnon-Buchanan cycle)	korC	K00177	2-oxoglutarate ferredoxin oxidoreductase subunit gamma [EC:1.2.7.3]
Reductive citrate cycle (Arnon-Buchanan cycle)	korD	K00176	2-oxoglutarate ferredoxin oxidoreductase subunit delta [EC:1.2.7.3]
Reductive citrate cycle (Arnon-Buchanan cycle)	IDH1	K00031	isocitrate dehydrogenase [EC:1.1.1.42]
Reductive citrate cycle (Arnon-Buchanan cycle)	ACO	K01681	aconitate hydratase [EC:4.2.1.3]
Reductive citrate cycle (Arnon-Buchanan cycle)	acnB	K01682	aconitate hydratase 2 / 2-methylisocitrate dehydratase [EC:4.2.1.3 4.2.1.99]
Reductive citrate cycle (Arnon-Buchanan cycle)	aclA	K15230	ATP-citrate lyase alpha-subunit [EC:2.3.3.8]
Reductive citrate cycle (Arnon-Buchanan cycle)	aclB	K15231	ATP-citrate lyase beta-subunit [EC:2.3.3.8]
Reductive citrate cycle (Arnon-Buchanan cycle)	ccsA	K15232	citryl-CoA synthetase large subunit [EC:6.2.1.18]
Reductive citrate cycle (Arnon-Buchanan cycle)	ccl	K15234	citryl-CoA lyase [EC:4.1.3.34]
3-Hydroxypropionate bi-cycle	accB	K02160	acetyl-CoA carboxylase biotin carboxyl carrier protein
3-Hydroxypropionate bi-cycle	accC	K01961	acetyl-CoA carboxylase, biotin carboxylase subunit [EC:6.4.1.2 6.3.4.14]
3-Hydroxypropionate bi-cycle	accA	K01962	acetyl-CoA carboxylase carboxyl transferase subunit alpha [EC:6.4.1.2 2.1.3.15]
3-Hydroxypropionate bi-cycle	accD	K01963	acetyl-CoA carboxylase carboxyl transferase subunit beta [EC:6.4.1.2 2.1.3.15]
3-Hydroxypropionate bi-cycle	mcr	K14468	malonyl-CoA reductase / 3-hydroxypropionate dehydrogenase (NADP+) [EC:1.2.1.75 1.1.1.298]
3-Hydroxypropionate bi-cycle	K14469	K14469	acrylyl-CoA reductase (NADPH) / 3-hydroxypropionyl-CoA dehydratase / 3-hydroxypropionyl-CoA synthetase [EC:1.3.1.84 4.2.1.116 6.2.1.36]
3-Hydroxypropionate bi-cycle	K15052	K15052	propionyl-CoA carboxylase [EC:6.4.1.3 2.1.3.15]
3-Hydroxypropionate bi-cycle	MCEE	K05606	methylmalonyl-CoA/ethylmalonyl-CoA epimerase [EC:5.1.99.1]
3-Hydroxypropionate bi-cycle	MUT	K01847	methylmalonyl-CoA mutase [EC:5.4.99.2]
3-Hydroxypropionate bi-cycle	E5.4.99.2A	K01848	methylmalonyl-CoA mutase, N-terminal domain [EC:5.4.99.2]
3-Hydroxypropionate bi-cycle	E5.4.99.2B	K01849	methylmalonyl-CoA mutase, C-terminal domain [EC:5.4.99.2]
3-Hydroxypropionate bi-cycle	smtA1	K14471	succinyl-CoA:(S)-malate CoA-transferase subunit A [EC:2.8.3.22]
3-Hydroxypropionate bi-cycle	smtB	K14472	succinyl-CoA:(S)-malate CoA-transferase subunit B [EC:2.8.3.22]
3-Hydroxypropionate bi-cycle	sdhA	K00239	succinate dehydrogenase / fumarate reductase, flavoprotein subunit [EC:1.3.5.1 1.3.5.4]
3-Hydroxypropionate bi-cycle	sdhB	K00240	succinate dehydrogenase / fumarate reductase, iron-sulfur subunit [EC:1.3.5.1 1.3.5.4]
3-Hydroxypropionate bi-cycle	sdhC	K00241	succinate dehydrogenase / fumarate reductase, cytochrome b subunit
3-Hydroxypropionate bi-cycle	E4.2.1.2B	K01679	fumarate hydratase, class II [EC:4.2.1.2]
3-Hydroxypropionate bi-cycle	mcl	K08691	malyl-CoA/(S)-citramalyl-CoA lyase [EC:4.1.3.24 4.1.3.25]
3-Hydroxypropionate bi-cycle	mch	K14449	2-methylfumaryl-CoA hydratase [EC:4.2.1.148]
3-Hydroxypropionate bi-cycle	mct	K14470	2-methylfumaryl-CoA isomerase [EC:5.4.1.3]
3-Hydroxypropionate bi-cycle	meh	K09709	3-methylfumaryl-CoA hydratase [EC:4.2.1.153]
Hydroxypropionate-hydroxybutylate cycle	K15037	K15037	biotin carboxyl carrier protein
Hydroxypropionate-hydroxybutylate cycle	K15036	K15036	acetyl-CoA/propionyl-CoA carboxylase [EC:6.4.1.2 6.4.1.3 2.1.3.15]
Hydroxypropionate-hydroxybutylate cycle	K15039	K15039	3-hydroxypropionate dehydrogenase (NADP+) [EC:1.1.1.298]
Hydroxypropionate-hydroxybutylate cycle	K15019	K15019	3-hydroxypropionyl-coenzyme A dehydratase [EC:4.2.1.116]
Hydroxypropionate-hydroxybutylate cycle	K15020	K15020	acryloyl-coenzyme A reductase [EC:1.3.1.84]
Hydroxypropionate-hydroxybutylate cycle	MCEE	K05606	methylmalonyl-CoA/ethylmalonyl-CoA epimerase [EC:5.1.99.1]
Hydroxypropionate-hydroxybutylate cycle	E5.4.99.2A	K01848	methylmalonyl-CoA mutase, N-terminal domain [EC:5.4.99.2]
Hydroxypropionate-hydroxybutylate cycle	E5.4.99.2B	K01849	methylmalonyl-CoA mutase, C-terminal domain [EC:5.4.99.2]
Hydroxypropionate-hydroxybutylate cycle	K14465	K14465	succinate semialdehyde reductase (NADPH) [EC:1.1.1.-]
Hydroxypropionate-hydroxybutylate cycle	abfD	K14534	4-hydroxybutyryl-CoA dehydratase / vinylacetyl-CoA-Delta-isomerase [EC:4.2.1.120 5.3.3.3]
Hydroxypropionate-hydroxybutylate cycle	K15016	K15016	enoyl-CoA hydratase / 3-hydroxyacyl-CoA dehydrogenase [EC:4.2.1.17 1.1.1.35]
Hydroxypropionate-hydroxybutylate cycle	ACAT	K00626	acetyl-CoA C-acetyltransferase [EC:2.3.1.9]
Dicarboxylate-hydroxybutyrate cycle	porA	K00169	pyruvate ferredoxin oxidoreductase alpha subunit [EC:1.2.7.1]
Dicarboxylate-hydroxybutyrate cycle	porB	K00170	pyruvate ferredoxin oxidoreductase beta subunit [EC:1.2.7.1]
Dicarboxylate-hydroxybutyrate cycle	porD	K00171	pyruvate ferredoxin oxidoreductase delta subunit [EC:1.2.7.1]
Dicarboxylate-hydroxybutyrate cycle	porC	K00172	pyruvate ferredoxin oxidoreductase gamma subunit [EC:1.2.7.1]
Dicarboxylate-hydroxybutyrate cycle	pps	K01007	pyruvate, water dikinase [EC:2.7.9.2]
Dicarboxylate-hydroxybutyrate cycle	ppc	K01595	phosphoenolpyruvate carboxylase [EC:4.1.1.31]
Dicarboxylate-hydroxybutyrate cycle	mdh	K00024	malate dehydrogenase [EC:1.1.1.37]
Dicarboxylate-hydroxybutyrate cycle	E4.2.1.2AA	K01677	fumarate hydratase subunit alpha [EC:4.2.1.2]
Dicarboxylate-hydroxybutyrate cycle	E4.2.1.2AB	K01678	fumarate hydratase subunit beta [EC:4.2.1.2]
Dicarboxylate-hydroxybutyrate cycle	sdhA	K00239	succinate dehydrogenase / fumarate reductase, flavoprotein subunit [EC:1.3.5.1 1.3.5.4]
Dicarboxylate-hydroxybutyrate cycle	sdhB	K00240	succinate dehydrogenase / fumarate reductase, iron-sulfur subunit [EC:1.3.5.1 1.3.5.4]
Dicarboxylate-hydroxybutyrate cycle	sdhC	K00241	succinate dehydrogenase / fumarate reductase, cytochrome b subunit
Dicarboxylate-hydroxybutyrate cycle	sucD	K01902	succinyl-CoA synthetase alpha subunit [EC:6.2.1.5]
Dicarboxylate-hydroxybutyrate cycle	sucC	K01903	succinyl-CoA synthetase beta subunit [EC:6.2.1.5]
Dicarboxylate-hydroxybutyrate cycle	K14465	K14465	succinate semialdehyde reductase (NADPH) [EC:1.1.1.-]
Dicarboxylate-hydroxybutyrate cycle	abfD	K14534	4-hydroxybutyryl-CoA dehydratase / vinylacetyl-CoA-Delta-isomerase [EC:4.2.1.120 5.3.3.3]
Dicarboxylate-hydroxybutyrate cycle	K15016	K15016	enoyl-CoA hydratase / 3-hydroxyacyl-CoA dehydrogenase [EC:4.2.1.17 1.1.1.35]
Dicarboxylate-hydroxybutyrate cycle	ACAT	K00626	acetyl-CoA C-acetyltransferase [EC:2.3.1.9]
Reductive acetyl-CoA pathway (Wood-Ljungdahl pathway)	cooS	K00198	anaerobic carbon-monoxide dehydrogenase catalytic subunit [EC:1.2.7.4]
Reductive acetyl-CoA pathway (Wood-Ljungdahl pathway)	fdhA	K05299	formate dehydrogenase (NADP+) alpha subunit [EC:1.17.1.10]
Reductive acetyl-CoA pathway (Wood-Ljungdahl pathway)	fdhB	K15022	formate dehydrogenase (NADP+) beta subunit [EC:1.17.1.10]
Reductive acetyl-CoA pathway (Wood-Ljungdahl pathway)	fdhF	K22015	formate dehydrogenase (hydrogenase) [EC:1.17.98.4 1.17.98.-]
Reductive acetyl-CoA pathway (Wood-Ljungdahl pathway)	fhs	K01938	formate--tetrahydrofolate ligase [EC:6.3.4.3]
Reductive acetyl-CoA pathway (Wood-Ljungdahl pathway)	folD	K01491	methylenetetrahydrofolate dehydrogenase (NADP+) / methenyltetrahydrofolate cyclohydrolase [EC:1.5.1.5 3.5.4.9]
Reductive acetyl-CoA pathway (Wood-Ljungdahl pathway)	fchA	K01500	methenyltetrahydrofolate cyclohydrolase [EC:3.5.4.9]
Reductive acetyl-CoA pathway (Wood-Ljungdahl pathway)	metF	K00297	methylenetetrahydrofolate reductase (NADH) [EC:1.5.1.54]
Reductive acetyl-CoA pathway (Wood-Ljungdahl pathway)	acsE	K15023	5-methyltetrahydrofolate corrinoid/iron sulfur protein methyltransferase [EC:2.1.1.258]
Reductive acetyl-CoA pathway (Wood-Ljungdahl pathway)	acsB	K14138	acetyl-CoA synthase [EC:2.3.1.169]
Reductive acetyl-CoA pathway (Wood-Ljungdahl pathway)	cdhE	K00197	acetyl-CoA decarbonylase/synthase, CODH/ACS complex subunit gamma [EC:2.1.1.245]
Reductive acetyl-CoA pathway (Wood-Ljungdahl pathway)	cdhD	K00194	acetyl-CoA decarbonylase/synthase, CODH/ACS complex subunit delta [EC:2.1.1.245
Incomplete reductive citrate cycle	porA	K00169	pyruvate ferredoxin oxidoreductase alpha subunit [EC:1.2.7.1]
Incomplete reductive citrate cycle	porB	K00170	pyruvate ferredoxin oxidoreductase beta subunit [EC:1.2.7.1]
Incomplete reductive citrate cycle	porD	K00171	pyruvate ferredoxin oxidoreductase delta subunit [EC:1.2.7.1]
Incomplete reductive citrate cycle	porC	K00172	pyruvate ferredoxin oxidoreductase gamma subunit [EC:1.2.7.1]
Incomplete reductive citrate cycle	pycA	K01959	pyruvate carboxylase subunit A [EC:6.4.1.1]
Incomplete reductive citrate cycle	pycB	K01960	pyruvate carboxylase subunit B [EC:6.4.1.1]
Incomplete reductive citrate cycle	mdh	K00024	malate dehydrogenase [EC:1.1.1.37]
Incomplete reductive citrate cycle	E4.2.1.2AA	K01677	fumarate hydratase subunit alpha [EC:4.2.1.2]
Incomplete reductive citrate cycle	E4.2.1.2AB	K01678	fumarate hydratase subunit beta [EC:4.2.1.2]
Incomplete reductive citrate cycle	tfrA	K18209	fumarate reductase (CoM/CoB) subunit A [EC:1.3.4.1]
Incomplete reductive citrate cycle	tfrB	K18210	fumarate reductase (CoM/CoB) subunit B [EC:1.3.4.1]
Incomplete reductive citrate cycle	sucD	K01902	succinyl-CoA synthetase alpha subunit [EC:6.2.1.5]
Incomplete reductive citrate cycle	sucC	K01903	succinyl-CoA synthetase beta subunit [EC:6.2.1.5]
Incomplete reductive citrate cycle	korA	K00174	2-oxoglutarate/2-oxoacid ferredoxin oxidoreductase subunit alpha [EC:1.2.7.3 1.2.7.11]
Incomplete reductive citrate cycle	korB	K00175	2-oxoglutarate/2-oxoacid ferredoxin oxidoreductase subunit beta [EC:1.2.7.3 1.2.7.11]
Incomplete reductive citrate cycle	korD	K00176	2-oxoglutarate ferredoxin oxidoreductase subunit delta [EC:1.2.7.3]
Incomplete reductive citrate cycle	korC	K00177	2-oxoglutarate ferredoxin oxidoreductase subunit gamma [EC:1.2.7.3]
